# Supplementary material for: Catalyst-free, visible-light-promoted S–H insertion reaction between thiols and α-diazoesters
Source: Royal Society of Chemistry journal article supplement (doi:10.1039/d0ob02006k), 2020-01-01

## Supporting Information

for

### **Catalyst-free, visible-light-promoted S–H insertion reaction between thiols and $\alpha$ -diazoesters**

Jingya Yang,<sup>\*a</sup> Ganggang Wang,<sup>a</sup> Shuwen Chen,<sup>a</sup> Ben Ma,<sup>\*a</sup> Hongyan Zhou,<sup>a,b</sup> Menghui Song,<sup>a</sup> Cai Liu<sup>a</sup>  
and Congde Huo<sup>\*a</sup>

<sup>a</sup>College of Chemistry and Chemical Engineering, Northwest Normal University, Lanzhou 730070, China

<sup>b</sup>College of Science, Gansu Agricultural University, Lanzhou 730070, China

E-mail: yangjy@nwnu.edu.cn; maben@nwnu.edu.cn; hucongde1978@hotmail.com

#### List of Contents

|                                                                      |     |
|----------------------------------------------------------------------|-----|
| 1. General Information.....                                          | S2  |
| 2. General Procedure for Preparation of $\alpha$ -Dizaoacetates..... | S3  |
| 3. Experimental Procedures.....                                      | S4  |
| 4. Characterization Data of Products.....                            | S7  |
| 5. References.....                                                   | S21 |
| 6. Cope of NMR Spectra.....                                          | S22 |

## 1. General Information

$^1\text{H}$  NMR,  $^{13}\text{C}$  NMR and  $^{19}\text{F}$  NMR spectra were recorded on an Agilent Technologies DD2 (600 MHz) or a Varian Mercury-400 Plus spectrometer in  $\text{CDCl}_3$ . High-resolution mass spectra (HRMS) were reported from the Thermo Orbitrap Elite or Bruker Daltonics APEXII 47e FT-ICR instrument with an ESI source. UV-Visible absorption spectra were recorded on an Agilent 8453 spectrophotometer. Unless otherwise noted, all reactions were carried out in Pyrex glass tube with magnetic stirring bar. Reactions were monitored by thin layer chromatography (TLC) using pre-coated silica gel plates (GF254). Flash column chromatography was performed on silica gel 60 (particle size 200–400 mesh ASTM, purchased from Liangchen, China) and eluted with petroleum ether/ethylacetate.

All thiols (**1a–1x**) and ethyl diazoacetate (**2a**) used in the substrate expansion study of this work were purchased from Bidepharm.com or Energy Chemical, and were used directly without further purification. Aryldiazoacetates (**2b–2q**) used in this work were prepared according to the corresponding literature procedure.<sup>[1]</sup> Anhydrous acetylene (MeCN) was distilled from phosphorus pentoxide ( $\text{P}_2\text{O}_5$ ) to use.

The 23 W CFL lamps employed in this work were bought from supermarket. The distance from the light source to the irradiation vessel is about 2.5 cm (**Figure S1**). The temperature was controlled by a fan.

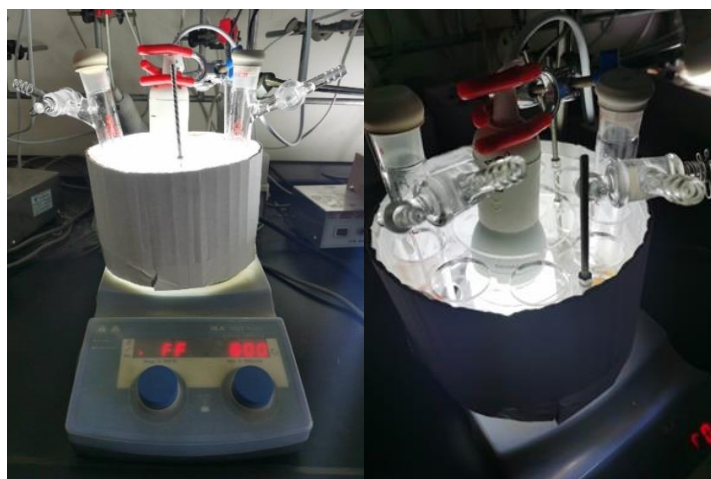

**Figure S1.** Setup of Photochemical Reaction

## 2. General procedure for preparation of $\alpha$ -diaoesters<sup>[1]</sup>

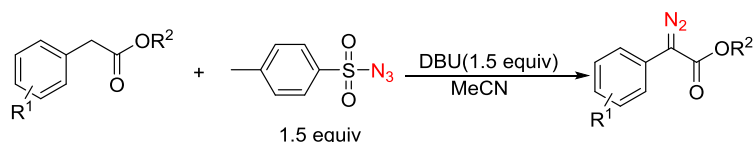

To a mixture of ester (10 mmol) and tosyl azide (2.96 g, 15 mmol) in anhydrous MeCN (15 mL), 1,8-diazabicyclo[5.4.0]undec-7-ene (DBU) (2.24 mL, 2.28 g, 15 mmol) was added. The reaction mixture was stirred at room temperature for overnight. Upon complete consumption of the starting materials, the reaction mixture was quenched with saturated aqueous solution of  $NH_4Cl$  (5 mL), extracted with  $CH_2Cl_2$  ( $3 \times 30$  mL), washed with brine ( $3 \times 10$  mL), dried over  $MgSO_4$ , and concentrated under reduced pressure. The residue was purified by flash chromatography (hexane : EtOAc = 9:1) to afford the  $\alpha$ -diaoester.

Except for  $\alpha$ -diaoacetates **2n**, the other aryl diazoacetates **2b–2q** used in this work are all reported products.<sup>[1-7]</sup> The characterization data of new diazoacetate **2n** are listed as follow:

### Isopropyl 2-diazo-2-(2,5-difluorophenyl)acetate (**2n**)

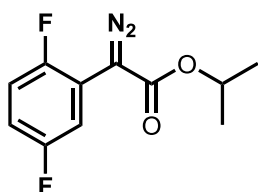

General procedure above is employed with Isopropyl 2-(2,5-difluorophenyl)acetate (2.14 g, 10 mmol) and tosyl azide (2.96 g, 15 mmol). Purification by flash column chromatography on silica gel (hexane : EtOAc = 9:1) to affords the title product **2n**.

Yellow oil; yield: 1.92 g (80%).

$^1H$  NMR (400 MHz,  $CDCl_3$ ):  $\delta$  = 7.56–7.51 (m, 1H), 7.03–6.97 (m, 1H), 6.89–6.83 (m, 1H), 5.23–5.14 (m, 1H), 1.32 (d,  $J$  = 6.4 Hz, 6H).

$^{13}C$  NMR (100 MHz,  $CDCl_3$ ):  $\delta$  = 164.2, 160.0, 157.6, 155.1, 116.4 (d,  $J$  = 9.2 Hz), 116.2 (d,  $J$  = 9.1 Hz), 115.1 (d,  $J$  = 27.2 Hz), 114.1 (d,  $J$  = 8.4 Hz), 113.9 (d,  $J$  = 8.6 Hz), 69.2, 22.0.

$^{19}F$  NMR (376 MHz,  $CDCl_3$ ):  $\delta$  = -117.94–118.05 (m), -120.99 (s).

HRMS (ESI):  $m/z$  [ $M+Na$ ]<sup>+</sup> calcd for  $C_{11}H_{10}F_2N_2NaO_2$ <sup>+</sup>: 263.0603; found: 263.0598.





mL Pyrex glass tube. The reaction mixture was continually stirred at room temperature under a 23 W CFL irradiation for 18 hours. The reaction solution was concentrated under reduced pressure and the residue was analyzed by TLC and HRMS, respectively. There, **3aa** was not detected with TLC and the TEMPO trapped thiyl radical was detected by HRMS (**Figure S2**, data of  $[M+H]^+$  are showed).

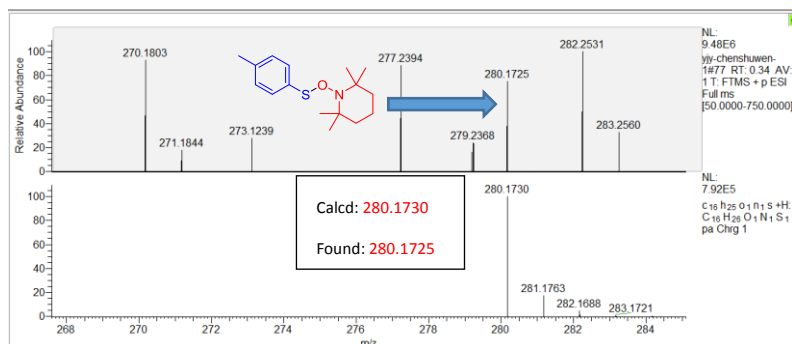

**Figure S2**

## (2) Radical-trapping experiment with 1,1-diphenylethylene

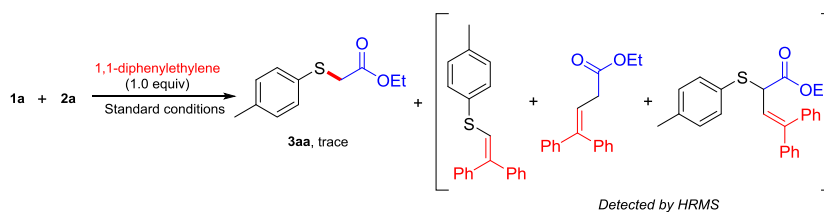

4-Methylbenzenethiol **1a** (37.3 mg, 0.3 mmol), ethyl diazoacetate **2a** (0.6 mmol, 68.5 mg, 2 equiv), 1,1-diphenylethylene (54.1 mg, 0.3 mmol, 1.0 equiv) and MeCN/H<sub>2</sub>O (10:1, 3 mL) were added into a 25 mL Pyrex glass tube. The reaction mixture was continually stirred at room temperature under a 23 W CFL irradiation for 18 hours, only a trace amount of **3aa** was detected by TLC and the radical intermediates trapped by 1,1-diphenylethylene were detected by HRMS (**Figure S3-S5**, data of  $[M+H]^+$  are showed).

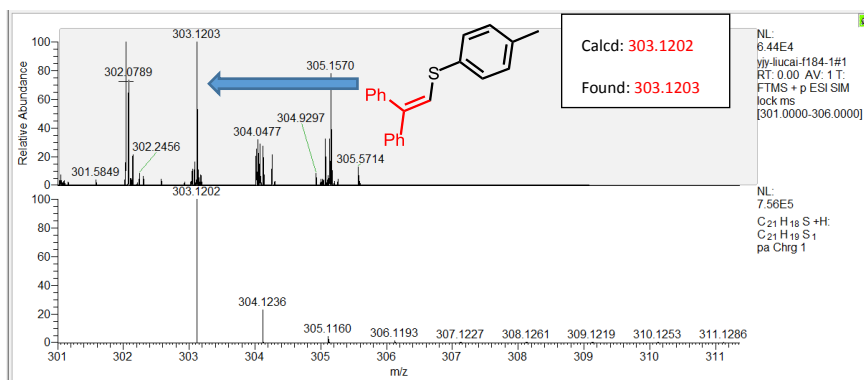

Figure S3

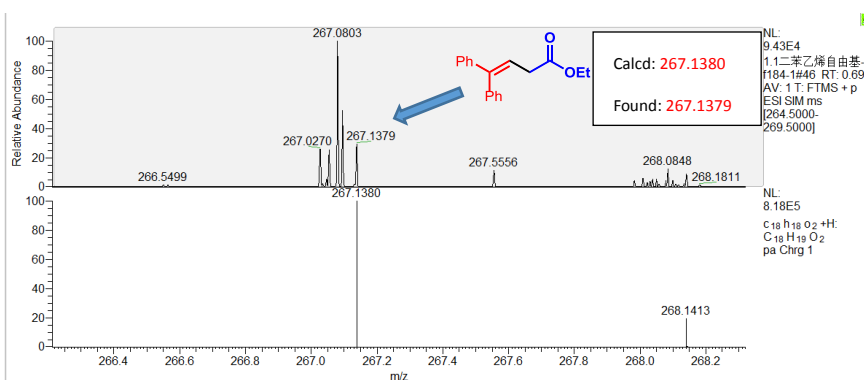

Figure S4

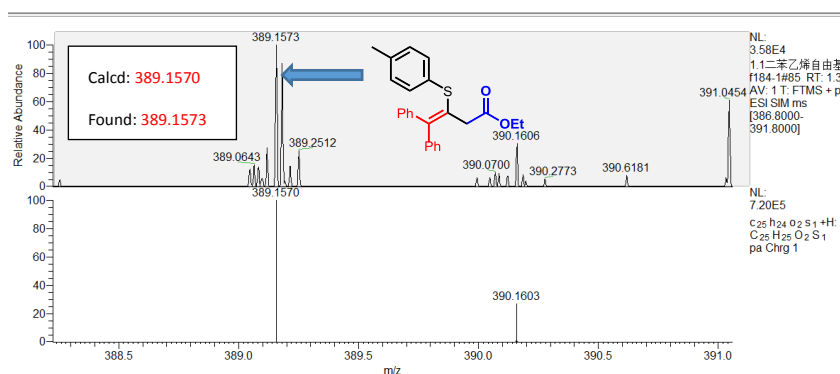

Figure S5

#### (4) The experiment starting from disulfide **4a**

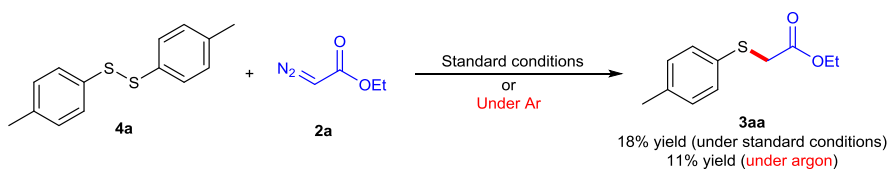

1,2-Di-*p*-tolylidysulfane **4a** (73.9 mg, 0.3 mmol), ethyl diazoacetate **2a** (68.5 mg, 0.6 mmol, 2 equiv) and MeCN:H<sub>2</sub>O (10:1, 3 mL) were added into a 25 mL Pyrex glass tube. The reaction

mixture was continually stirred at room temperature under a 23 W CFL irradiation for 18 hours. The reaction solution was quenched with saturated aq. NaCl (2 mL) and extracted with EtOAc (3 × 5 mL). The combined organic phase was dried over anhydrous Na<sub>2</sub>SO<sub>4</sub>, filtrated and concentrated under reduced pressure. The residue was purified by column chromatography on silica gel (PE : EtOAc = 20:1) to afford pure **3aa** in 18% yield. In addition, **3aa** was obtained in 11% yield under argon atmosphere.

#### 4. Characterization Data of Products

##### 1) Ethyl 2-(*p*-tolylthio)acetate (**3aa**)<sup>[8]</sup>

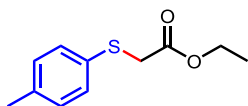

Colorless oil; yield: 56.1 mg (89%).

<sup>1</sup>H NMR (600 MHz, CDCl<sub>3</sub>): δ = 7.33 (d, *J* = 8.4 Hz, 2H), 7.11 (d, *J* = 8.4 Hz, 2H), 4.15 (q, *J* = 7.2 Hz, 2H), 3.57 (s, 2H), 2.32 (s, 3H), 1.22 (t, *J* = 7.2 Hz, 3H).

<sup>13</sup>C NMR (150 MHz, CDCl<sub>3</sub>): δ = 169.6, 135.0, 133.3, 130.0, 129.0, 126.9, 61.5, 36.7, 14.0.

HRMS (ESI): *m/z* [M+H]<sup>+</sup> calcd for C<sub>11</sub>H<sub>15</sub>O<sub>2</sub>S<sup>+</sup>: 211.0787; found: 211.0790.

##### 2) Ethyl 2-(phenylthio)acetate (**3ba**)<sup>[9]</sup>

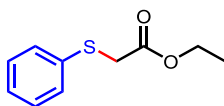

Colorless oil; yield: 49.5 mg (84%).

<sup>1</sup>H NMR (600 MHz, CDCl<sub>3</sub>): δ = 7.41–7.40 (m, 2H), 7.30–7.28 (m, 2H), 7.23–7.20 (m, 1H), 4.15 (q, *J* = 7.2 Hz, 2H), 3.63 (s, 2H), 1.21 (t, *J* = 7.2 Hz, 3H).

<sup>13</sup>C NMR (150 MHz, CDCl<sub>3</sub>): δ = 169.7, 137.2, 131.1, 130.9, 129.7, 61.3, 37.3, 21.0, 14.0.

##### 3) Ethyl 2-((4-isopropylphenyl)thio)acetate (**3ca**)<sup>[9]</sup>

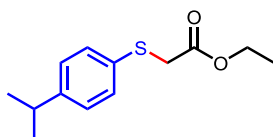

Colorless oil; yield: 57.9 mg (81%).

$^1\text{H}$  NMR (600 MHz,  $\text{CDCl}_3$ ):  $\delta$  = 7.35 (d,  $J$  = 8.4 Hz, 2H), 7.16 (d,  $J$  = 8.4 Hz, 2H), 4.15 (q,  $J$  = 7.2 Hz, 2H), 3.58 (s, 2H), 2.89–2.85 (m, 1H), 1.23 (s, 3H), 1.22 (s, 3H), 1.21 (t,  $J$  = 7.2 Hz, 3H).

$^{13}\text{C}$  NMR (150 MHz,  $\text{CDCl}_3$ ):  $\delta$  = 169.8, 148.2, 131.5, 130.9, 127.2, 61.4, 37.3, 33.7, 23.8, 14.0.

#### 4) Ethyl 2-((4-(*tert*-butyl)phenyl)thio)acetate (3da)<sup>[9]</sup>

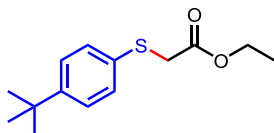

Colorless oil; yield: 56.8 mg (75%).

$^1\text{H}$  NMR (600 MHz,  $\text{CDCl}_3$ ):  $\delta$  = 7.35 (dd,  $J$  = 7.8, 1.8 Hz, 2H), 7.32 (dd,  $J$  = 7.8, 1.8 Hz, 2H), 4.15 (q,  $J$  = 7.2 Hz, 2H), 3.59 (s, 2H), 1.29 (s, 9H), 1.21 (t,  $J$  = 7.2 Hz, 3H).

$^{13}\text{C}$  NMR (150 MHz,  $\text{CDCl}_3$ ):  $\delta$  = 169.8, 150.4, 131.3, 130.4, 126.0, 61.4, 37.1, 34.5, 31.2, 14.0.

#### 5) Ethyl 2-((4-methoxyphenyl)thio)acetate (3ea)<sup>[8]</sup>

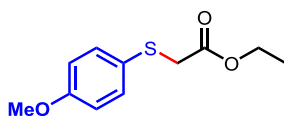

Colorless oil; yield: 64.5 mg (95%).

$^1\text{H}$  NMR (600 MHz,  $\text{CDCl}_3$ ):  $\delta$  = 7.40 (dd,  $J$  = 6.6, 2.4 Hz, 2H), 6.83 (dd,  $J$  = 6.6, 2.4 Hz, 2H), 4.12 (q,  $J$  = 7.2 Hz, 2H), 3.77 (s, 3H), 3.49 (s, 2H), 1.20 (t,  $J$  = 7.2 Hz, 3H).

$^{13}\text{C}$  NMR (150 MHz,  $\text{CDCl}_3$ ):  $\delta$  = 169.8, 159.6, 134.1, 124.9, 114.6, 61.3, 55.2, 38.6, 14.0.

HRMS (ESI):  $m/z$  [ $\text{M}+\text{H}$ ]<sup>+</sup> calcd for  $\text{C}_{11}\text{H}_{15}\text{O}_3\text{S}^+$ : 227.0736; found: 227.0739.

#### 6) Ethyl 2-((4-fluorophenyl)thio)acetate (3fa)<sup>[9]</sup>

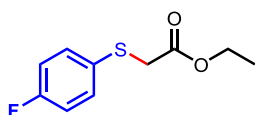

Colorless oil; yield: 54.6 mg (85%).

$^1\text{H}$  NMR (600 MHz,  $\text{CDCl}_3$ ):  $\delta$  = 7.42 (dd,  $J$  = 9.0, 5.4 Hz, 2H), 6.99 (t,  $J$  = 9.0 Hz, 2H), 4.13 (q,  $J$  = 7.2 Hz, 2H), 3.54 (s, 2H), 1.20 (t,  $J$  = 7.2 Hz, 3H).

$^{13}\text{C}$  NMR (150 MHz,  $\text{CDCl}_3$ ):  $\delta$  = 169.8, 162.4 (d,  $J$  = 246.15 Hz), 133.4 (d,  $J$  = 8.1 Hz), 129.7 (d,  $J$  = 3.3 Hz), 116.1 (d,  $J$  = 2.75 Hz), 61.5, 37.8, 14.1.

HRMS (ESI):  $m/z$   $[M+H]^+$  calcd for  $C_{10}H_{12}FO_2S^+$ : 215.0537; found: 215.0533.

**7) Ethyl 2-((4-(trifluoromethyl)phenyl)thio)acetate (3ga)**<sup>[8]</sup>

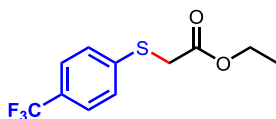

Colorless oil; yield: 47.6 mg (60%).

$^1H$  NMR (600 MHz,  $CDCl_3$ ):  $\delta$  = 7.42 (dd,  $J$  = 9.0, 5.4 Hz, 2H), 6.99 (t,  $J$  = 9.0 Hz, 2H), 4.13 (q,  $J$  = 7.2 Hz, 2H), 3.54 (s, 2H), 1.20 (t,  $J$  = 7.2 Hz, 3H).

$^{13}C$  NMR (150 MHz,  $CDCl_3$ ):  $\delta$  = 169.1, 140.5, 134.9, 128.4 (q,  $J$  = 32.4 Hz), 128.1, 125.8 (q,  $J$  = 3.9 Hz), 124.0 (q,  $J$  = 240.3 Hz), 61.8, 35.4, 14.0.

**8) Ethyl 2-(*m*-tolylthio)acetate (3ha)**<sup>[8]</sup>

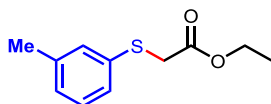

Colorless oil; yield: 55.5 mg (88%).

$^1H$  NMR (600 MHz,  $CDCl_3$ ):  $\delta$  = 7.22 (m, 3H), 7.02 (d,  $J$  = 7.2 Hz, 1H), 4.16 (q,  $J$  = 7.2 Hz, 2H), 3.61 (s, 2H), 2.31 (s, 3H), 1.22 (t,  $J$  = 7.2 Hz, 3H).

$^{13}C$  NMR (150 MHz,  $CDCl_3$ ):  $\delta$  = 169.7, 138.7, 134.7, 130.5, 128.8, 127.7, 126.9, 61.4, 36.6, 21.2, 14.0.

HRMS (ESI):  $m/z$   $[M+H]^+$  calcd for  $C_{11}H_{15}O_2S^+$ : 211.0787; found: 211.0790.

**9) Ethyl 2-((3-methoxyphenyl)thio)acetate (3ia)**<sup>[8]</sup>

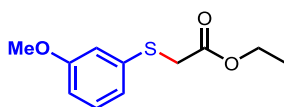

Colorless oil; yield: 56.3 mg (83%).

$^1H$  NMR (600 MHz,  $CDCl_3$ ):  $\delta$  = 7.19 (t,  $J$  = 8.4 Hz, 1H), 6.97–6.95 (m, 2H), 6.75 (dd,  $J$  = 8.4, 2.4 Hz, 1H), 4.16 (q,  $J$  = 7.2 Hz, 2H), 3.78 (s, 3H), 3.63 (s, 2H), 1.22 (t,  $J$  = 7.2 Hz, 3H).

$^{13}C$  NMR (150 MHz,  $CDCl_3$ ):  $\delta$  = 169.6, 159.8, 136.3, 129.8, 121.7, 114.8, 112.7, 61.5, 55.2, 36.5, 14.1.

HRMS (ESI):  $m/z$   $[M+H]^+$  calcd for  $C_{11}H_{15}O_3S^+$ : 227.0736; found: 227.0739.

**10) Ethyl 2-((3-bromophenyl)thio)acetate (3ja)**<sup>[10]</sup>

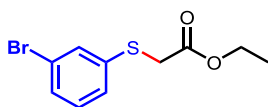

Colorless oil; yield: 63.6 mg (77%).

$^1\text{H}$  NMR (600 MHz,  $\text{CDCl}_3$ ):  $\delta$  = 7.54 (t,  $J$  = 1.8 Hz, 1H), 7.34–7.30 (m, 2H), 7.15 (t,  $J$  = 8.4 Hz, 1H), 4.17 (q,  $J$  = 7.2 Hz, 2H), 3.63 (s, 2H), 1.23 (t,  $J$  = 7.2 Hz, 3H).

$^{13}\text{C}$  NMR (150 MHz,  $\text{CDCl}_3$ ):  $\delta$  = 169.2, 137.4, 132.0, 130.3, 129.8, 128.0, 122.8, 61.7, 36.3, 14.1.

### 11) Ethyl 2-((3-fluorophenyl)thio)acetate (3ka)<sup>[9]</sup>

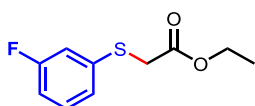

Colorless oil; yield: 48.9 mg (76%).

$^1\text{H}$  NMR (400 MHz,  $\text{CDCl}_3$ ):  $\delta$  = 7.44 (dd,  $J$  = 8.8, 5.2 Hz, 2H), 7.00 (t,  $J$  = 8.8 Hz, 2H), 4.22 (q,  $J$  = 7.2 Hz, 2H), 3.56 (s, 2H), 1.22 (t,  $J$  = 7.2 Hz, 3H).

$^{13}\text{C}$  NMR (100 MHz,  $\text{CDCl}_3$ ):  $\delta$  = 169.7, 163.6, 161.1, 133.4 (d,  $J$  = 8.2 Hz), 129.7, 116.2, 116.0, 61.5, 37.8, 14.0

HRMS (ESI):  $m/z$   $[\text{M}+\text{H}]^+$  calcd for  $\text{C}_{10}\text{H}_{12}\text{FO}_2\text{S}^+$ : 215.0537; found: 215.0533.

### 12) Ethyl 2-((2-fluorophenyl)thio)acetate (3la)

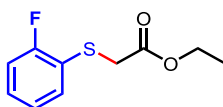

Colorless oil; yield: 59.1 mg (92%).

$^1\text{H}$  NMR (600 MHz,  $\text{CDCl}_3$ ):  $\delta$  = 7.47–7.44 (m, 1H), 7.28–7.24 (m, 1H), 7.10–7.05 (m, 2H), 4.12 (q,  $J$  = 7.2 Hz, 2H), 3.60 (s, 2H), 1.18 (t,  $J$  = 7.2 Hz, 3H).

$^{13}\text{C}$  NMR (150 MHz,  $\text{CDCl}_3$ ):  $\delta$  = 169.3, 161.8 (d,  $J$  = 245.1 Hz), 133.4 (d,  $J$  = 1.35 Hz), 129.6 (d,  $J$  = 7.8 Hz), 124.5 (d,  $J$  = 3.75 Hz), 121.4 (d,  $J$  = 17.55 Hz), 115.8 (d,  $J$  = 22.35 Hz), 61.5, 36.0, 14.0.

HRMS (ESI):  $m/z$   $[\text{M}+\text{H}]^+$  calcd for  $\text{C}_{10}\text{H}_{12}\text{FO}_2\text{S}^+$ : 215.0537; found: 215.0533.

### 13) Ethyl 2-((2-chlorophenyl)thio)acetate (3ma)<sup>[9]</sup>

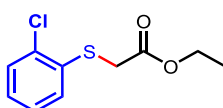

Colorless oil; yield: 56.8 mg (82%).

$^1\text{H}$  NMR (600 MHz,  $\text{CDCl}_3$ ):  $\delta$  = 7.41–7.36 (m, 2H), 7.23–7.20 (m, 1H), 7.17–7.14 (m, 1H), 4.16 (q,  $J$  = 7.2 Hz, 2H), 3.67 (s, 2H), 1.22 (t,  $J$  = 7.2 Hz, 3H).

$^{13}\text{C}$  NMR (150 MHz,  $\text{CDCl}_3$ ):  $\delta$  = 169.1, 134.2, 134.1, 130.0, 129.8, 127.7, 127.2, 61.7, 35.2, 14.0.

#### 14) Ethyl 2-((2-bromophenyl)thio)acetate (3na)<sup>[10]</sup>

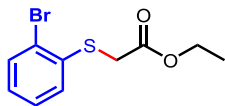

Colorless oil; yield: 59.4 mg (72%).

$^1\text{H}$  NMR (600 MHz,  $\text{CDCl}_3$ ):  $\delta$  = 7.55 (dd,  $J$  = 7.8, 1.2 Hz, 1H), 7.38 (dd,  $J$  = 7.8, 1.8 Hz, 1H), 7.27 (dd,  $J$  = 7.2, 1.2 Hz, 1H), 7.08–7.05 (m, 1H), 4.17 (q,  $J$  = 7.2 Hz, 2H), 3.67 (s, 2H), 1.23 (t,  $J$  = 7.2 Hz, 3H).

$^{13}\text{C}$  NMR (150 MHz,  $\text{CDCl}_3$ )  $\delta$  = 169.1, 134.3, 133.1, 129.5, 127.9, 127.7, 124.2, 61.7, 35.6, 14.1.

#### 15) Ethyl 2-((3,4-dimethylphenyl)thio)acetate (3oa)

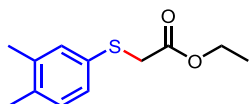

Colorless oil; yield: 57.9 mg (86%).

$^1\text{H}$  NMR (600 MHz,  $\text{CDCl}_3$ ):  $\delta$  = 7.21 (br, 1H), 7.17–7.16 (m, 1H), 7.06 (d,  $J$  = 7.8 Hz, 1H), 4.15 (q,  $J$  = 7.2 Hz, 2H), 3.57 (s, 2H), 2.23 (s, 3H), 2.22 (s, 3H), 1.22 (t,  $J$  = 7.2 Hz, 3H).

$^{13}\text{C}$  NMR (150 MHz,  $\text{CDCl}_3$ ):  $\delta$  = 169.9, 137.4, 136.0, 132.1, 131.3, 130.3, 128.3, 61.4, 37.4, 19.7, 19.4, 14.1.

HRMS (ESI):  $m/z$   $[\text{M}+\text{H}]^+$  calcd for  $\text{C}_{12}\text{H}_{16}\text{NaO}_2\text{S}^+$ : 247.0763; found: 247.0761.

#### 16) Ethyl 2-((2,4-dimethylphenyl)thio)acetate (3pa)<sup>[9]</sup>

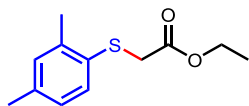

Colorless oil; yield: 61.9 mg (92%).

$^1\text{H}$  NMR (600 MHz,  $\text{CDCl}_3$ ):  $\delta$  = 7.29 (d,  $J$  = 8.4 Hz, 1H), 7.01 (s, 1H), 6.96 (d,  $J$  = 7.8 Hz, 1H), 4.13 (q,  $J$  = 7.2 Hz, 2H), 3.54 (s, 2H), 2.40 (s, 3H), 2.28 (s, 3H), 1.21 (t,  $J$  = 7.2 Hz, 3H).

$^{13}\text{C}$  NMR (150 MHz,  $\text{CDCl}_3$ ):  $\delta = 169.7, 139.0, 137.3, 131.2, 131.1, 130.2, 127.3, 61.4, 36.6, 20.9, 20.3, 14.0$ .

HRMS (ESI):  $m/z$   $[\text{M}+\text{H}]^+$  calcd for  $\text{C}_{12}\text{H}_{16}\text{NaO}_2\text{S}^+$ : 247.0763; found: 247.0761.

### 17) Ethyl 2-((2,4-dichlorophenyl)thio)acetate (3qa)

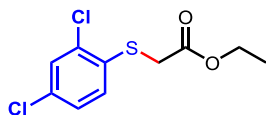

Colorless oil; yield: 70.0 mg (88%).

$^1\text{H}$  NMR (600 MHz,  $\text{CDCl}_3$ ):  $\delta = 7.40$  (d,  $J = 8.4$  Hz, 1H), 7.35 (d,  $J = 8.4$  Hz, 1H), 7.20 (dd,  $J = 8.4, 2.4$  Hz, 1H), 4.16 (q,  $J = 7.2$  Hz, 2H), 3.64 (s, 2H), 1.23 (t,  $J = 7.2$  Hz, 3H).

$^{13}\text{C}$  NMR (150 MHz,  $\text{CDCl}_3$ ):  $\delta = 168.9, 135.2, 133.2, 132.8, 131.1, 129.6, 127.5, 61.8, 35.3, 14.1$ .

HRMS (ESI):  $m/z$   $[\text{M}+\text{H}]^+$  calcd for  $\text{C}_{10}\text{H}_{11}\text{Cl}_2\text{O}_2\text{S}^+$ : 264.9851; found: 264.9853.

### 18) Ethyl 2-(pyridin-2-ylthio)acetate (3ra)<sup>[9]</sup>

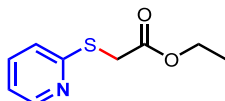

Colorless oil; yield: 48.5 mg (82%).

$^1\text{H}$  NMR (600 MHz,  $\text{CDCl}_3$ ):  $\delta = 8.37$  (dd,  $J = 4.8, 1.2$  Hz, 1H), 7.48–7.45 (m, 1H), 7.21 (d,  $J = 8.4$  Hz, 1H), 6.98–6.96 (m, 1H), 4.18 (q,  $J = 7.2$  Hz, 2H), 3.96 (s, 2H), 1.24 (t,  $J = 7.2$  Hz, 3H).

$^{13}\text{C}$  NMR (150 MHz,  $\text{CDCl}_3$ ):  $\delta = 169.7, 156.9, 149.3, 136.0, 121.9, 119.7, 61.5, 32.3, 14.1$ .

HRMS (ESI):  $m/z$   $[\text{M}+\text{H}]^+$  calcd for  $\text{C}_9\text{H}_{12}\text{NO}_2\text{S}^+$ : 198.0583; found: 198.0586.

### 19) Ethyl 2-((5-nitropyridin-2-yl)thio)acetate (3sa)

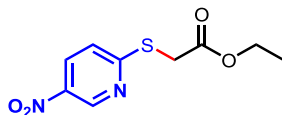

Colorless oil; yield: 63.2 mg (87%).

$^1\text{H}$  NMR (600 MHz,  $\text{CDCl}_3$ ):  $\delta = 9.19$  (d,  $J = 2.4$  Hz, 1H), 8.25 (dd,  $J = 9.0, 3.0$  Hz, 1H), 7.36 (d,  $J = 9.0$  Hz, 1H), 4.21 (q,  $J = 7.2$  Hz, 2H), 4.03 (s, 2H), 1.27 (t,  $J = 7.2$  Hz, 3H).

$^{13}\text{C}$  NMR (150 MHz,  $\text{CDCl}_3$ ):  $\delta = 168.5, 165.4, 114.9, 130.6, 121.3, 61.9, 32.7, 14.1$ .

HRMS (ESI):  $m/z$   $[\text{M}+\text{H}]^+$  calcd for  $\text{C}_9\text{H}_{11}\text{N}_2\text{O}_4\text{S}^+$ : 243.0434; found: 243.0435.



## 20) Ethyl 2-(pyrimidin-2-ylthio)acetate (3ta)

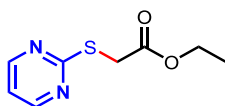

Colorless oil; yield: 53.5 mg (90%).

$^1\text{H}$  NMR (600 MHz,  $\text{CDCl}_3$ ):  $\delta$  = 8.49 (d,  $J$  = 4.8 Hz, 2H), 6.96 (t,  $J$  = 4.8 Hz, 1H), 4.19 (q,  $J$  = 7.2 Hz, 2H), 3.91 (s, 2H), 1.24 (t,  $J$  = 7.2 Hz, 3H).

$^{13}\text{C}$  NMR (150 MHz,  $\text{CDCl}_3$ ):  $\delta$  = 170.8, 169.1, 157.2, 116.8, 61.6, 33.4, 14.1.

HRMS (ESI):  $m/z$   $[\text{M}+\text{H}]^+$  calcd for  $\text{C}_8\text{H}_{11}\text{N}_2\text{O}_2\text{S}^+$ : 199.0536; found: 199.0537.

## 21) Ethyl 2-((4,6-dimethylpyrimidin-2-yl)thio)acetate (3ua)<sup>[11]</sup>

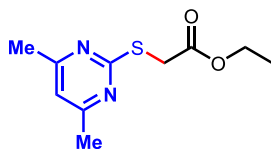

Colorless oil; yield: 63.1 mg (93%).

$^1\text{H}$  NMR (600 MHz,  $\text{CDCl}_3$ ):  $\delta$  = 6.96 (s, 1H), 4.19 (q,  $J$  = 7.2 Hz, 2H), 3.90 (s, 2H), 2.37 (s, 6H), 1.26 (t,  $J$  = 7.2 Hz, 3H).

$^{13}\text{C}$  NMR (150 MHz,  $\text{CDCl}_3$ ):  $\delta$  = 169.5, 169.4, 167.0, 115.9, 61.4, 33.5, 23.7, 14.2.

## 22) Ethyl 2-(benzo[d]oxazol-2-ylthio)acetate (3va)

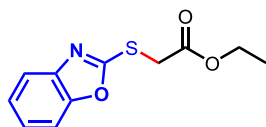

Colorless oil; yield: 34.2 mg (48%).

$^1\text{H}$  NMR (600 MHz,  $\text{CDCl}_3$ ):  $\delta$  = 7.59–7.58 (m, 1H), 7.44–7.43 (m, 1H), 7.29–7.26 (m, 1H), 7.24–7.23 (m, 1H), 4.25 (q,  $J$  = 7.2 Hz, 2H), 4.11 (s, 2H), 1.28 (t,  $J$  = 7.2 Hz, 3H).

$^{13}\text{C}$  NMR (150 MHz,  $\text{CDCl}_3$ ):  $\delta$  = 167.9, 163.3, 152.1, 141.7, 124.4, 124.1, 118.6, 110.0, 62.2, 34.2, 14.1.

HRMS (ESI):  $m/z$   $[\text{M}+\text{H}]^+$  calcd for  $\text{C}_{11}\text{H}_{12}\text{NO}_3\text{S}^+$ : 238.0532; found: 238.0535.

## 23) Ethyl 2-(benzo[d]thiazol-2-ylthio)acetate (3wa)

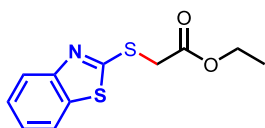

Colorless oil; yield: 47.9 mg (63%).

$^1\text{H}$  NMR (600 MHz,  $\text{CDCl}_3$ ):  $\delta$  = 7.84 (d,  $J$  = 7.8 Hz, 1H), 7.74 (d,  $J$  = 7.8 Hz, 1H), 7.41–7.39 (m, 1H), 7.30–7.28 (m, 1H), 4.24 (q,  $J$  = 7.2 Hz, 2H), 4.16 (s, 2H), 1.28 (t,  $J$  = 7.2 Hz, 3H).

$^{13}\text{C}$  NMR (150 MHz,  $\text{CDCl}_3$ ):  $\delta$  = 168.2, 164.7, 152.9, 135.5, 126.0, 124.4, 121.7, 121.0, 62.0, 35.1, 14.1.

HRMS (ESI):  $m/z$   $[\text{M}+\text{H}]^+$  calcd for  $\text{C}_{11}\text{H}_{12}\text{NO}_2\text{S}_2^+$ : 254.0304; found: 254.0307.

#### 24) Ethyl 2-(thiophen-2-ylthio)acetate (3xa)<sup>[9]</sup>

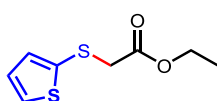

Colorless oil; yield: 48.5 mg (80%).

$^1\text{H}$  NMR (600 MHz,  $\text{CDCl}_3$ ):  $\delta$  = 7.37 (dd,  $J$  = 5.4, 1.2 Hz, 1H), 7.20 (dd,  $J$  = 3.6, 1.2 Hz, 1H), 6.97 (dd,  $J$  = 5.4, 3.6 Hz, 1H), 4.16 (q,  $J$  = 7.2 Hz, 2H), 3.49 (s, 2H), 1.24 (t,  $J$  = 7.2 Hz, 3H).

$^{13}\text{C}$  NMR (150 MHz,  $\text{CDCl}_3$ ):  $\delta$  = 169.3, 135.0, 132.4, 130.5, 127.6, 61.5, 41.0, 14.1.

HRMS (ESI):  $m/z$   $[\text{M}+\text{H}]^+$  calcd for  $\text{C}_8\text{H}_{11}\text{O}_2\text{S}_2^+$ : 203.0195; found: 203.0197.

#### 25) Methyl 2-((4-methoxyphenyl)thio)-2-phenylacetate (3eb)<sup>[12]</sup>

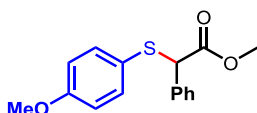

Colorless oil; yield: 61.4 mg (71%).

$^1\text{H}$  NMR (600 MHz,  $\text{CDCl}_3$ ):  $\delta$  = 7.39–7.38 (m, 2H), 7.32–7.28 (m, 5H), 6.80–6.77 (m, 2H), 4.76 (s, 1H), 3.78 (s, 3H), 3.66 (s, 3H).

$^{13}\text{C}$  NMR (150 MHz,  $\text{CDCl}_3$ ):  $\delta$  = 171.0, 160.2, 136.2, 135.8, 128.5, 128.1, 123.6, 114.5, 110.0, 57.4, 55.3, 52.5.

HRMS (ESI):  $m/z$   $[\text{M}+\text{H}]^+$  calcd for  $\text{C}_{16}\text{H}_{17}\text{O}_3\text{S}^+$ : 289.0893; found: 289.0896.

#### 26) Isopropyl 2-((4-methoxyphenyl)thio)-2-phenylacetate (3ec)

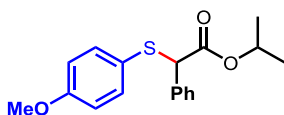

Colorless oil; yield: 74.0 mg (78%).

$^1\text{H}$  NMR (600 MHz,  $\text{CDCl}_3$ ):  $\delta$  = 7.40 (d,  $J$  = 7.2 Hz, 2H), 7.33–7.27 (m, 5H), 6.78 (d,  $J$  = 8.4 Hz, 2H), 4.98–4.94 (m, 1H), 4.72 (s, 1H), 3.78 (s, 3H), 1.14 (t,  $J$  = 7.2 Hz, 6H).

$^{13}\text{C}$  NMR (150 MHz,  $\text{CDCl}_3$ ):  $\delta$  = 170.0, 160.1, 136.1, 136.0, 128.6, 128.5, 128.0, 123.9, 114.4, 69.2, 57.5, 55.3, 21.6, 21.5.

HRMS (ESI):  $m/z$   $[\text{M}+\text{H}]^+$  calcd for  $\text{C}_{18}\text{H}_{21}\text{O}_3\text{S}^+$ : 317.1206; found: 317.1208.

### 27) Isopropyl 2-((4-methoxyphenyl)thio)-2-(*p*-tolyl)acetate (3ed)

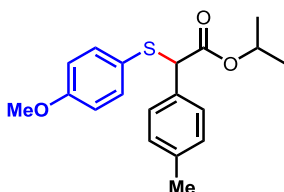

Colorless oil; yield: 75.3 mg (76%).

$^1\text{H}$  NMR (600 MHz,  $\text{CDCl}_3$ ):  $\delta$  = 7.35 (d,  $J$  = 8.4 Hz, 2H), 7.31 (d,  $J$  = 7.8 Hz, 2H), 7.11 (d,  $J$  = 8.4 Hz, 2H), 6.79 (d,  $J$  = 8.4 Hz, 2H), 4.98–4.94 (m, 1H), 4.71 (s, 1H), 3.77 (s, 3H), 2.32 (s, 3H), 1.15 (d,  $J$  = 6.6 Hz, 3H), 1.14 (d,  $J$  = 6.0 Hz, 3H).

$^{13}\text{C}$  NMR (150 MHz,  $\text{CDCl}_3$ ):  $\delta$  = 170.1, 160.0, 137.8, 135.8, 132.9, 129.1, 128.4, 124.3, 114.4, 69.0, 57.2, 55.2, 21.6, 21.5, 21.1.

HRMS (ESI):  $m/z$   $[\text{M}+\text{H}]^+$  calcd for  $\text{C}_{19}\text{H}_{23}\text{O}_3\text{S}^+$ : 331.1362; found: 331.1364.

### 28) Isopropyl 2-(4-methoxyphenyl)-2-((4-methoxyphenyl)thio)acetate (3ee)

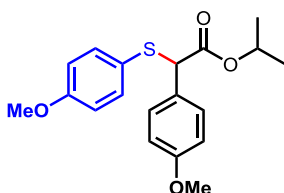

Colorless oil; yield: 85.1 mg (82%).

$^1\text{H}$  NMR (600 MHz,  $\text{CDCl}_3$ ):  $\delta$  = 7.35–7.26 (m, 4H), 6.85–6.82 (m, 2H), 6.80–6.78 (m, 2H), 4.98–4.92 (m, 1H), 4.70 (s, 1H), 3.78 (d,  $J$  = 6.6 Hz, 6H), 1.14 (dd,  $J$  = 12.6, 6.3 Hz, 6H).

$^{13}\text{C}$  NMR (150 MHz,  $\text{CDCl}_3$ ):  $\delta$  = 170.2, 160.0, 159.4, 136.0, 129.7, 127.9, 124.0, 114.4, 113.9, 69.0, 56.8, 55.3, 55.2, 21.7, 21.6.

HRMS (ESI):  $m/z$   $[\text{M}+\text{H}]^+$  calcd for  $\text{C}_{19}\text{H}_{23}\text{O}_4\text{S}^+$ : 347.1312; found: 347.1314.

### 29) Isopropyl 2-(4-fluorophenyl)-2-((4-methoxyphenyl)thio)acetate (3ef)

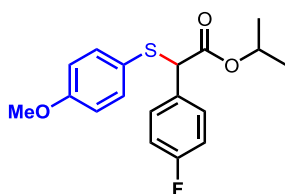

Colorless oil; yield: 68.2 mg (68%).

$^1\text{H}$  NMR (600 MHz,  $\text{CDCl}_3$ ):  $\delta$  = 7.37–7.35 (m, 2H), 7.31–7.29 (m, 2H), 6.97 (t,  $J$  = 9.0 Hz, 2H), 6.78 (d,  $J$  = 9.0 Hz, 2H), 4.98–4.94 (m, 1H), 4.69 (s, 1H), 3.77 (s, 3H), 1.15 (d,  $J$  = 7.2 Hz, 6H).

$^{13}\text{C}$  NMR (150 MHz,  $\text{CDCl}_3$ ):  $\delta$  = 169.8, 162.5 (d,  $J$  = 245.7 Hz), 160.3, 136.2, 131.9 (d,  $J$  = 3.15 Hz), 130.3 (d,  $J$  = 33.0 Hz), 123.6, 115.3 (d,  $J$  = 21.45 Hz), 114.5, 69.3, 56.7, 55.3, 21.5.

$^{19}\text{F}$  NMR (287 MHz,  $\text{CDCl}_3$ ):  $\delta$  = -114.277—-114.314 (m).

HRMS (ESI):  $m/z$   $[\text{M}+\text{H}]^+$  calcd for  $\text{C}_{18}\text{H}_{20}\text{FO}_3\text{S}^+$ : 335.1112; found: 335.1114.

### 30) Isopropyl 2-(4-chlorophenyl)-2-((4-methoxyphenyl)thio)acetate (3eg)

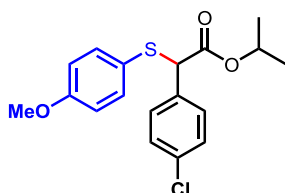

Colorless oil; yield: 73.7 mg (70%).

$^1\text{H}$  NMR (600 MHz,  $\text{CDCl}_3$ ):  $\delta$  = 7.33–7.29 (m, 4H), 7.25 (d,  $J$  = 8.4 Hz, 2H), 6.78 (d,  $J$  = 8.4 Hz, 2H), 5.00–4.93 (m, 1H), 4.67 (s, 1H), 3.77 (s, 3H), 1.15 (d,  $J$  = 6.0 Hz, 6H).

$^{13}\text{C}$  NMR (150 MHz,  $\text{CDCl}_3$ ):  $\delta$  = 169.6, 160.3, 136.2, 134.7, 133.9, 129.9, 128.6, 123.4, 114.5, 69.3, 56.8, 55.3, 21.5.

HRMS (ESI):  $m/z$   $[\text{M}+\text{H}]^+$  calcd for  $\text{C}_{18}\text{H}_{20}\text{ClO}_3\text{S}^+$ : 351.0816; found: 351.0820.

### 31) Isopropyl 2-(4-bromophenyl)-2-((4-methoxyphenyl)thio)acetate (3eh)

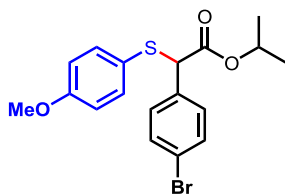

Colorless oil; yield: 77.1 mg (65%).

$^1\text{H}$  NMR (600 MHz,  $\text{CDCl}_3$ ):  $\delta$  = 7.32–7.29 (m, 4H), 7.26 (d,  $J$  = 9.0 Hz, 2H), 6.78 (d,  $J$  = 8.4 Hz, 2H), 4.98–4.94 (m, 1H), 4.67 (s, 1H), 3.77 (s, 3H), 1.15 (d,  $J$  = 6.0 Hz, 6H).

$^{13}\text{C}$  NMR (150 MHz,  $\text{CDCl}_3$ ):  $\delta$  = 169.6, 160.3, 136.3, 134.6, 133.9, 129.9, 128.6, 123.4, 114.5, 69.4, 56.7, 55.3, 21.5.

HRMS (ESI):  $m/z$   $[\text{M}+\text{H}]^+$  calcd for  $\text{C}_{18}\text{H}_{20}\text{BrO}_3\text{S}^+$ : 395.0311; found: 395.0312.

### 32) Isopropyl 2-((4-methoxyphenyl)thio)-2-(4-(trifluoromethyl)phenyl)acetate (3ei)

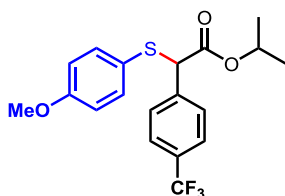

Colorless oil; yield: 69.2 mg (60%).

$^1\text{H}$  NMR (600 MHz,  $\text{CDCl}_3$ ):  $\delta$  = 7.55 (d,  $J$  = 7.8 Hz, 2H), 7.49 (d,  $J$  = 8.4 Hz, 2H), 7.31–7.28 (m, 2H), 6.78 (dd,  $J$  = 7.2, 2.4 Hz, 2H), 5.00–4.95 (m, 1H), 4.72 (m, 1H), 3.78 (s, 3H), 1.16 (d,  $J$  = 3.6 Hz, 3H), 1.15 (d,  $J$  = 3.0 Hz, 3H).

$^{13}\text{C}$  NMR (150 MHz,  $\text{CDCl}_3$ ):  $\delta$  = 169.4, 160.4, 140.1, 136.4, 130.3, 130.0, 128.9, 125.4 (t,  $J$  = 3.8 Hz), 124.9, 123.1 (d,  $J$  = 9.0 Hz), 114.5, 69.6, 57.0, 55.3, 21.5.

HRMS (ESI):  $m/z$   $[\text{M}+\text{H}]^+$  calcd for  $\text{C}_{19}\text{H}_{20}\text{F}_3\text{O}_3\text{S}^+$ : 385.1080; found: 385.1081.

### 33) Isopropyl 2-((4-methoxyphenyl)thio)-2-(*o*-tolyl)acetate (3ej)

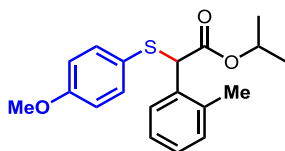

Colorless oil; yield: 71.3 mg (72%).

$^1\text{H}$  NMR (400 MHz,  $\text{CDCl}_3$ ):  $\delta$  = 7.56–7.52 (m, 1H), 7.38–7.34 (m, 2H), 7.19–7.13 (m, 3H), 6.8–6.77 (m, 2H), 5.03–4.94 (m, 2H), 3.78 (s, 3H), 2.34 (s, 3H), 1.14 (dd,  $J$  = 6.4, 1.2 Hz, 6H).

$^{13}\text{C}$  NMR (100 MHz,  $\text{CDCl}_3$ ):  $\delta$  = 170.3, 160.0, 136.1, 136.0, 134.2, 130.4, 128.2, 127.8, 126.3, 124.0, 114.3, 69.1, 55.3, 53.8, 21.5, 21.4, 19.5.

HRMS (ESI):  $m/z$   $[\text{M}+\text{H}]^+$  calcd for  $\text{C}_{19}\text{H}_{23}\text{O}_3\text{S}^+$ : 331.1362; found: 331.1364.

### 34) Isopropyl 2-(2-bromophenyl)-2-((4-methoxyphenyl)thio)acetate (3ek)

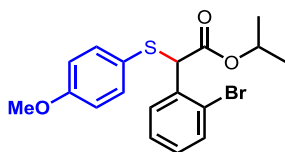

Colorless oil; yield: 85.4 mg (72%).

$^1\text{H}$  NMR (600 MHz,  $\text{CDCl}_3$ ):  $\delta$  = 7.64 (dd,  $J$  = 8.1, 1.5 Hz, 1H), 7.53 (dd,  $J$  = 7.8, 1.2 Hz, 1H), 7.39–7.36 (m, 2H), 7.29–7.26 (m, 1H), 7.14–7.11 (m, 1H), 6.80–6.78 (m, 2H), 5.28 (s, 1H), 5.01–4.97 (m, 1H), 3.78 (s, 3H), 1.17 (s, 3H), 1.16 (s, 3H).

$^{13}\text{C}$  NMR (150 MHz,  $\text{CDCl}_3$ ):  $\delta$  = 169.6, 160.2, 136.3, 135.5, 132.8, 130.2, 129.3, 127.6, 124.5, 123.9, 114.4, 69.4, 55.9, 55.3, 21.6, 21.5.

HRMS (ESI):  $m/z$   $[\text{M}+\text{H}]^+$  calcd for  $\text{C}_{18}\text{H}_{20}\text{BrO}_3\text{S}^+$ : 395.0311; found: 395.0312.

### 35) Isopropyl 2-(3-fluorophenyl)-2-((4-methoxyphenyl)thio)acetate (3el)

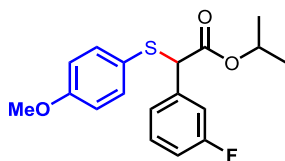

Colorless oil; yield: 66.2 mg (66%).

$^1\text{H}$  NMR (600 MHz,  $\text{CDCl}_3$ ):  $\delta$  = 7.32–7.30 (m, 2H), 7.25–7.22 (m, 1H), 7.17–7.12 (m, 2H), 6.98–6.95 (m, 1H), 6.80–6.77 (m, 2H), 4.99–4.95 (m, 1H), 4.68 (s, 1H), 3.77 (s, 3H), 1.16 (d,  $J$  = 6.0 Hz, 3H), 1.15 (d,  $J$  = 6.0 Hz, 3H).

$^{13}\text{C}$  NMR (150 MHz,  $\text{CDCl}_3$ ):  $\delta$  = 169.5, 162.6 (d,  $J$  = 244.95 Hz), 160.3, 138.4 (d,  $J$  = 7.5 Hz), 136.2, 129.8 (d,  $J$  = 8.25 Hz), 124.3 (d,  $J$  = 2.7 Hz), 123.3, 115.6 (d,  $J$  = 22.8 Hz), 115.0 (d,  $J$  = 21.0 Hz), 114.5, 69.4, 57.0, 56.9, 55.3, 21.5.

$^{19}\text{F}$  NMR (287 MHz,  $\text{CDCl}_3$ ):  $\delta$  = -113.006—-113.070 (m).

HRMS (ESI):  $m/z$   $[\text{M}+\text{H}]^+$  calcd for  $\text{C}_{18}\text{H}_{20}\text{FO}_3\text{S}^+$ : 335.1112; found: 335.1113.

### 36) Isopropyl 2-(3-chlorophenyl)-2-((4-methoxyphenyl)thio)acetate (3em)

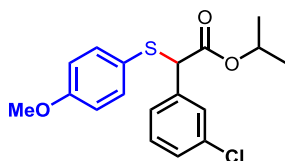

Colorless oil; yield: 82.1 mg (78%).

$^1\text{H}$  NMR (600 MHz,  $\text{CDCl}_3$ ):  $\delta$  = 7.39 (t,  $J$  = 1.8 Hz, 1H), 7.34–7.28 (m, 2H), 7.27–7.23 (m, 2H), 7.23–7.19 (m, 1H), 6.83–6.76 (m, 2H), 4.99–4.94 (m, 1H), 4.65 (s, 1H), 3.77 (s, 3H), 1.15 (dd,  $J$  = 8.7, 6.3 Hz, 6H).

$^{13}\text{C}$  NMR (150 MHz,  $\text{CDCl}_3$ ):  $\delta$  = 169.5, 160.3, 138.0, 136.3, 134.2, 129.6, 128.7, 128.2, 126.8, 123.2, 114.5, 69.4, 56.9, 55.3, 21.6, 21.5.

HRMS (ESI):  $m/z$   $[M+H]^+$  calcd for  $C_{18}H_{20}ClO_3S^+$ : 351.0816; found: 351.0819.

### 37) Isopropyl 2-(2,5-difluorophenyl)-2-((4-methoxyphenyl)thio)acetate (3en)

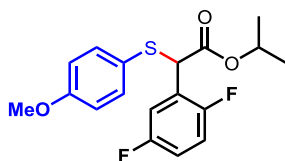

Colorless oil; yield: 70.8 mg (67%).

$^1H$  NMR (600 MHz,  $CDCl_3$ ):  $\delta$  = 7.34–7.28 (m, 3H), 6.97–6.91 (m, 2H), 6.79 (d,  $J$  = 9.0 Hz, 2H), 5.01 (s, 1H), 5.00–4.96 (m, 2H), 3.77 (s, 3H), 1.18 (d,  $J$  = 2.4 Hz, 3H), 1.17 (d,  $J$  = 3.0 Hz, 3H).

$^{13}C$  NMR (150 MHz,  $CDCl_3$ ):  $\delta$  = 169.0, 160.5, 158.4 (dd,  $J$  = 241.05, 2.4 Hz), 155.0 (dd,  $J$  = 242.4, 2.55 Hz), 136.5, 125.2 (q,  $J$  = 6.6 Hz), 122.7, 116.7 (dd,  $J$  = 25.5, 3.15 Hz), 116.1 (dd,  $J$  = 51.45, 8.55 Hz), 116.0 (dd,  $J$  = 8.55, 2.1 Hz), 114.5, 69.6, 55.3, 48.8, 21.5.

$^{19}F$  NMR (287 MHz,  $CDCl_3$ ):  $\delta$  = -118.312—-118.393 (m), -123.948—-124.044 (m).

HRMS (ESI):  $m/z$   $[M+Na]^+$  calcd for  $C_{18}H_{18}F_2NaO_3S^+$ : 375.0837; found: 375.0834.

### 38) Cyclopentyl 2-((4-methoxyphenyl)thio)-2-phenylacetate (3eo)

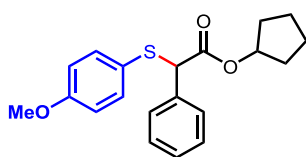

Colorless oil; yield: 67.8 mg (66%).

$^1H$  NMR (600 MHz,  $CDCl_3$ ):  $\delta$  = 7.41–7.39 (m, 2H), 7.33–7.25 (m, 5H), 6.80–6.77 (m, 2H), 5.13–5.10 (m, 1H), 4.71 (s, 1H), 3.78 (s, 3H), 1.77–1.73 (m, 2H), 1.60–1.51 (m, 6H).

$^{13}C$  NMR (150 MHz,  $CDCl_3$ ):  $\delta$  = 170.2, 160.1, 136.0, 135.9, 128.6, 128.5, 128.0, 123.9, 114.4, 76.8, 57.4, 55.3, 32.5, 32.4, 23.6.

HRMS (ESI):  $m/z$   $[M+H]^+$  calcd for  $C_{20}H_{23}O_3S^+$ : 343.1362; found: 343.1362.

### 39) Cyclohexyl 2-((4-methoxyphenyl)thio)-2-phenylacetate (3ep)

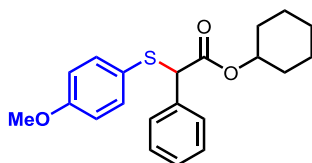

Colorless oil; yield: 86.6 mg (81%).

$^1\text{H}$  NMR (400 MHz,  $\text{CDCl}_3$ ):  $\delta$  = 7.42–7.39 (m, 2H), 7.35–7.26 (m, 5H), 6.82–6.78 (m, 2H), 4.80–4.69 (m, 2H), 3.78 (s, 3H), 1.74–1.63 (m, 4H), 1.38–1.24 (m, 6H).

$^{13}\text{C}$  NMR (150 MHz,  $\text{CDCl}_3$ ):  $\delta$  = 170.2, 160.1, 136.0, 135.9, 128.6, 128.5, 128.0, 123.9, 114.4, 76.8, 57.4, 55.3, 32.5, 32.4, 23.6.

HRMS (ESI):  $m/z$   $[\text{M}+\text{Na}]^+$  calcd for  $\text{C}_{21}\text{H}_{24}\text{NaO}_3\text{S}^+$ : 379.1338; found: 379.1343.

#### 40) 2-Methylallyl 2-((4-methoxyphenyl)thio)-2-phenylacetate (3eq)

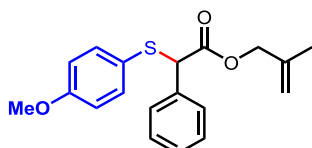

Colorless oil; yield: 62.0 mg (63%).

$^1\text{H}$  NMR (400 MHz,  $\text{CDCl}_3$ ):  $\delta$  = 7.43–7.40 (m, 2H), 7.34–7.28 (m, 5H), 6.80–6.76 (m, 2H), 4.85 (d,  $J$  = 1.2 Hz, 2H), 4.79 (s, 1H), 4.48 (s, 2H), 3.78 (s, 3H), 1.63 (s, 3H).

$^{13}\text{C}$  NMR (100 MHz,  $\text{CDCl}_3$ ):  $\delta$  = 170.2, 160.2, 139.4, 136.1, 135.7, 128.6, 128.2, 114.5, 113.3, 68.7, 57.5, 55.3, 19.3.

HRMS (ESI):  $m/z$   $[\text{M}+\text{H}]^+$  calcd for  $\text{C}_{19}\text{H}_{21}\text{O}_3\text{S}^+$ : 329.1206; found: 329.1210.

#### 41) Methyl 2-((4-methoxyphenyl)thio)-2-(naphthalen-2-yl)acetate (3er)

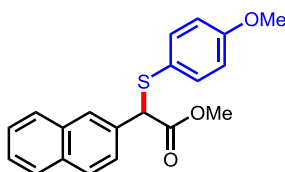

Colorless oil; yield: 73.1 mg (72%).

$^1\text{H}$  NMR (400 MHz,  $\text{CDCl}_3$ ):  $\delta$  = 8.15 (d,  $J$  = 8.4 Hz, 1H), 7.88 (d,  $J$  = 8.0 Hz, 1H), 7.81 (d,  $J$  = 8.0 Hz, 1H), 7.66 (d,  $J$  = 7.2 Hz, 1H), 7.58–7.49 (m, 2H), 7.44–7.35 (m, 3H), 6.81–6.77 (m, 2H), 5.54 (s, 1H), 3.78 (s, 3H), 3.67 (s, 3H).

$^{13}\text{C}$  NMR (100 MHz,  $\text{CDCl}_3$ ):  $\delta$  = 171.4, 160.2, 136.1, 133.9, 131.3, 130.9, 129.0, 128.9, 126.8, 126.6, 125.8, 125.3, 123.1, 114.4, 55.3, 54.1, 52.7.

HRMS (ESI):  $m/z$   $[\text{M}+\text{Na}]^+$  calcd for  $\text{C}_{20}\text{H}_{18}\text{NaO}_3\text{S}^+$ : 361.0869; found: 361.0868.

#### 42) Isopropyl 2-(benzylthio)-2-phenylacetate (3yc)



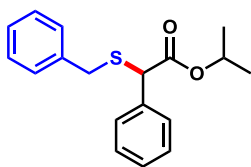

Colorless oil; yield: 65.7 mg (73%).

$^1\text{H}$  NMR (600 MHz,  $\text{CDCl}_3$ ):  $\delta$  = 7.41 (d,  $J$  = 7.2 Hz, 2H), 7.35–7.23 (m, 8H), 5.05–4.99 (m, 1H), 4.39 (s, 1H), 3.78 (d,  $J$  = 13.2 Hz, 1H), 3.64 (d,  $J$  = 13.2 Hz, 1H), 1.25 (d,  $J$  = 6.0 Hz, 3H), 1.19 (d,  $J$  = 6.0 Hz, 3H).

$^{13}\text{C}$  NMR (150 MHz,  $\text{CDCl}_3$ ):  $\delta$  = 170.1, 137.3, 136.2, 129.1, 128.6, 128.5, 128.0, 127.2, 69.2, 52.1, 36.3, 21.7, 21.6.

HRMS (ESI):  $m/z$   $[\text{M}+\text{H}]^+$  calcd for  $\text{C}_{18}\text{H}_{21}\text{O}_2\text{S}^+$ : 301.1257; found: 301.1254.

#### 43) Isopropyl 2-(dodecylthio)-2-phenylacetate (3zc)

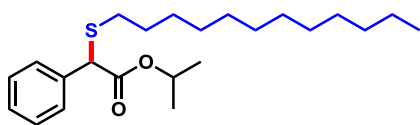

Colorless oil; yield: 75.0 mg (66%).

$^1\text{H}$  NMR (400 MHz,  $\text{CDCl}_3$ ):  $\delta$  = 7.53–7.46 (m, 2H), 7.35–7.26 (m, 3H), 5.09–5.00 (m, 1H), 4.52 (d,  $J$  = 1.2 Hz, 1H), 2.57–2.45 (m, 2H), 1.59–1.51 (m, 2H), 1.41 (dd,  $J$  = 6.4, 1.4 Hz, 2H), 1.23 (m, 22H), 0.90–0.86 (m, 3H).

$^{13}\text{C}$  NMR (100 MHz,  $\text{CDCl}_3$ ):  $\delta$  = 170.5, 136.4, 128.5, 128.4, 127.9, 69.1, 52.4, 31.9, 29.6, 29.5, 29.4, 29.3, 29.1, 29.0, 28.8, 22.7, 21.7, 21.5, 14.1.

HRMS (ESI):  $m/z$   $[\text{M}+\text{Na}]^+$  calcd for  $\text{C}_{23}\text{H}_{38}\text{NaO}_2\text{S}^+$ : 401.2485; found: 401.2485.

## 5. References

- [1] H. Keipour and T. Ollevier, *Org. Lett.*, 2017, **19**, 5736–5739.
- [2] Z. Yu, Y. Li, J. Shi, B. Ma, L. Liu and J. Zhang. *Angew. Chem. Int. Ed.*, 2016, **55**, 14807–14811.
- [3] F. Hu, Q. Zhou, F. Cao, W-D. Chu, L. He and Q-Z. Liu, *J. Org. Chem.*, 2018, **83**, 12806–12814.
- [4] Z. Yu, Y. Li, P. Zhang, L. Liu and J. Zhang. *Chem. Sci.*, 2019, **10**, 6553–6559.
- [5] J. Yang, J. Duan, G. Wang, H. Zhou, B. Ma, C. Wu and J. Xiao, *Org. Lett.*, 2020, **22**, 7284–7289.
- [6] R. D. C. Gallo, P. B. Momo, D. P. Day and A. C. B. Burtoloso, *Org. Lett.*, 2020, **22**, 2339–2343.
- [7] M. L. Stivanin, A. A. G. Fernandes, A. F. da Silva, C. Y. O. Jr and I. D. Jurberg, *Synth. Catal.*, 2020,

**362**, 1106–1111.

[8] V. Tyagi, R. B. Bonn and R. Fasan, *Chem. Sci.*, 2015, **6**, 2488–2494.

[9] X. Yan, C. Li, X. Xu, Q. He, X. Zhao and Y. Pan, *Tetrahedron.*, 2019, **75**, 3081–3087.

[10] K. Eggers, T. M. Fyles and P. J. Montoya-Pelaez, *J. Org. Chem.*, 2001, **66**, 2966–2977.

[11] T. R. K. Reddy, C. Li, X. Guo, P. M. Fischer and L. V. Dekker, *Bioorg. Med. Chem.*, 2014, **22**, 5378–5391.

[12] N. Tanbouza, H. Keipour and T. Ollevier, *RSC Adv.*, 2019, **9**, 31241–31246.

## **6. Cope of NMR Spectra**

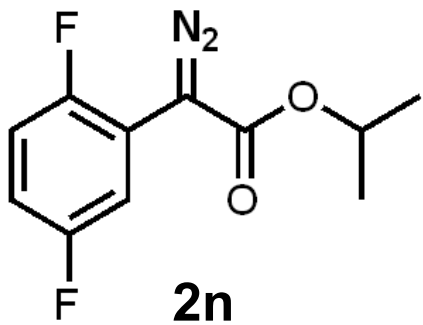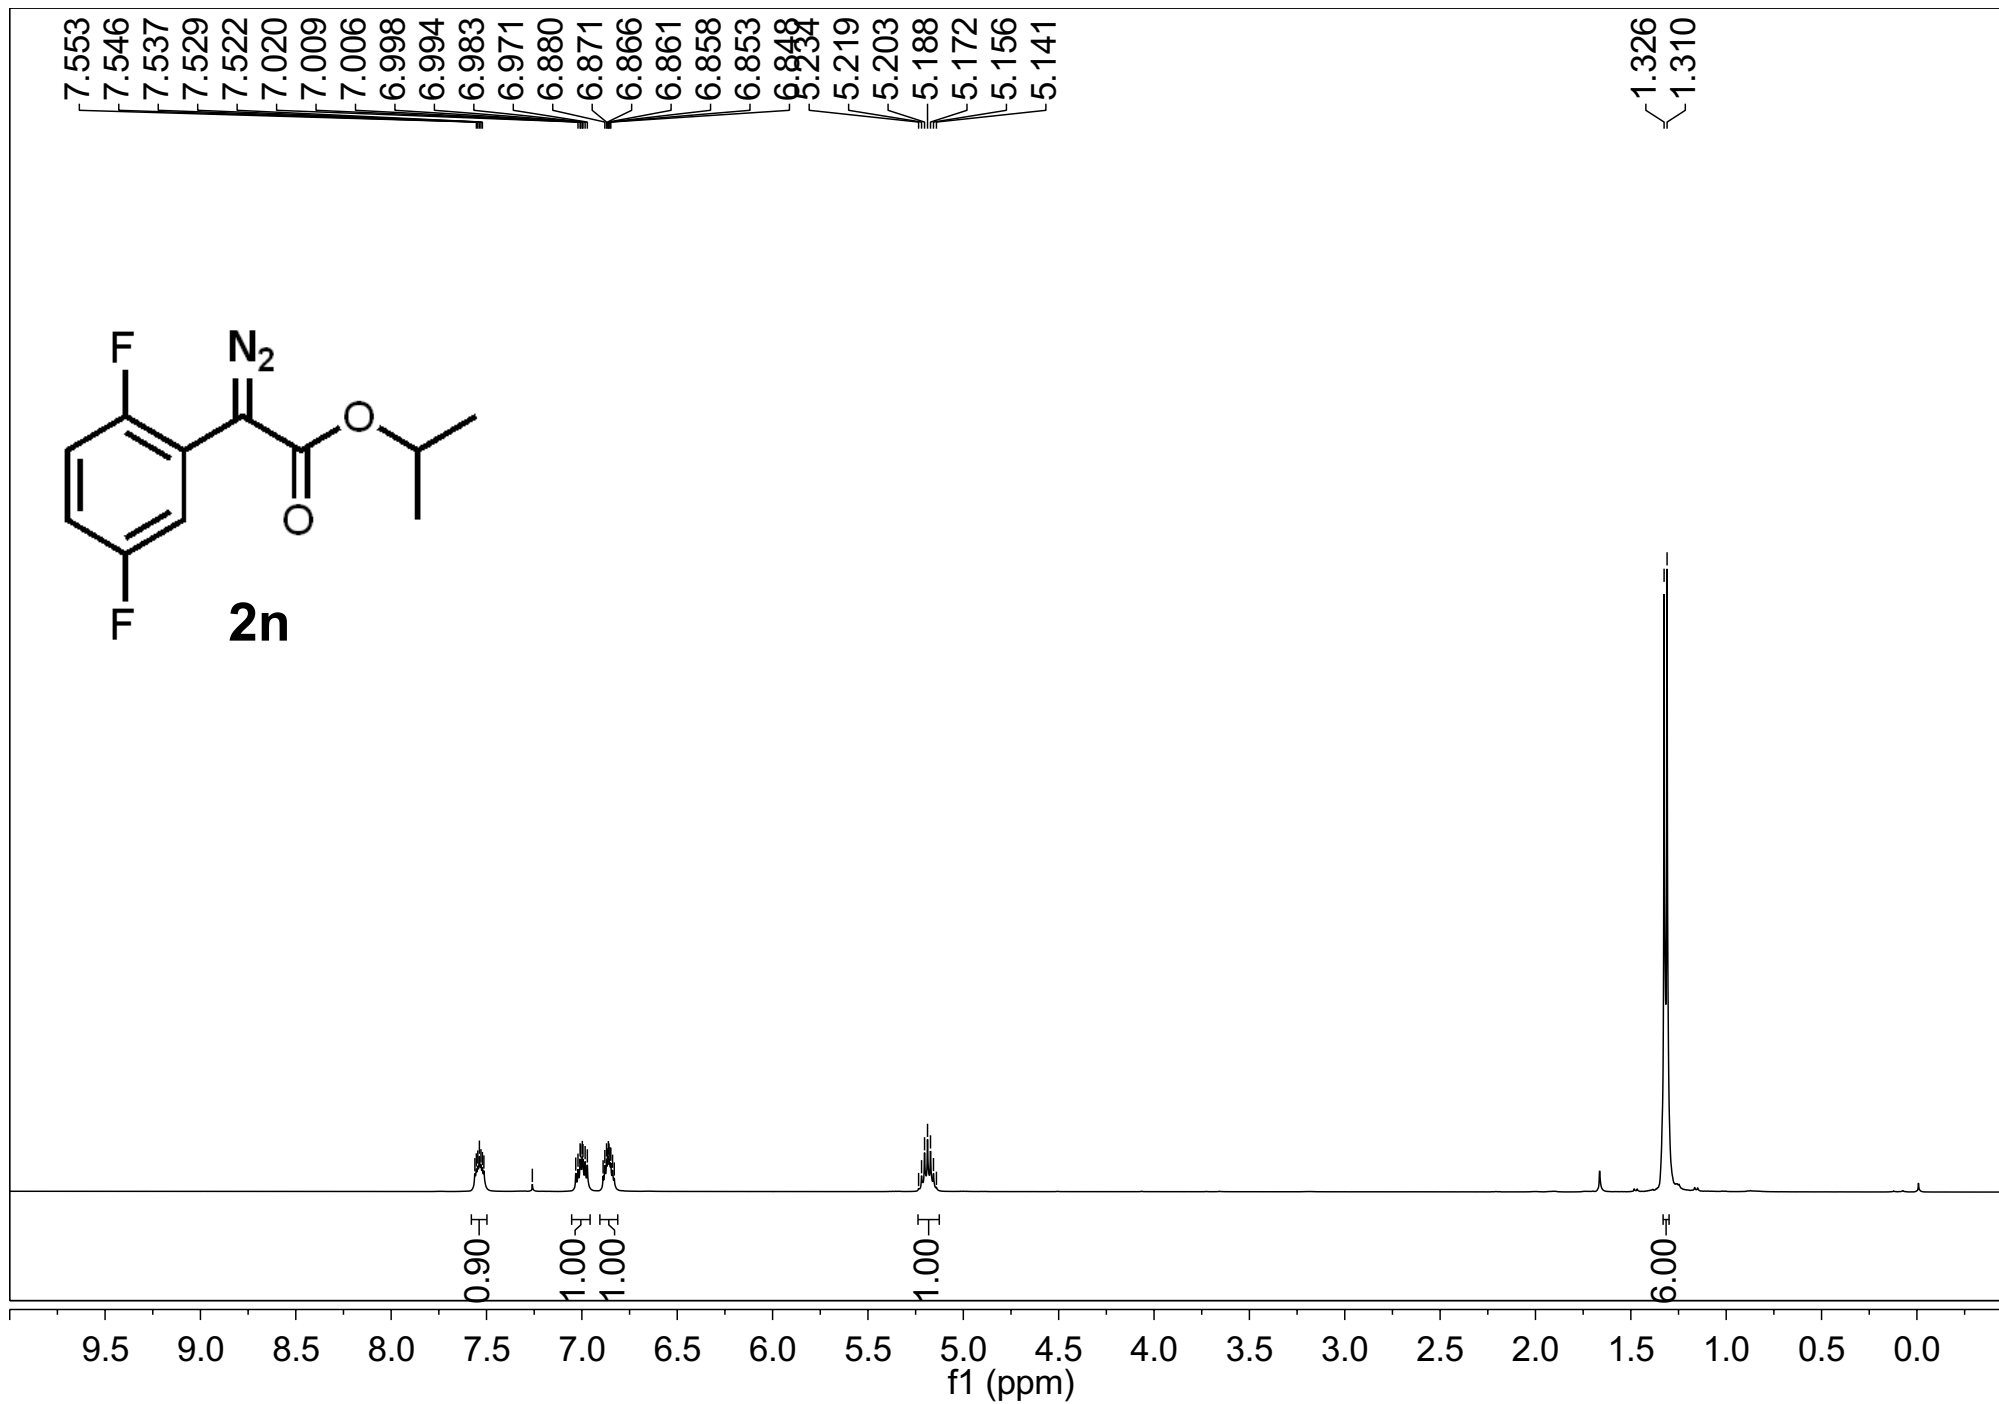

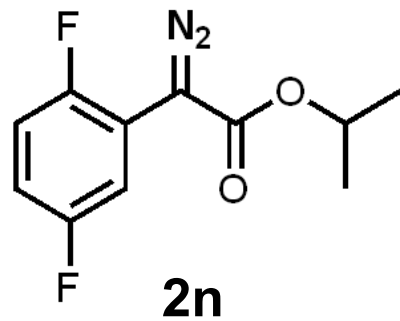

164.243  
160.027  
157.622  
155.091

116.504  
116.412  
116.262  
116.171  
115.281  
115.009  
114.188  
114.104  
113.946  
113.860

77.318  
77.000  
76.683  
69.195

21.960

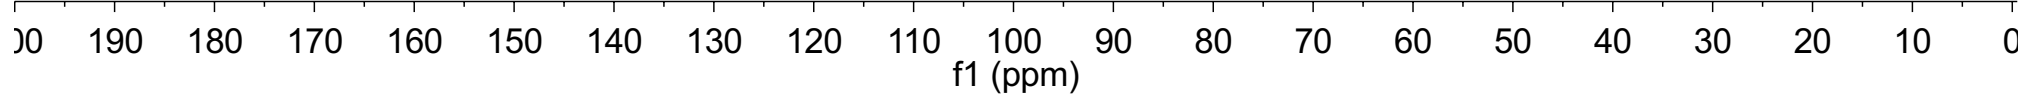

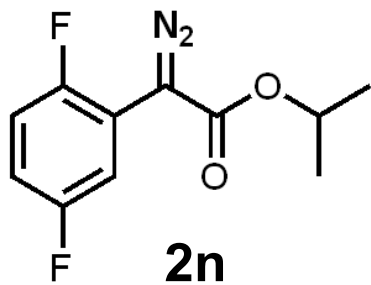

-117.944  
-117.957  
-117.964  
-117.970  
-117.976  
-117.983  
-117.989  
-118.002  
-118.007  
-118.014  
-118.020  
-118.026  
-118.033  
-118.046  
-120.994

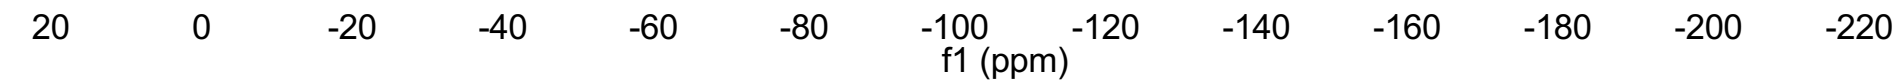

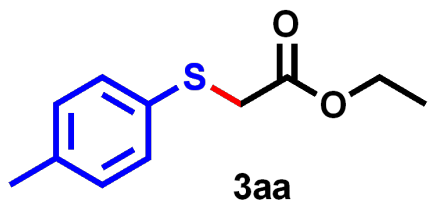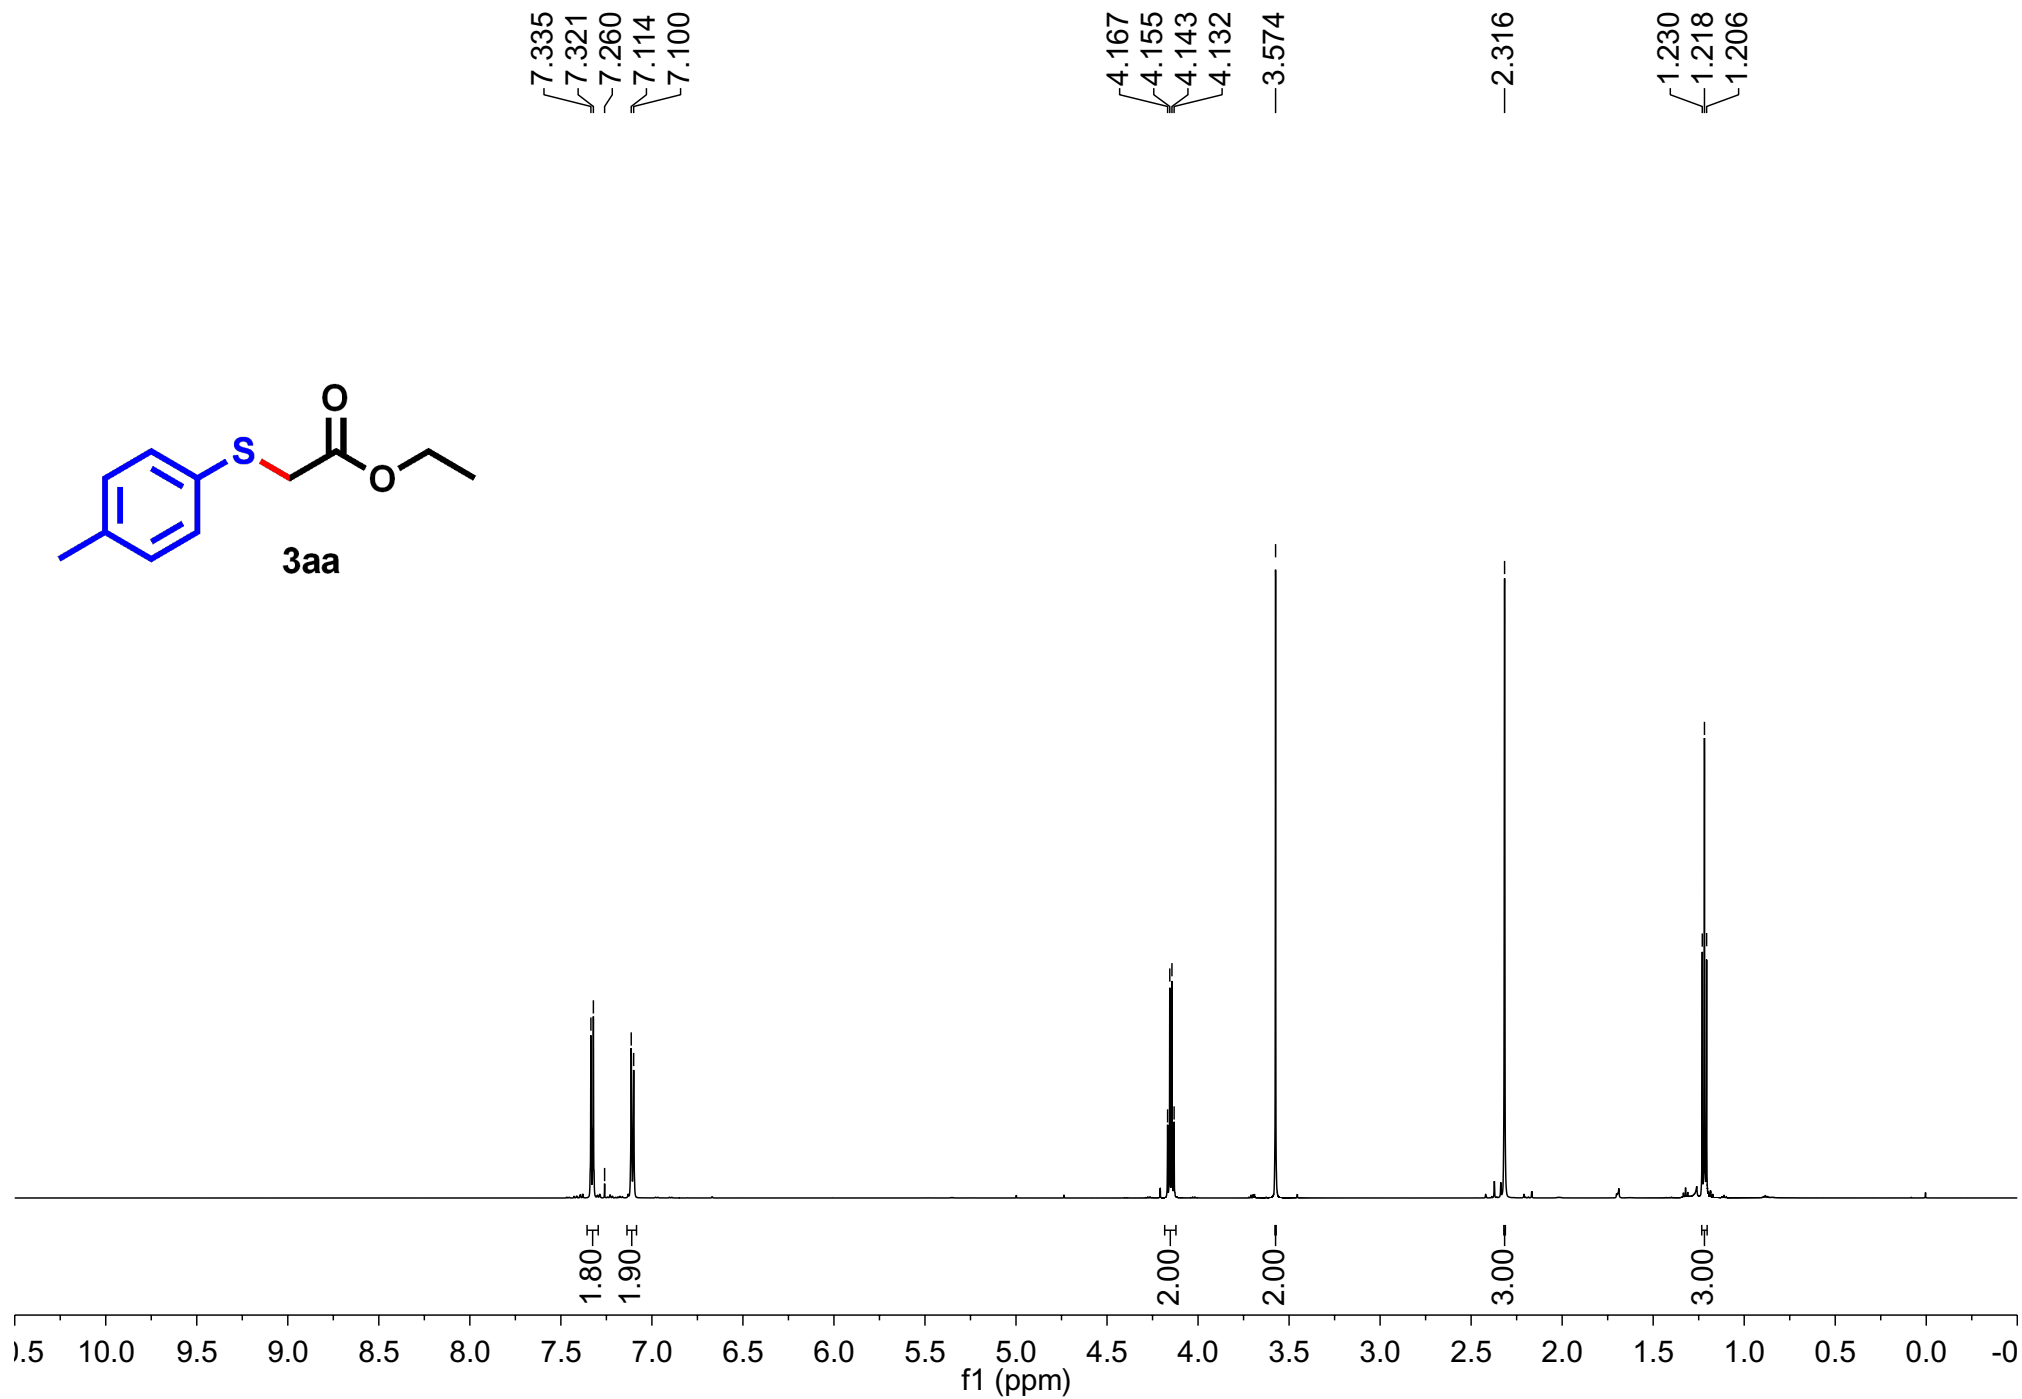

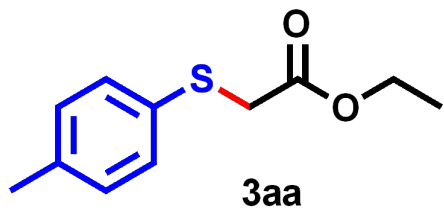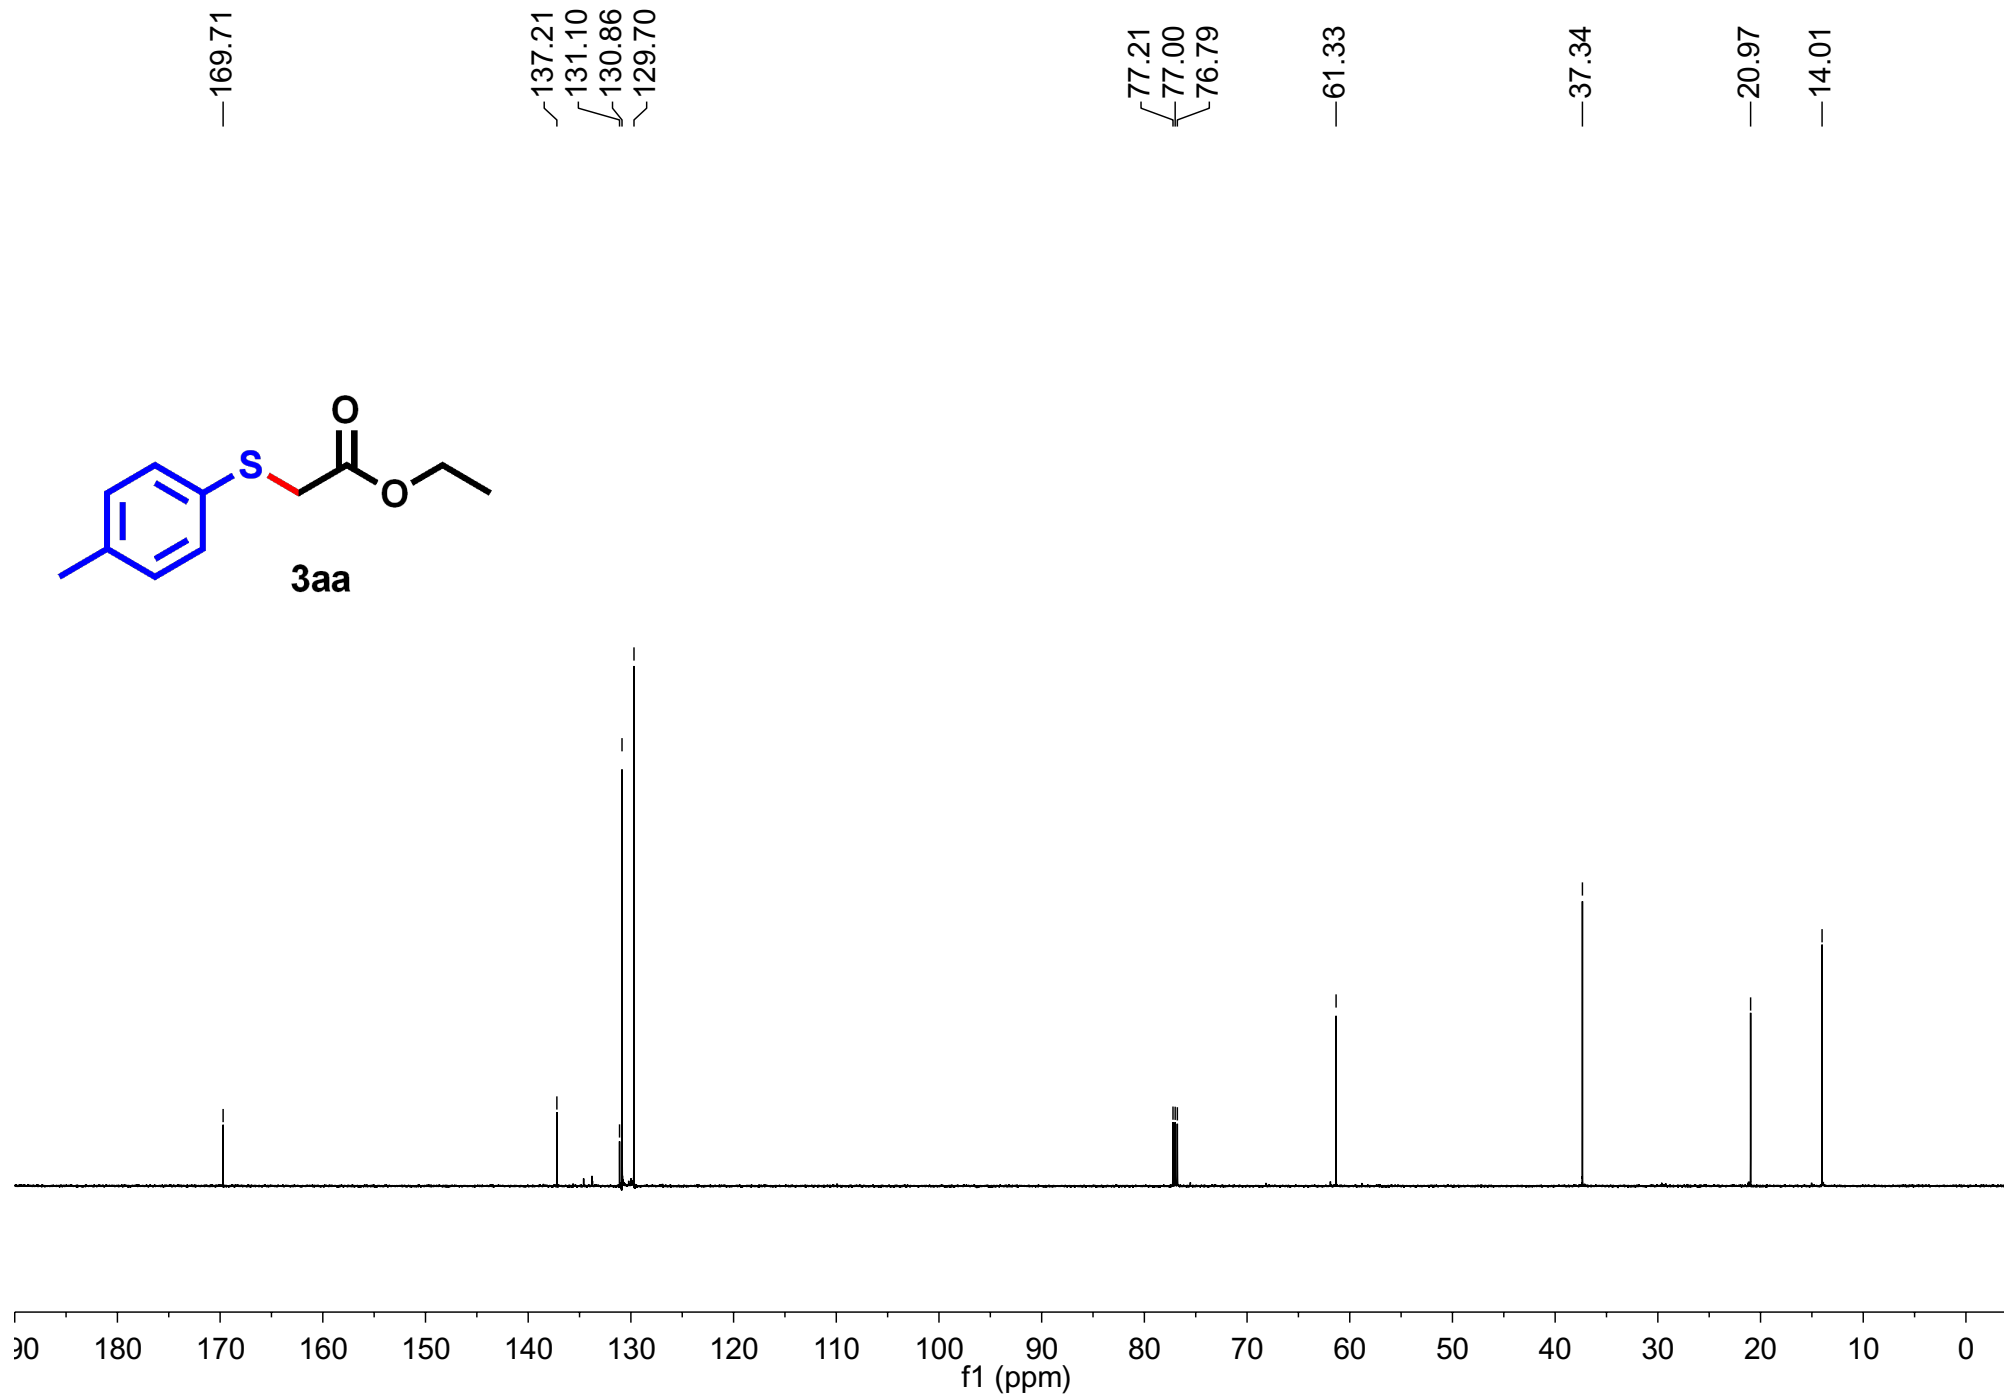

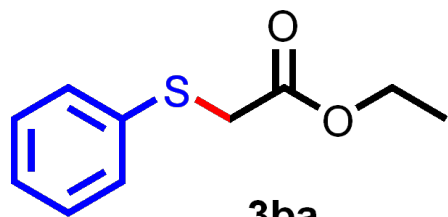

3ba

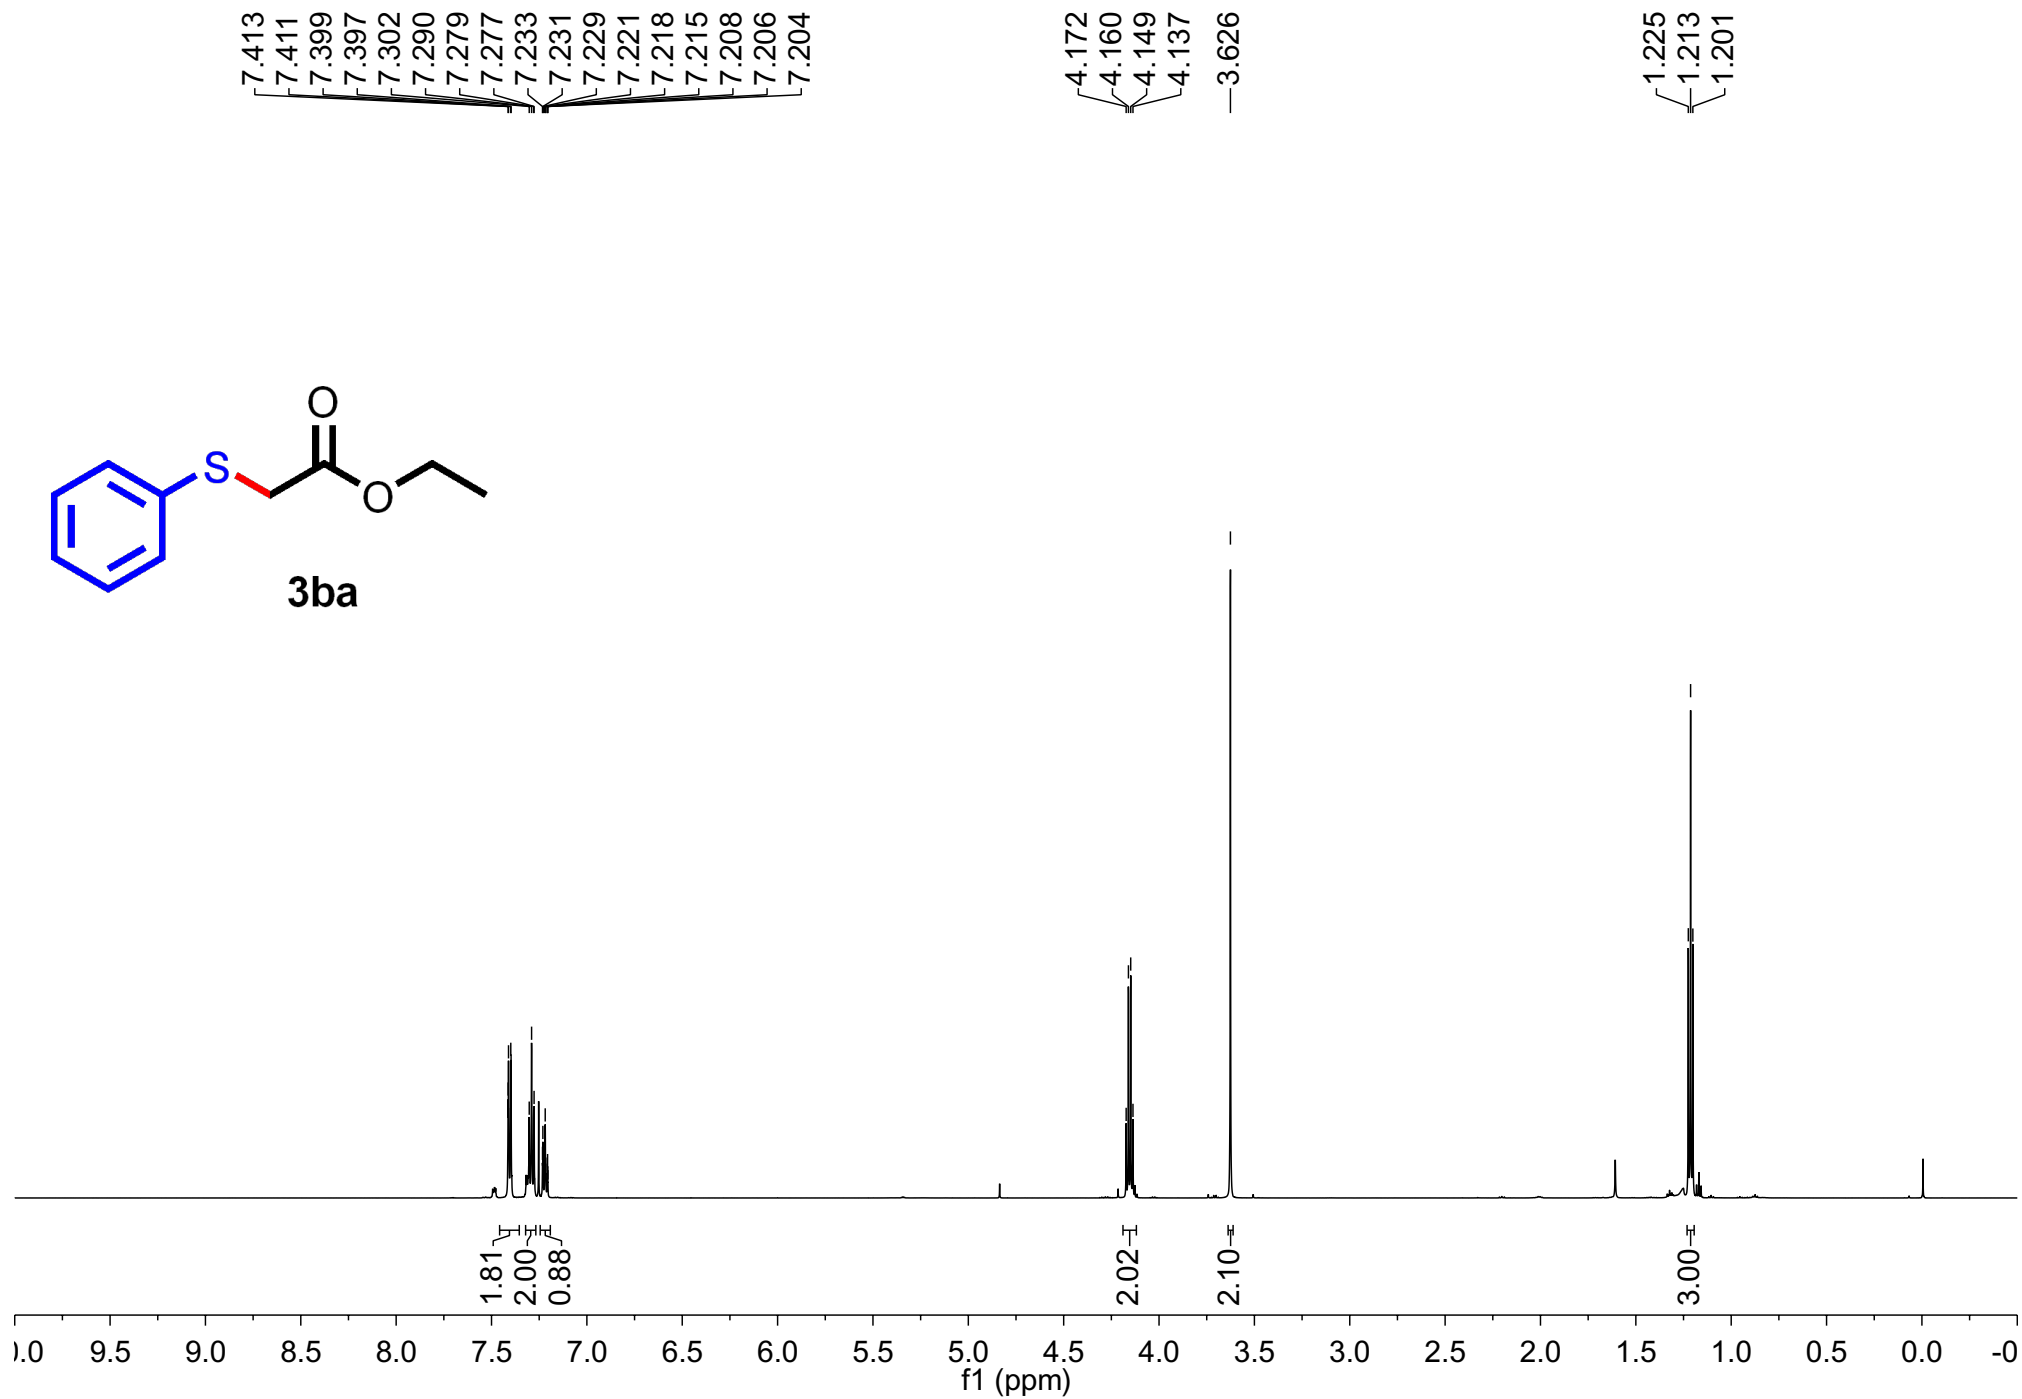



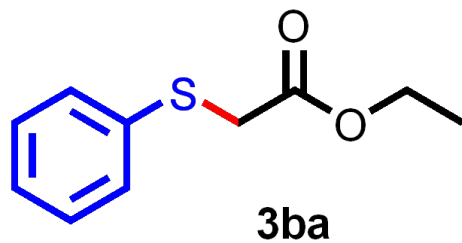

—169.63

134.96  
133.33  
129.98  
128.97  
126.91

77.21  
77.00  
76.79

—61.49

—36.71

—14.04

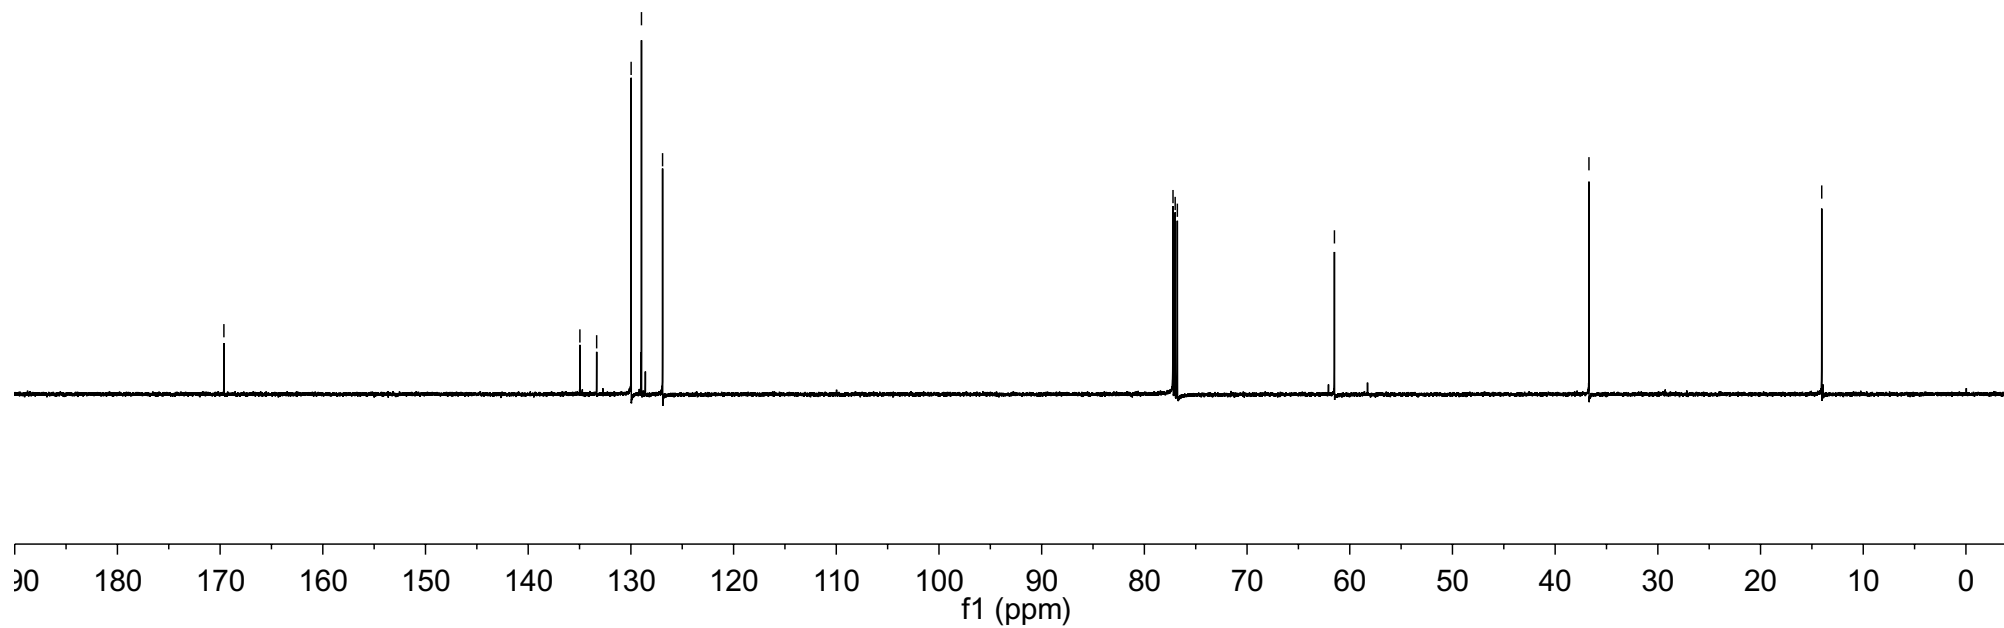

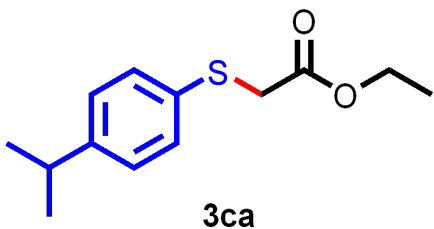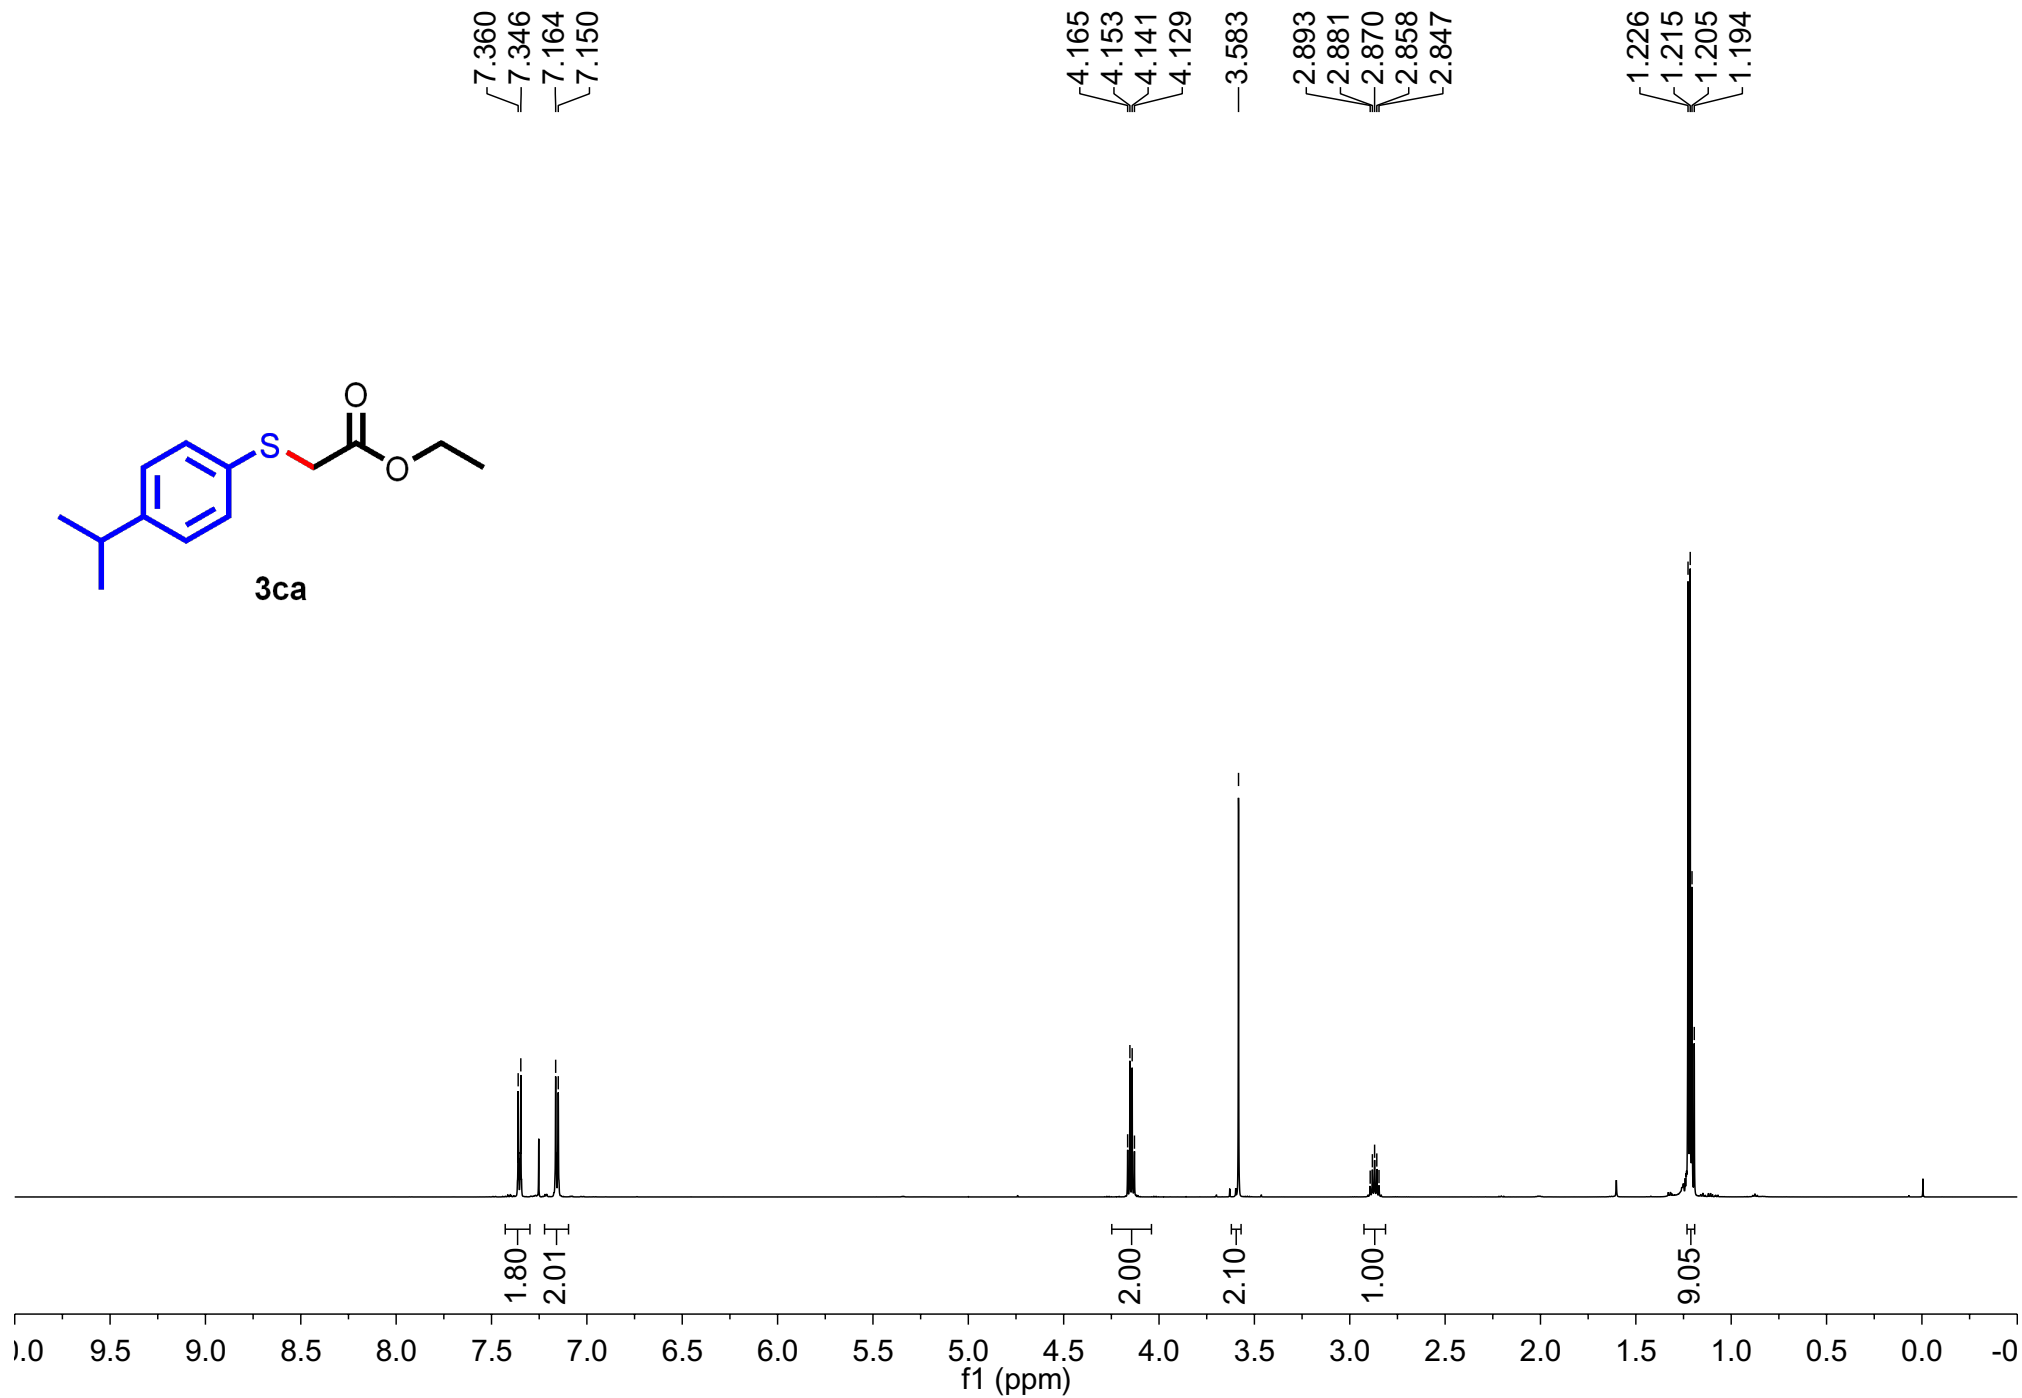

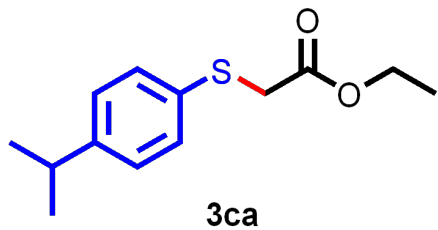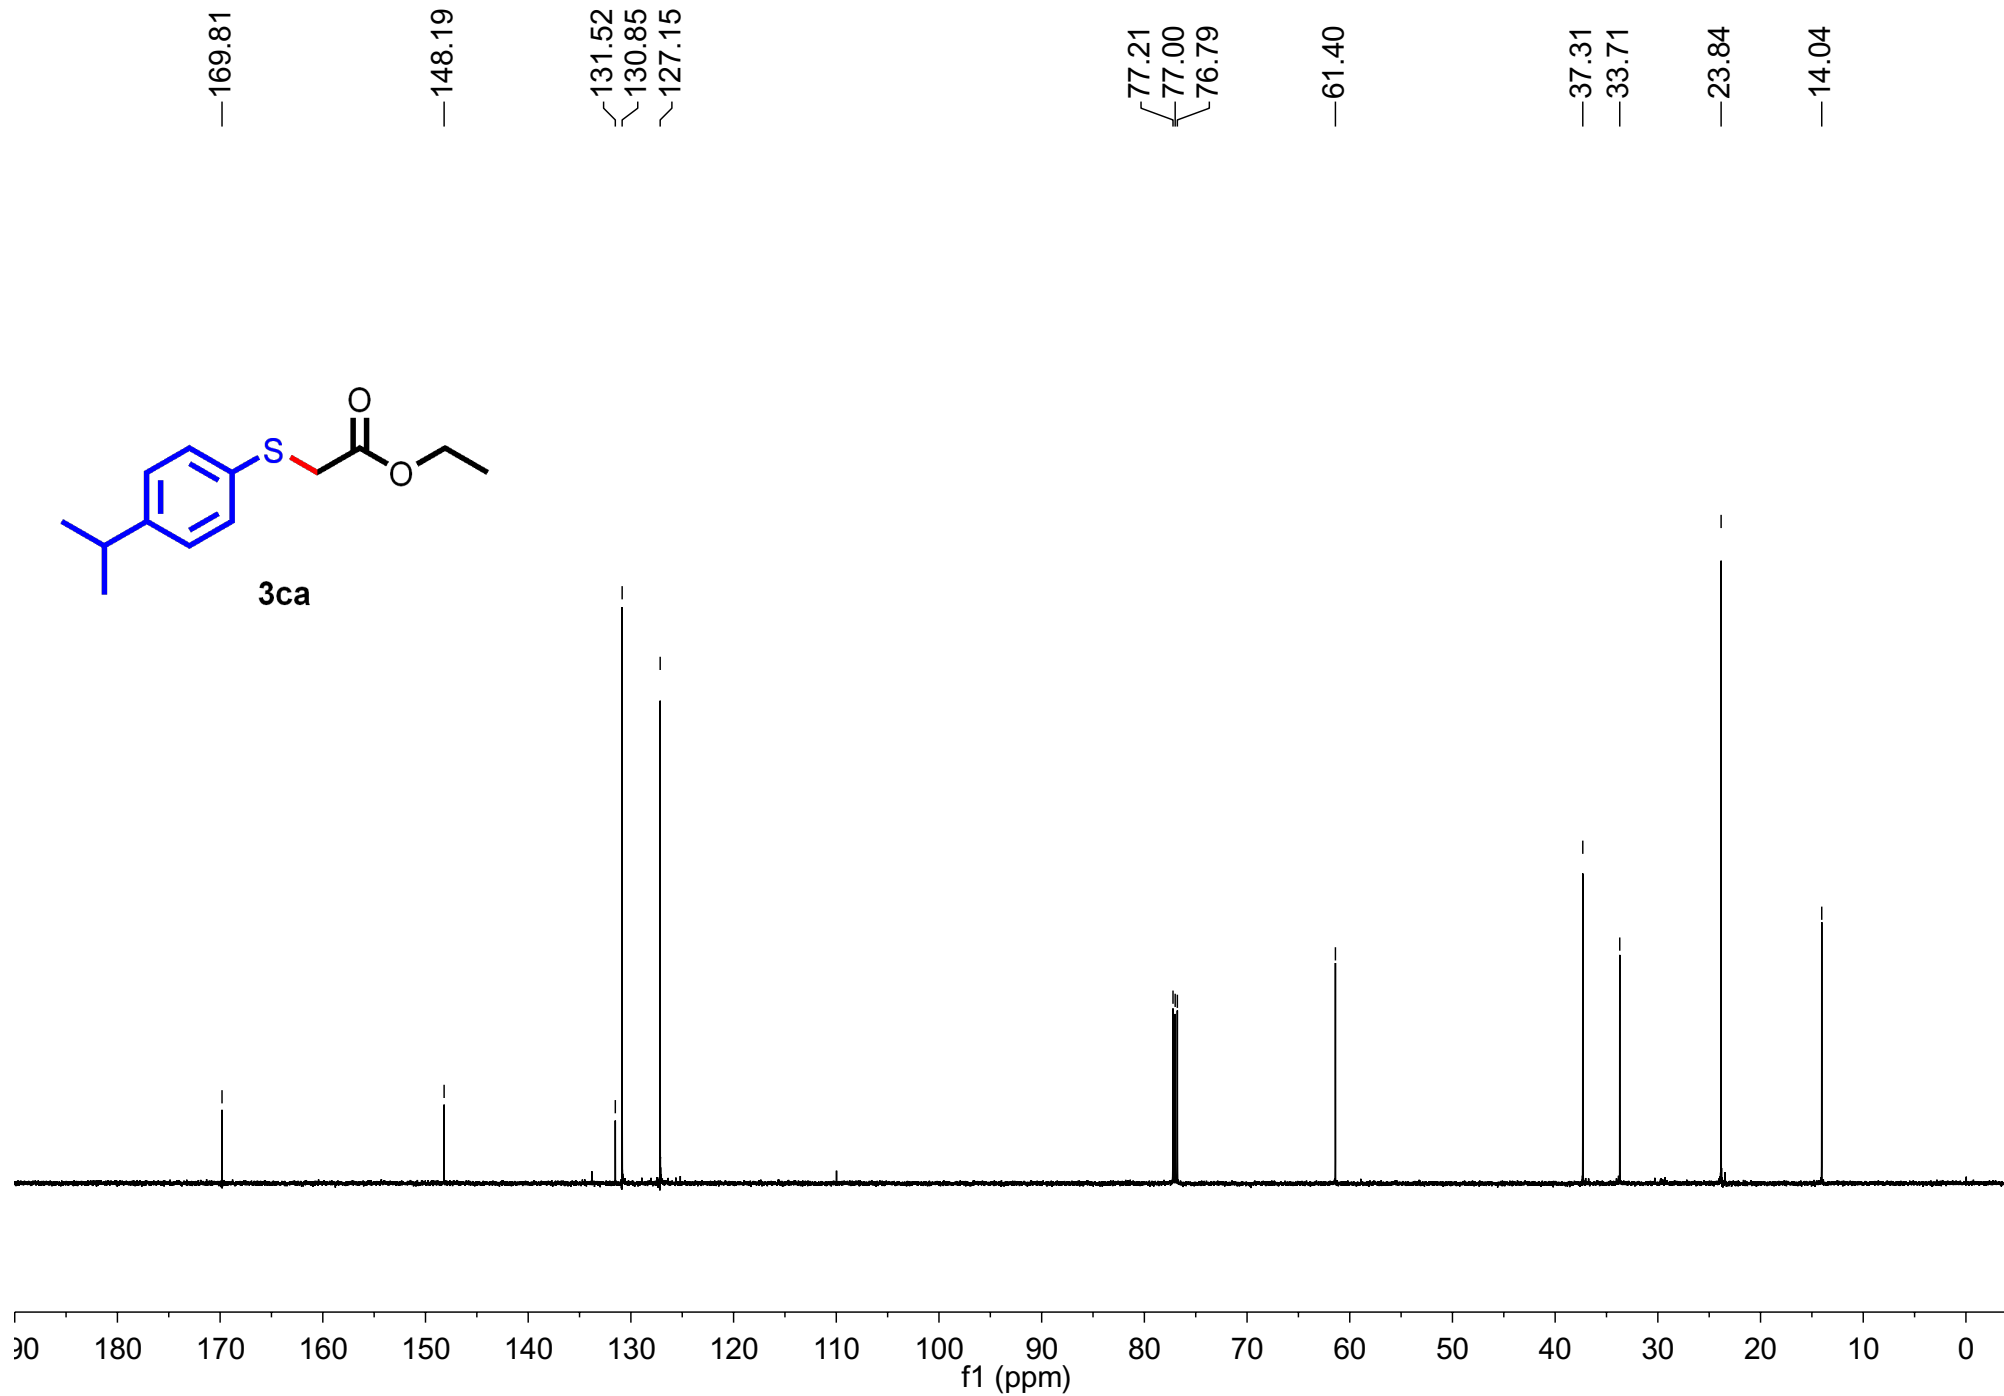

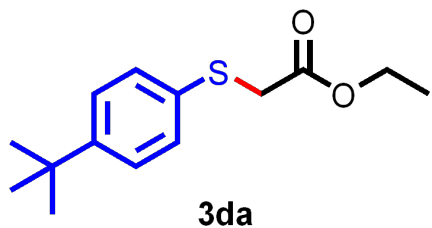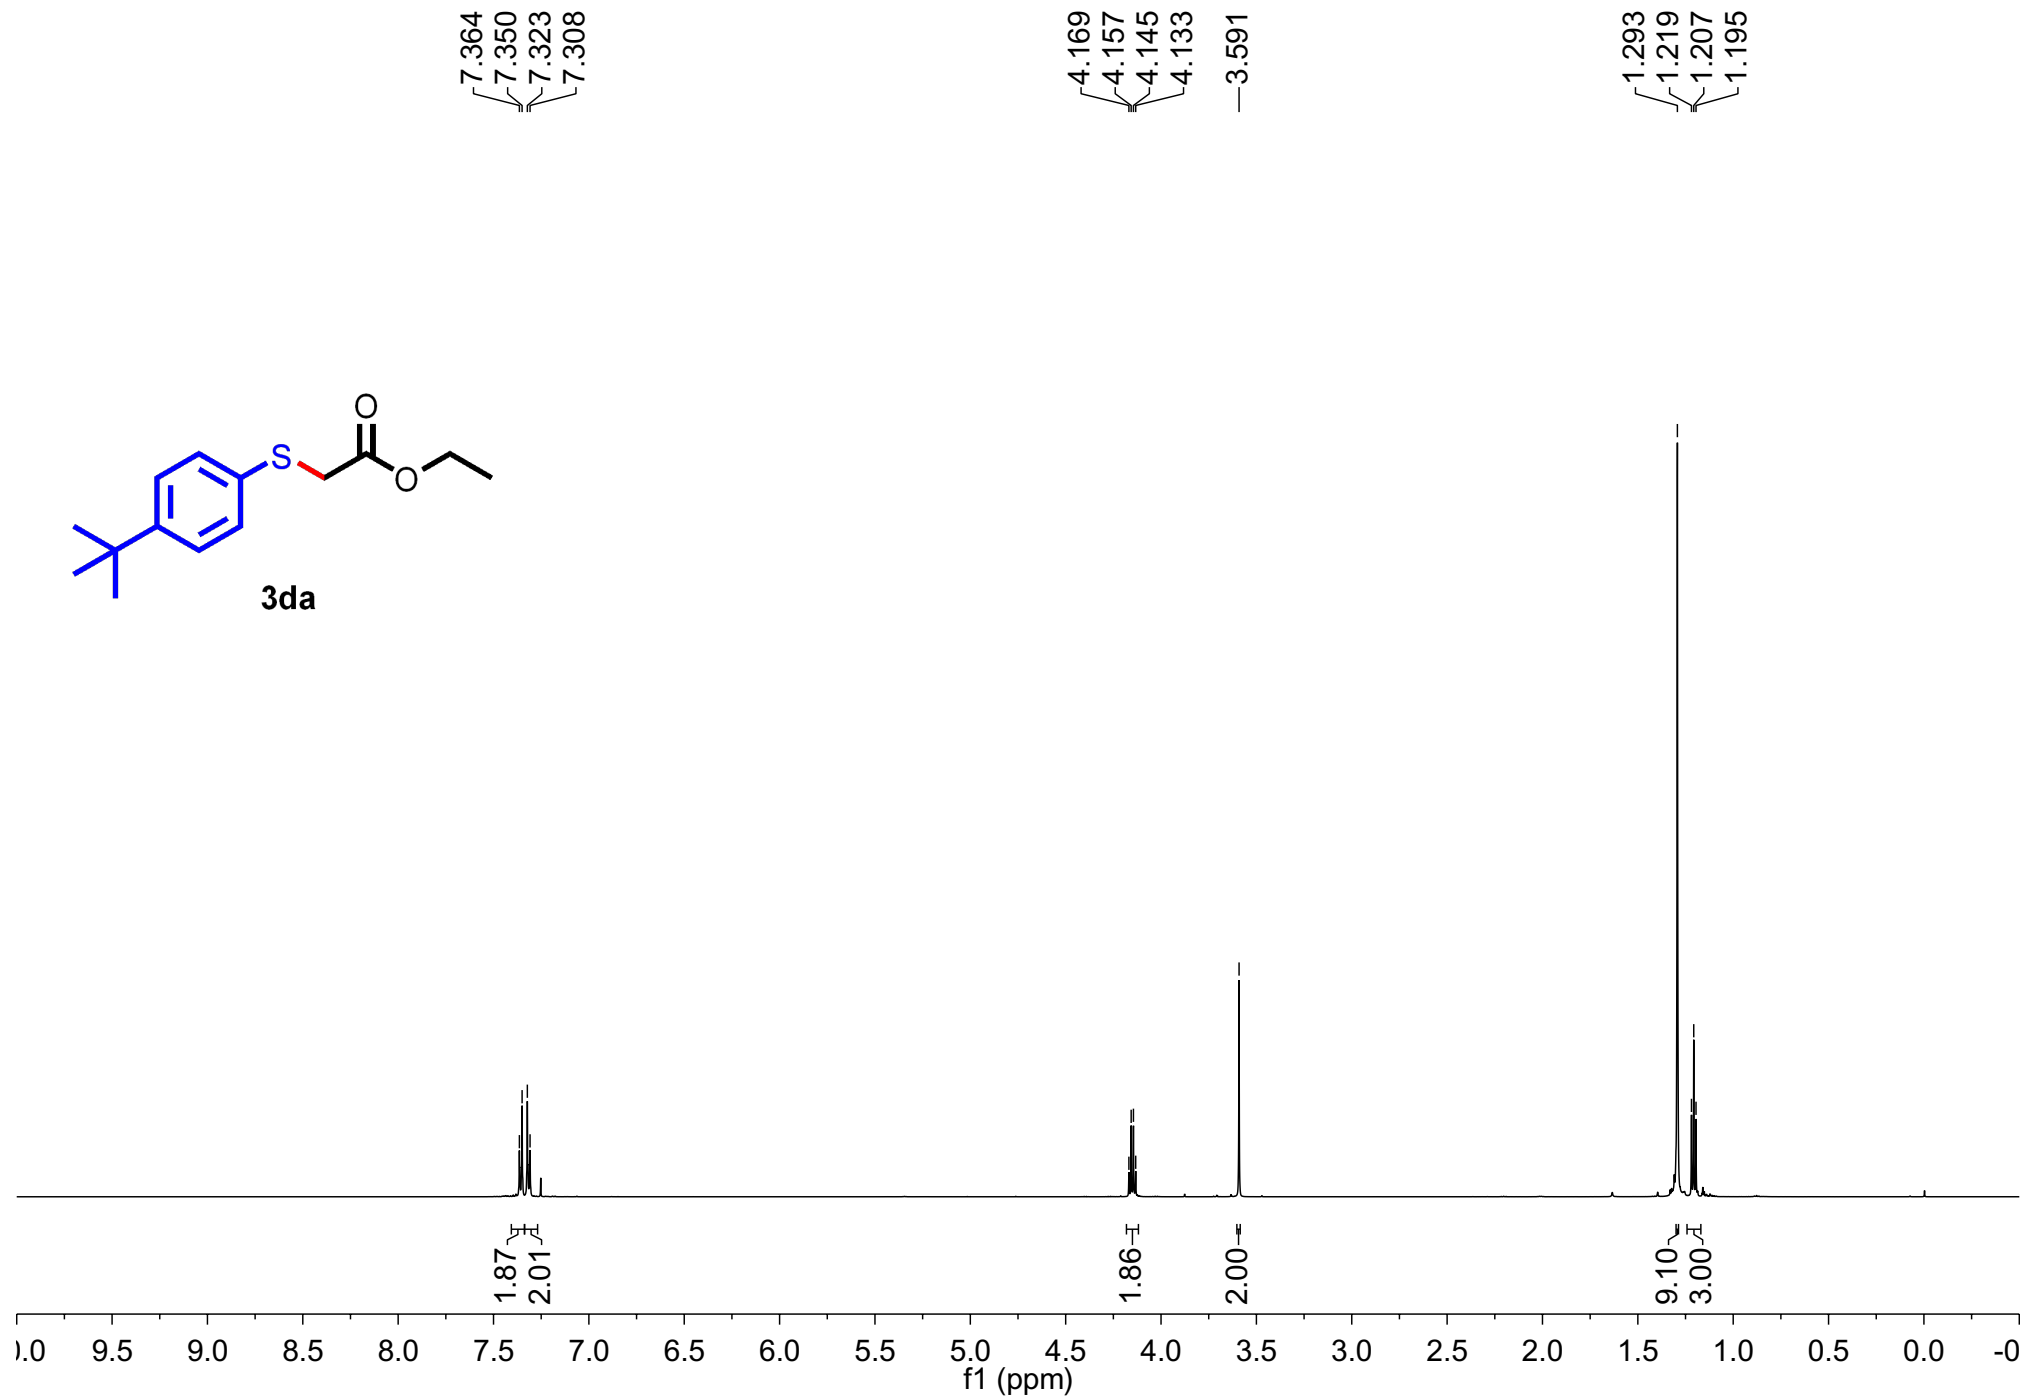

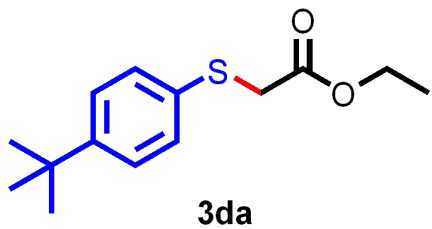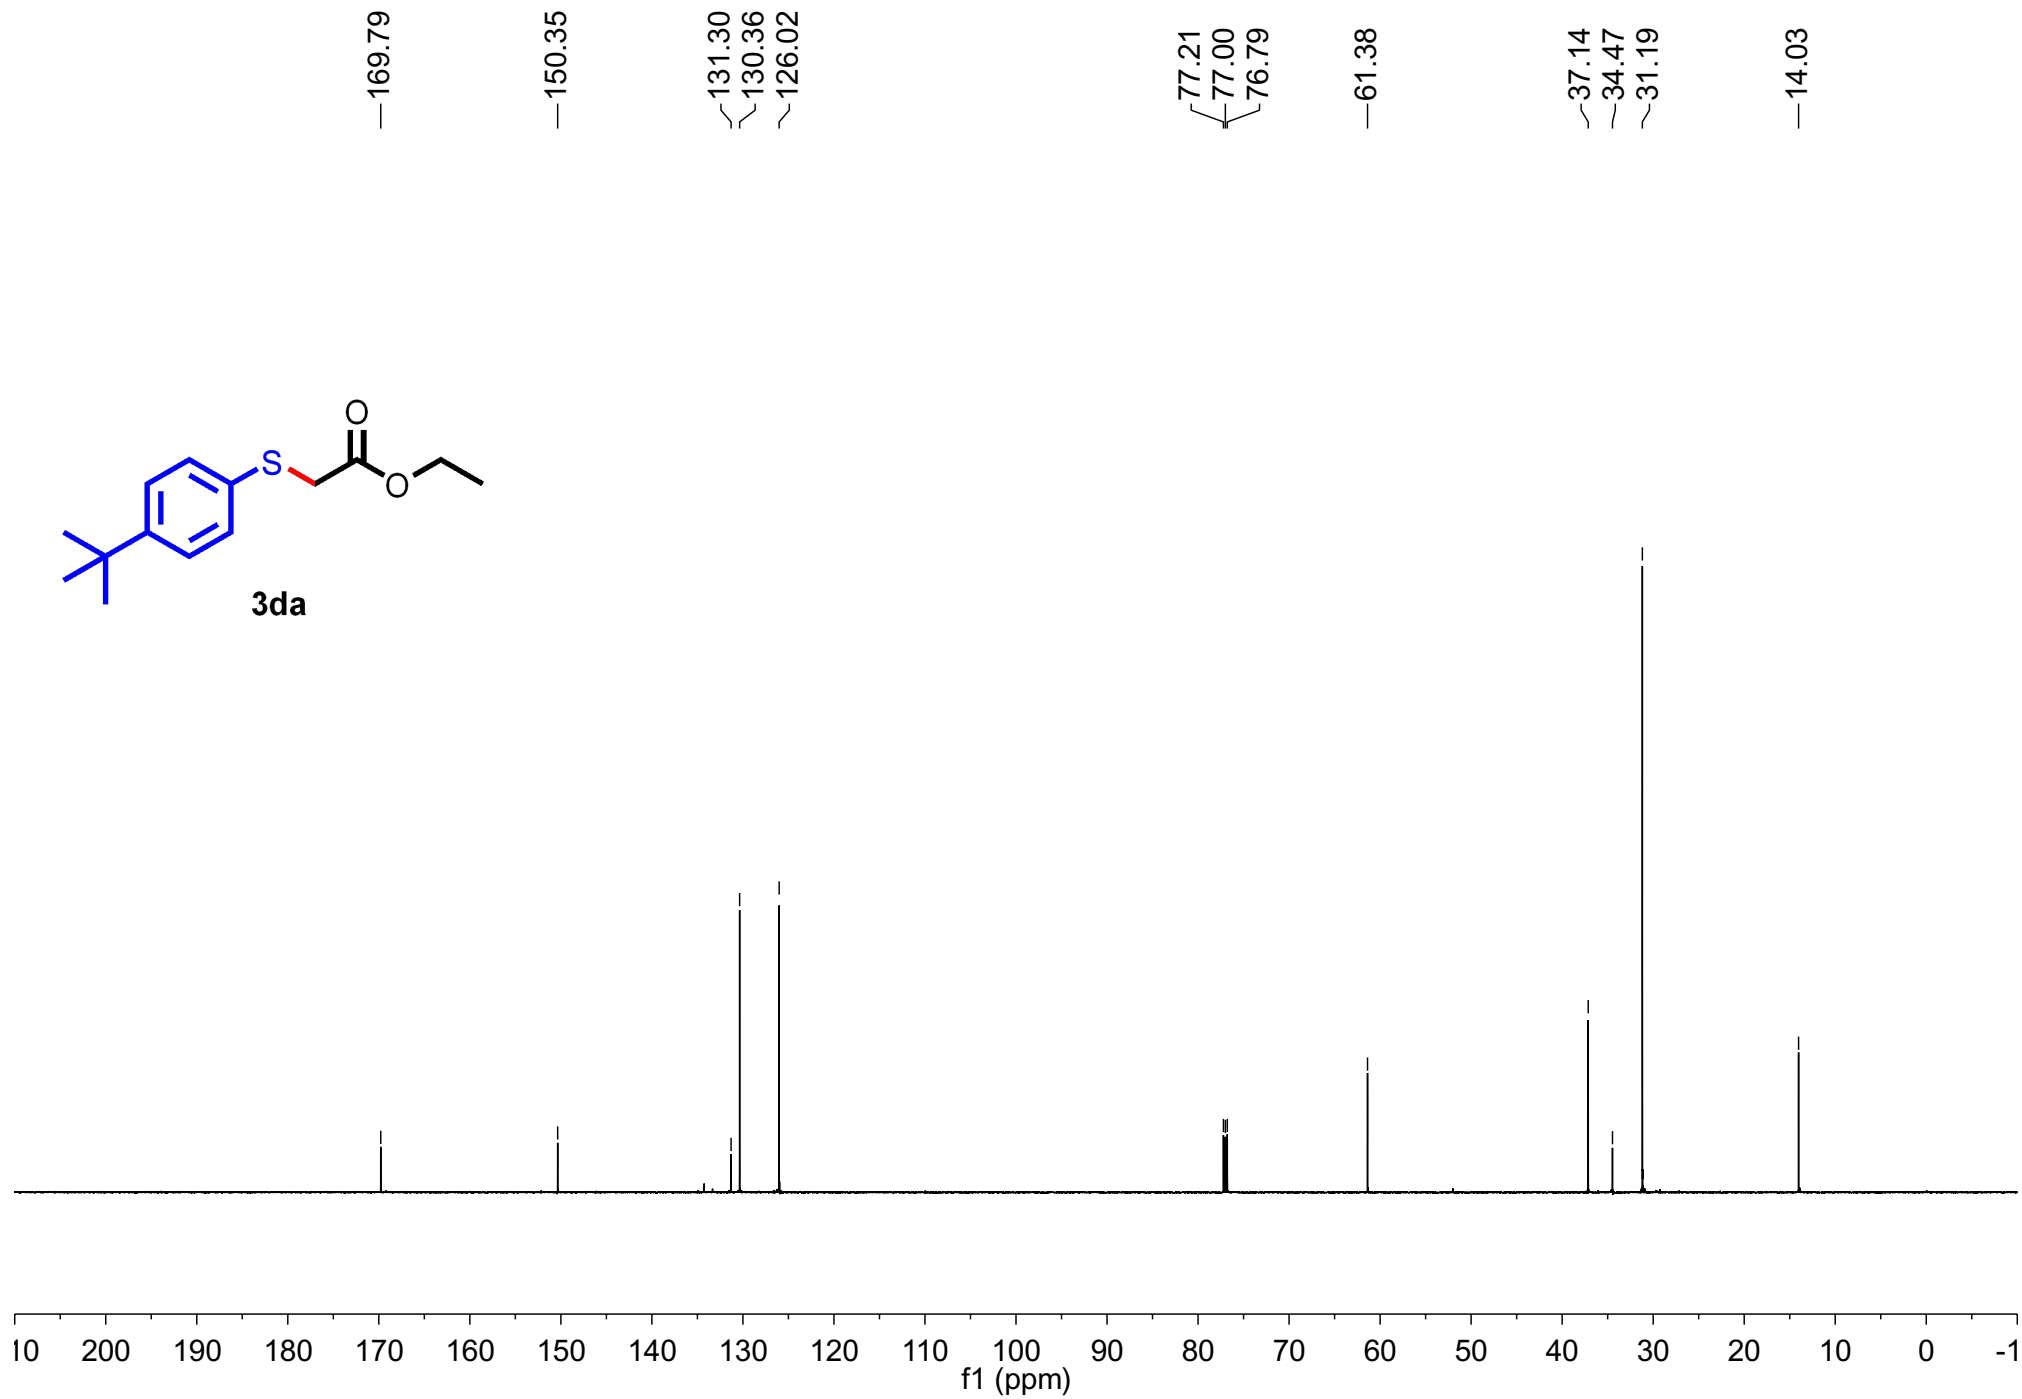

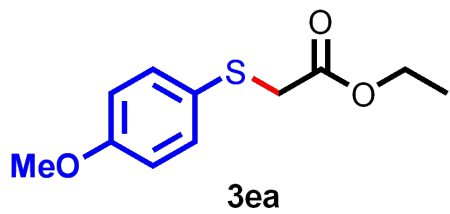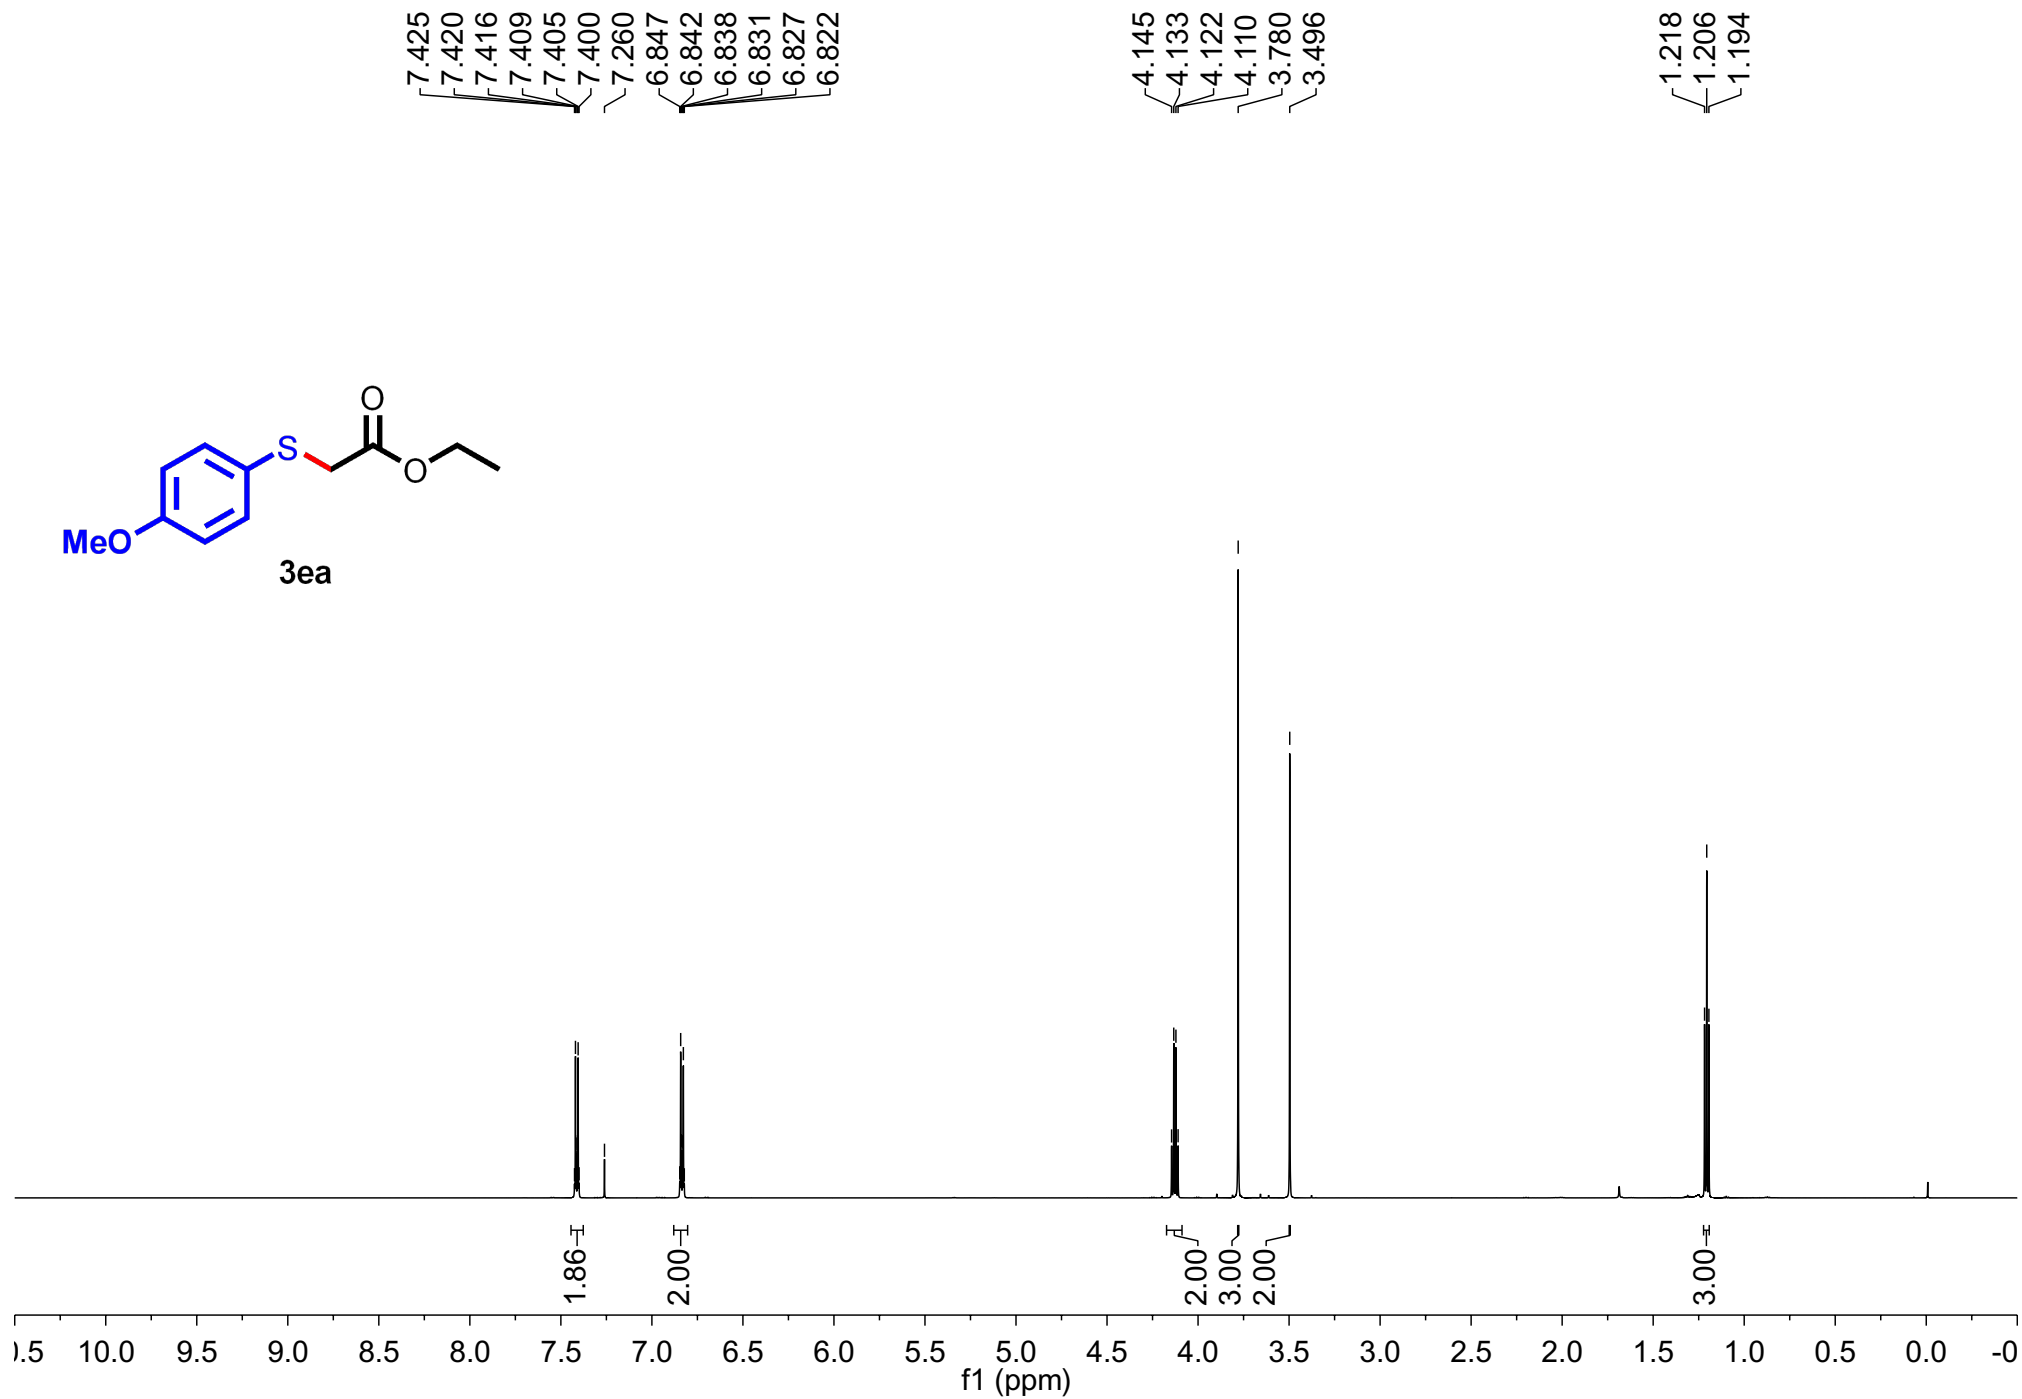

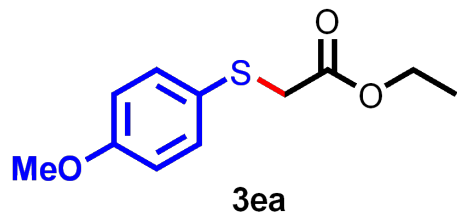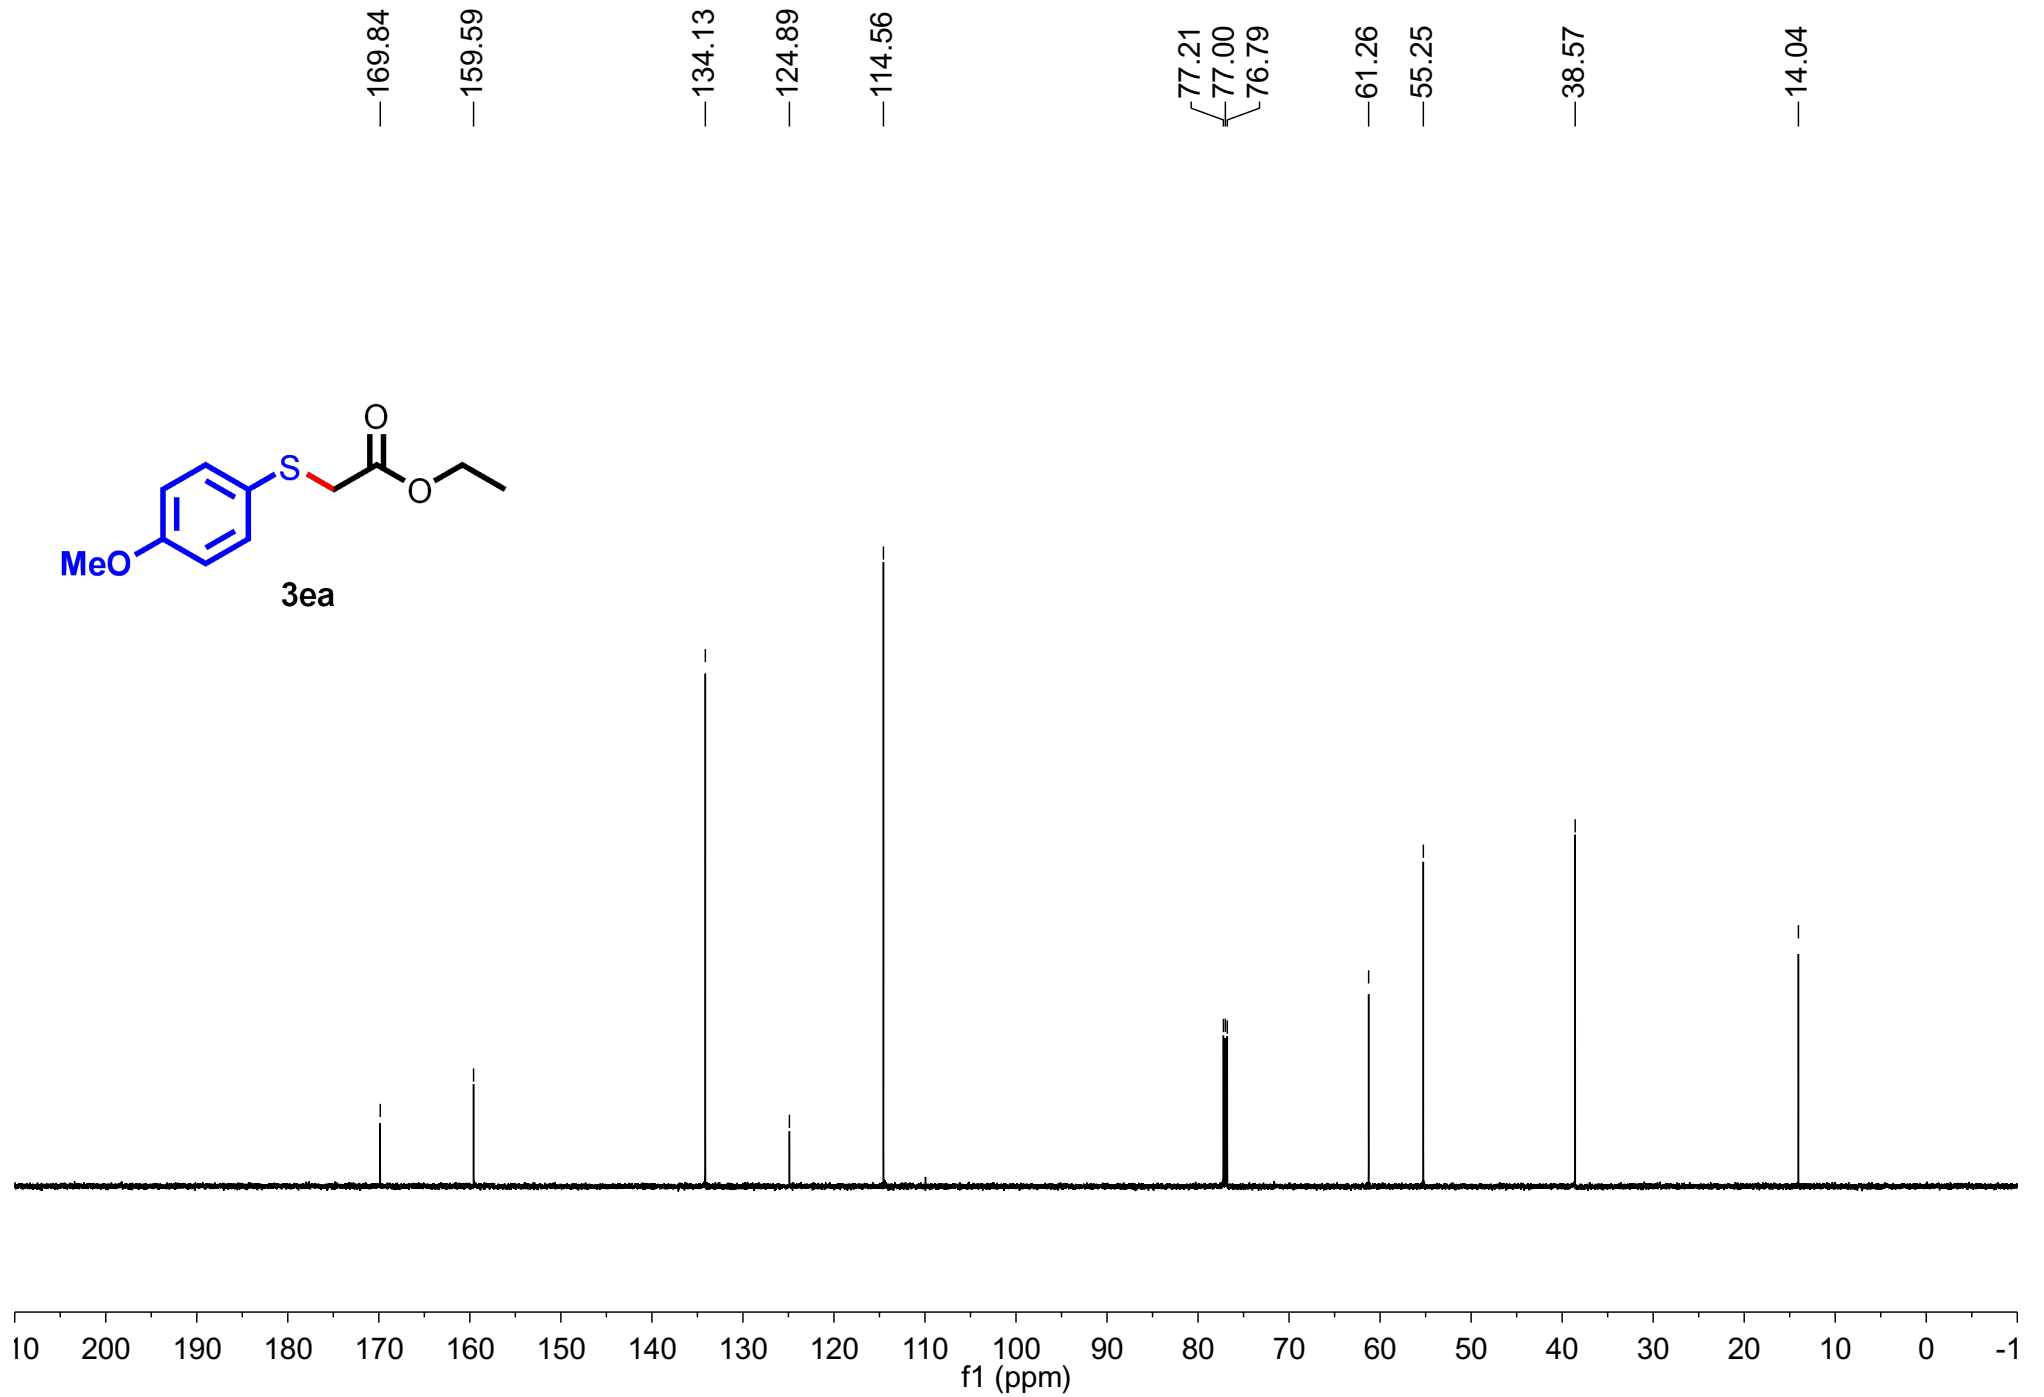

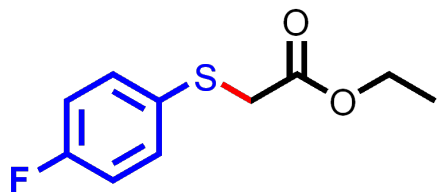

**3fa**

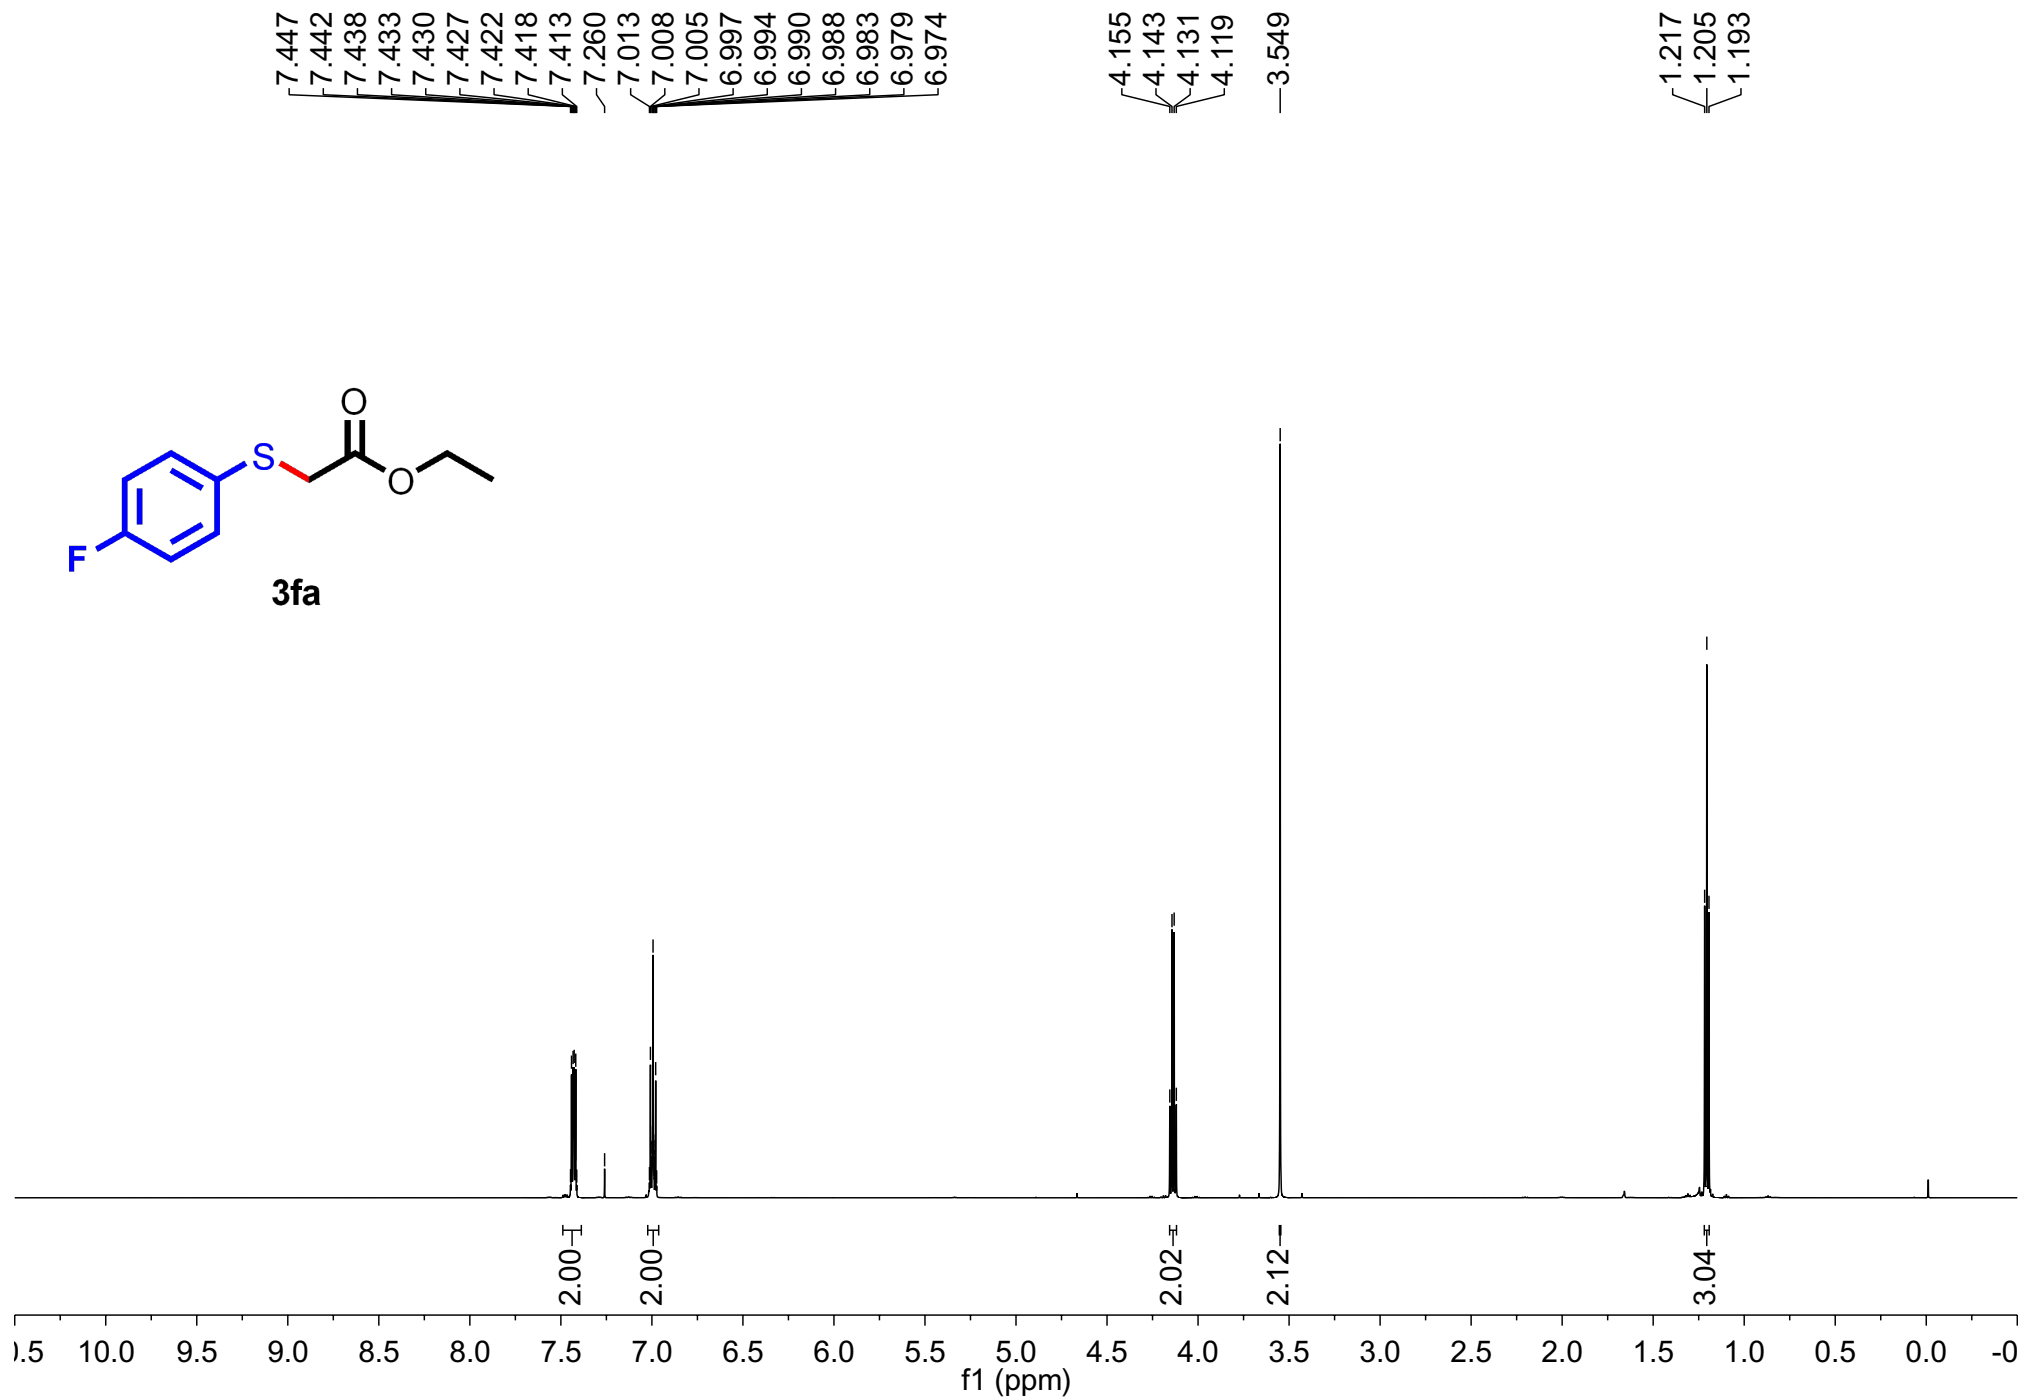



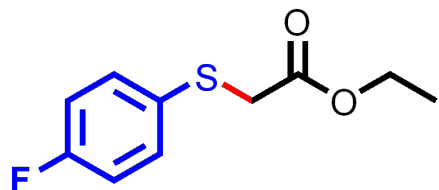

3fa

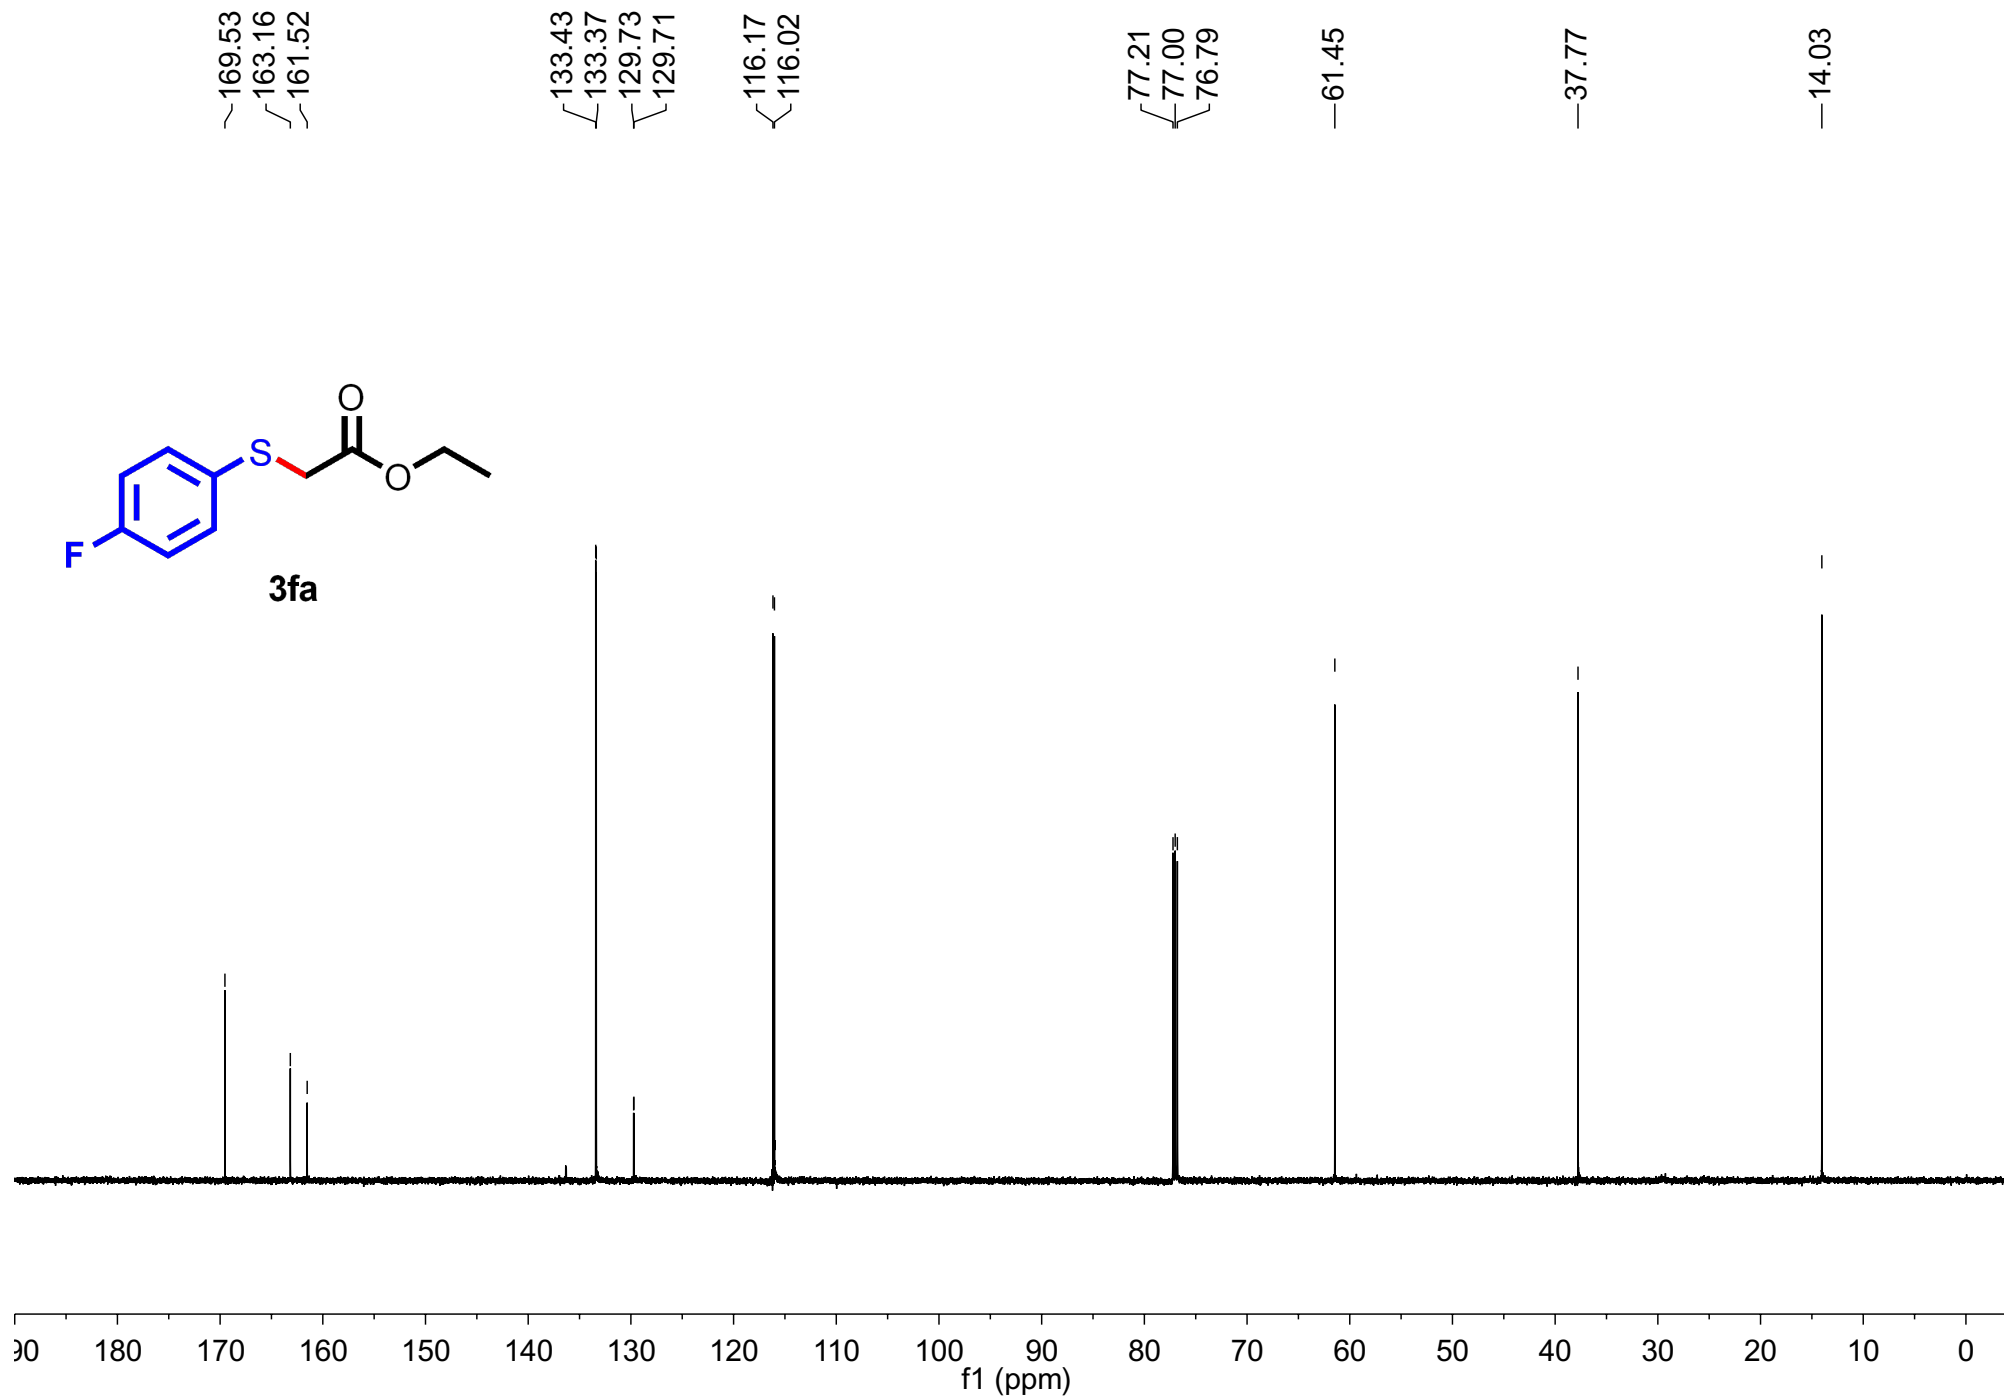

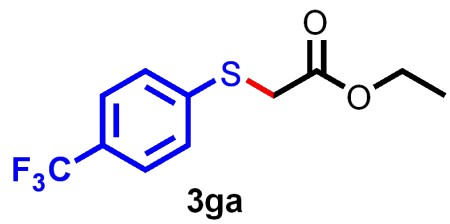

7.542  
7.528  
7.454  
7.441  
7.260

4.209  
4.197  
4.185  
4.173  
3.701

1.253  
1.241  
1.230

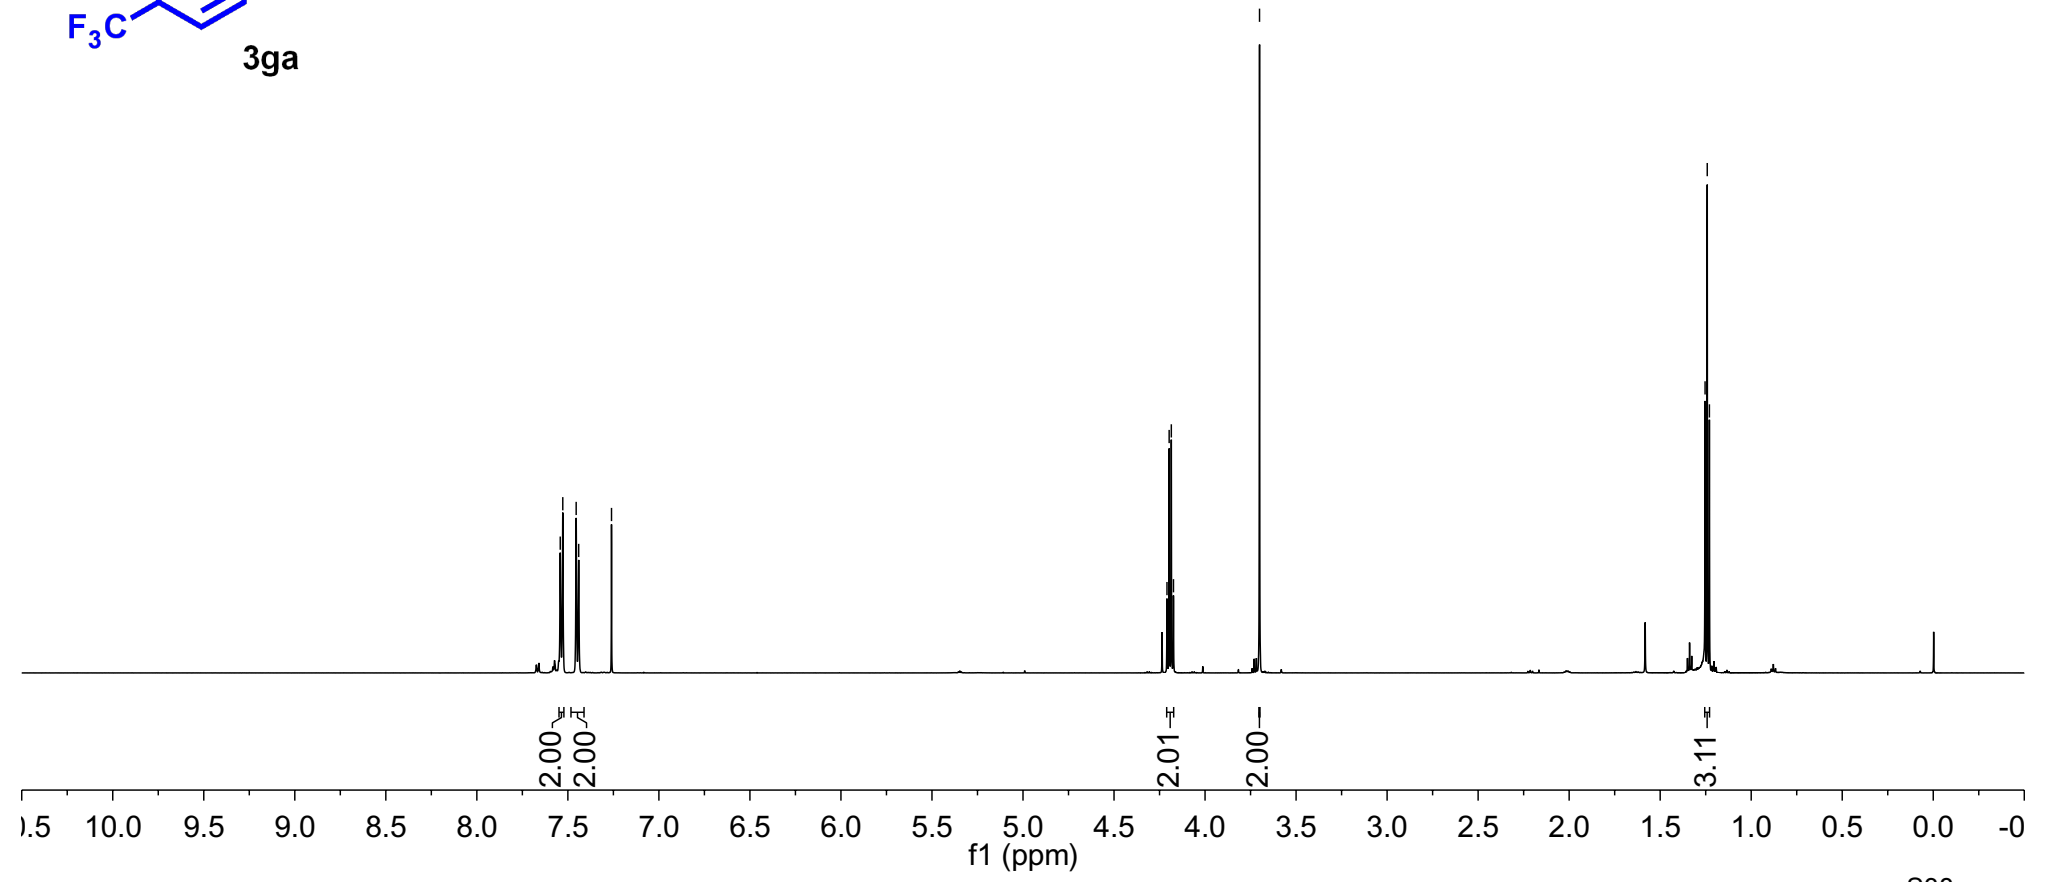

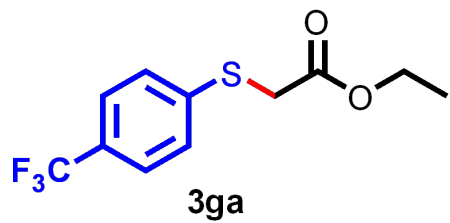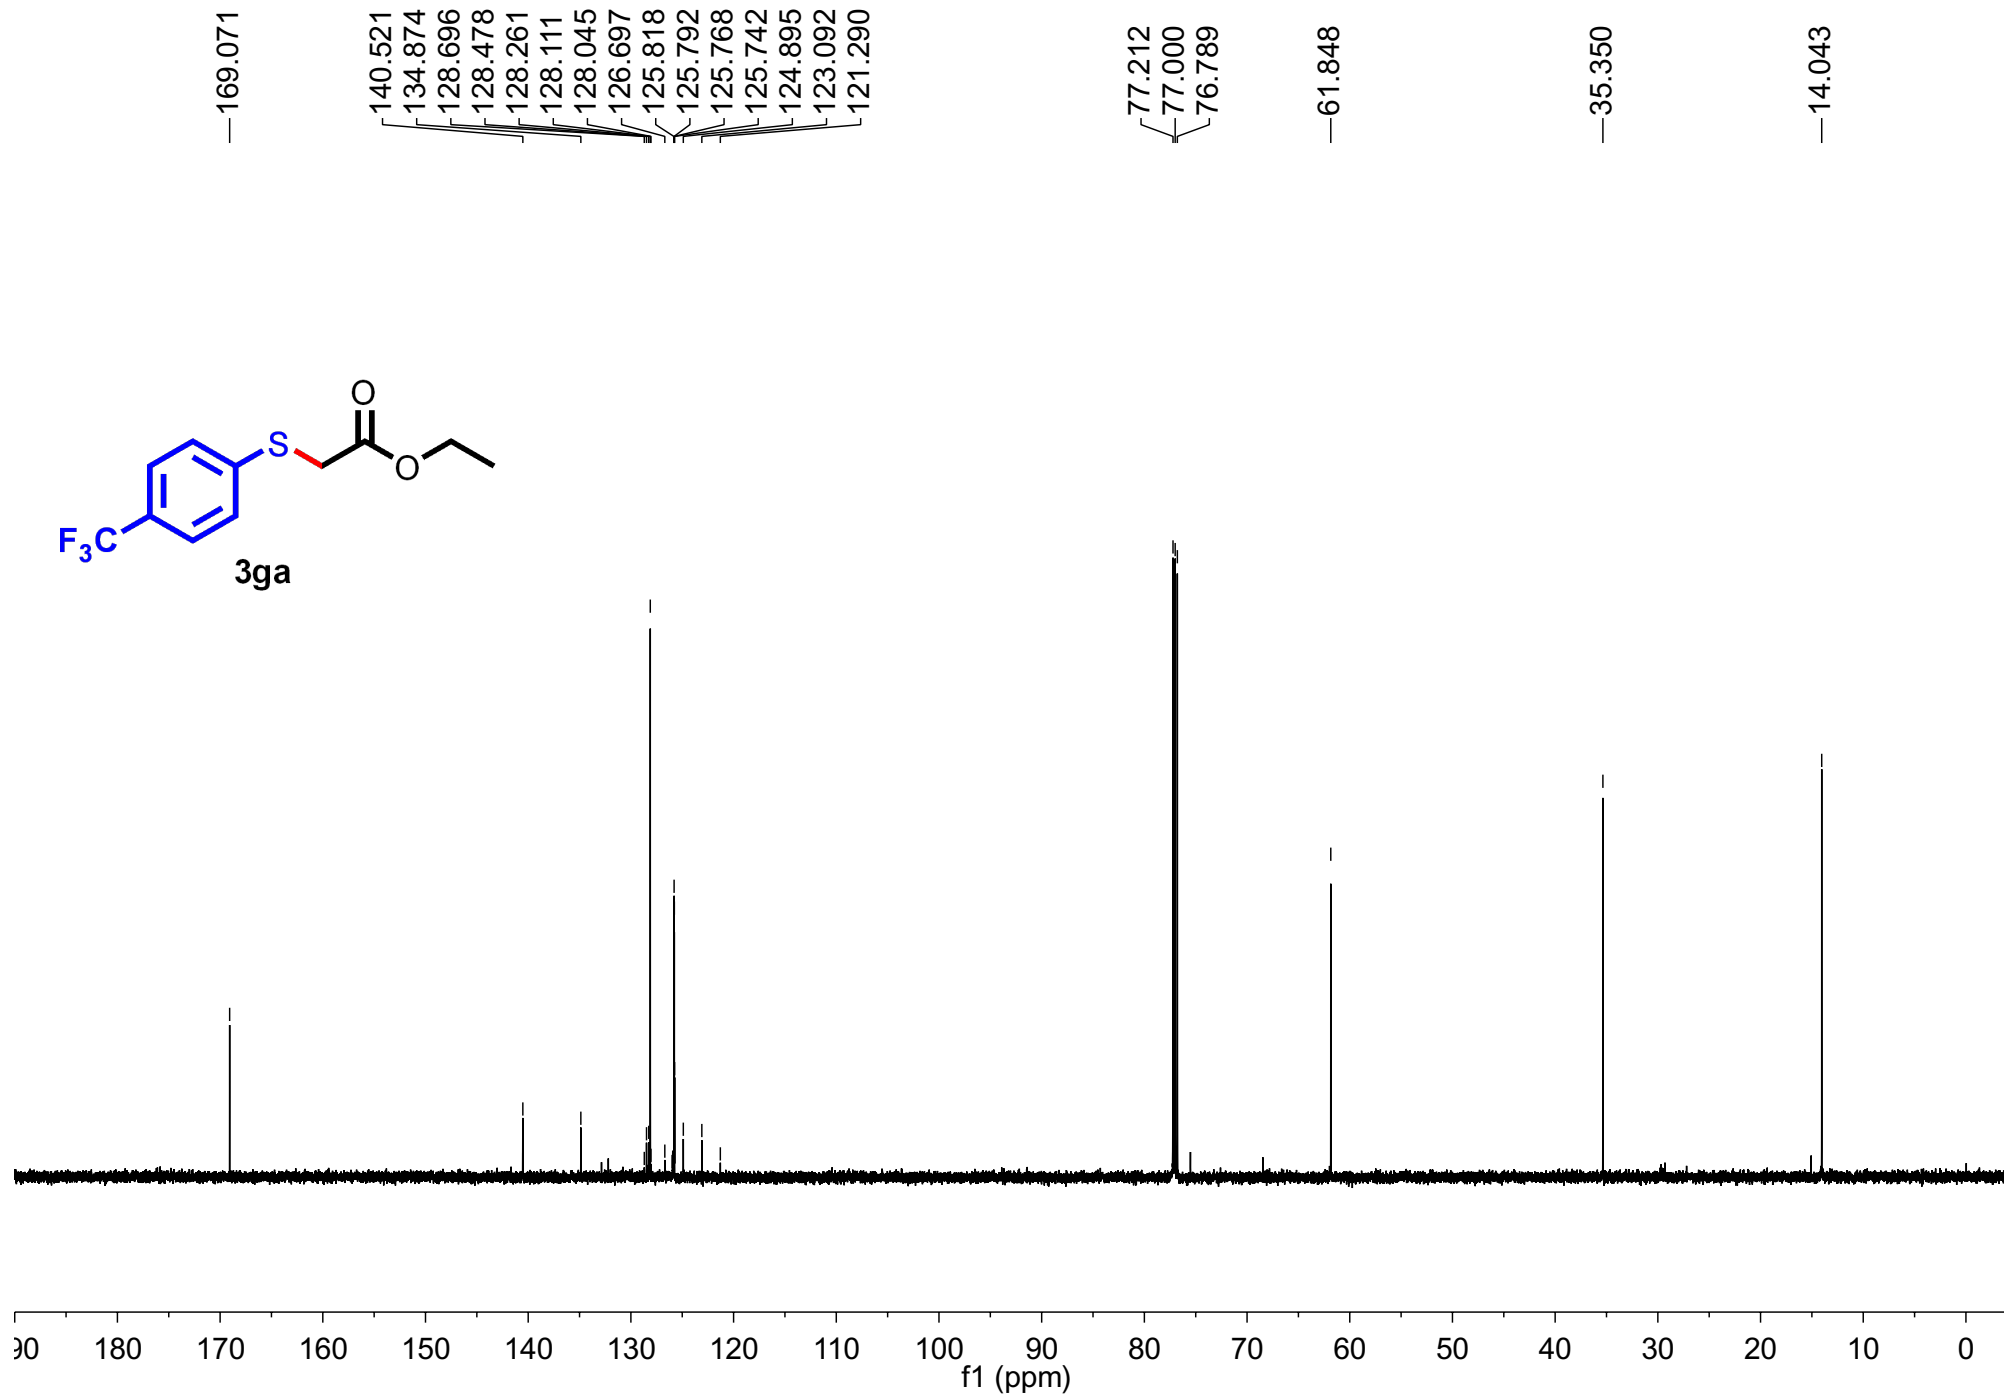

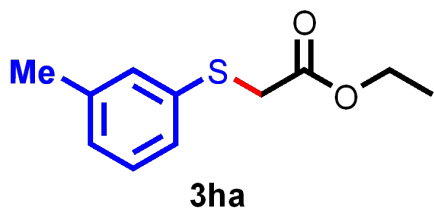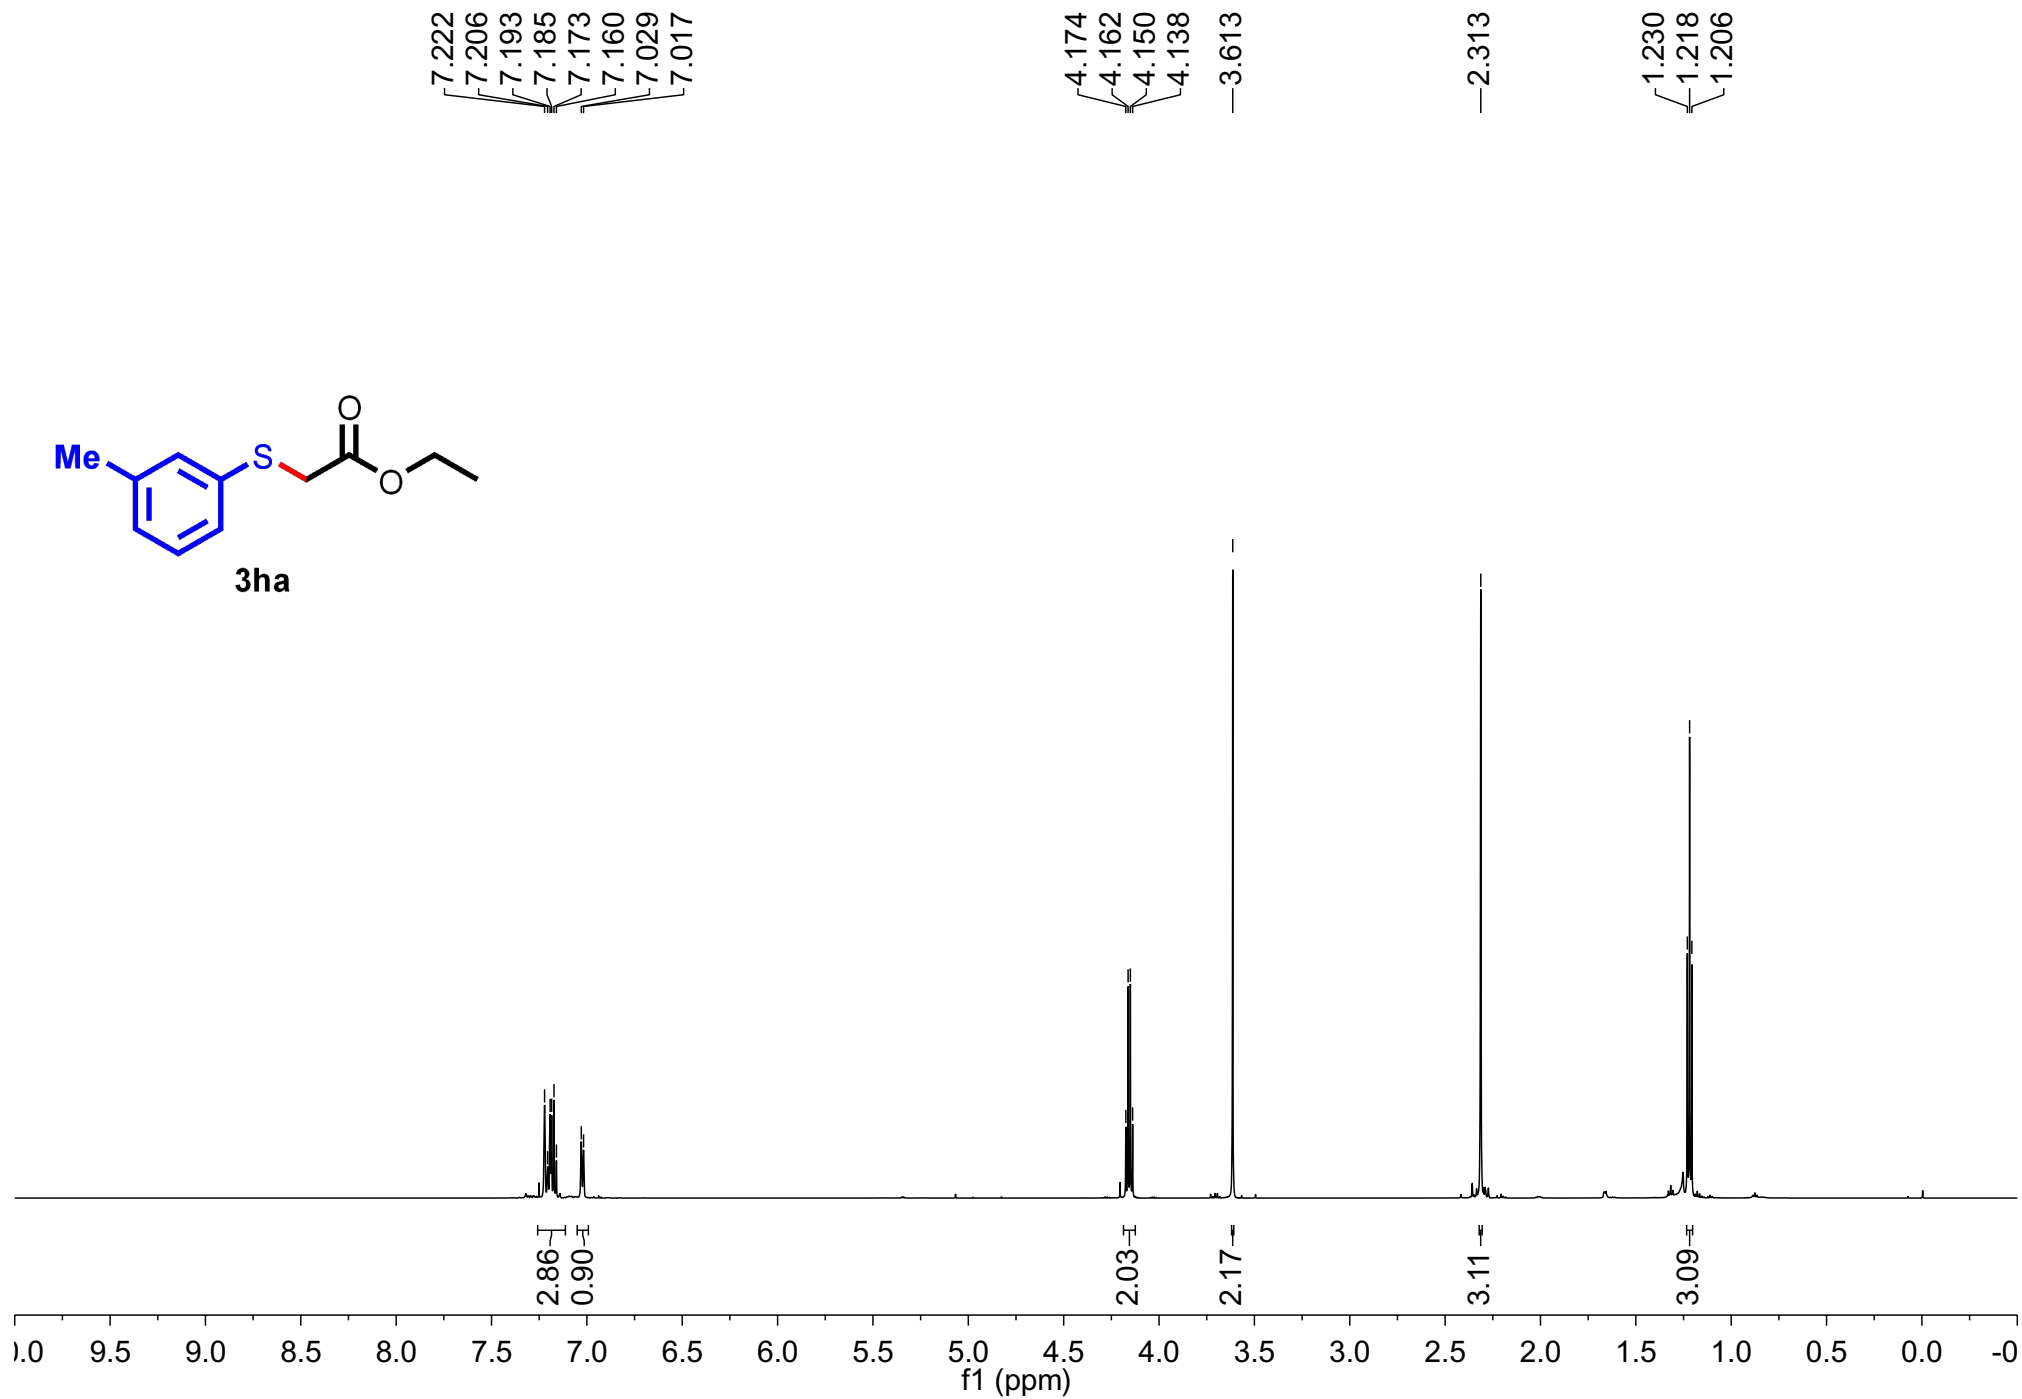

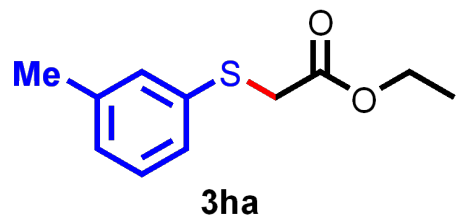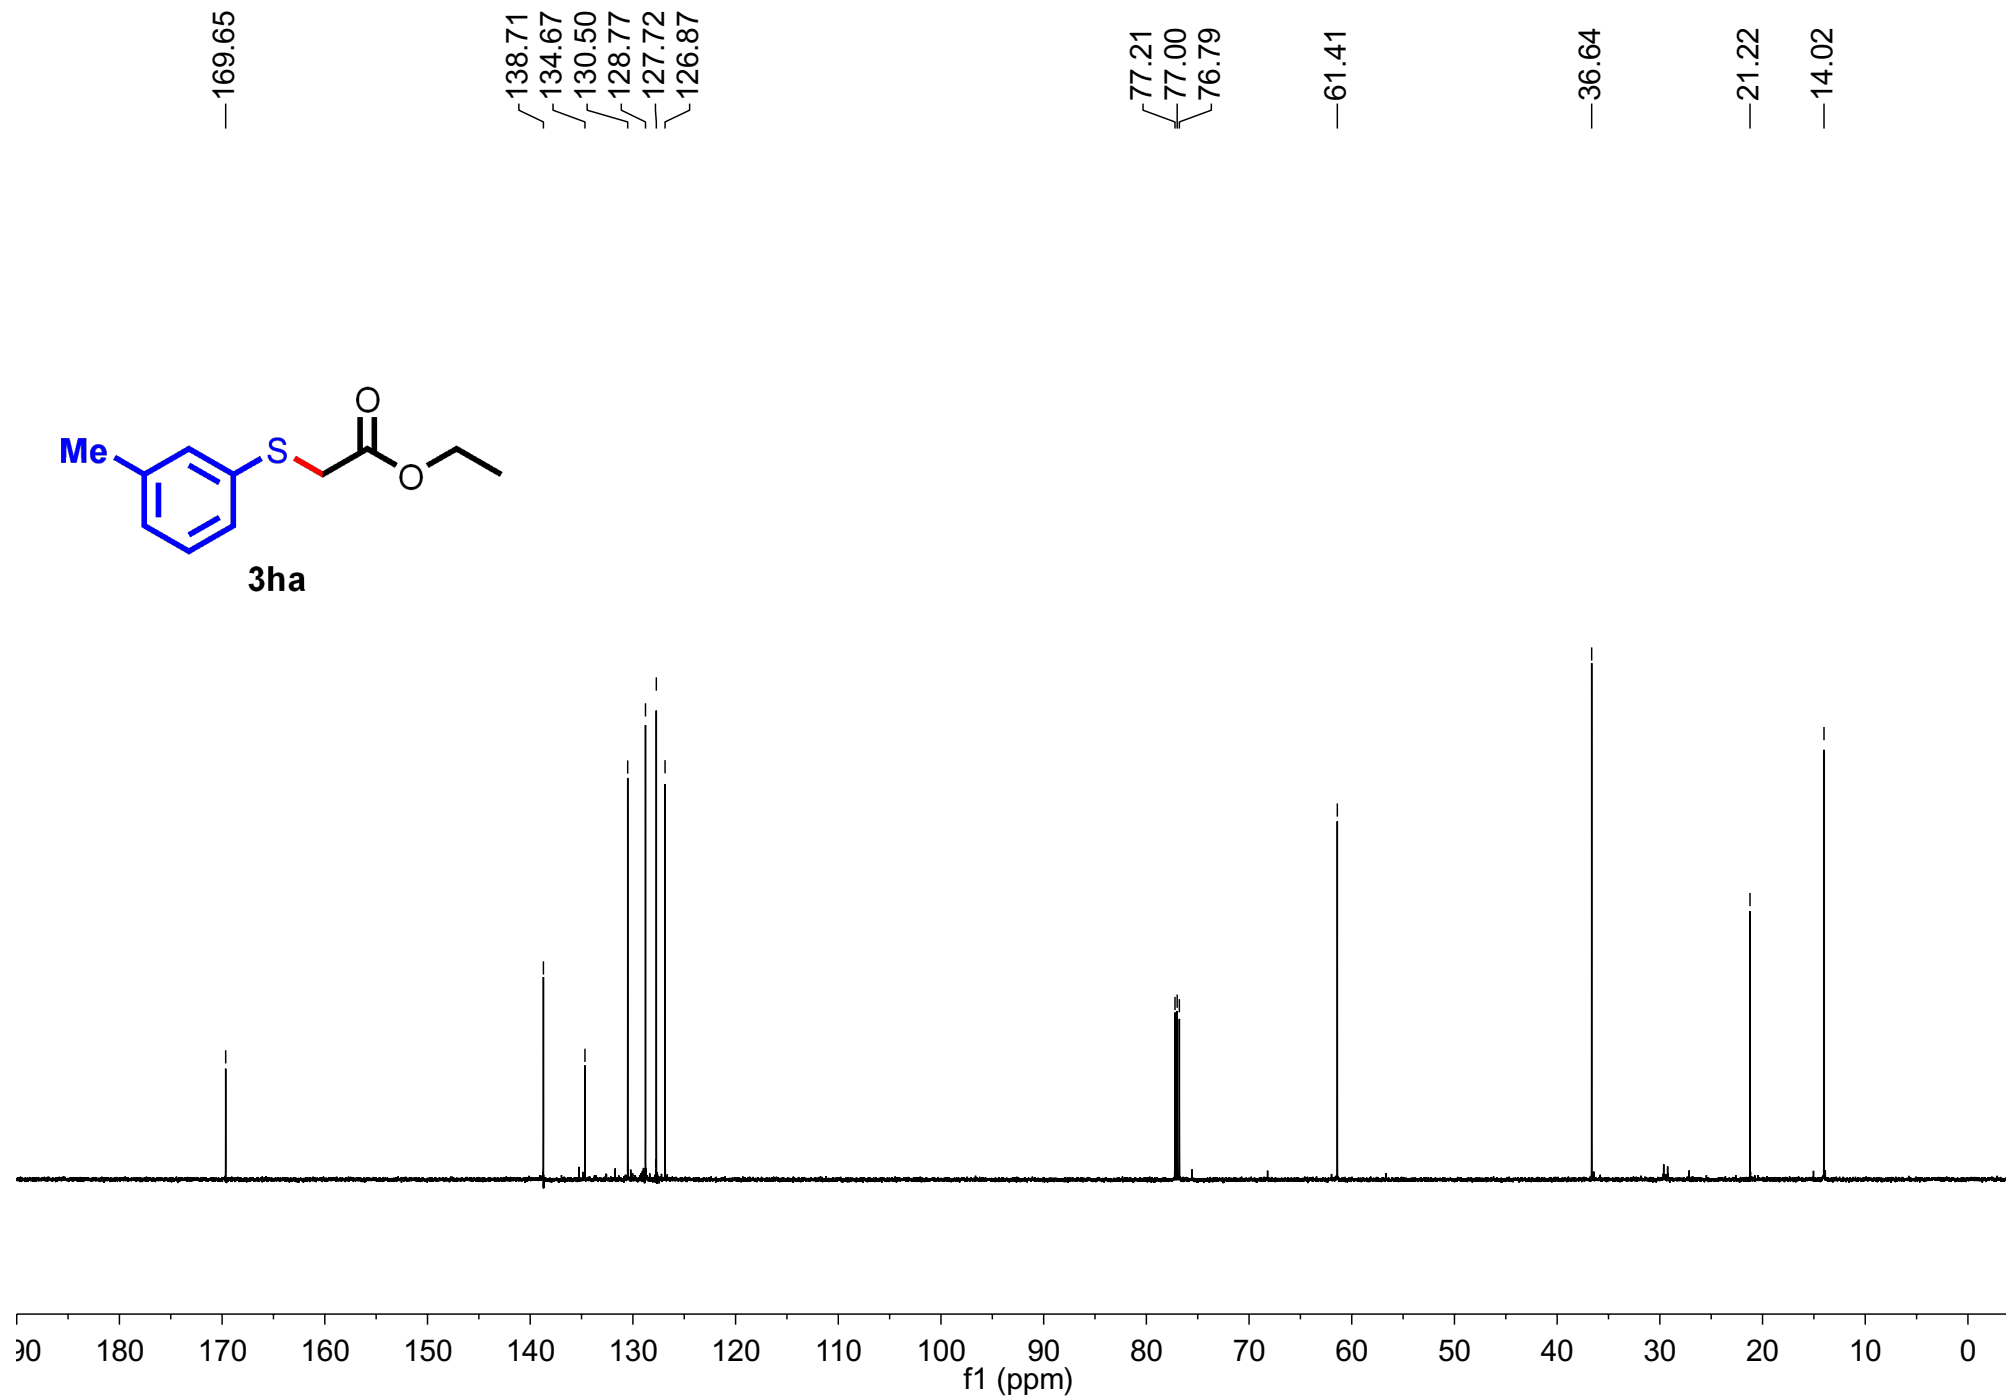

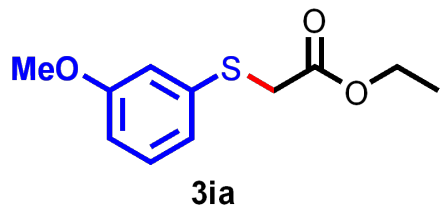

7.260  
7.213  
7.199  
7.186  
6.974  
6.959  
6.955  
6.952  
6.766  
6.762  
6.752  
6.748

4.189  
4.177  
4.165  
4.153  
3.786  
3.640

1.243  
1.231  
1.219

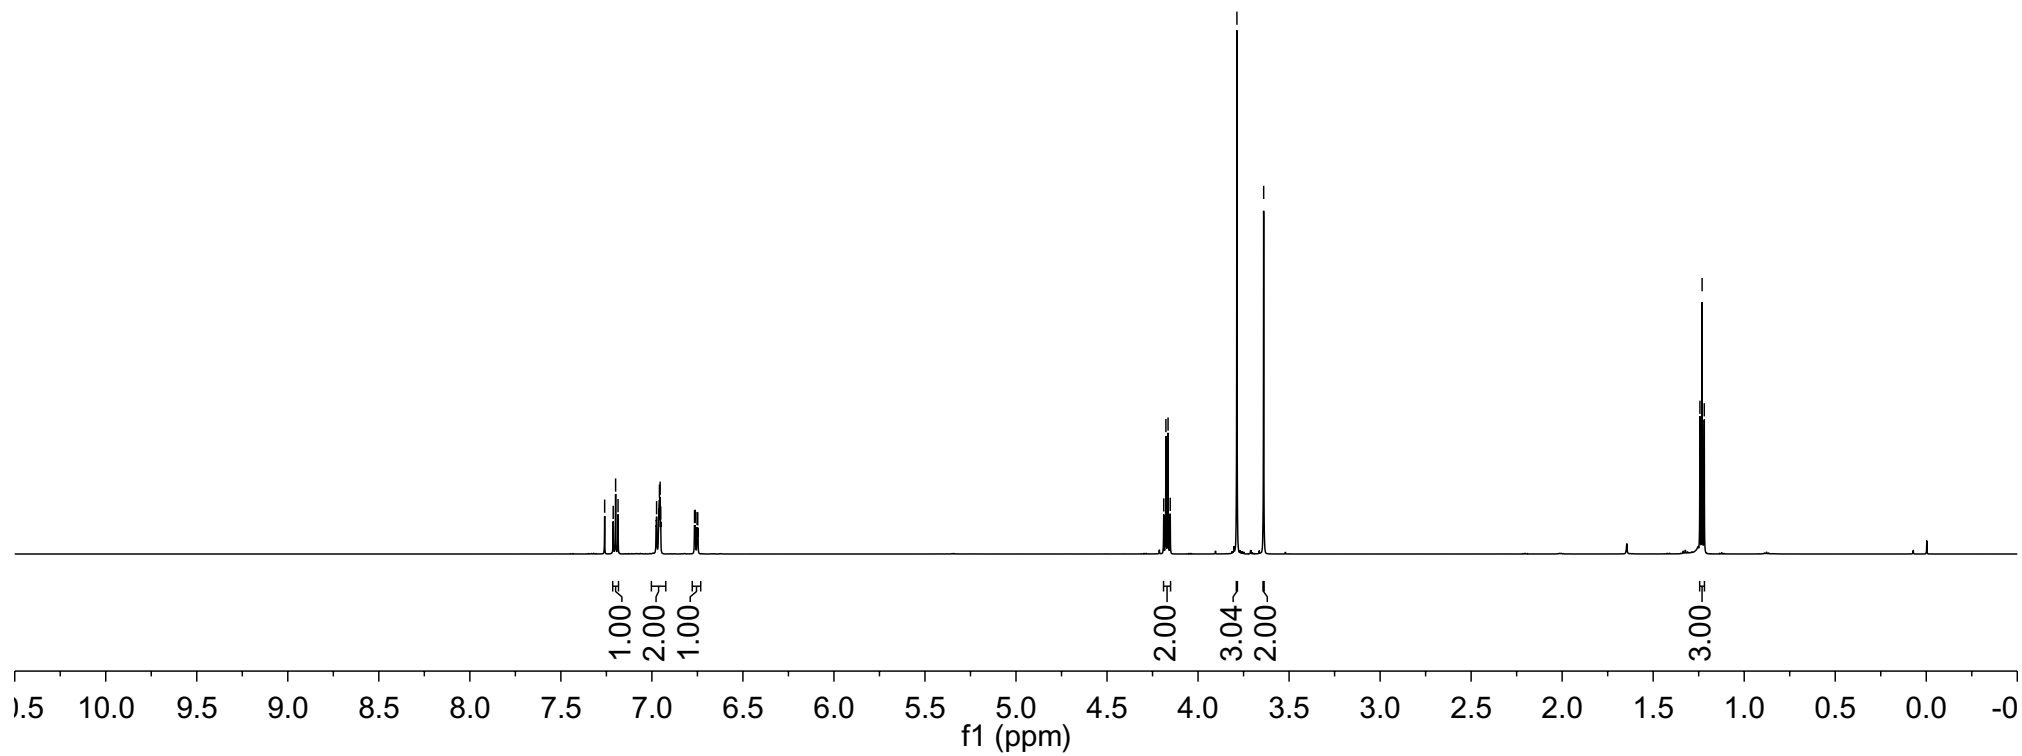

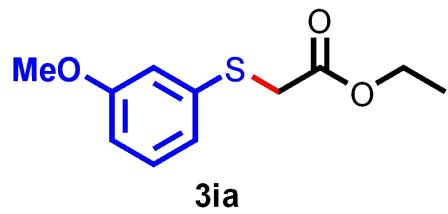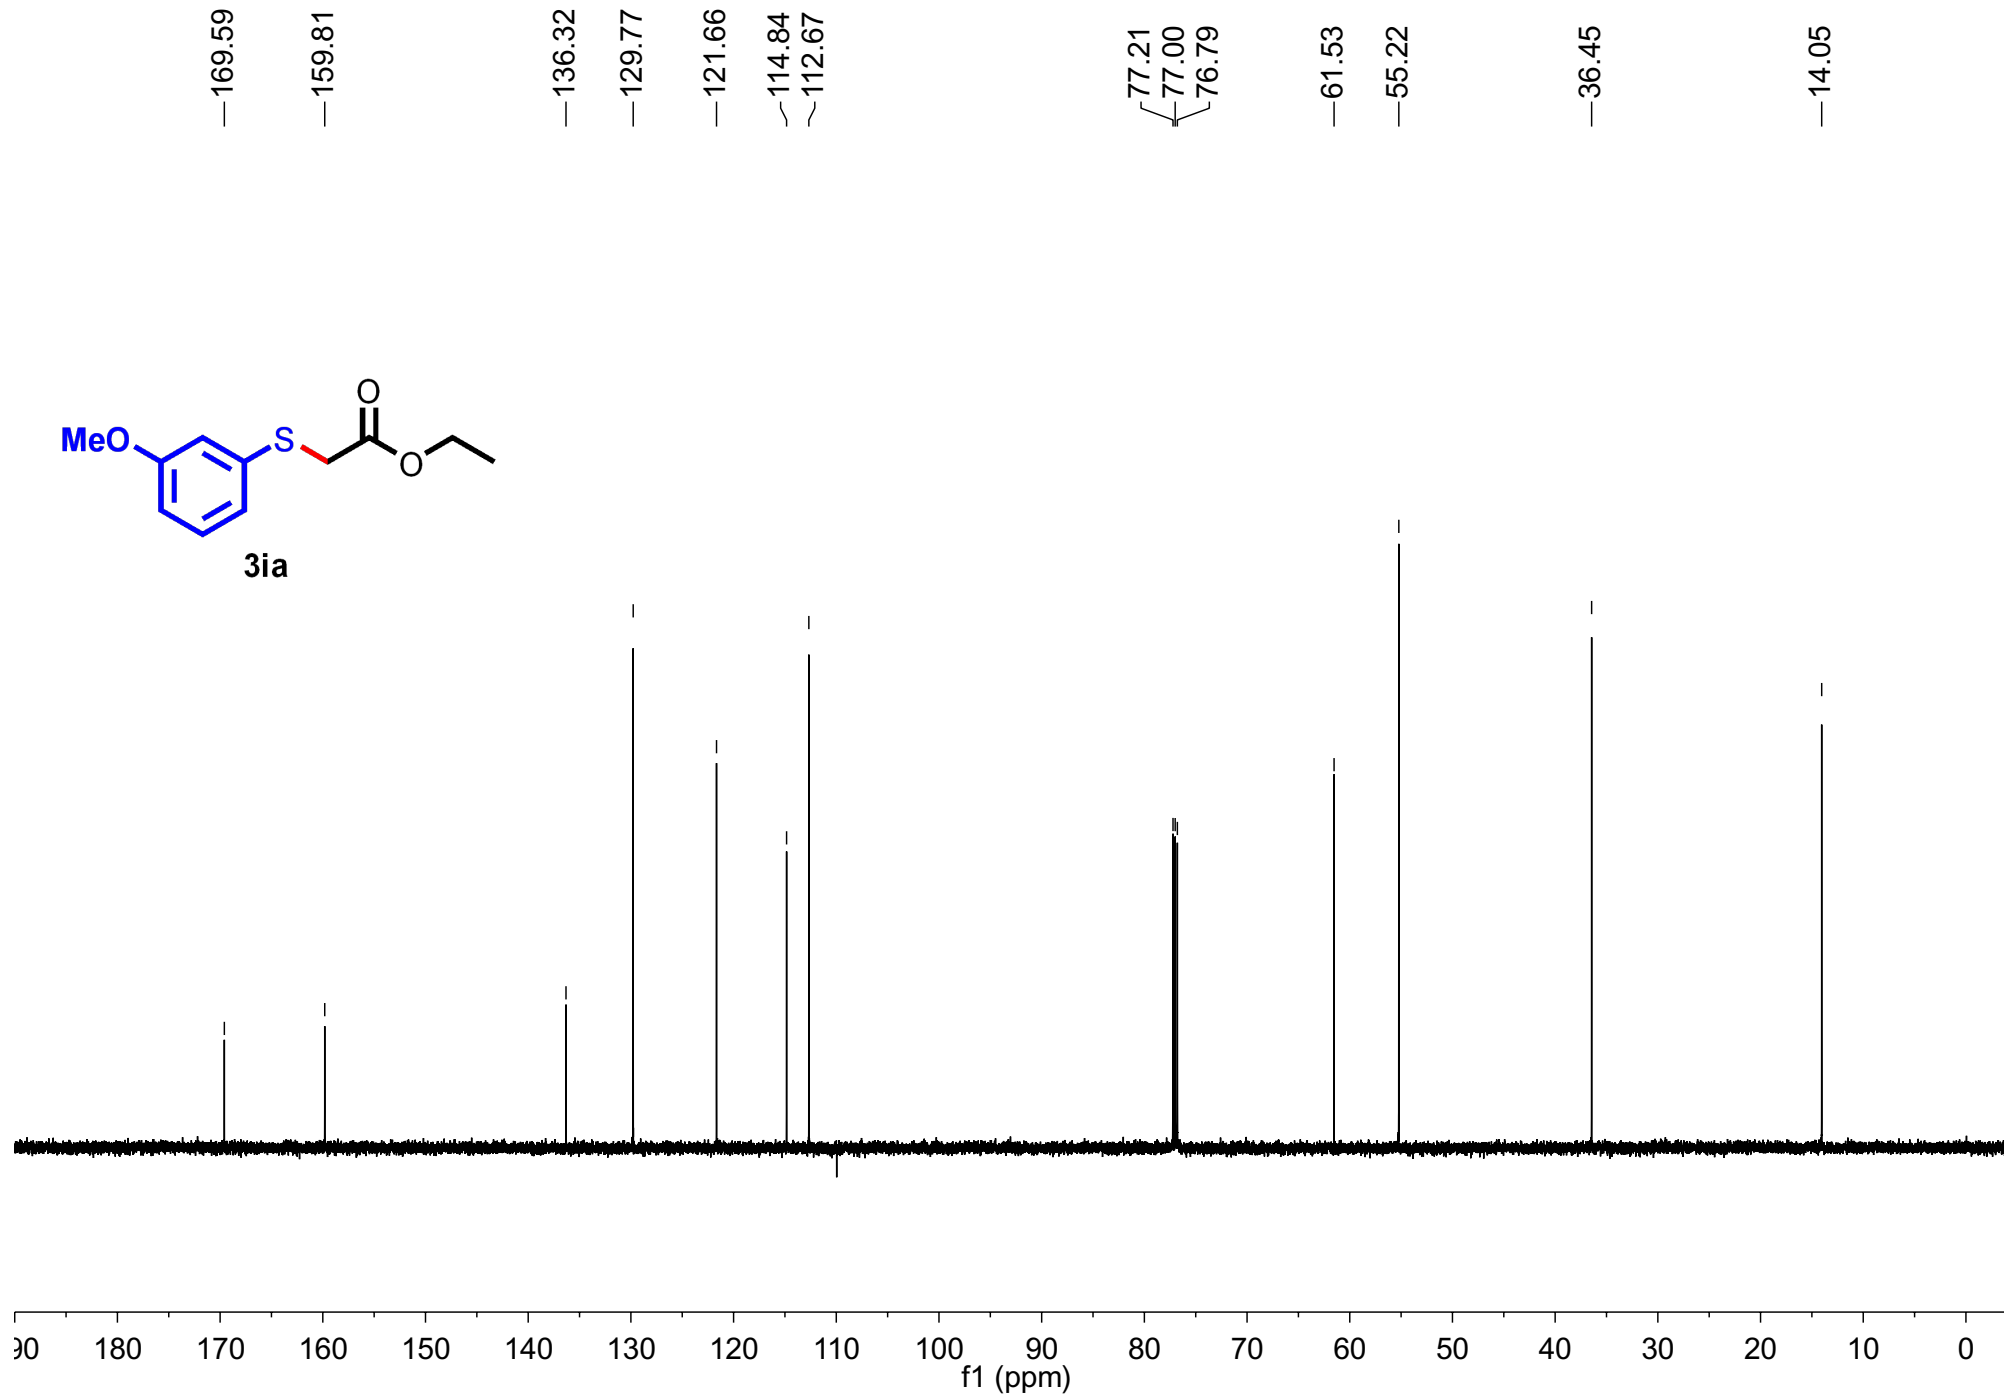

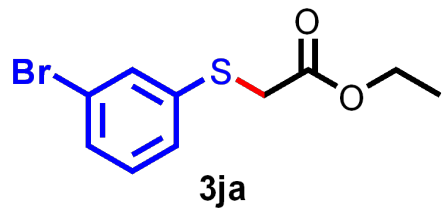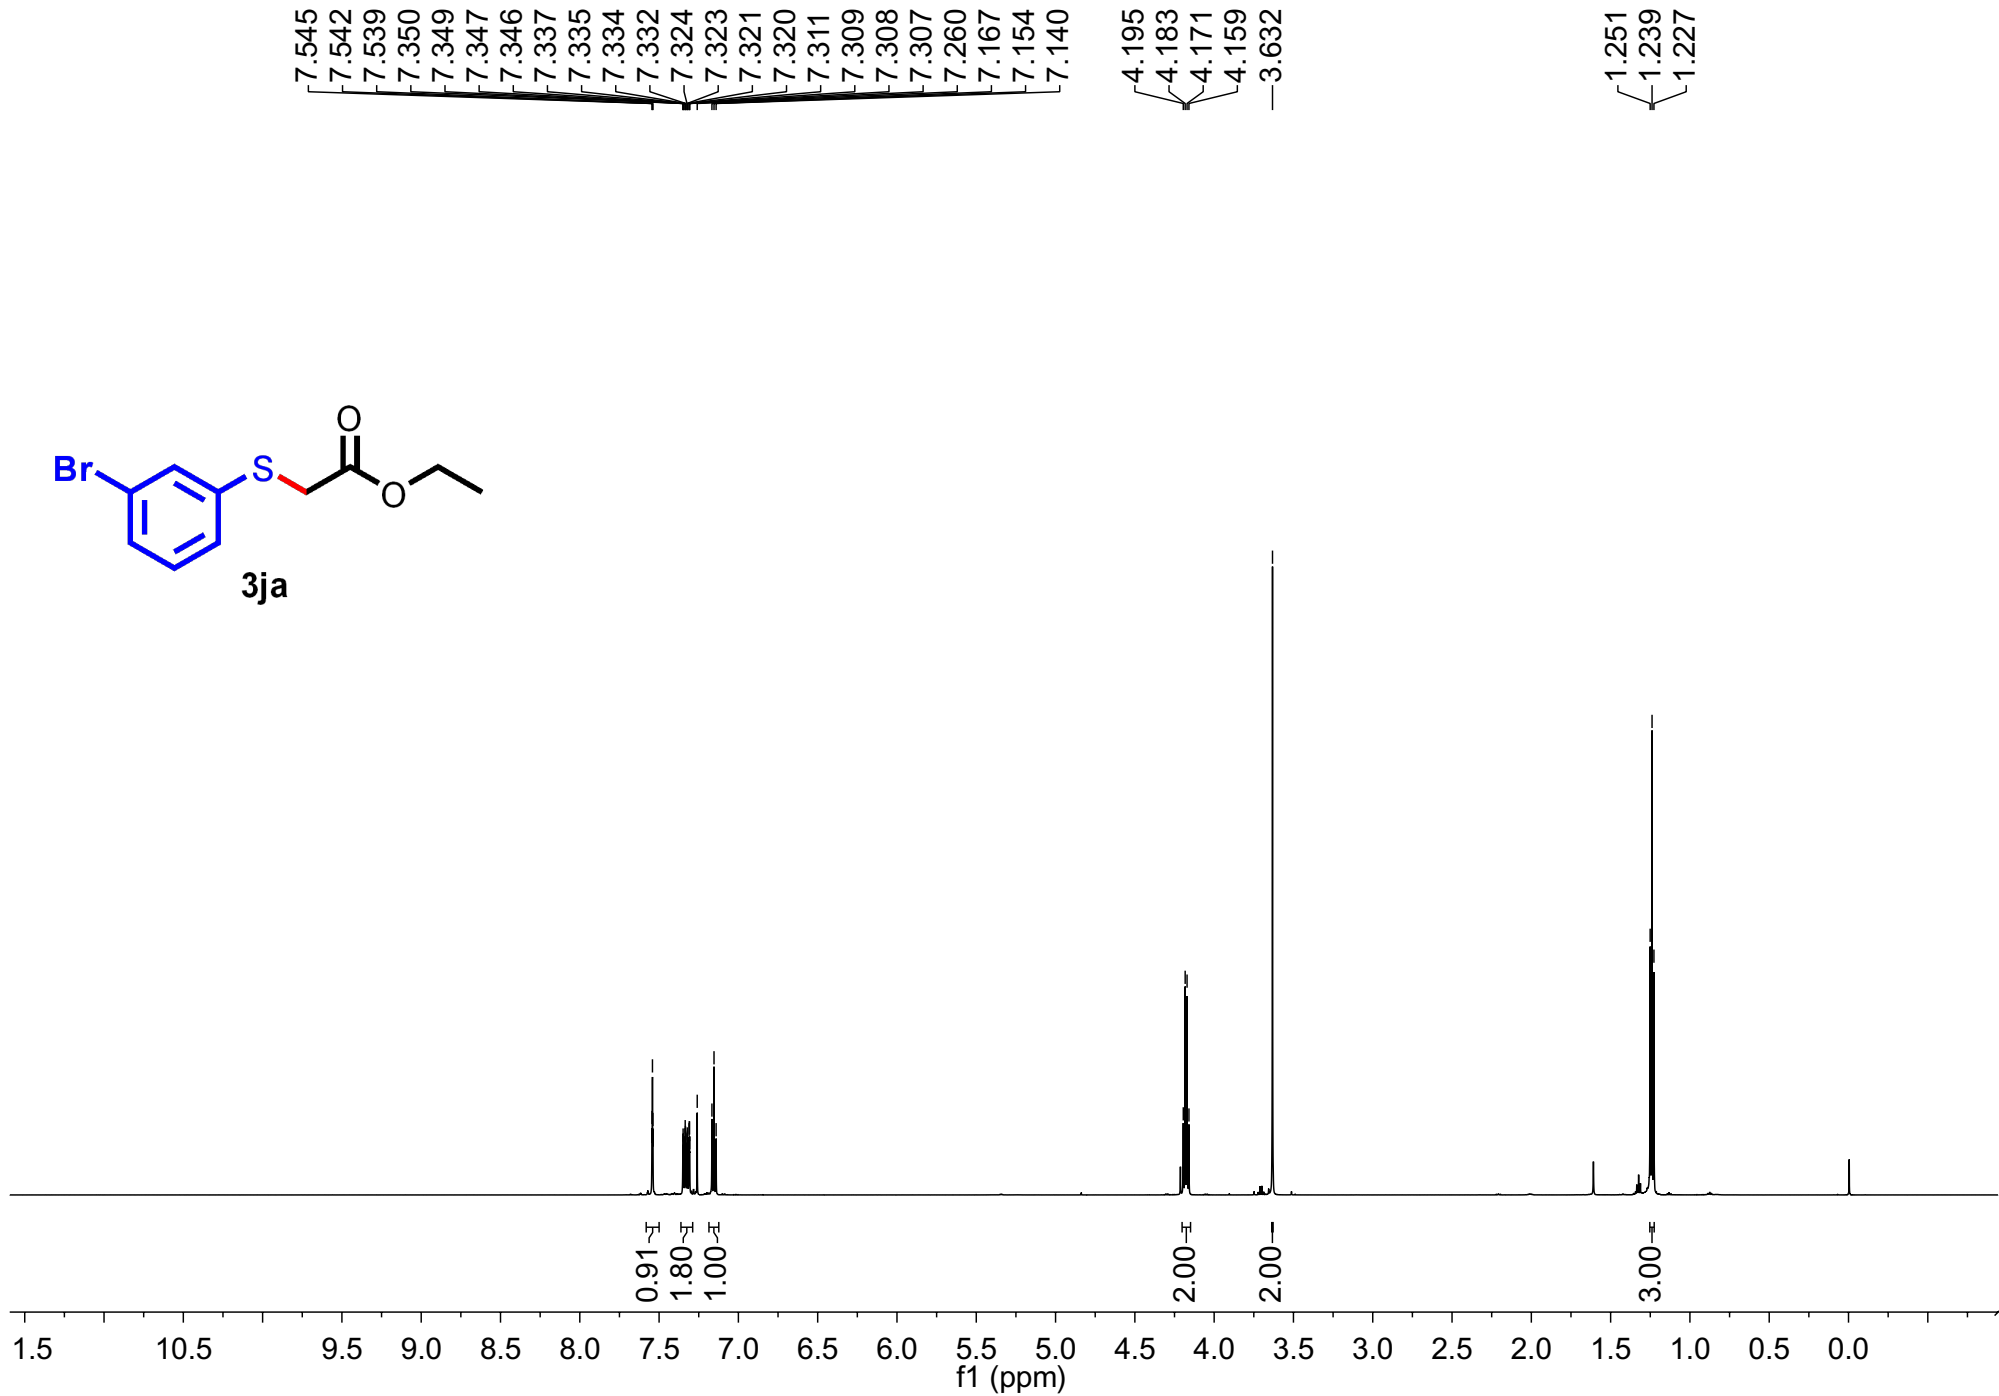



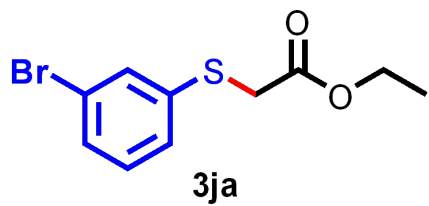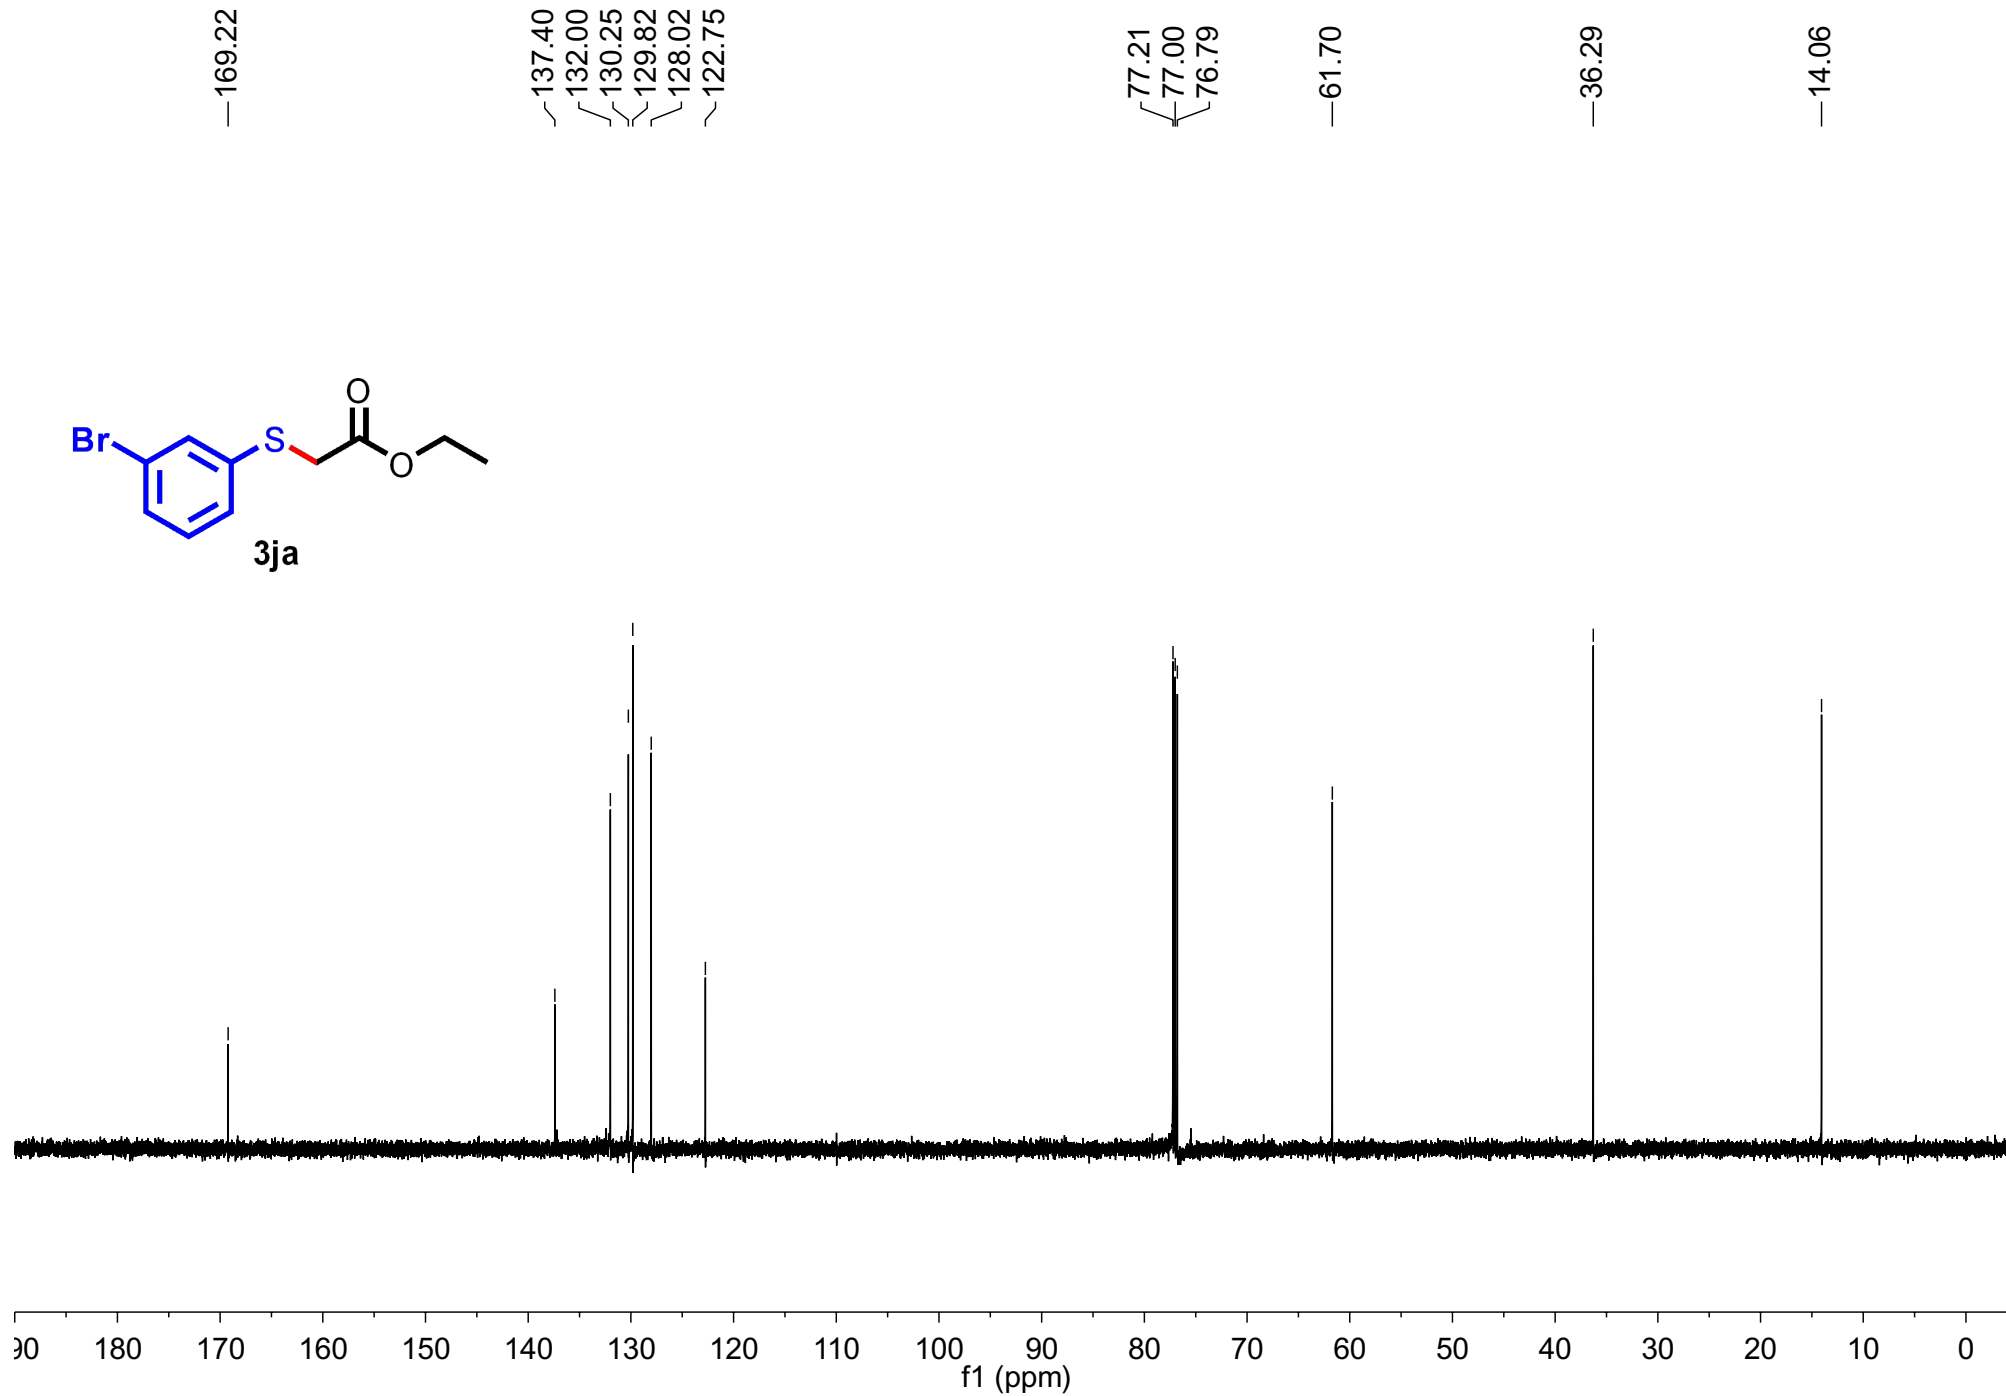

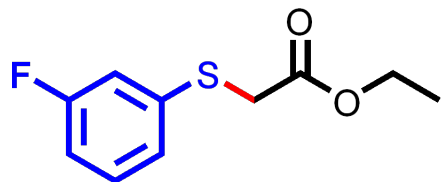

3ka

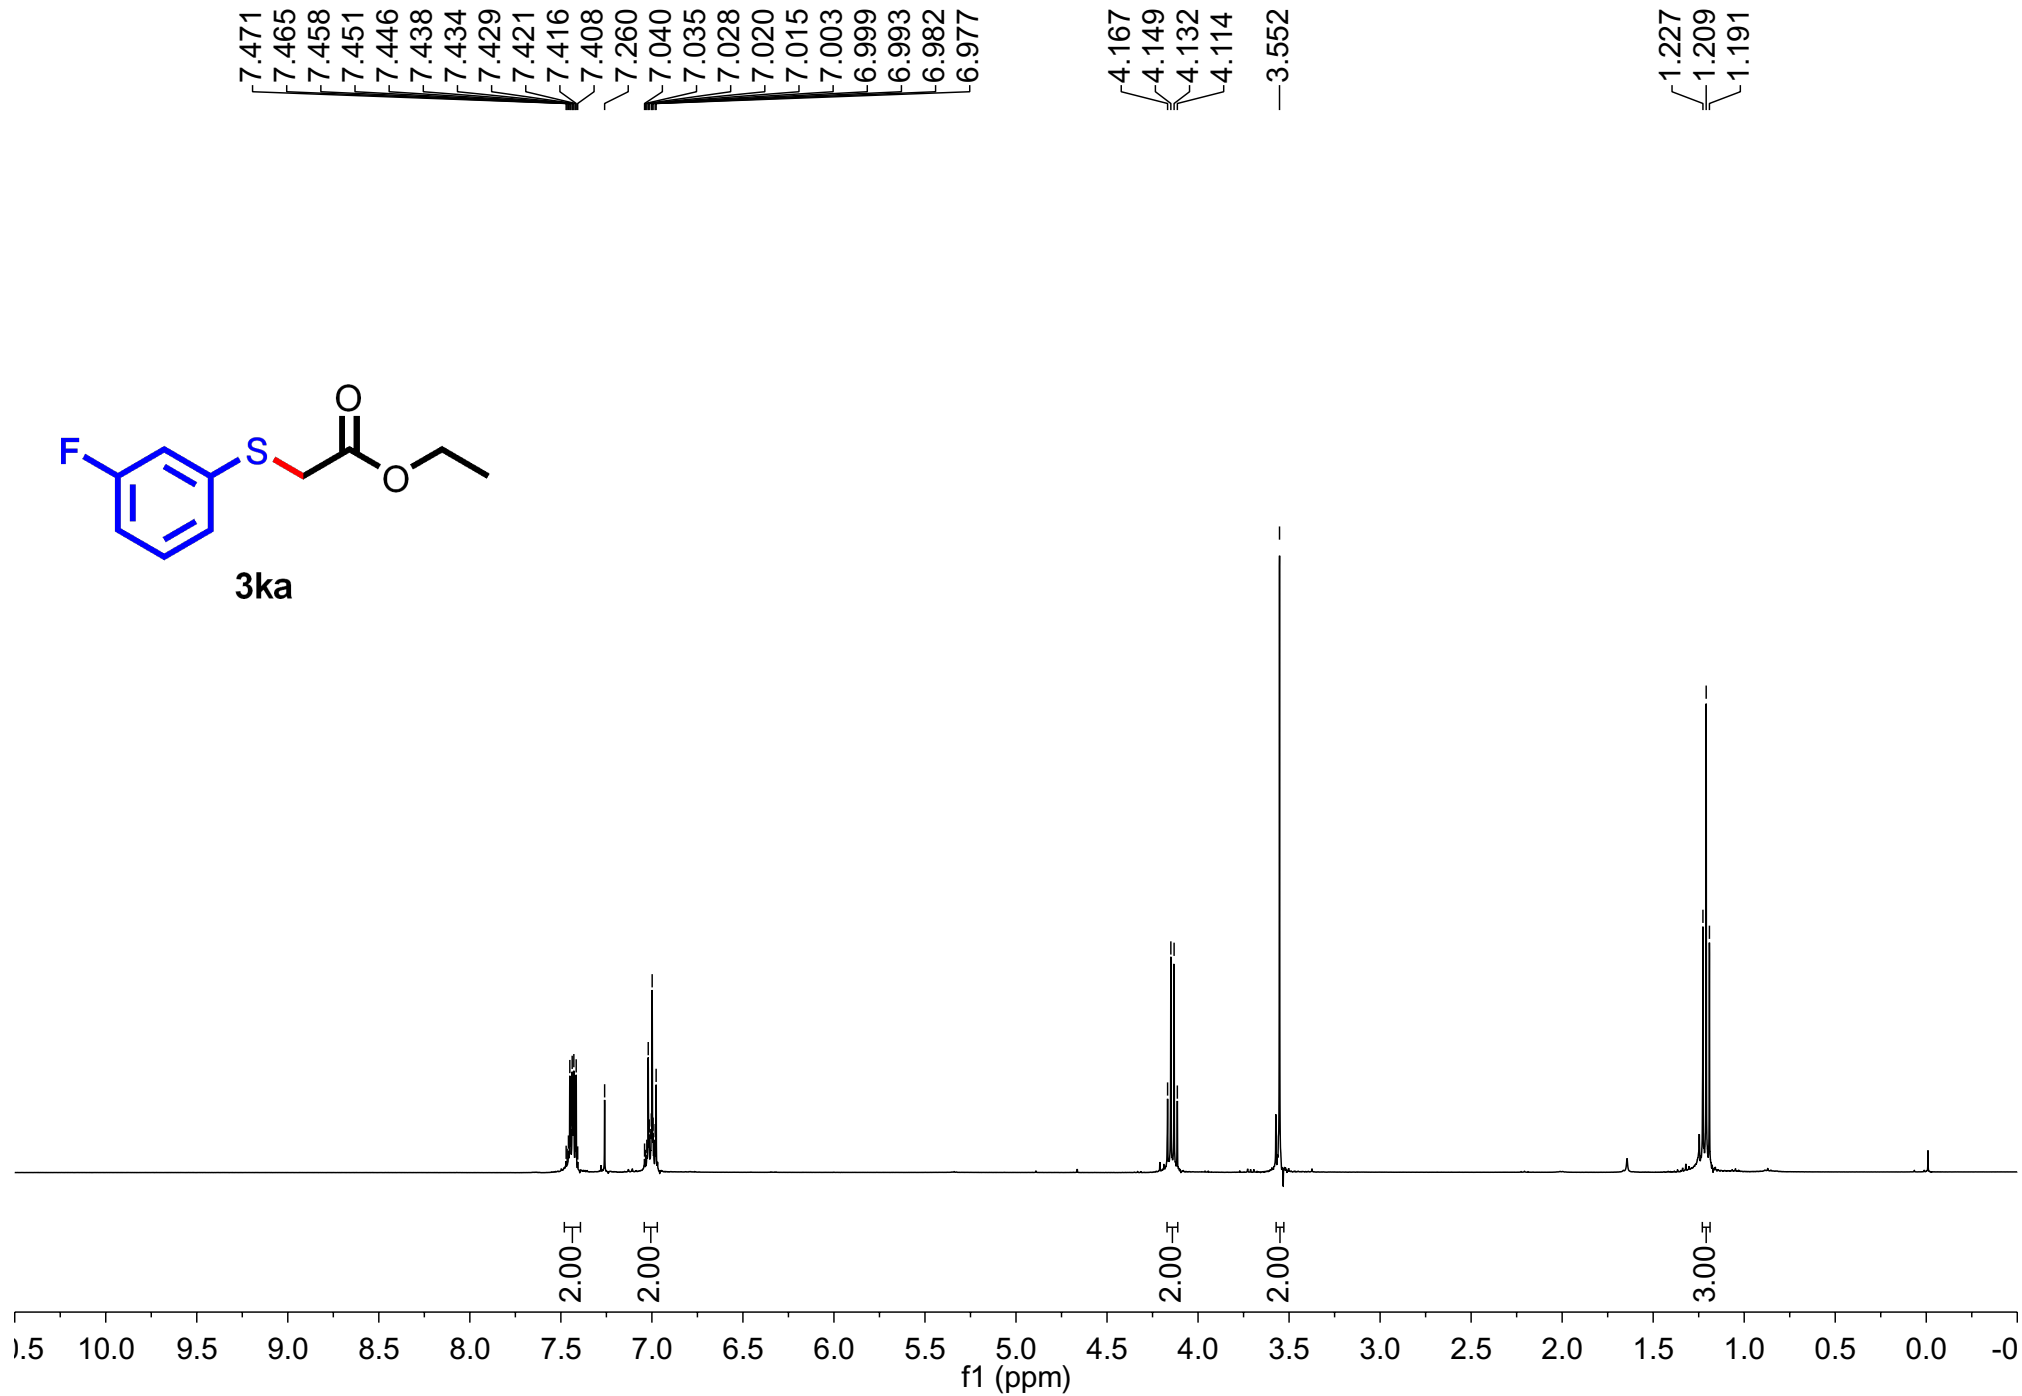

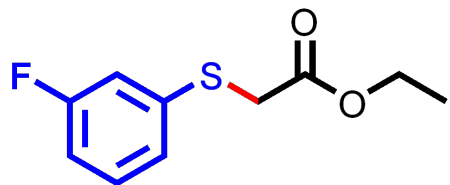

3ka

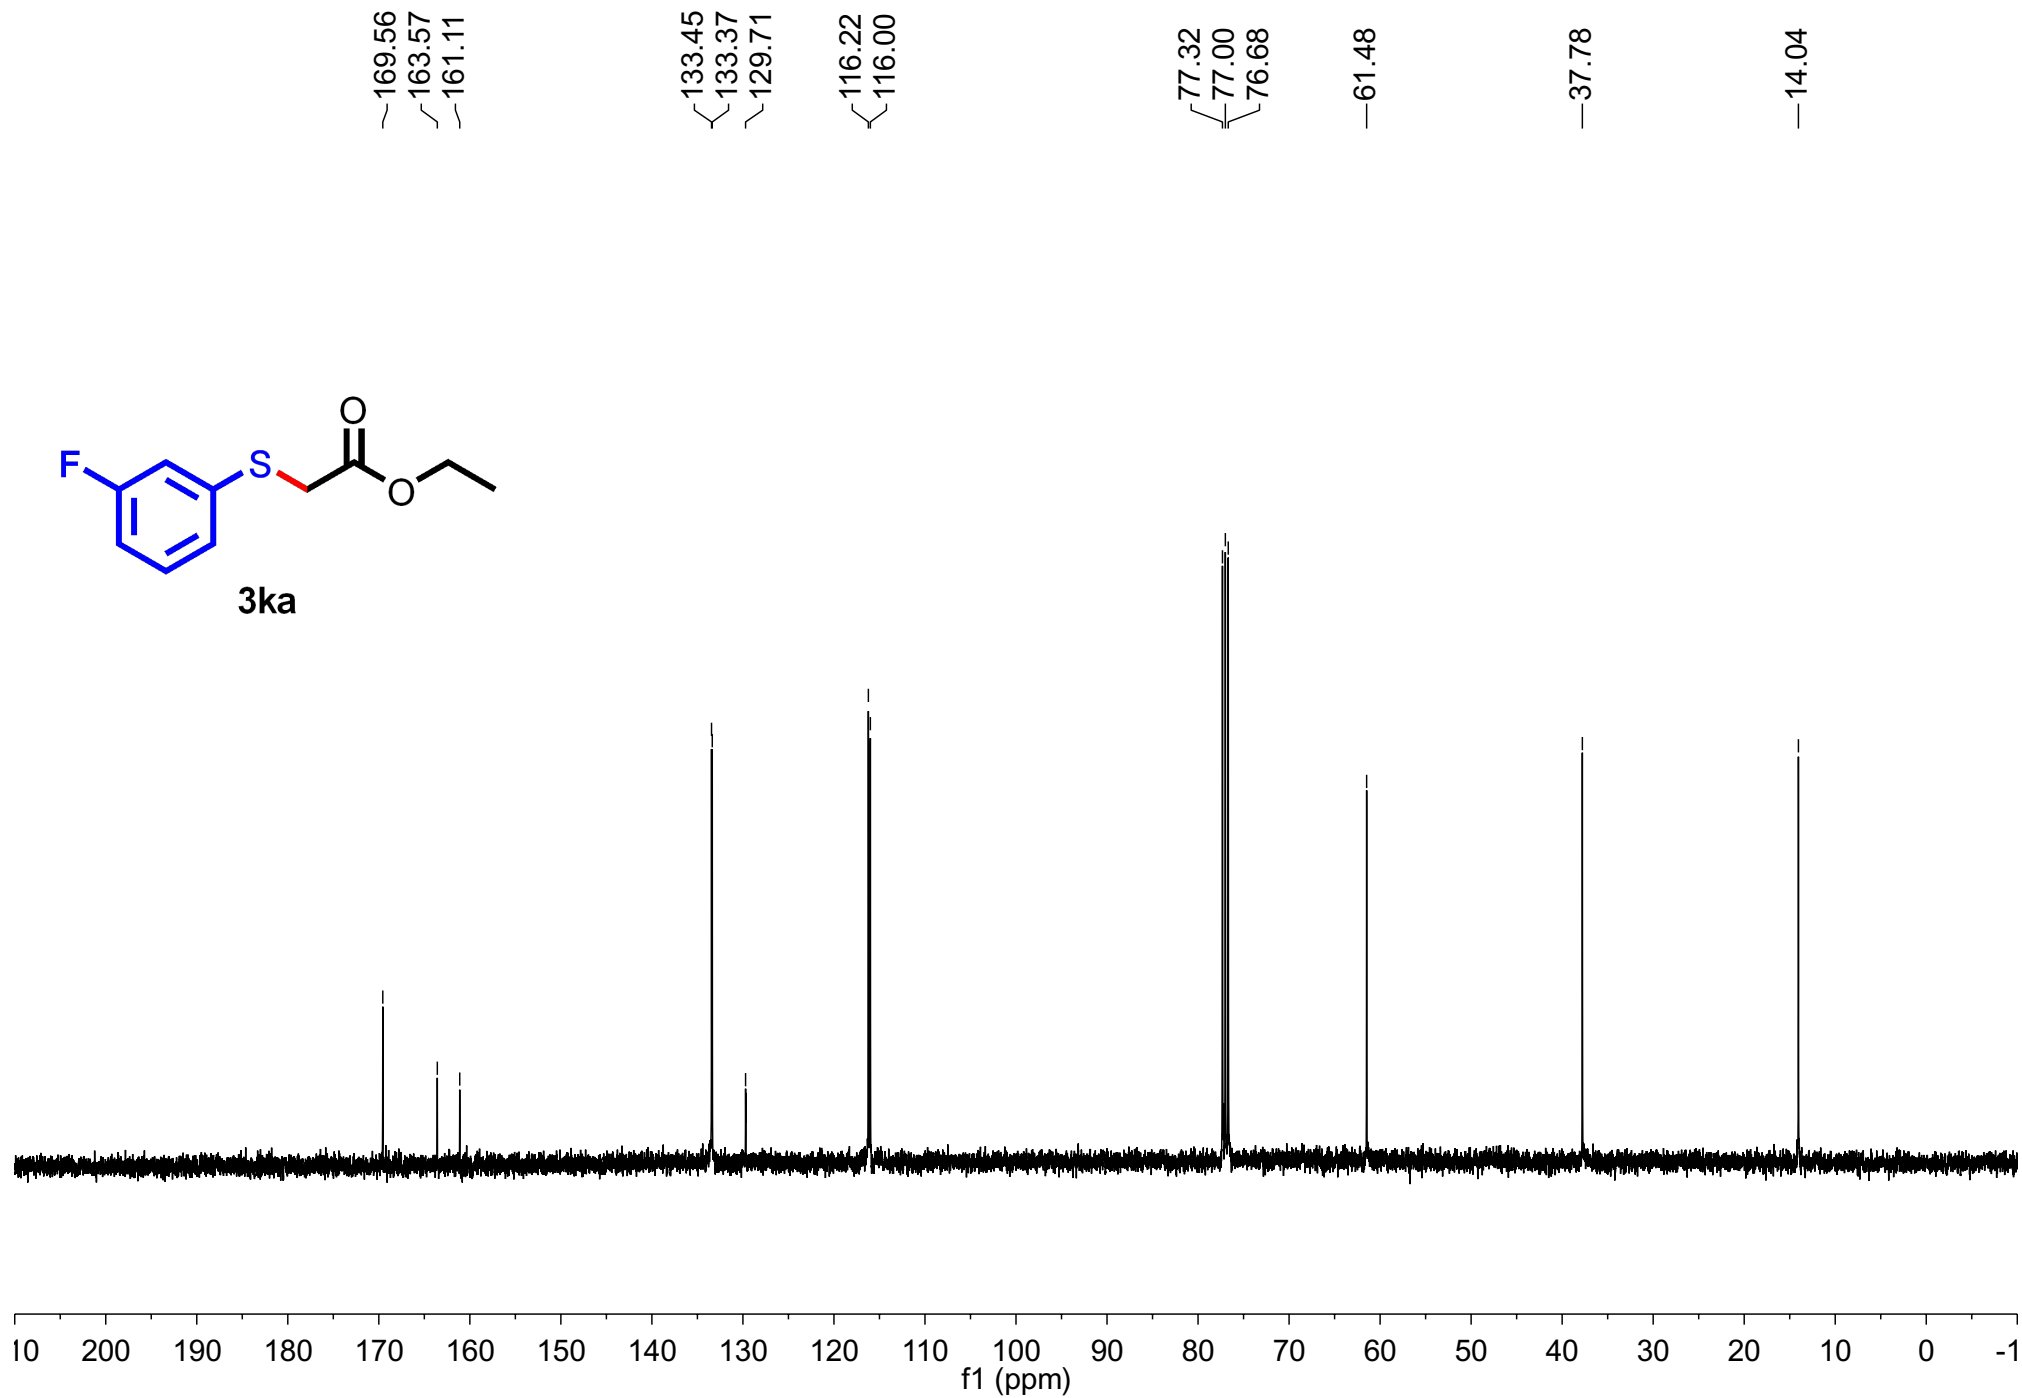

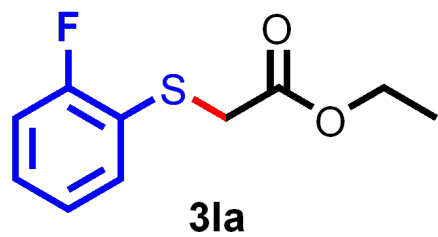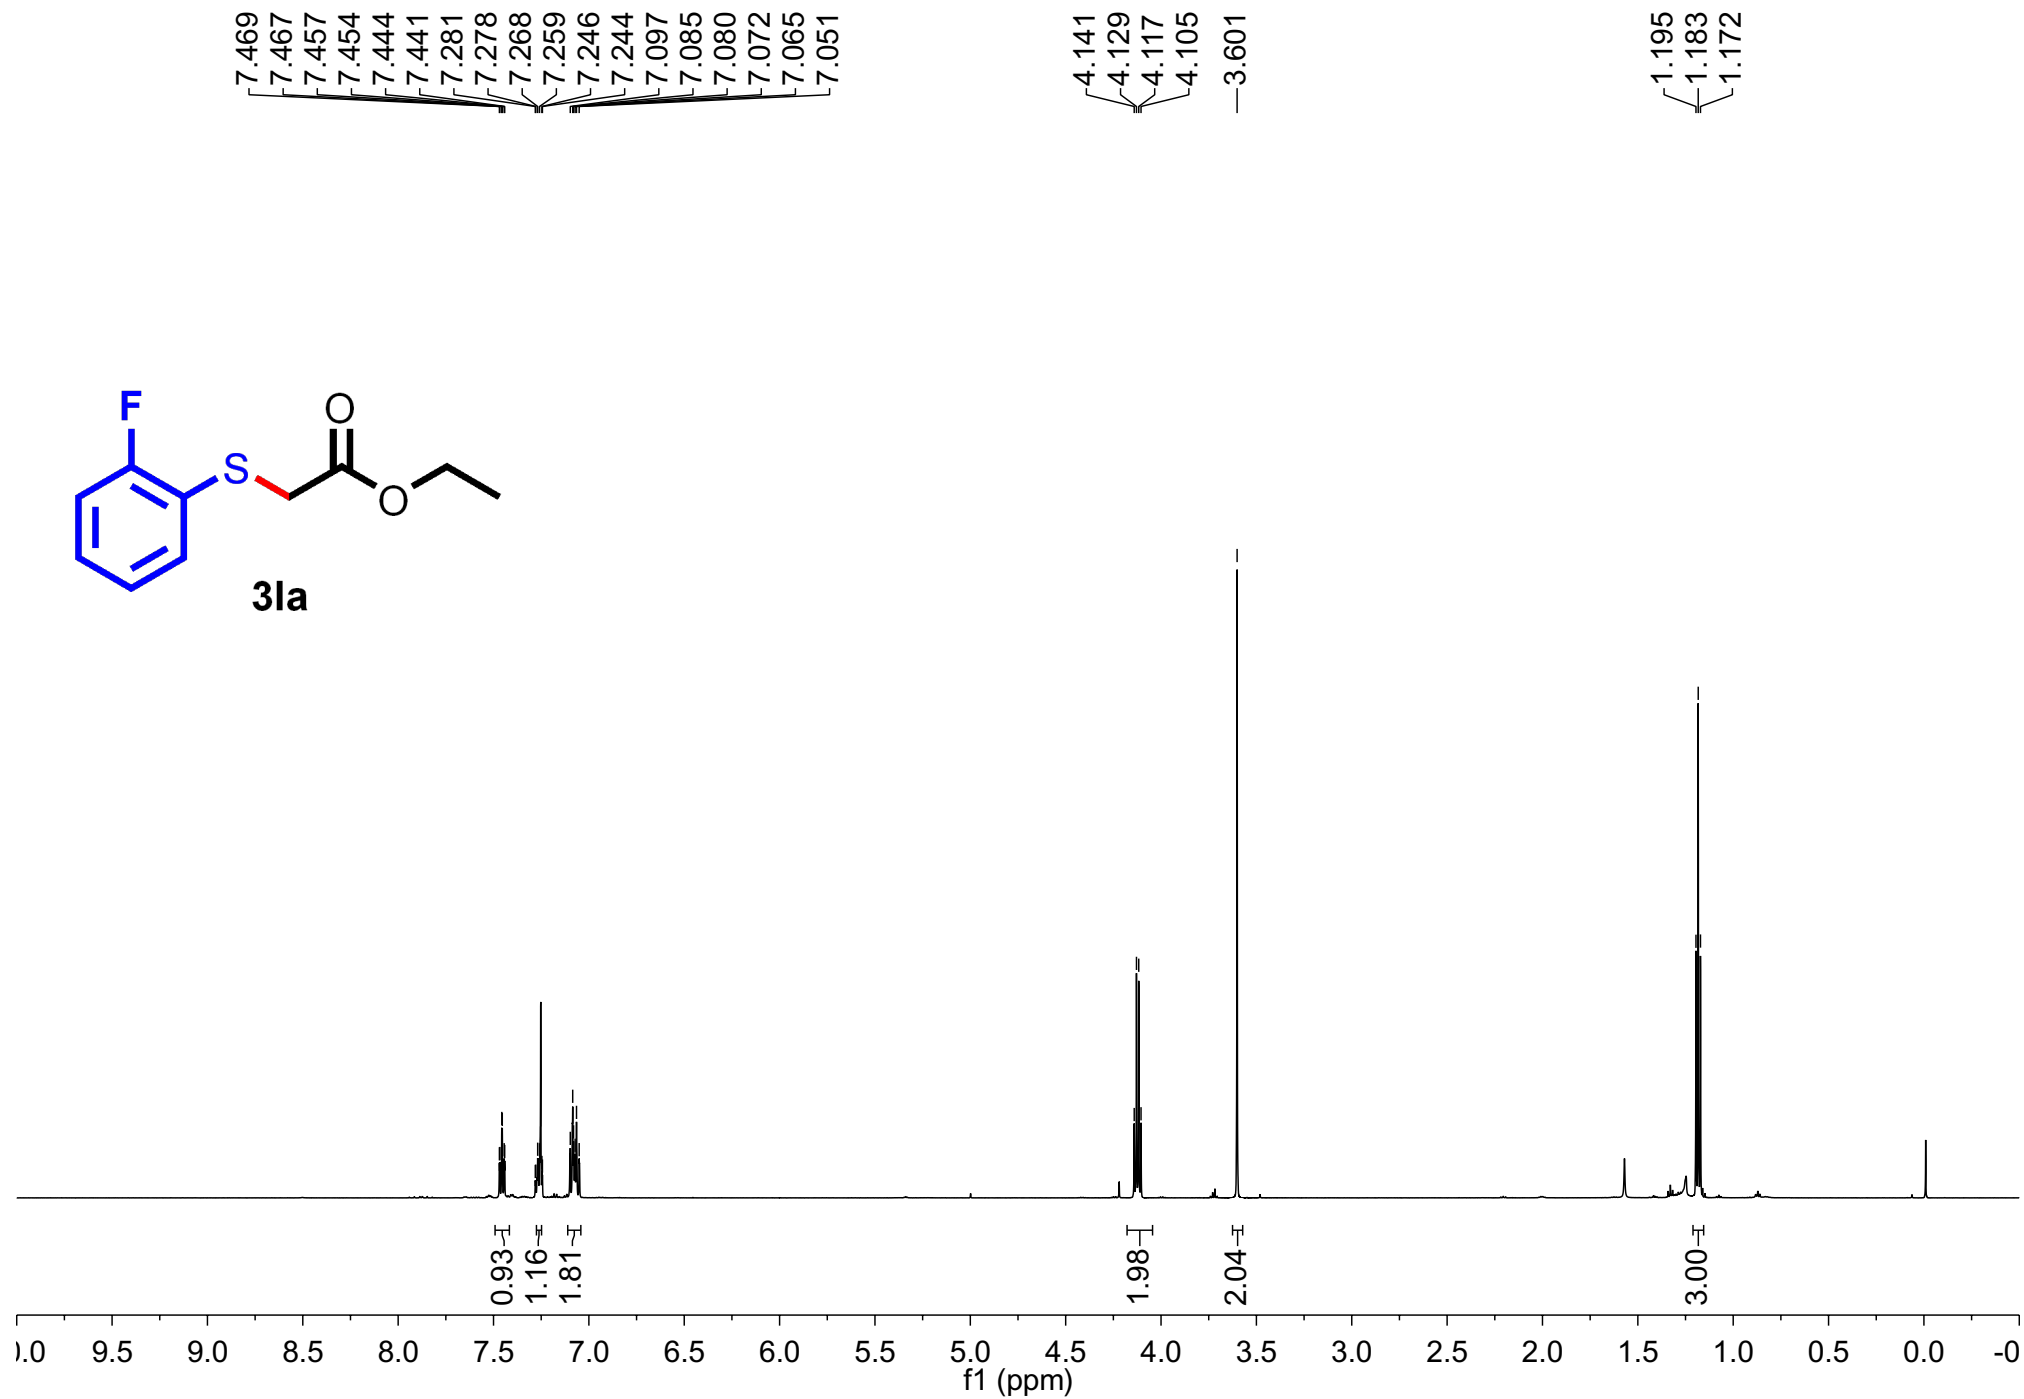

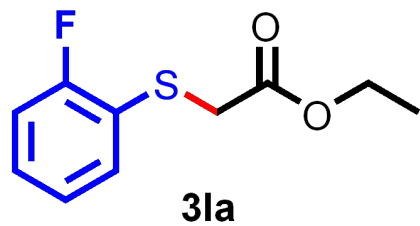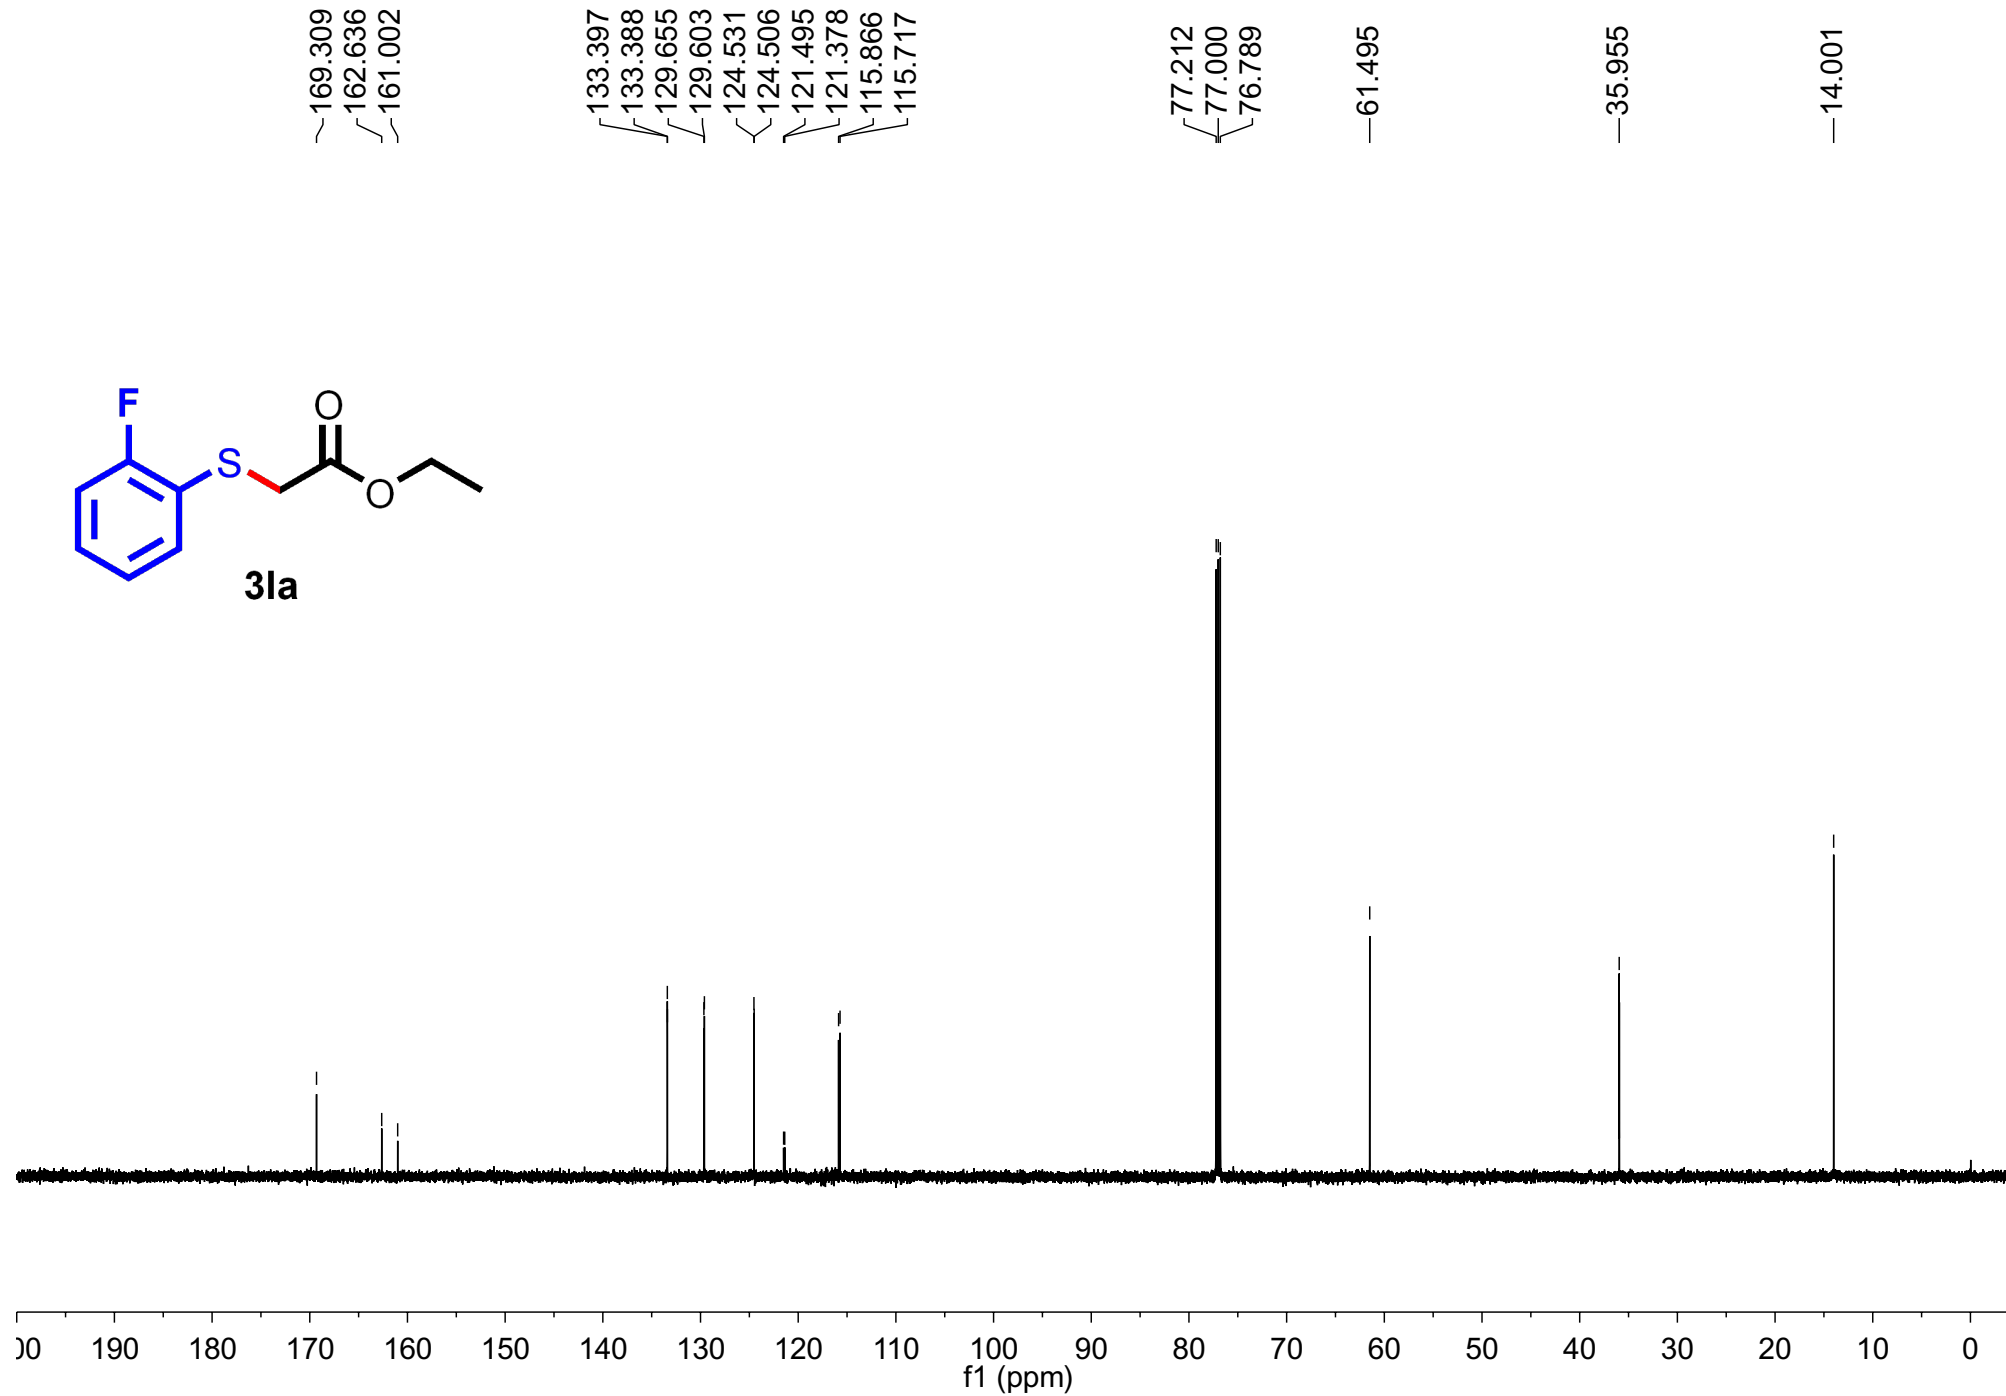

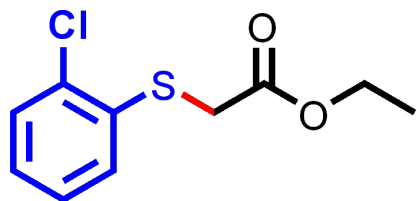

3ma

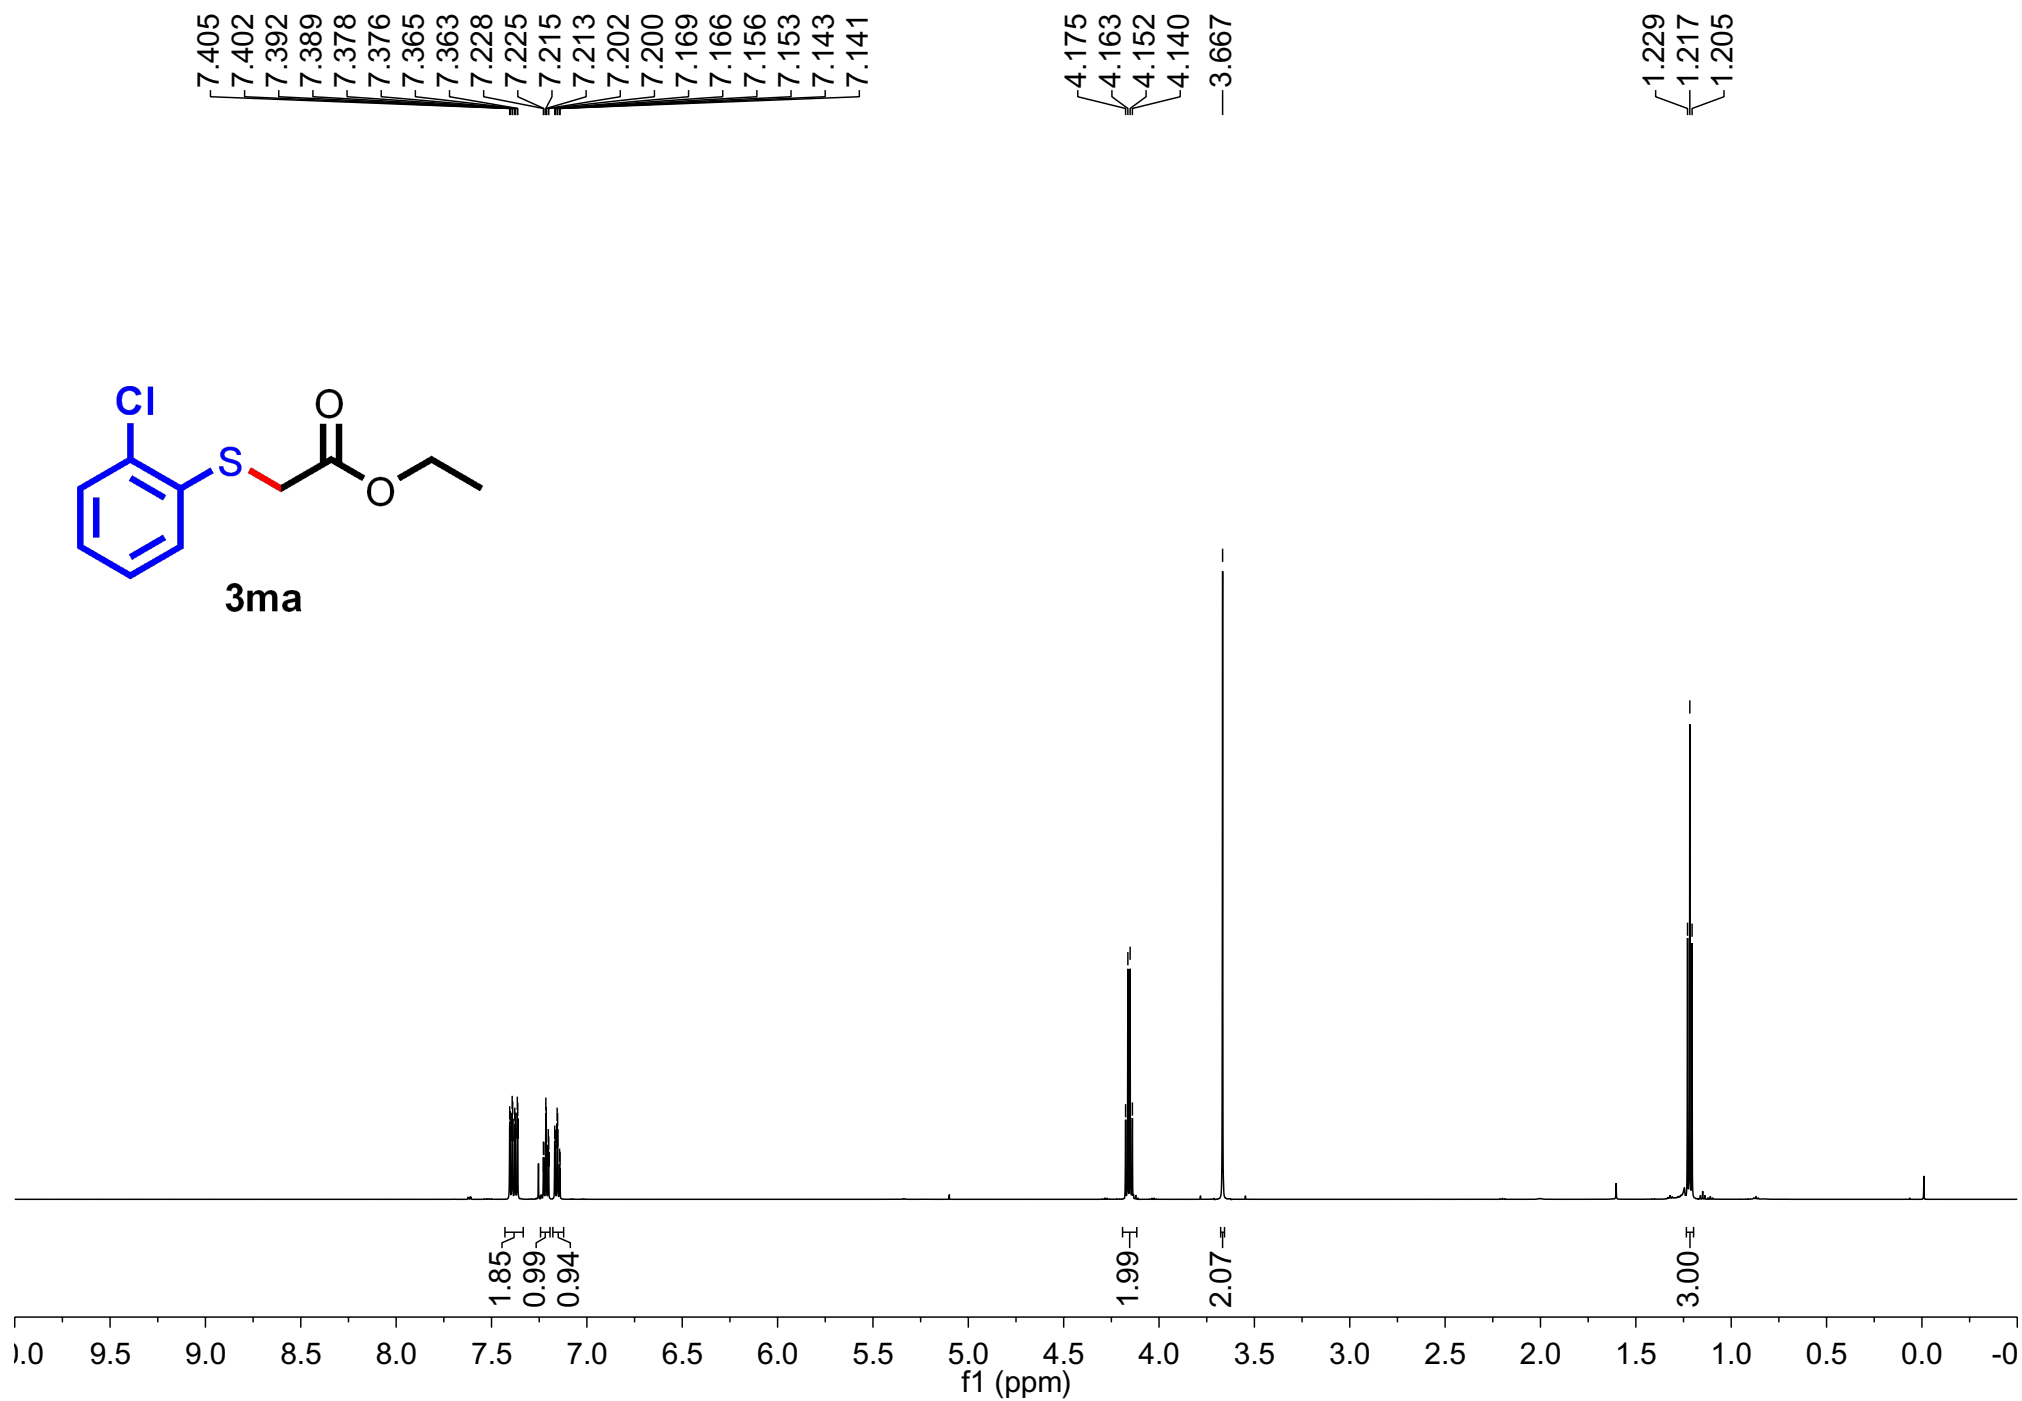

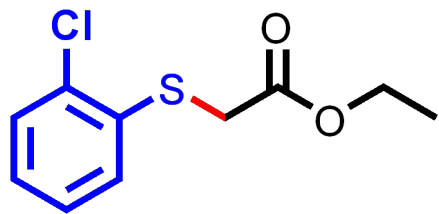

3ma

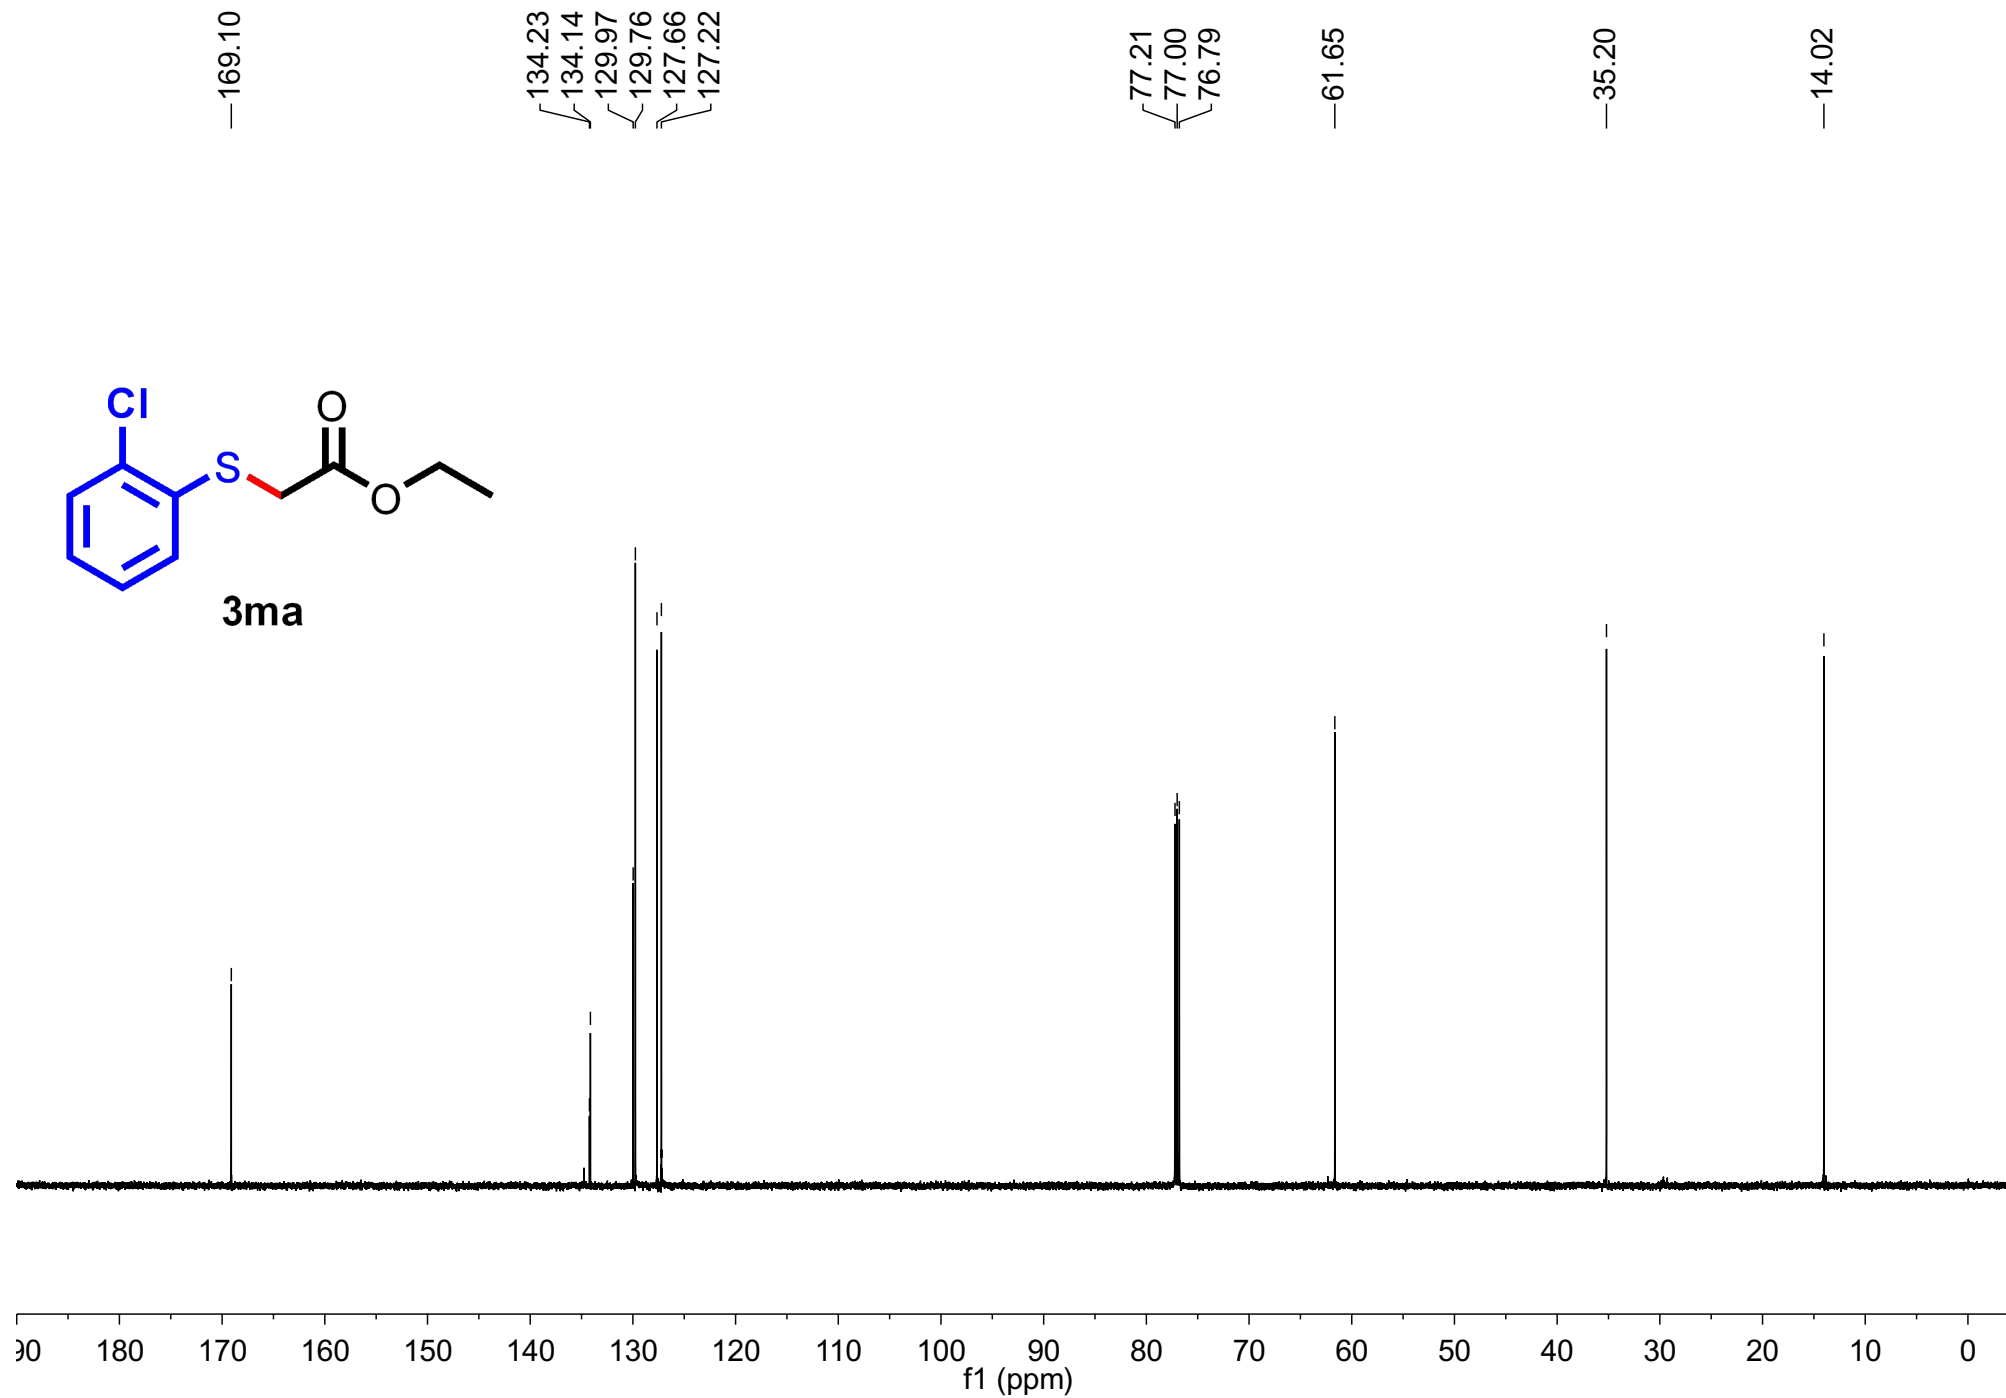

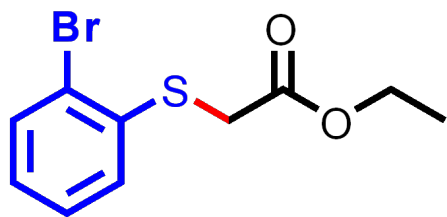

3na

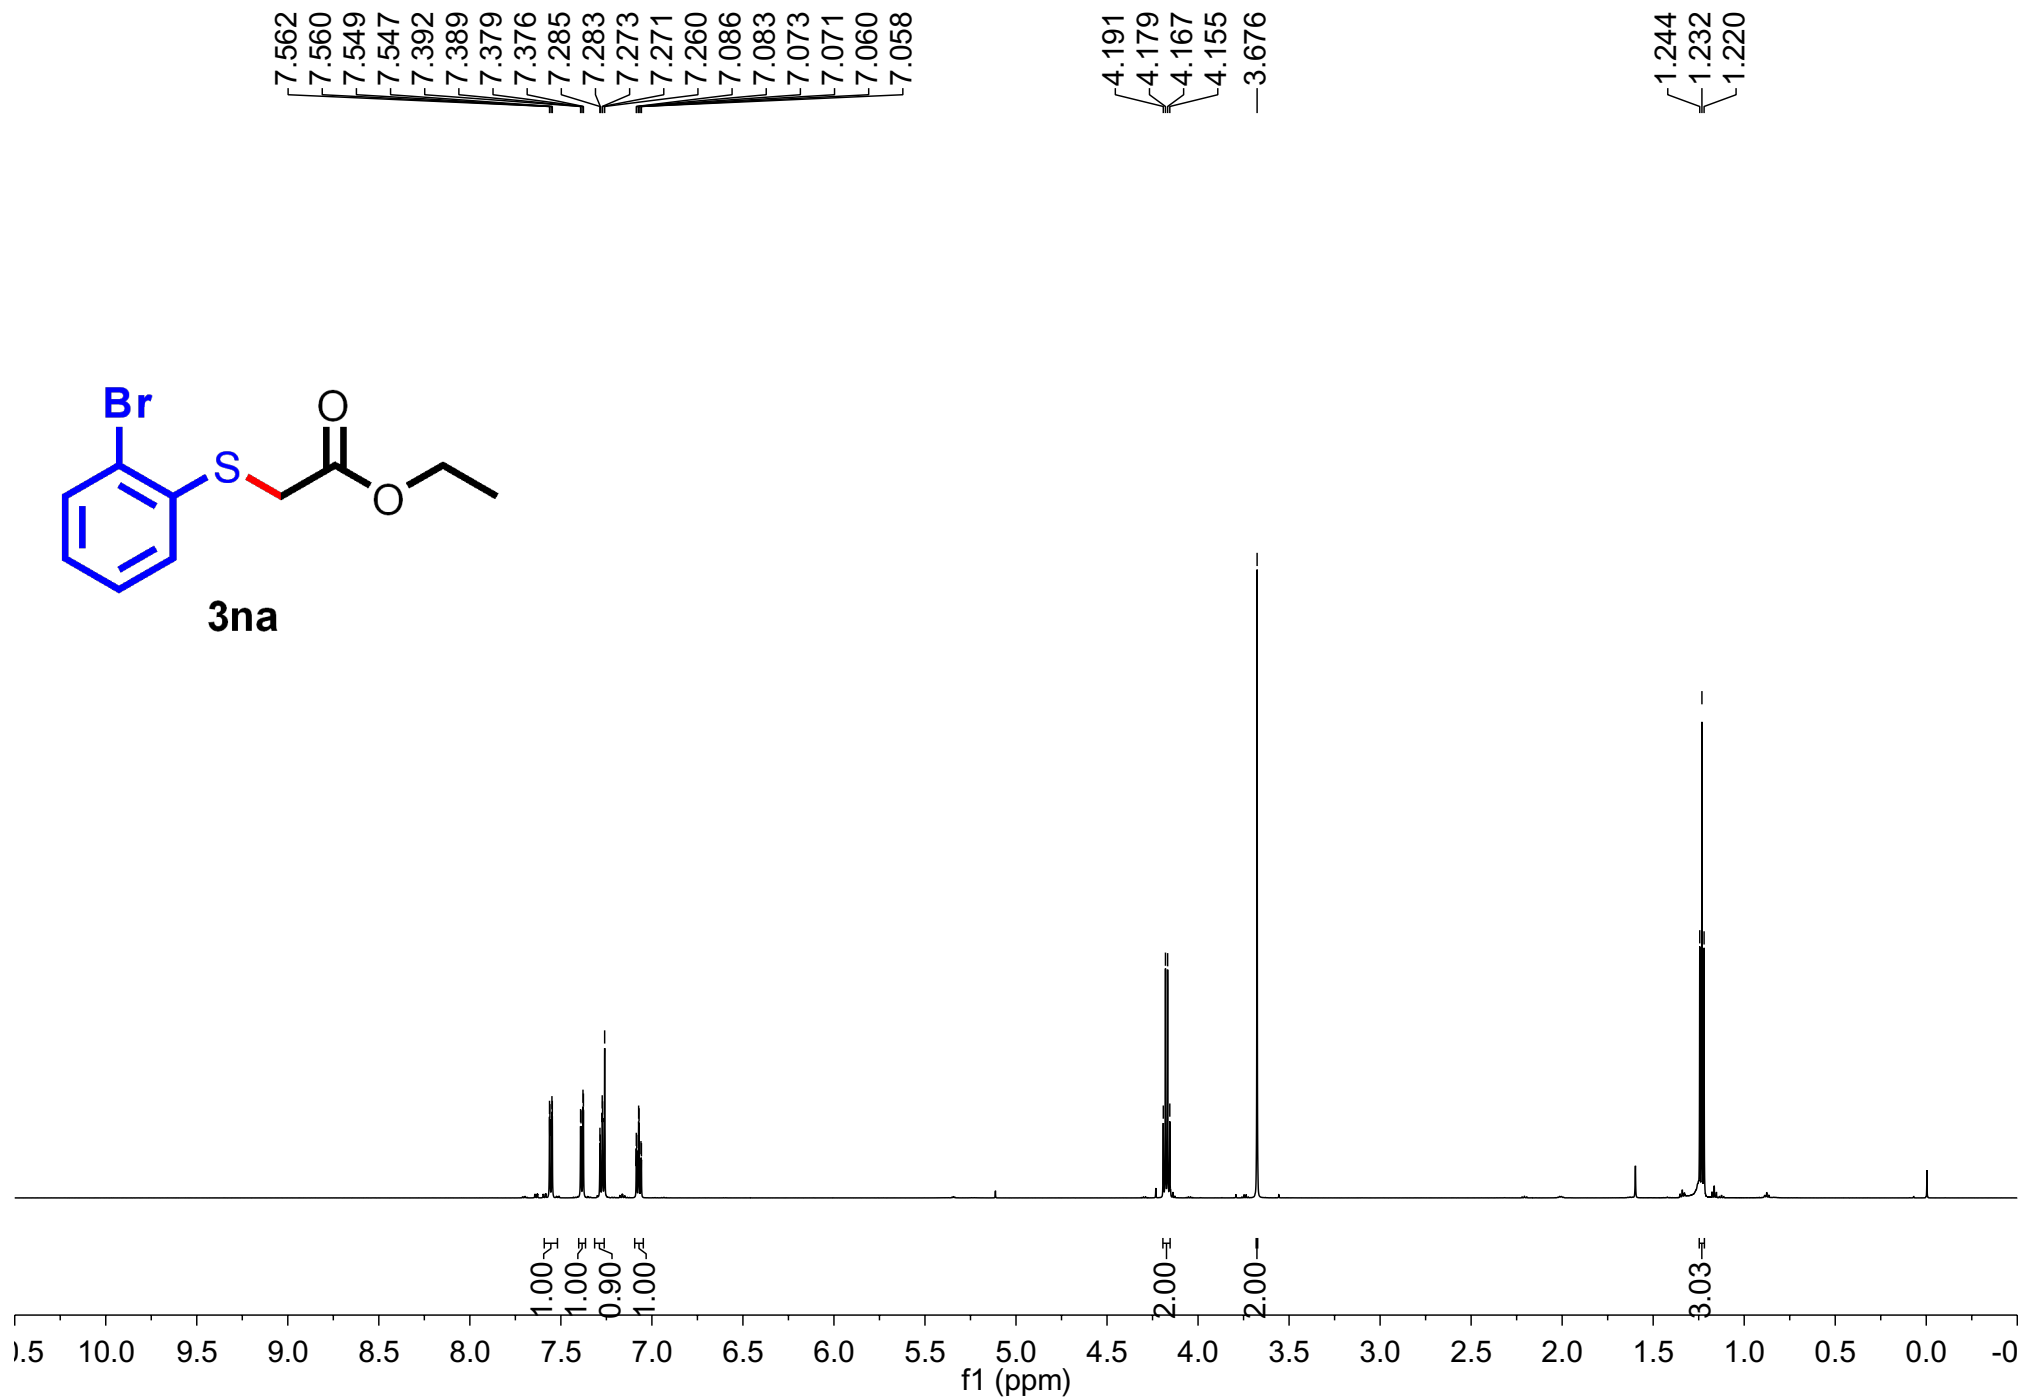



CARBON\_01

—169.06

—136.28

—133.06

—129.49

—127.88

—127.65

—124.15

—77.21

—77.00

—76.79

—61.69

—35.60

—14.05

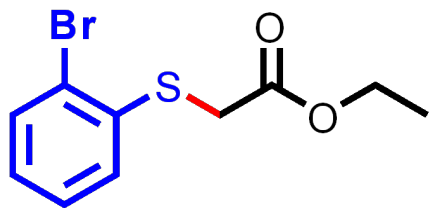

3na

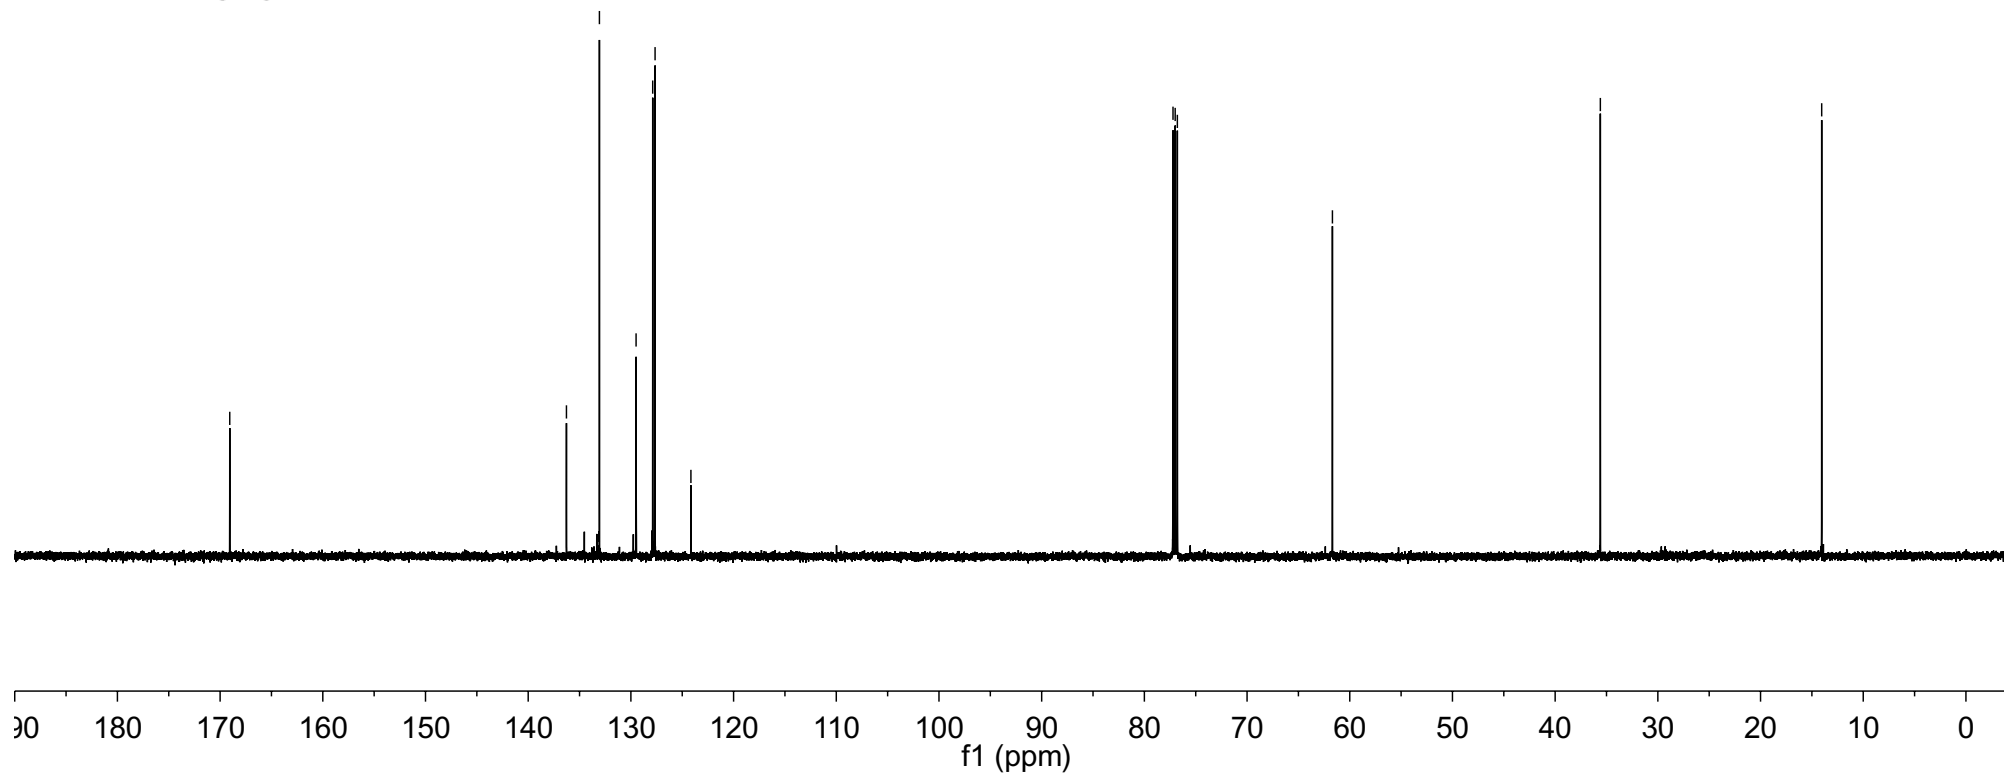

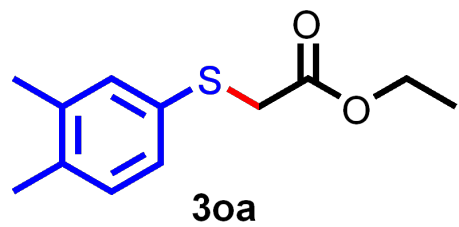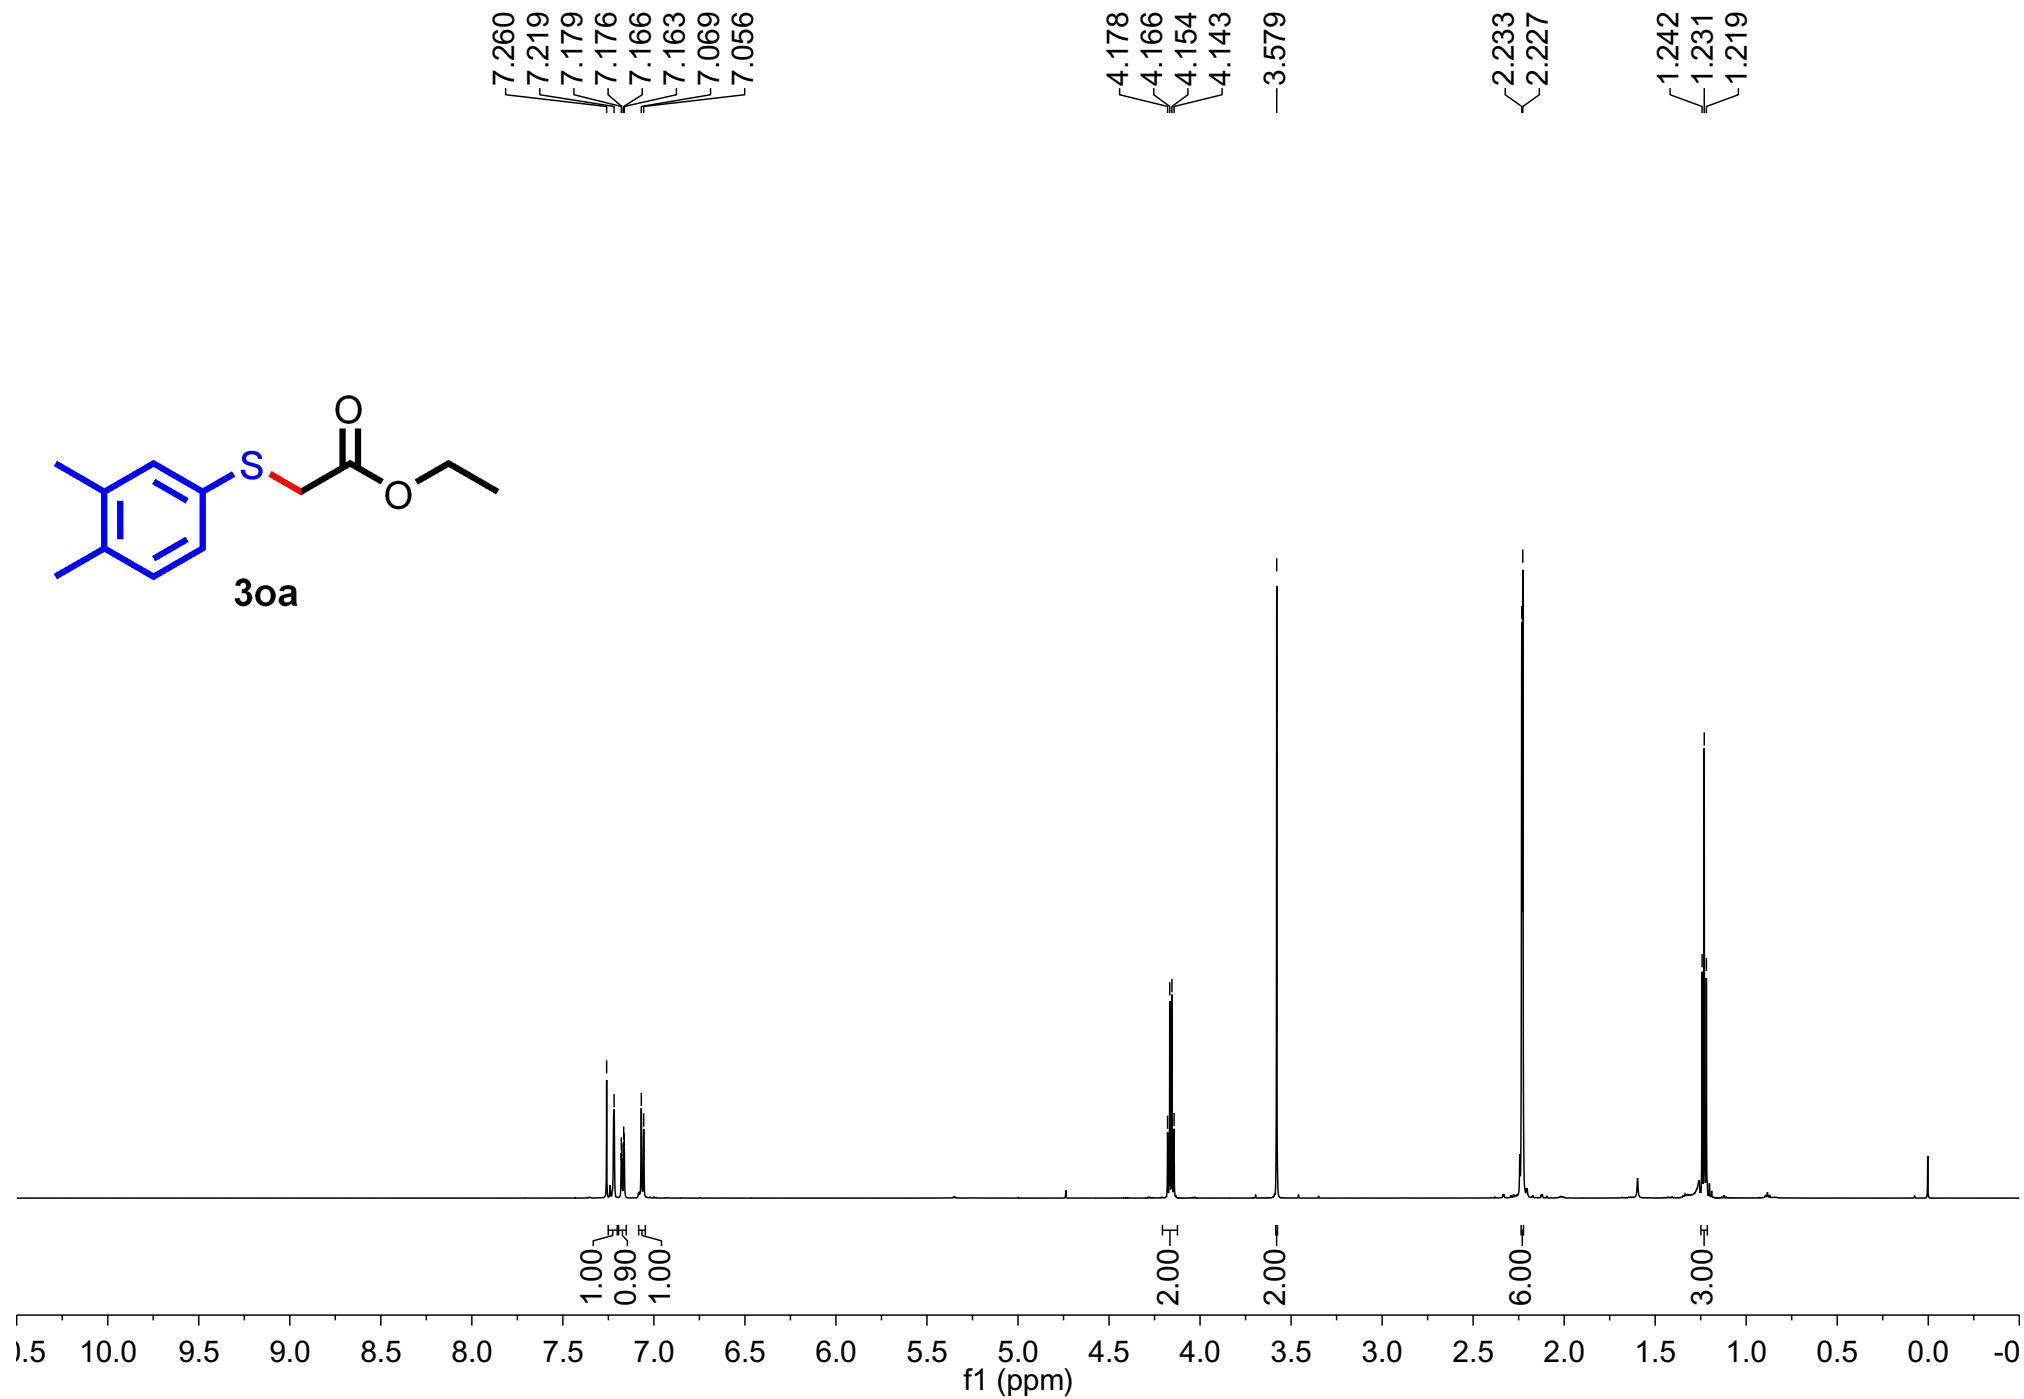

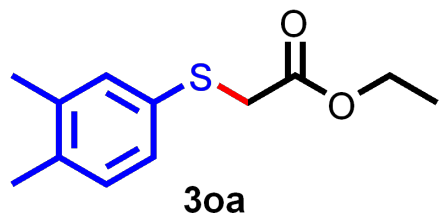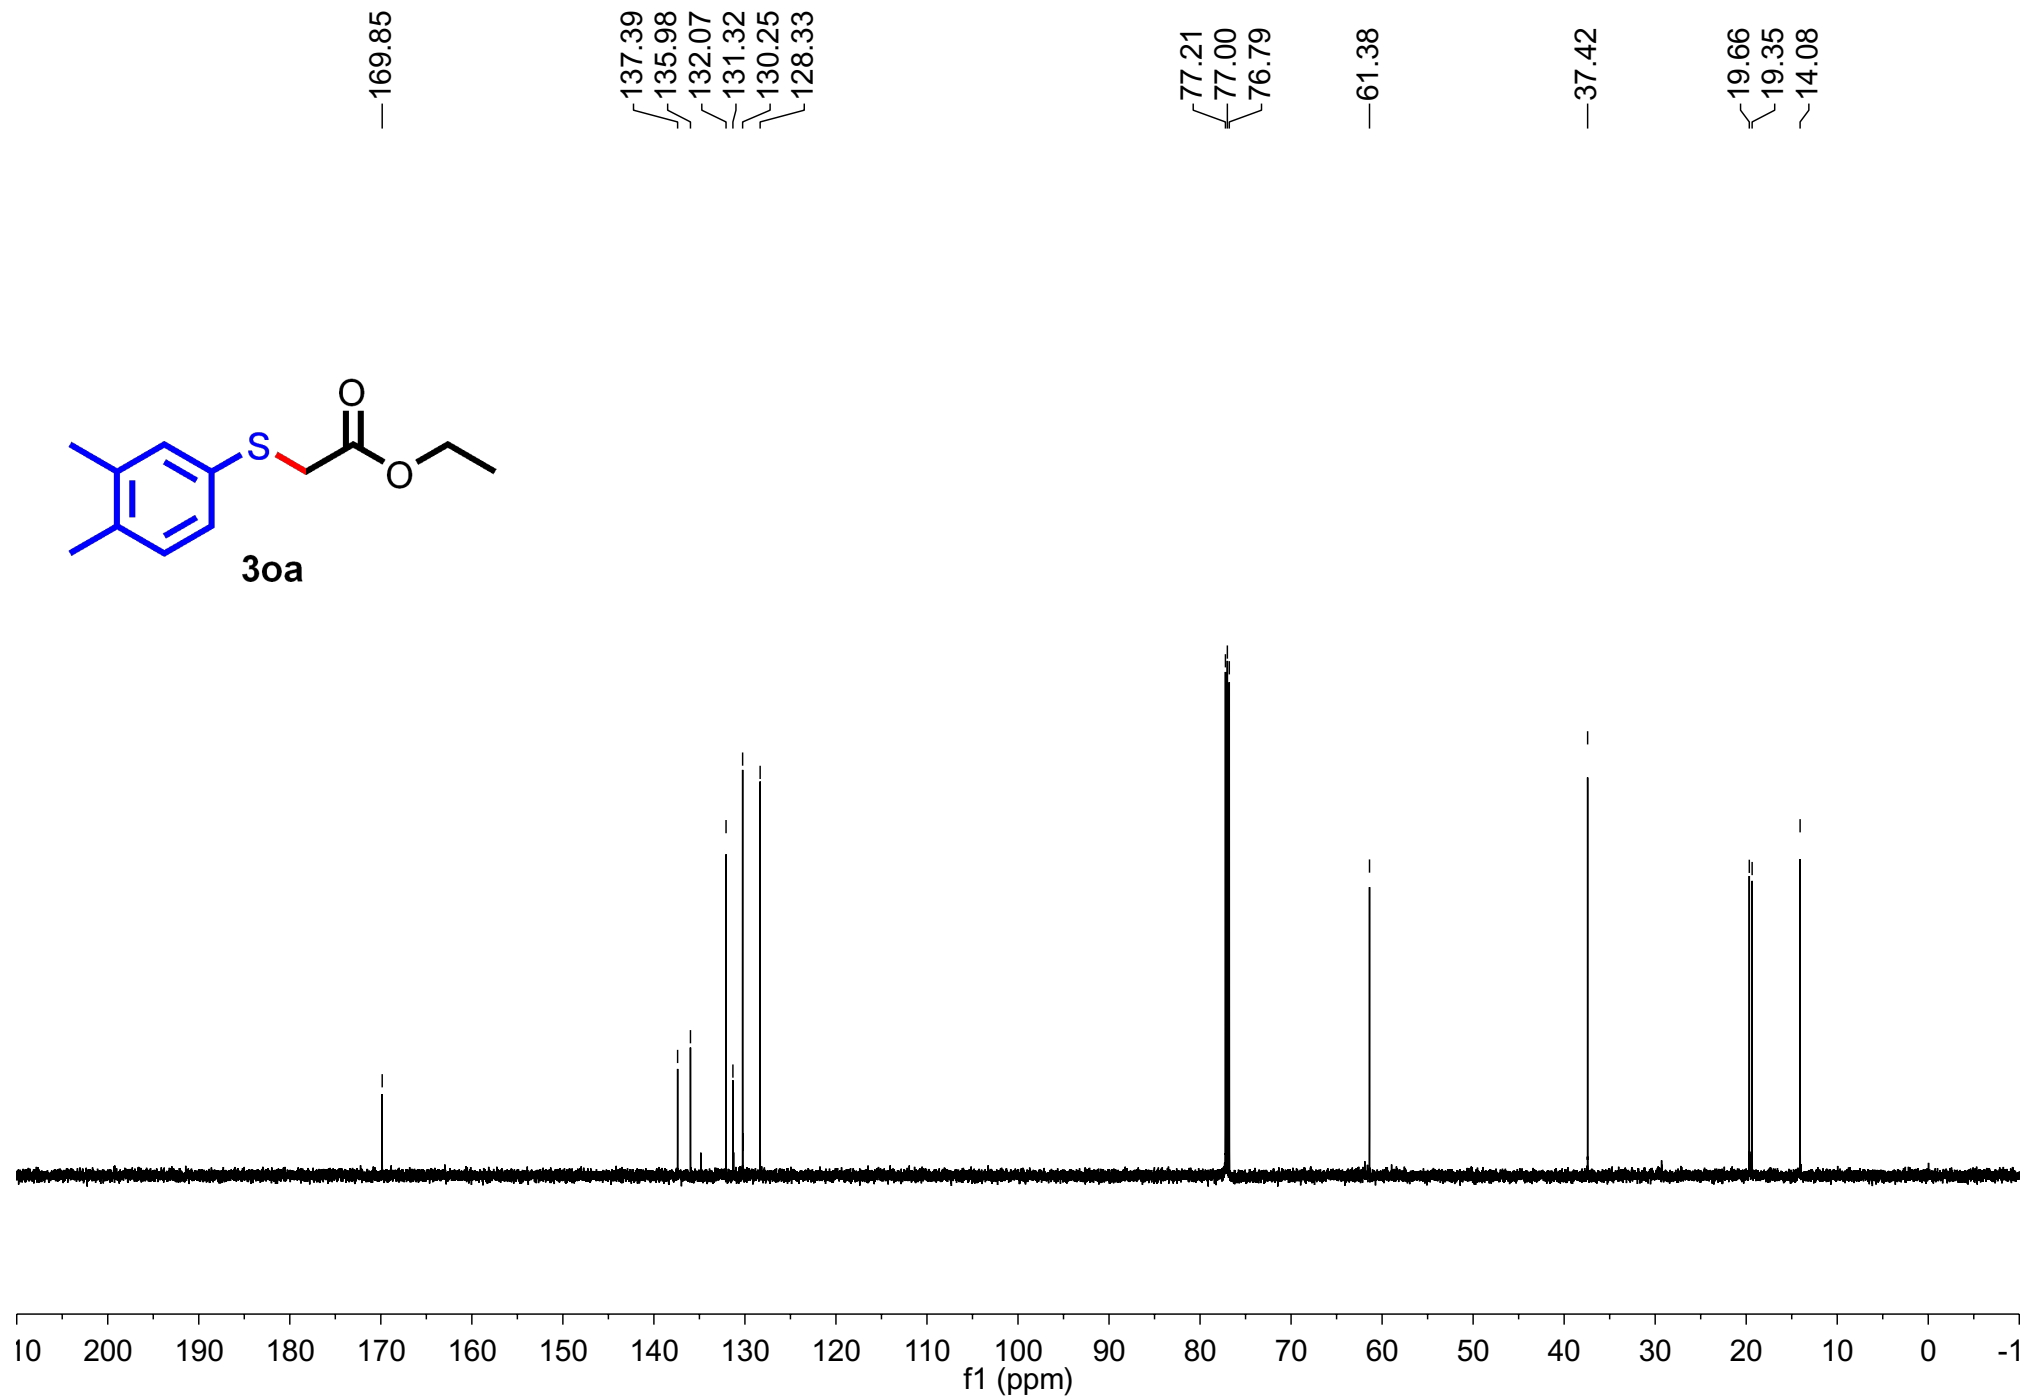

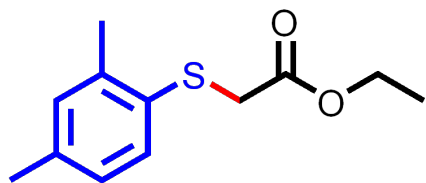

3pa

7.299  
7.285  
7.260  
7.021  
6.976  
6.963

4.160  
4.148  
4.136  
4.124  
3.545

2.406  
2.291

1.232  
1.220  
1.208

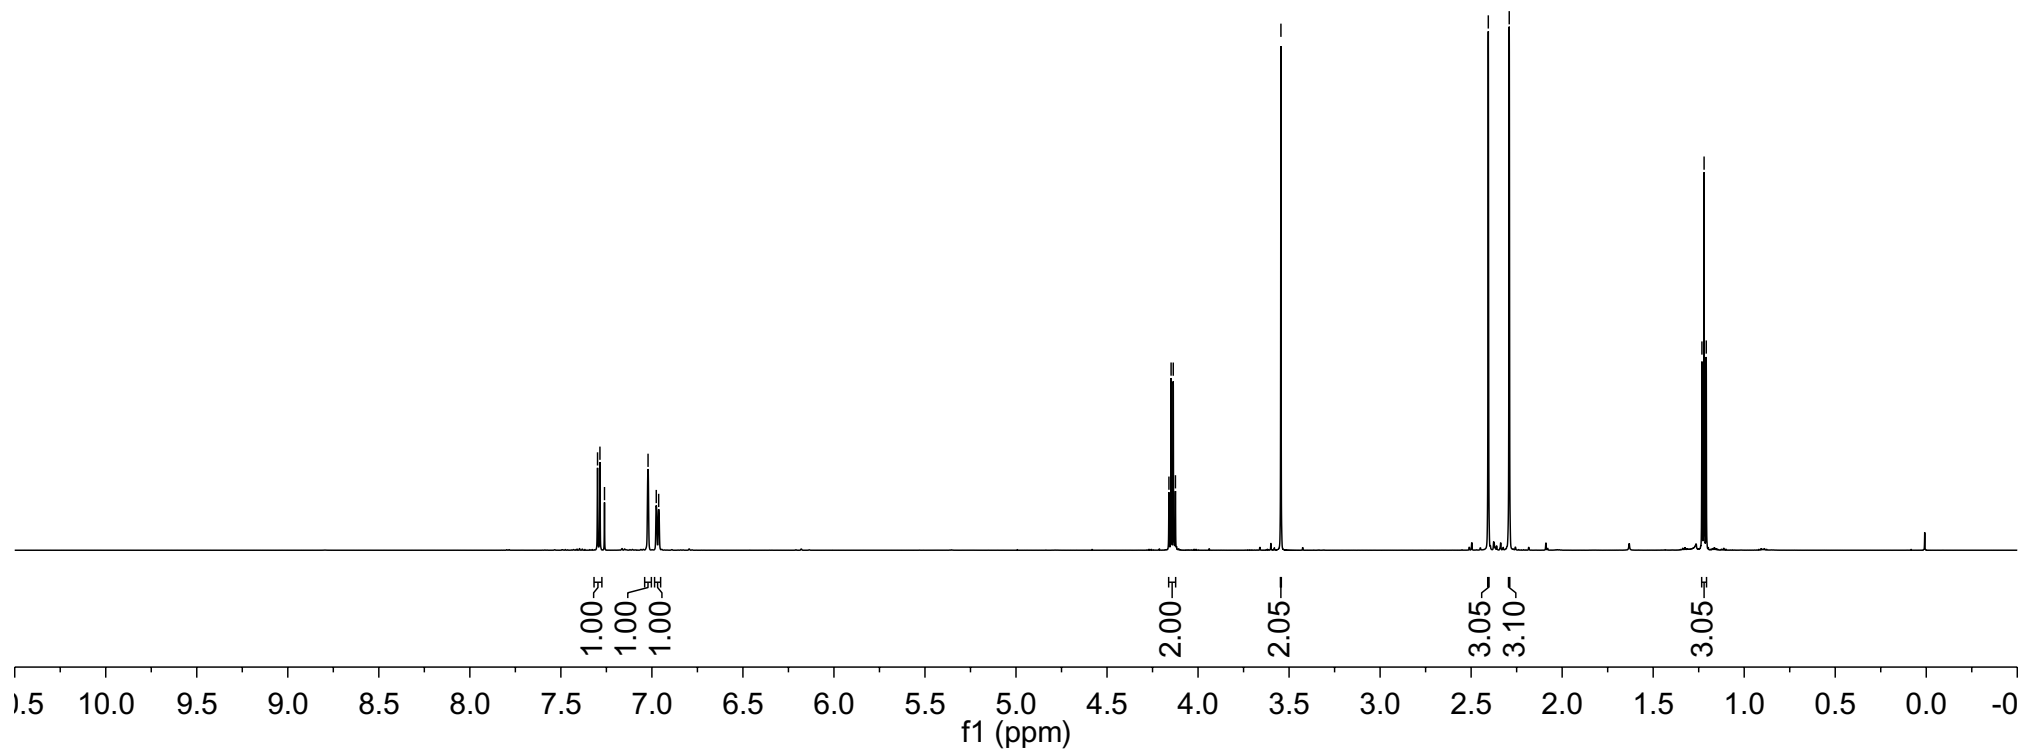

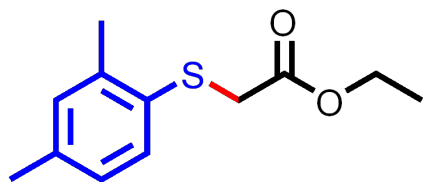

3pa

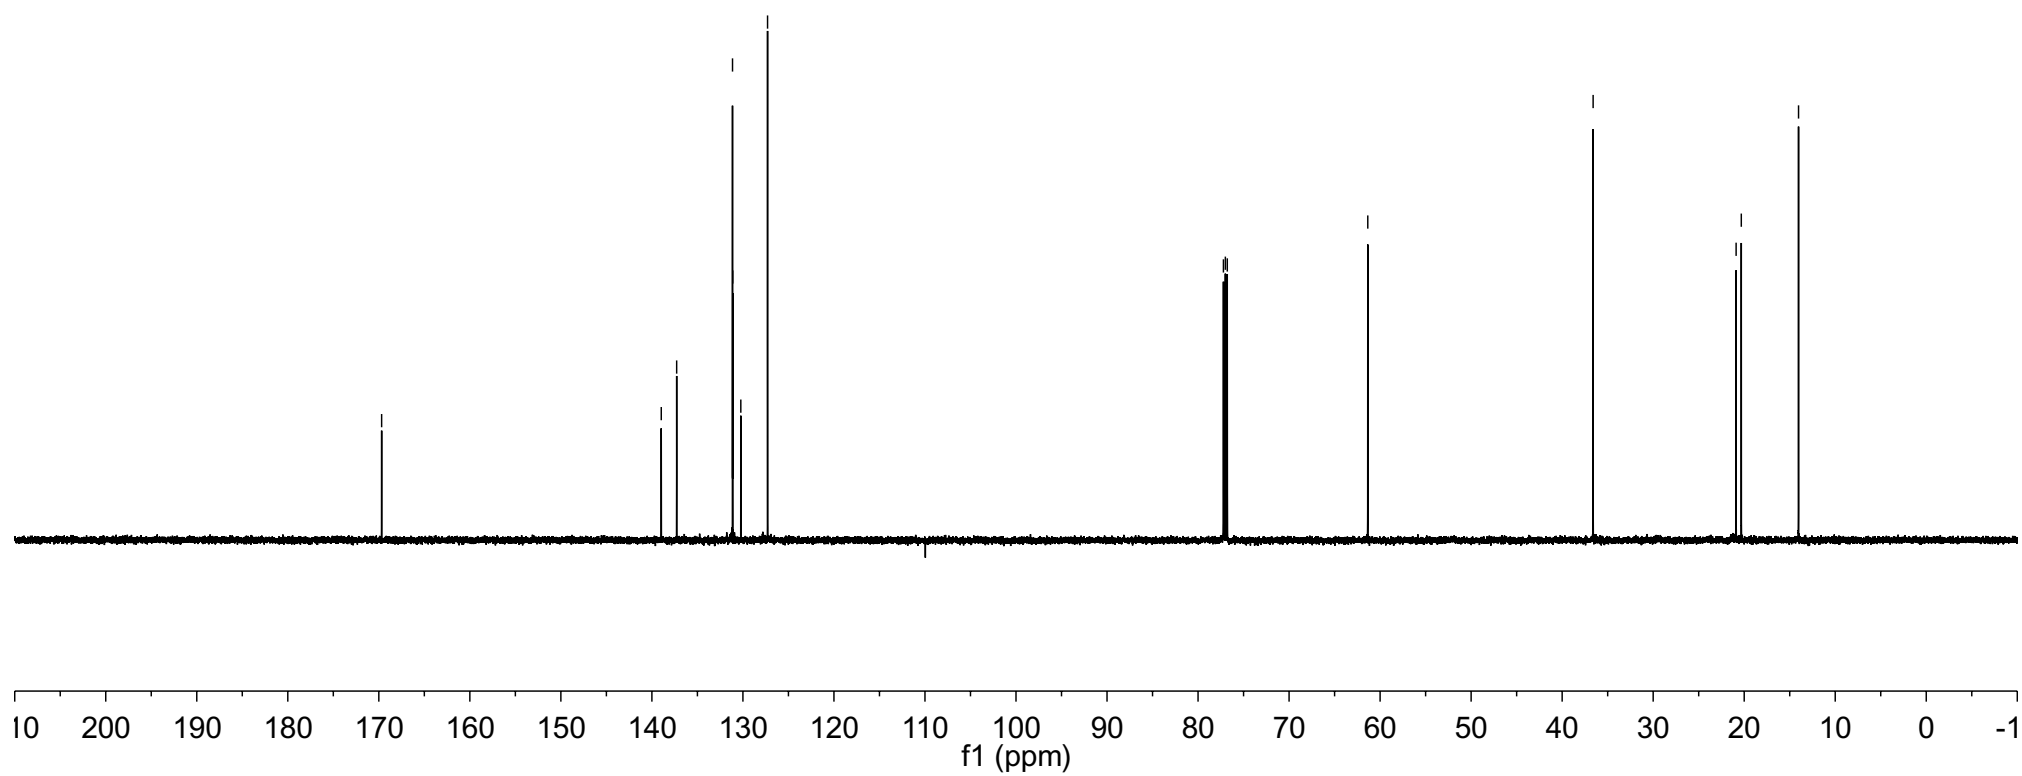

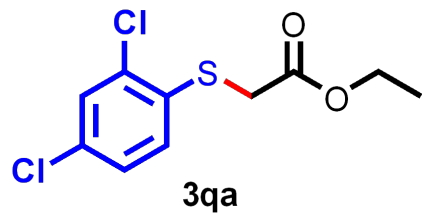

7.404  
7.400  
7.363  
7.349  
7.260  
7.215  
7.211  
7.201  
7.197

4.183  
4.171  
4.159  
4.148  
—3.644

1.244  
1.232  
1.220

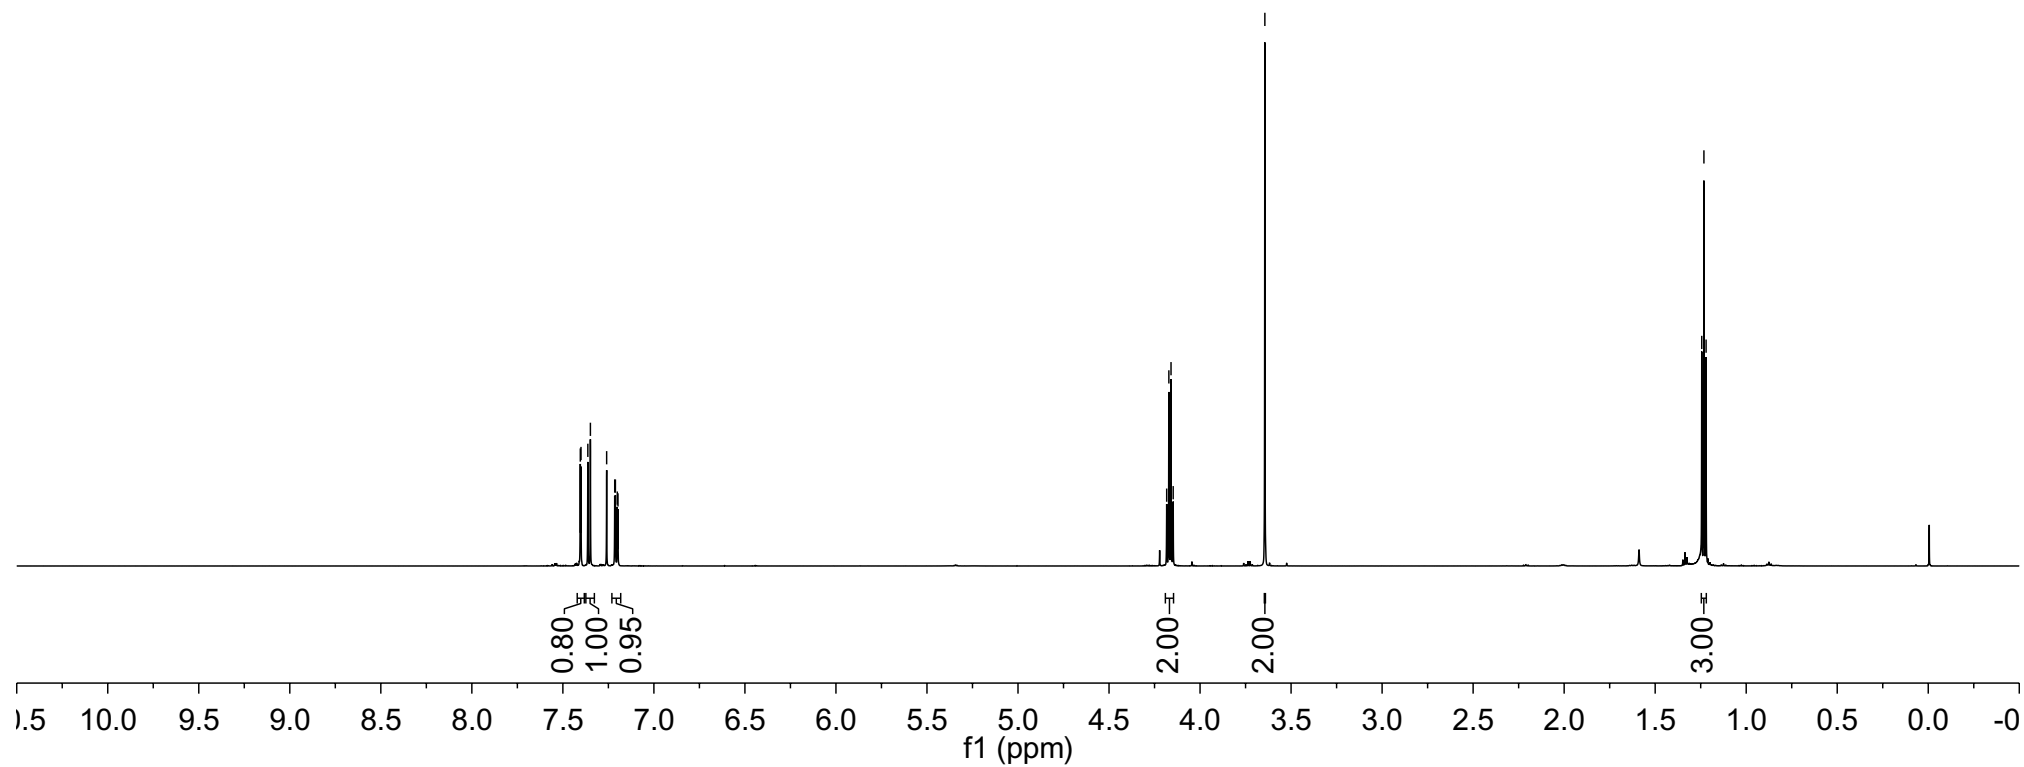

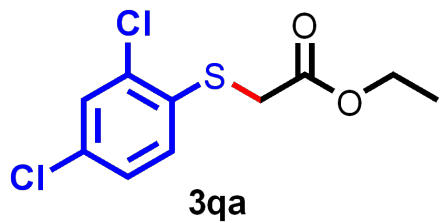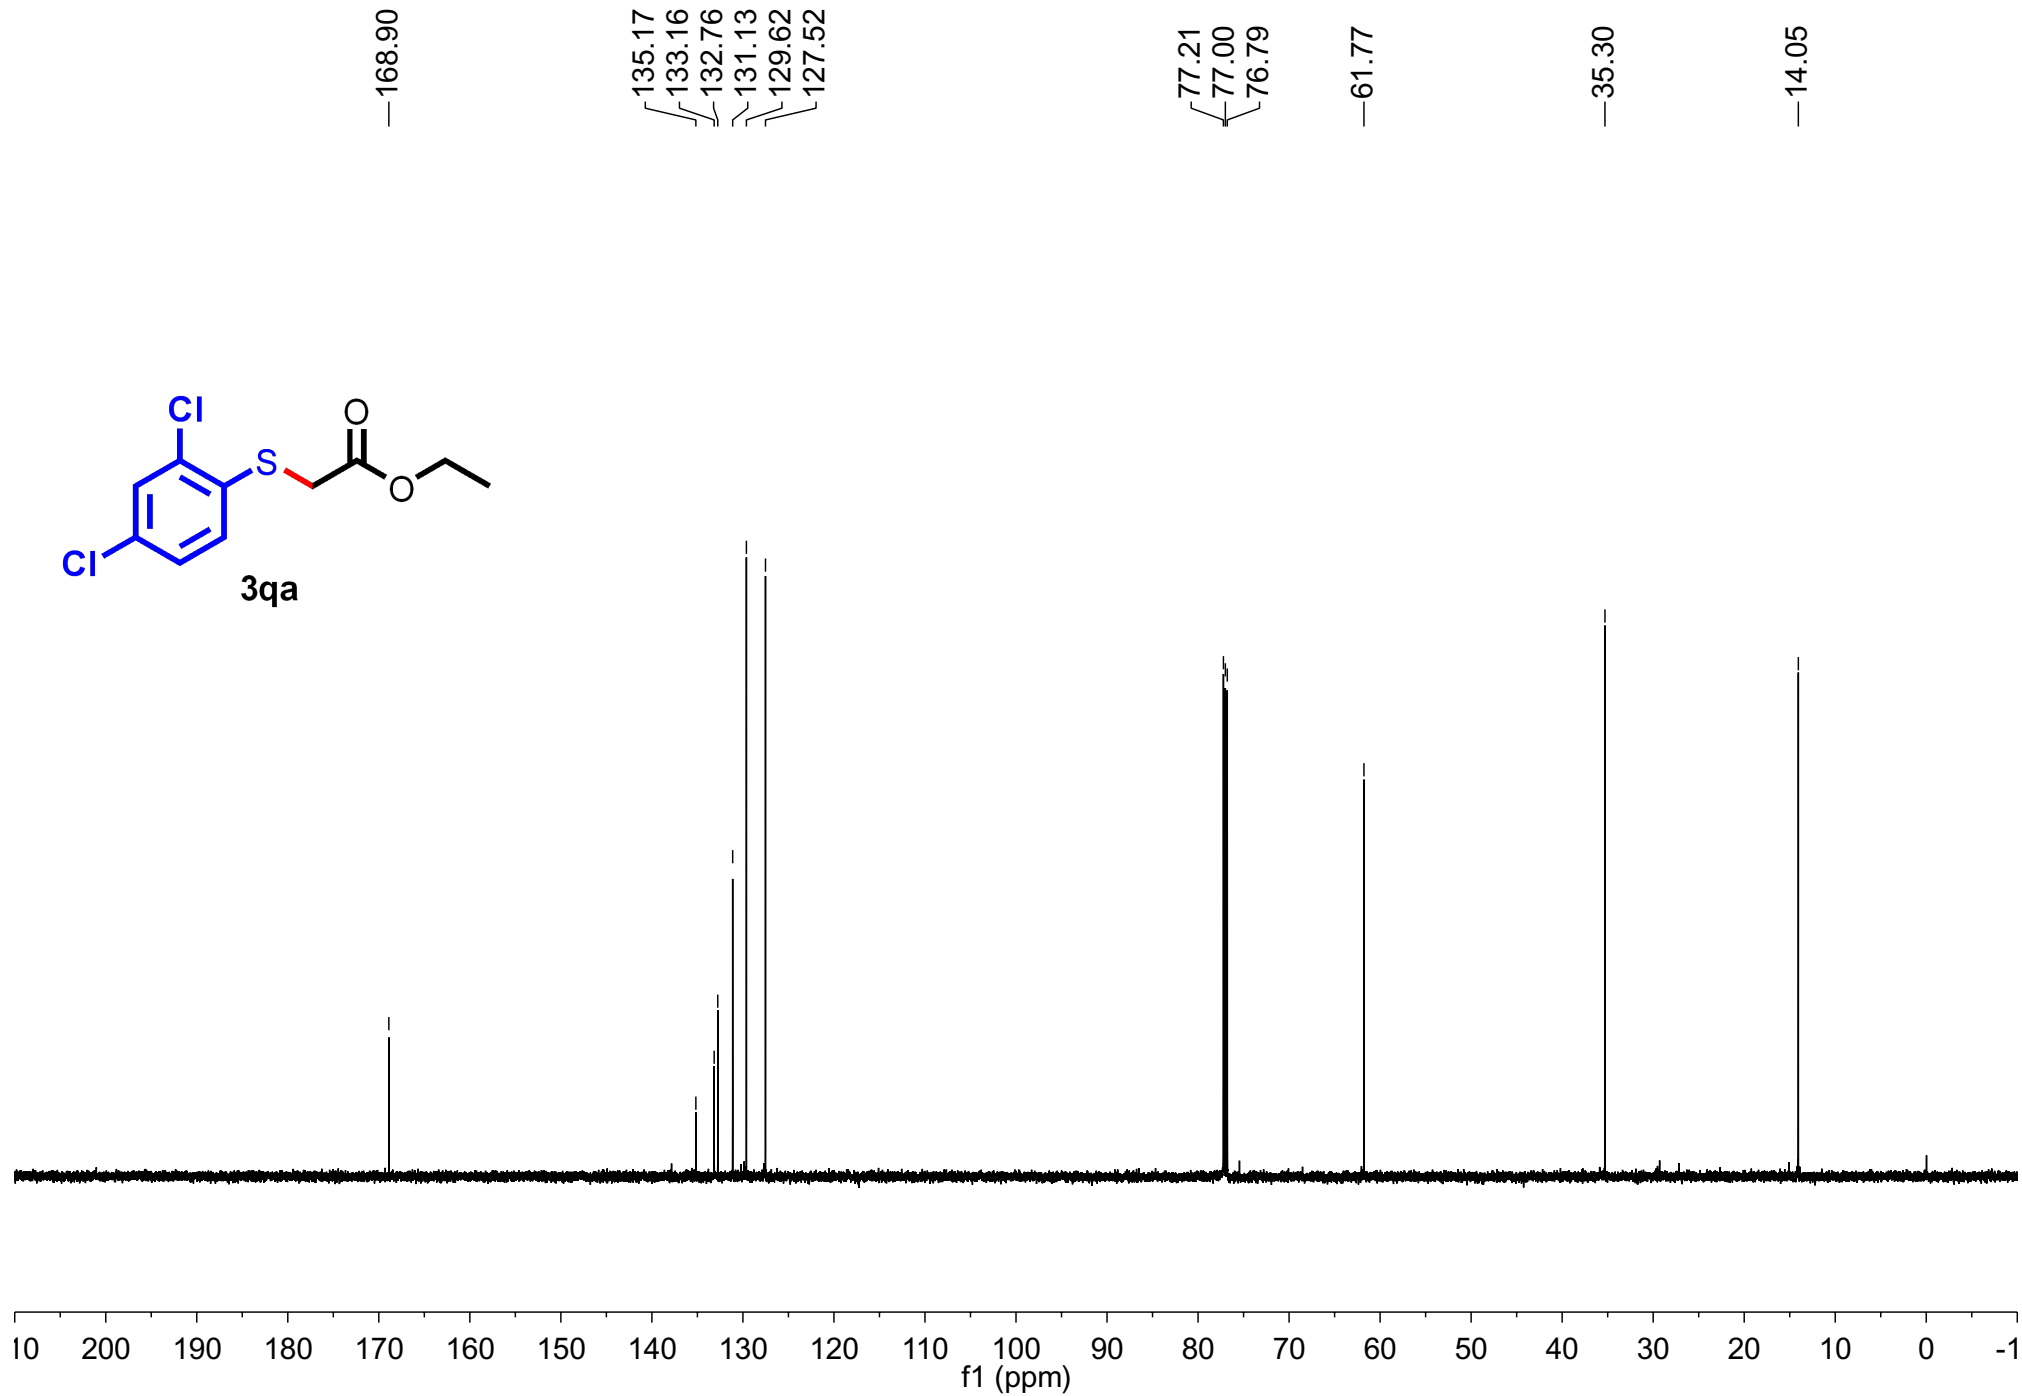

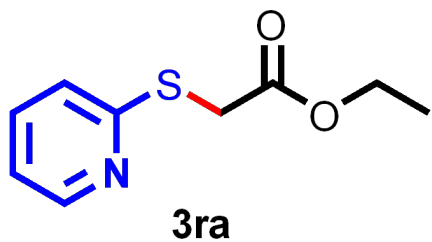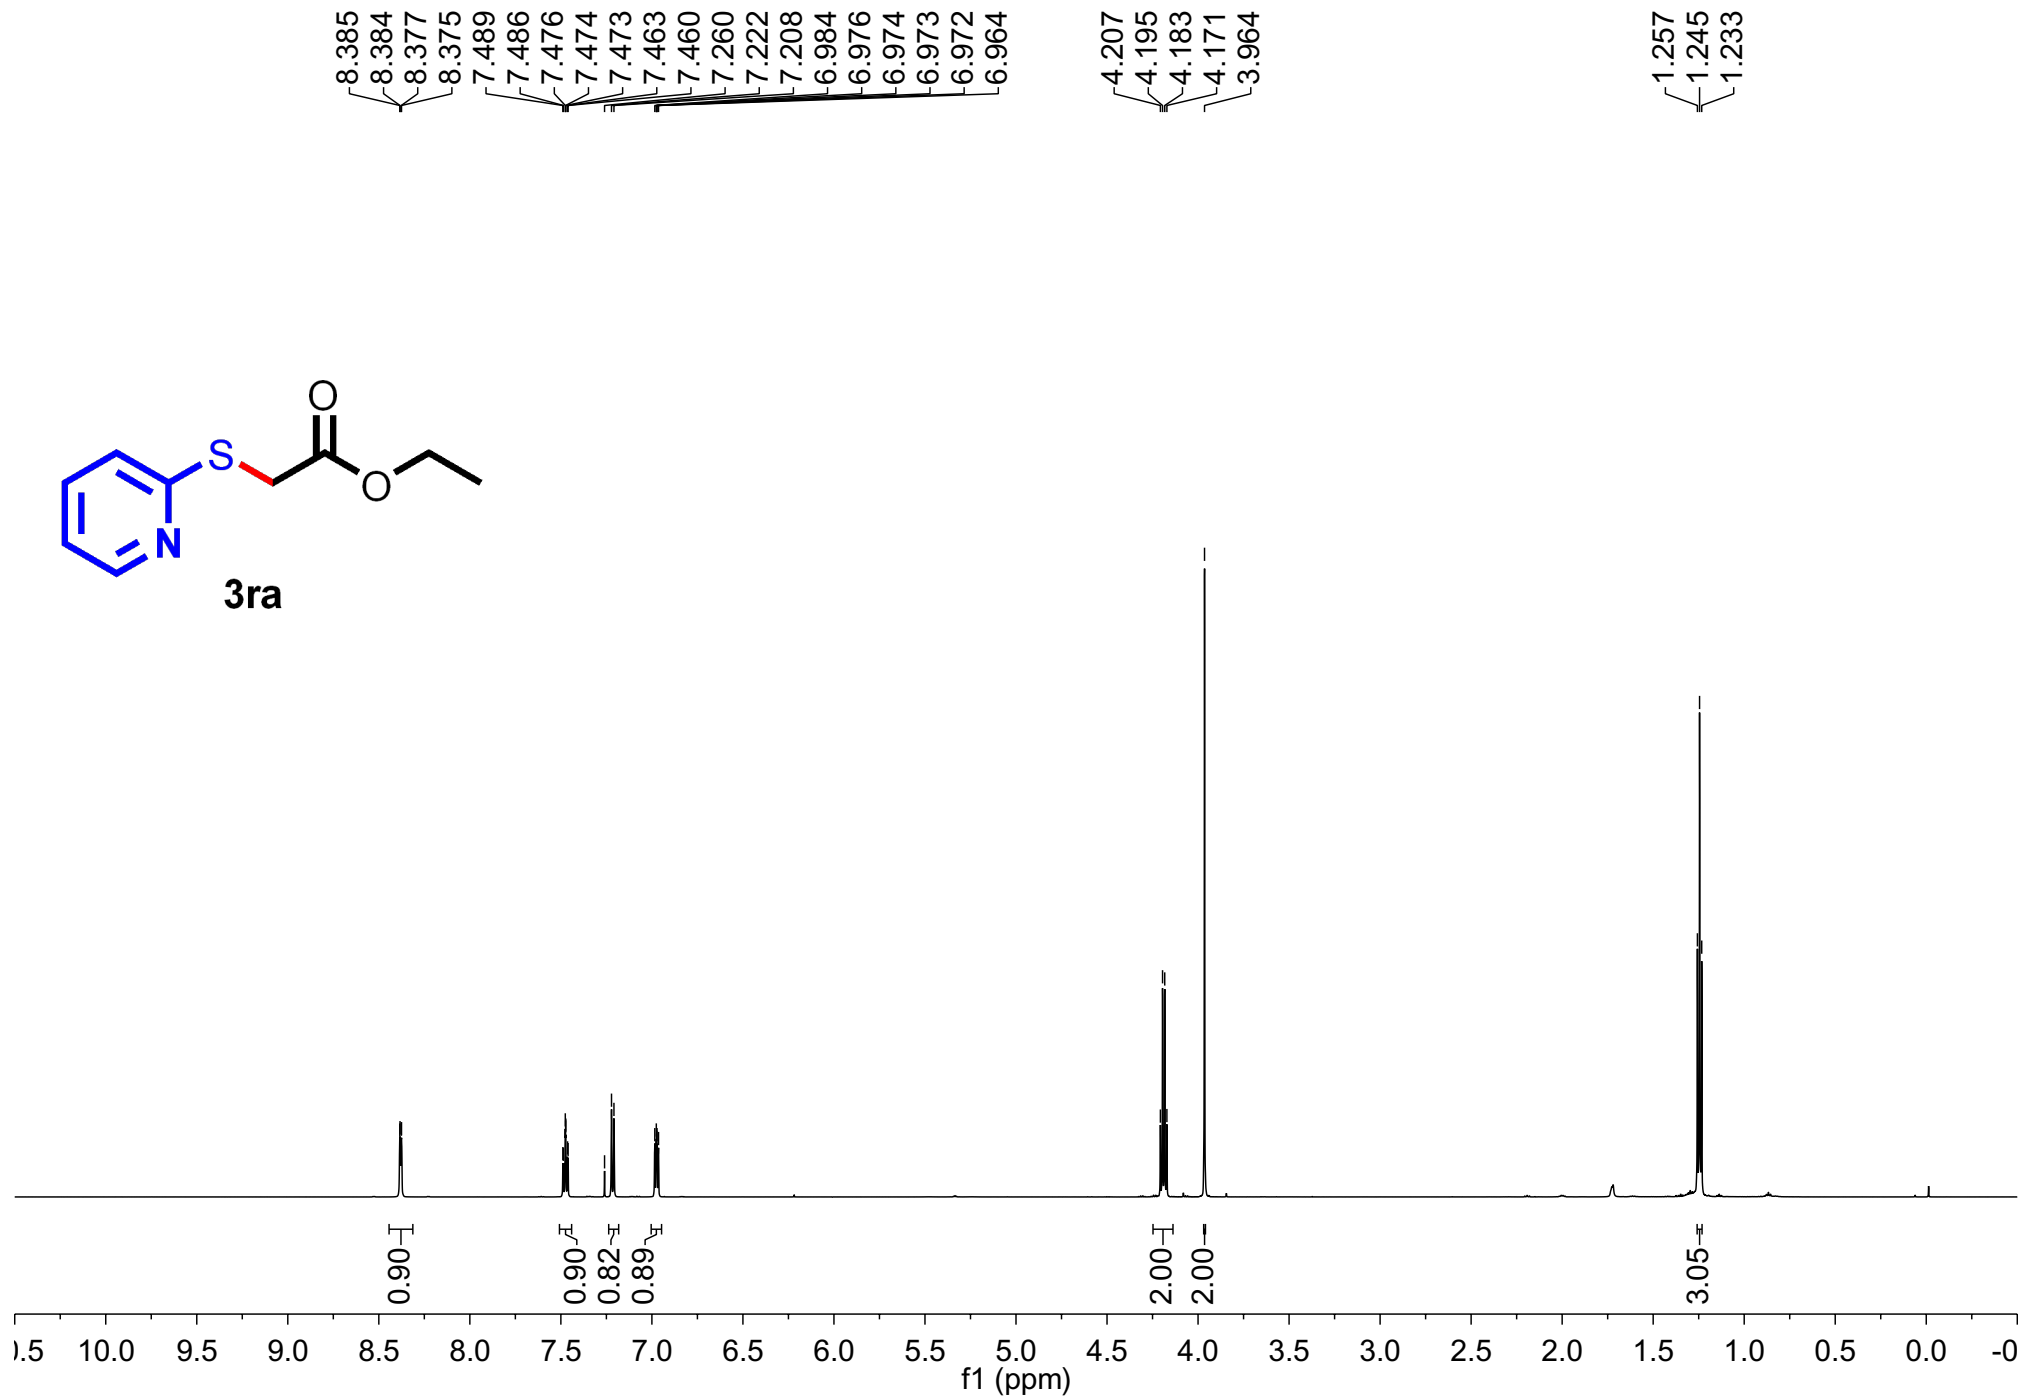



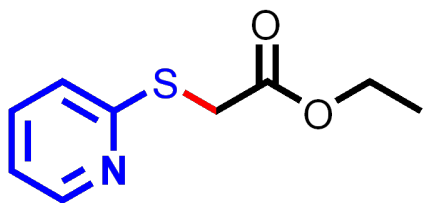

3ra

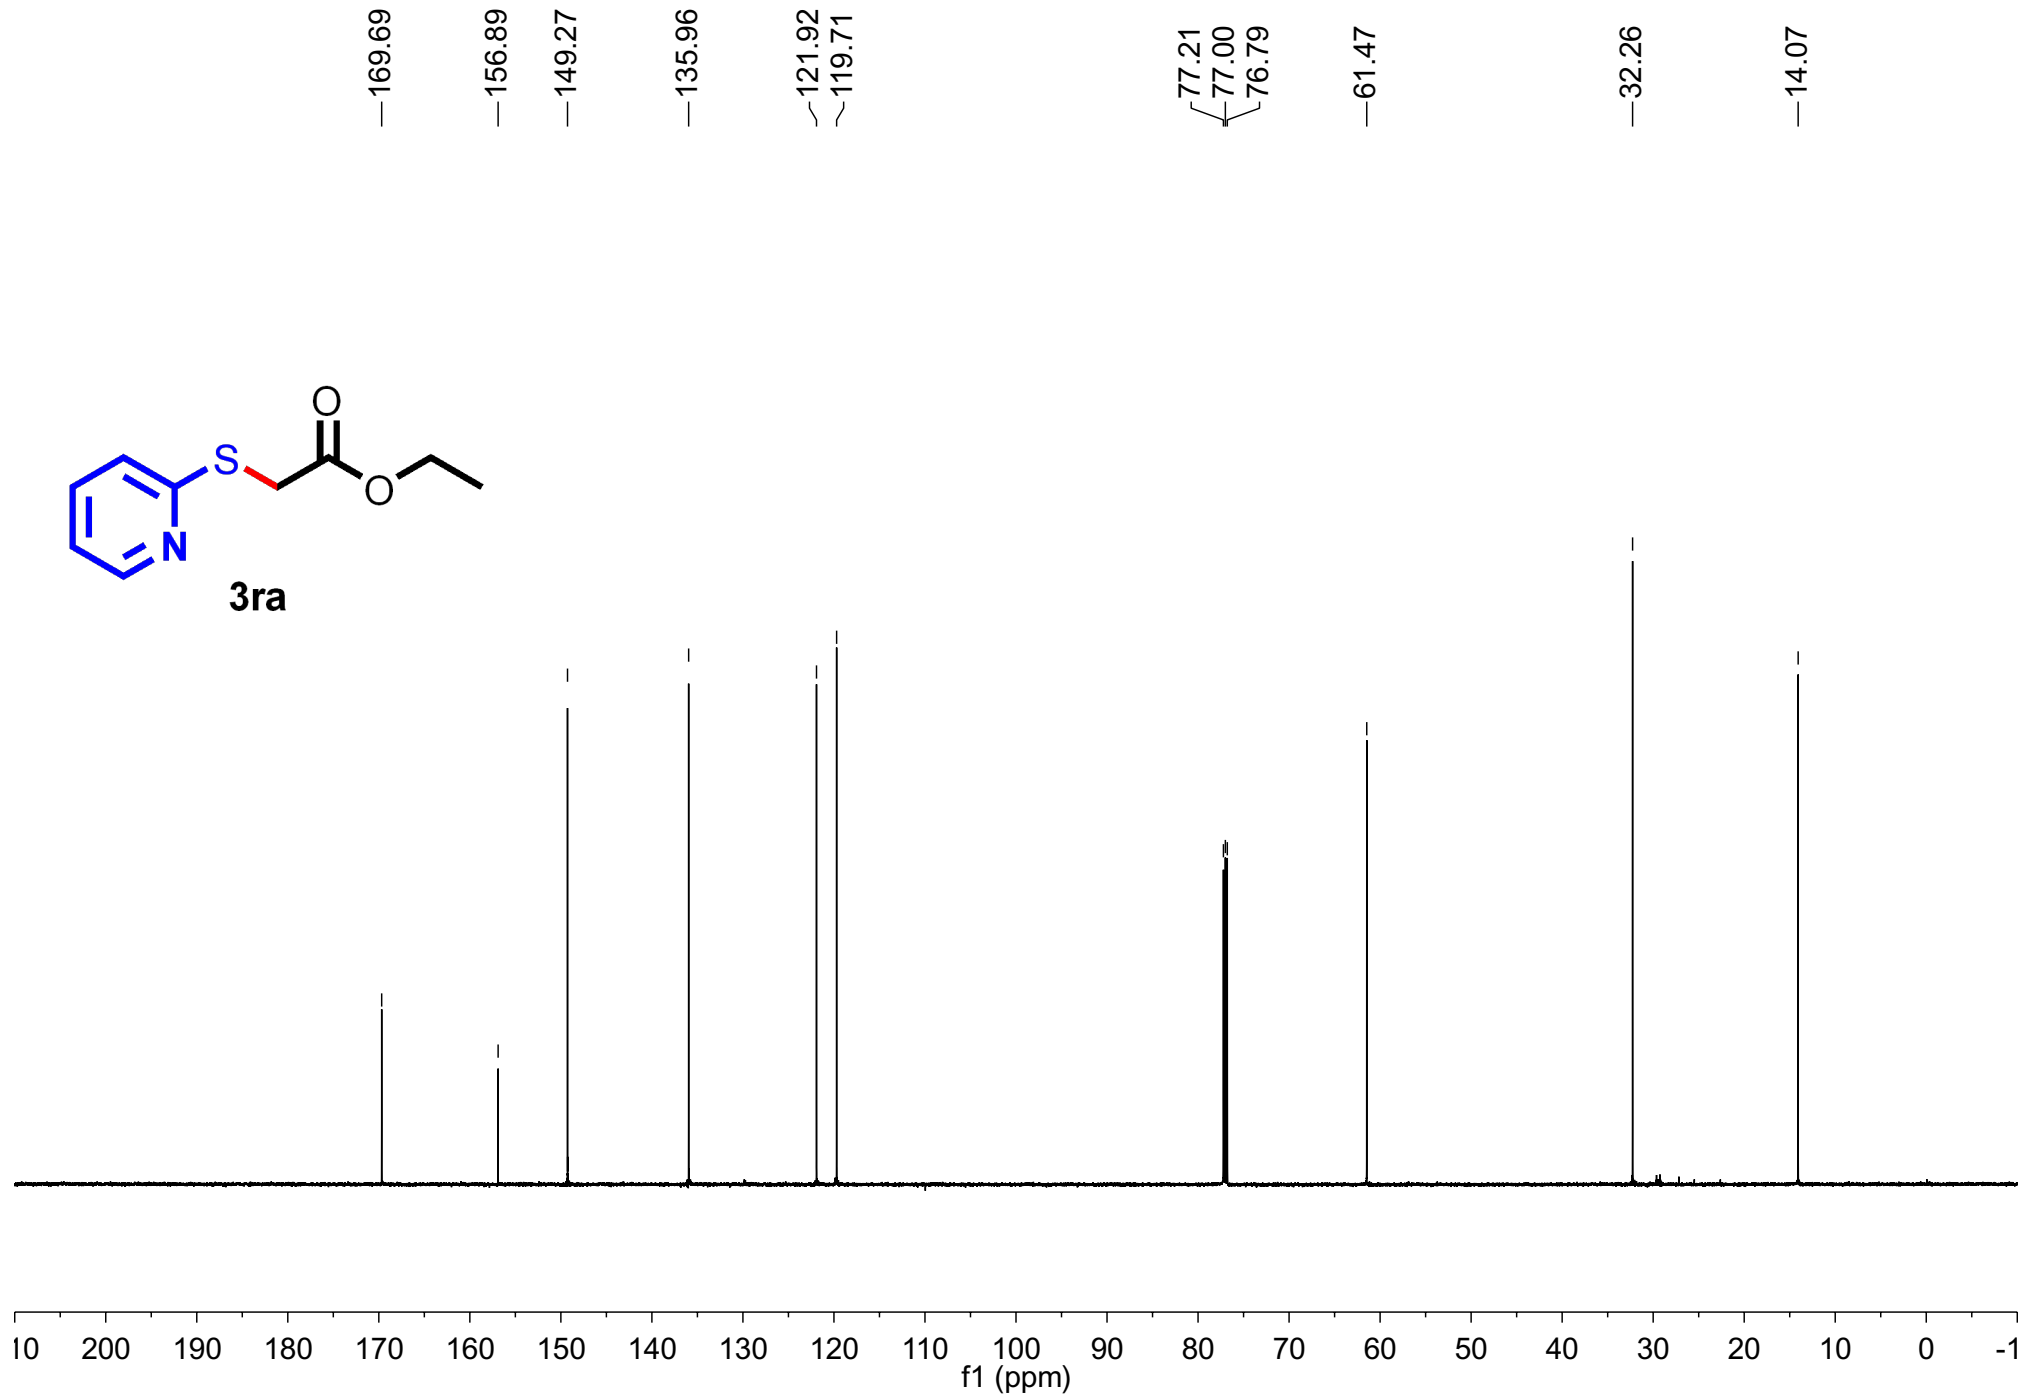

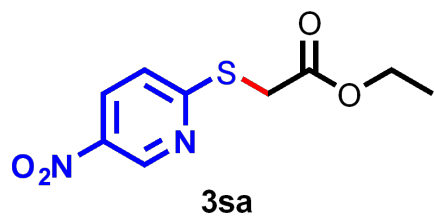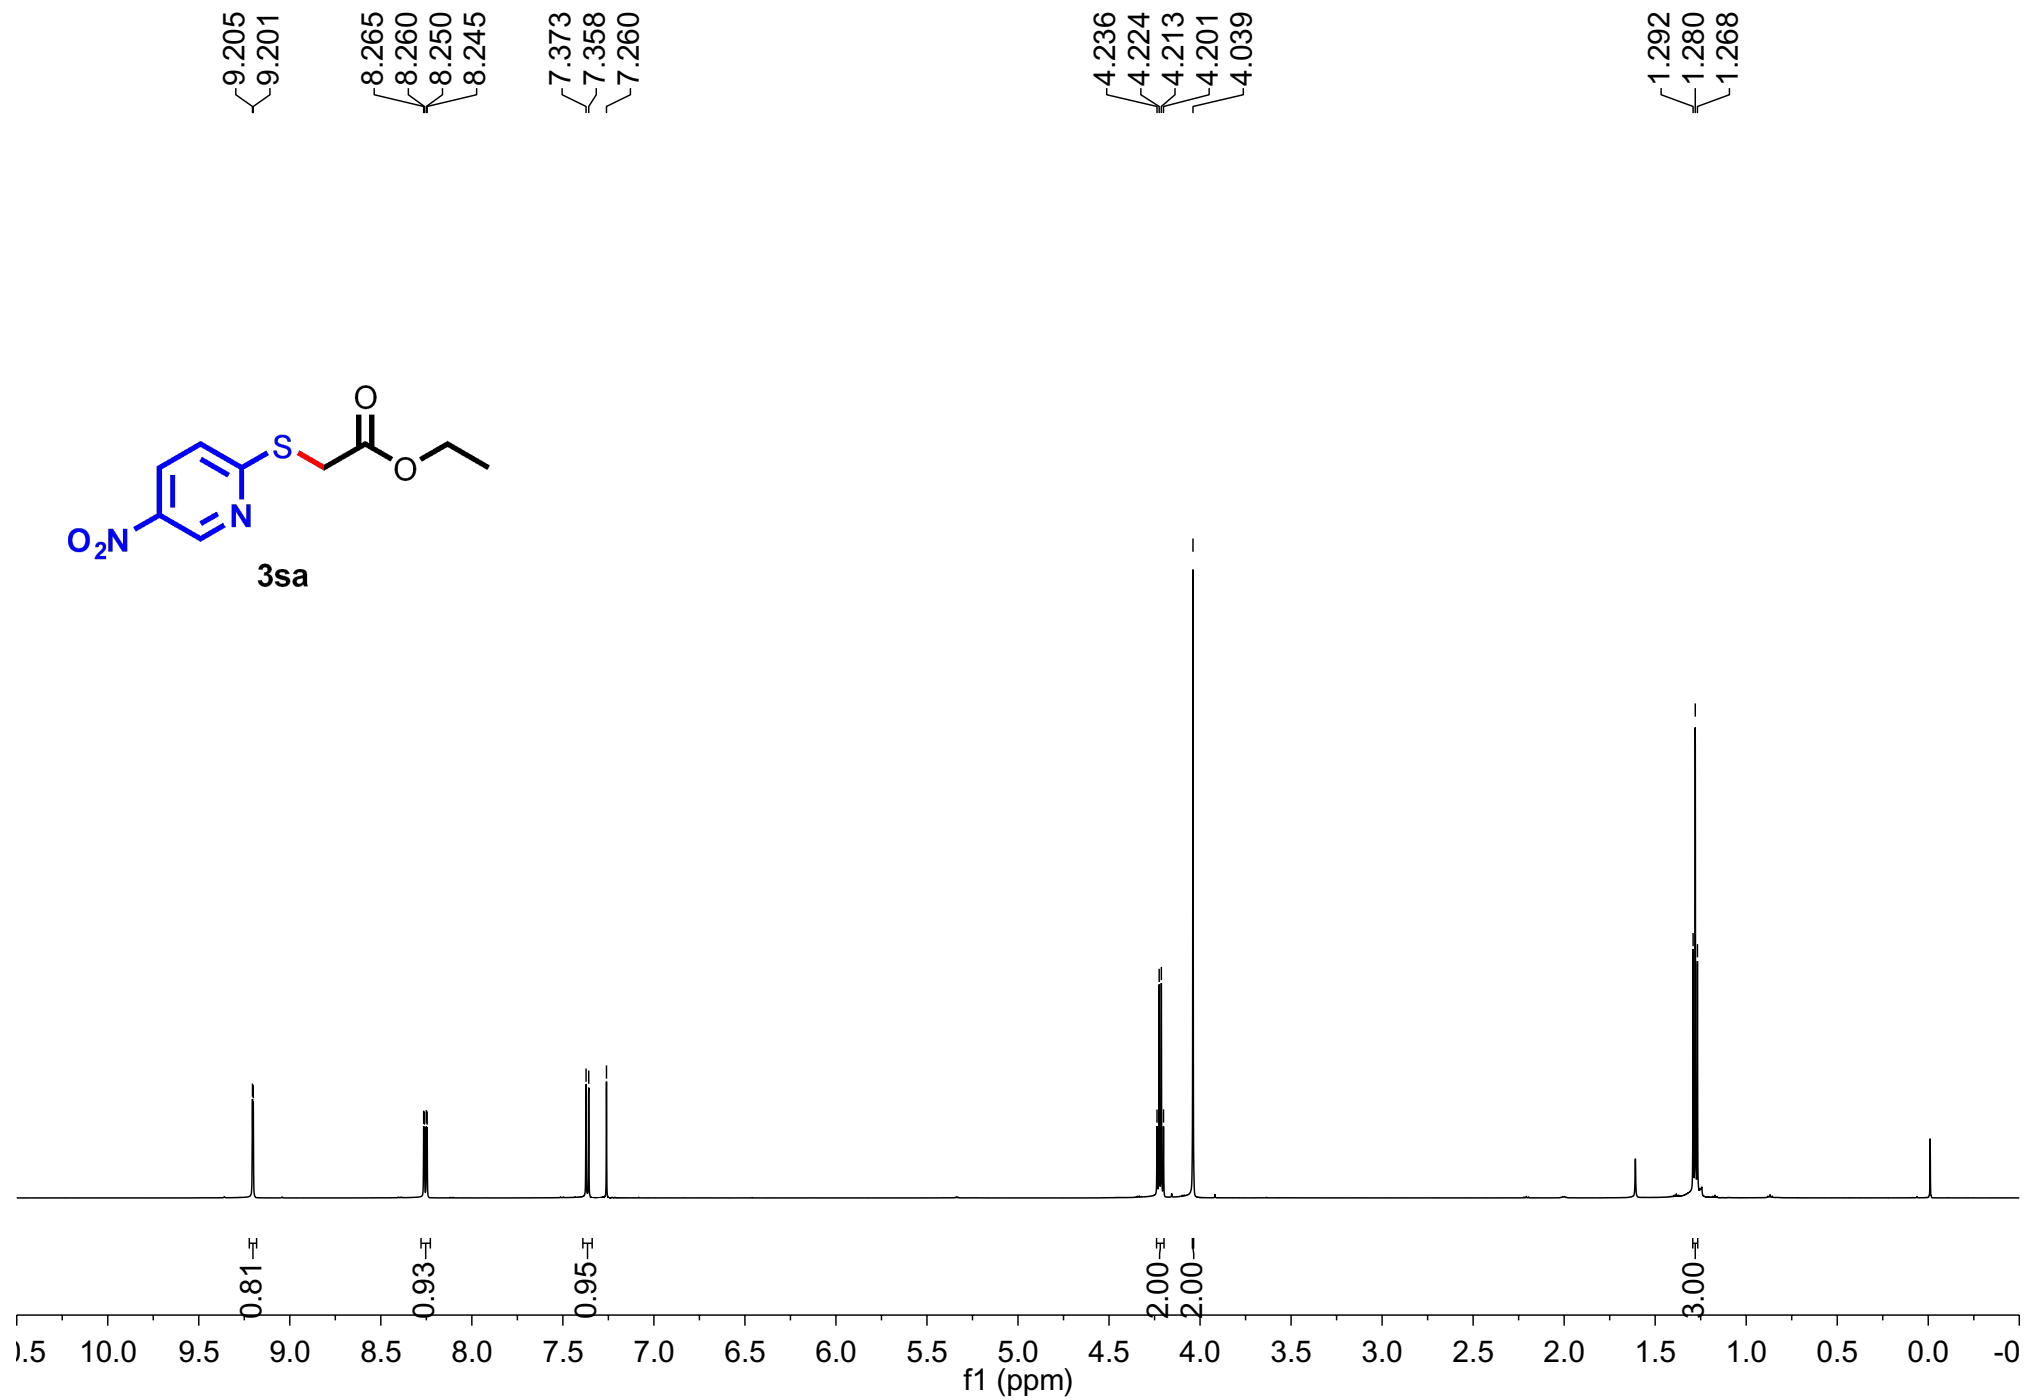

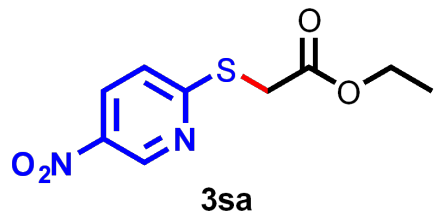

—168.54  
—165.40

—144.86  
—141.47

—130.59

—121.33

{ 77.21  
— 77.00  
{ 76.79

—61.93

—32.68

—14.12

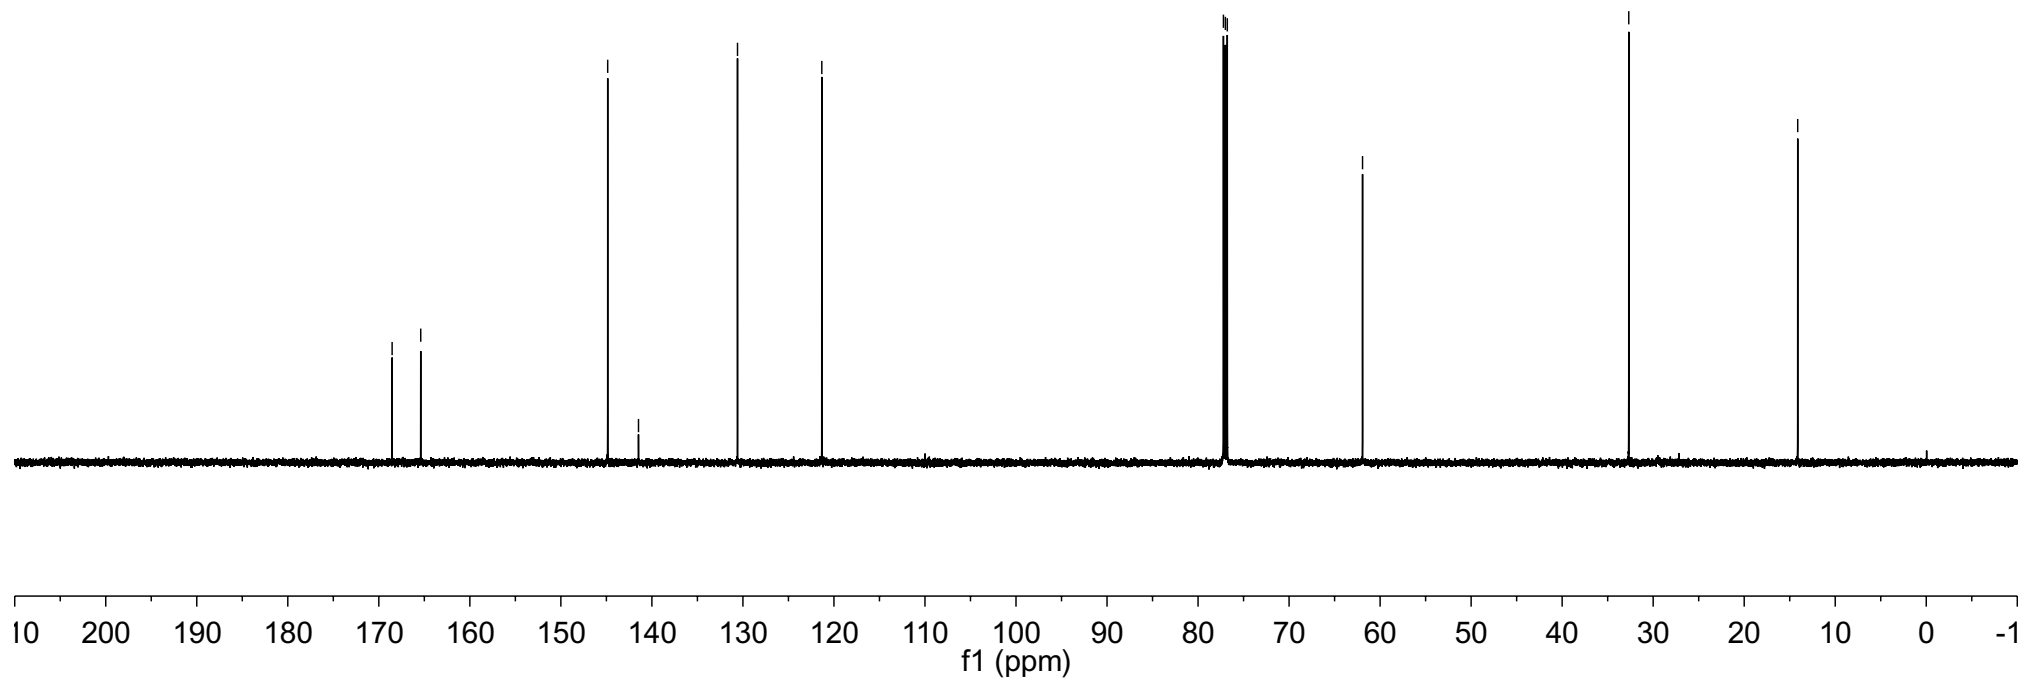

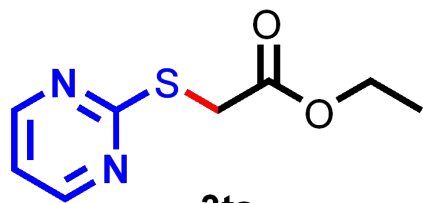

3ta

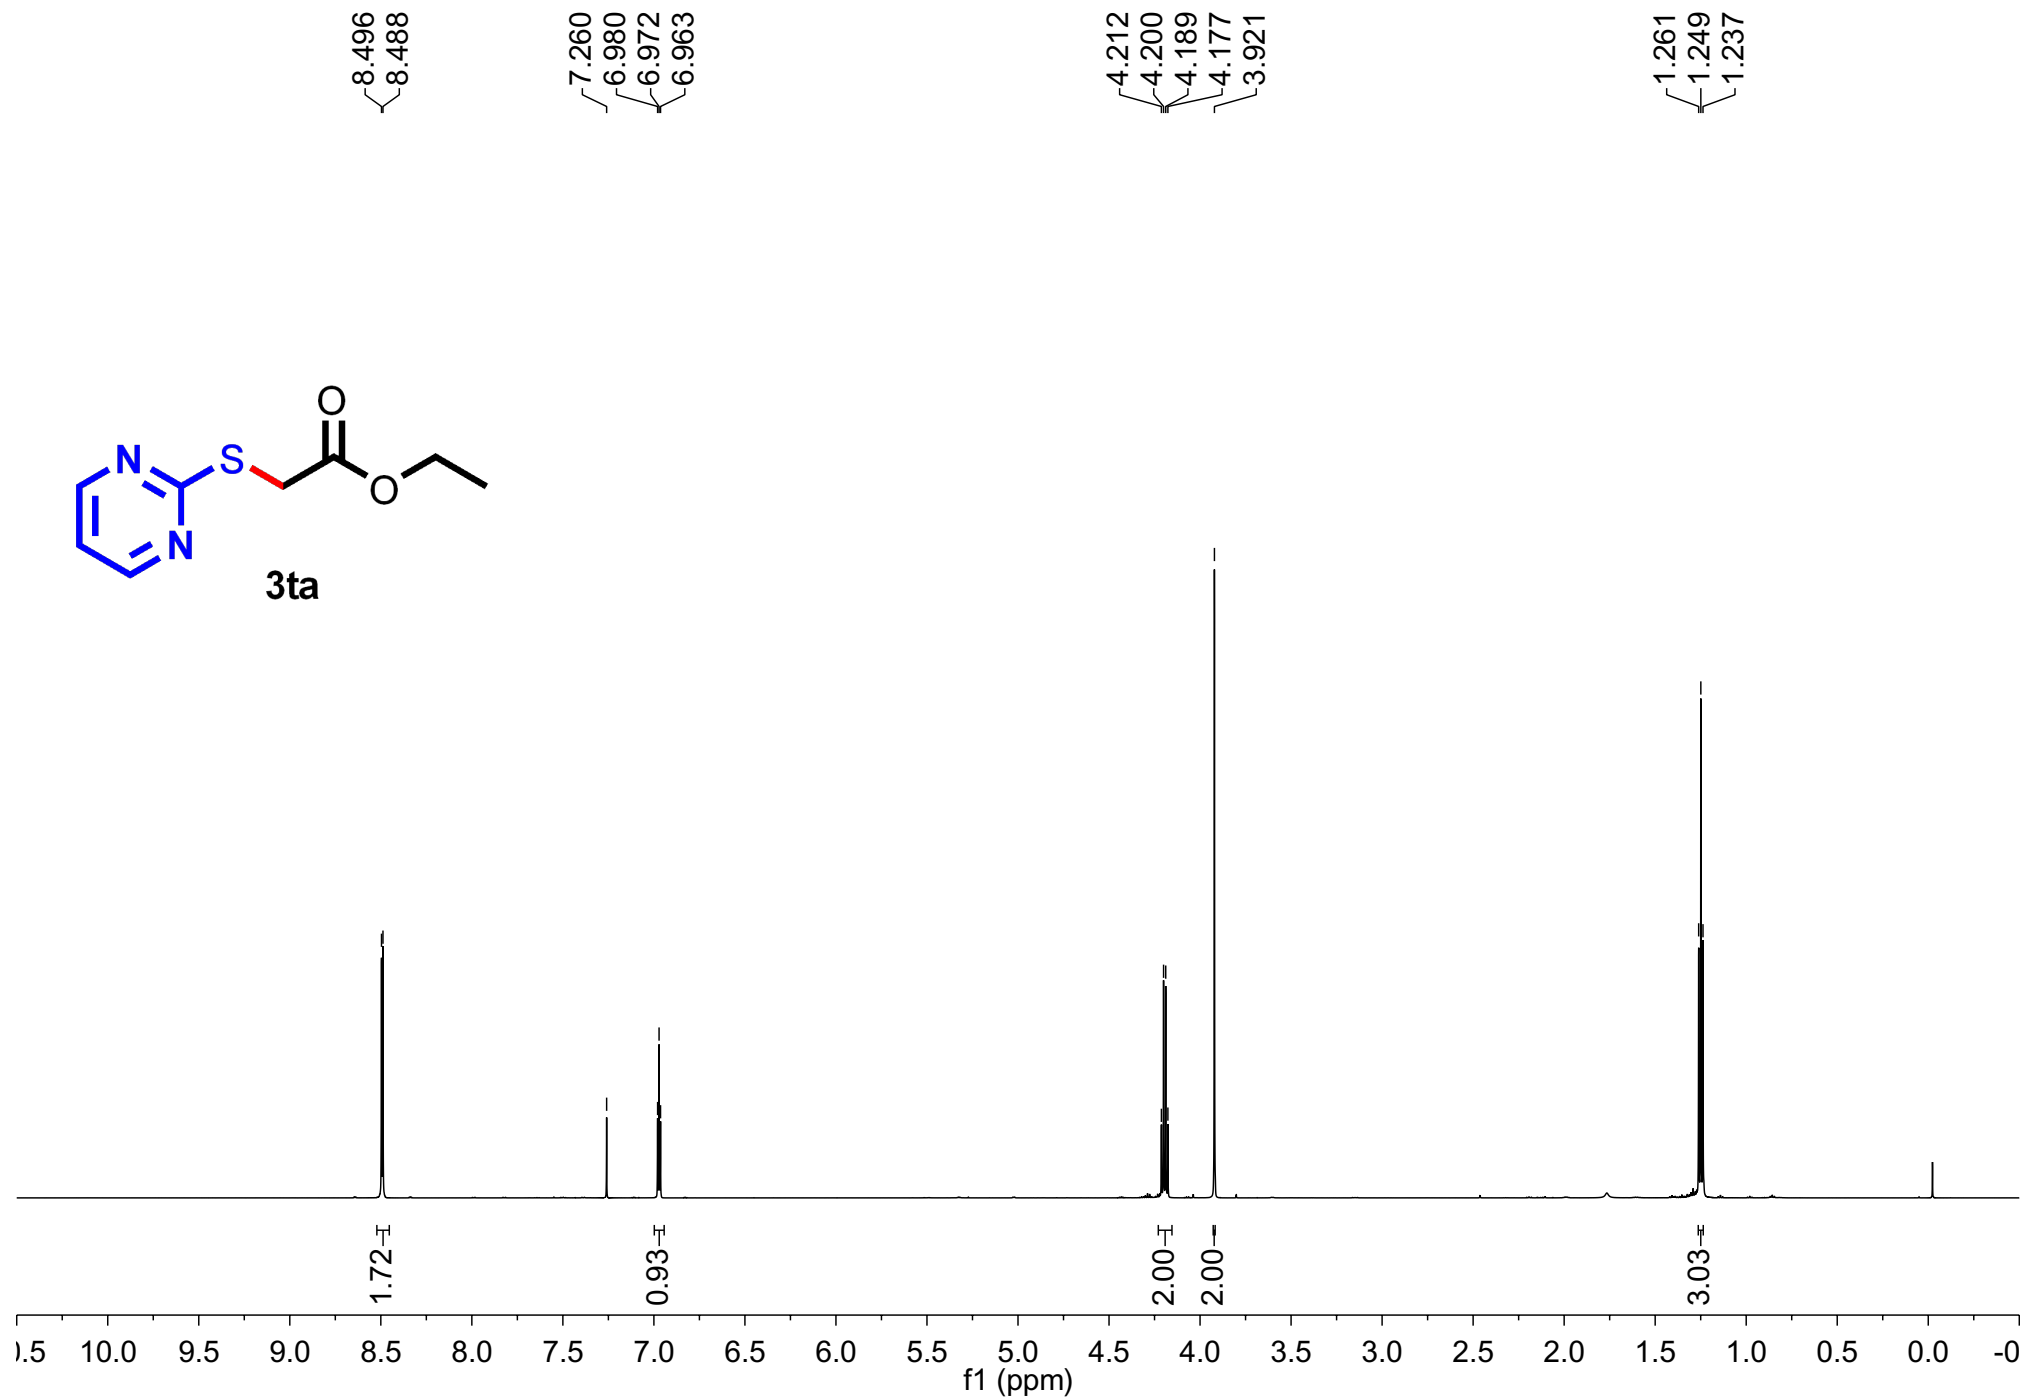

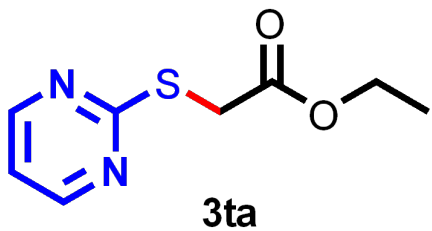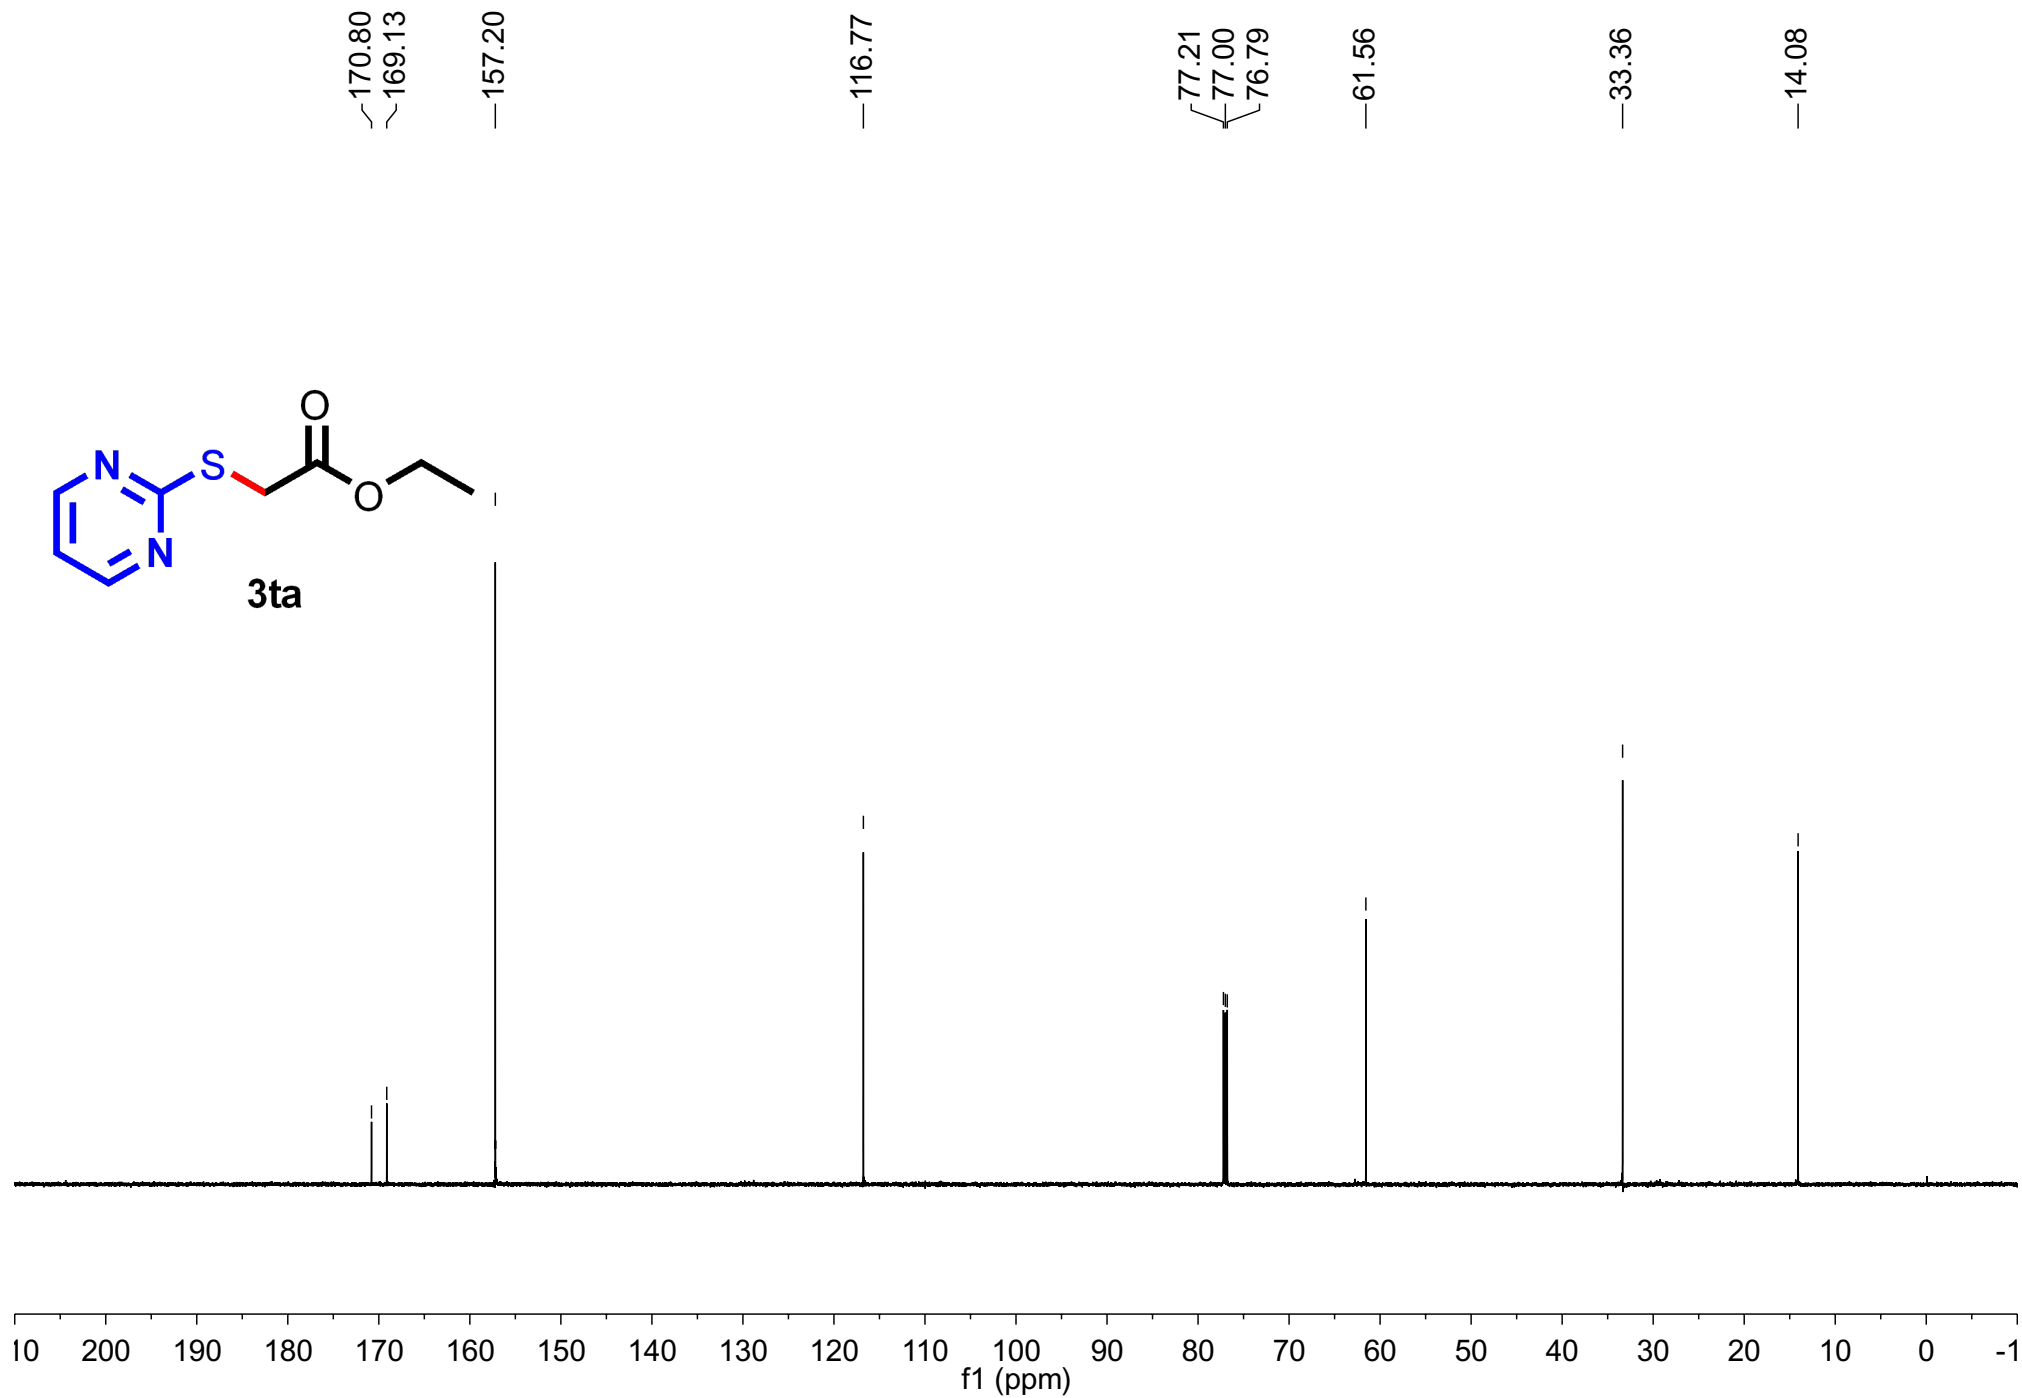

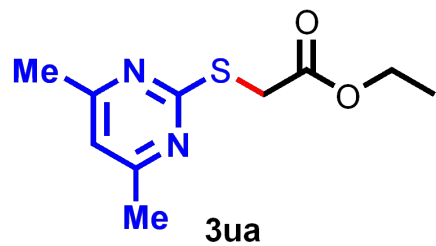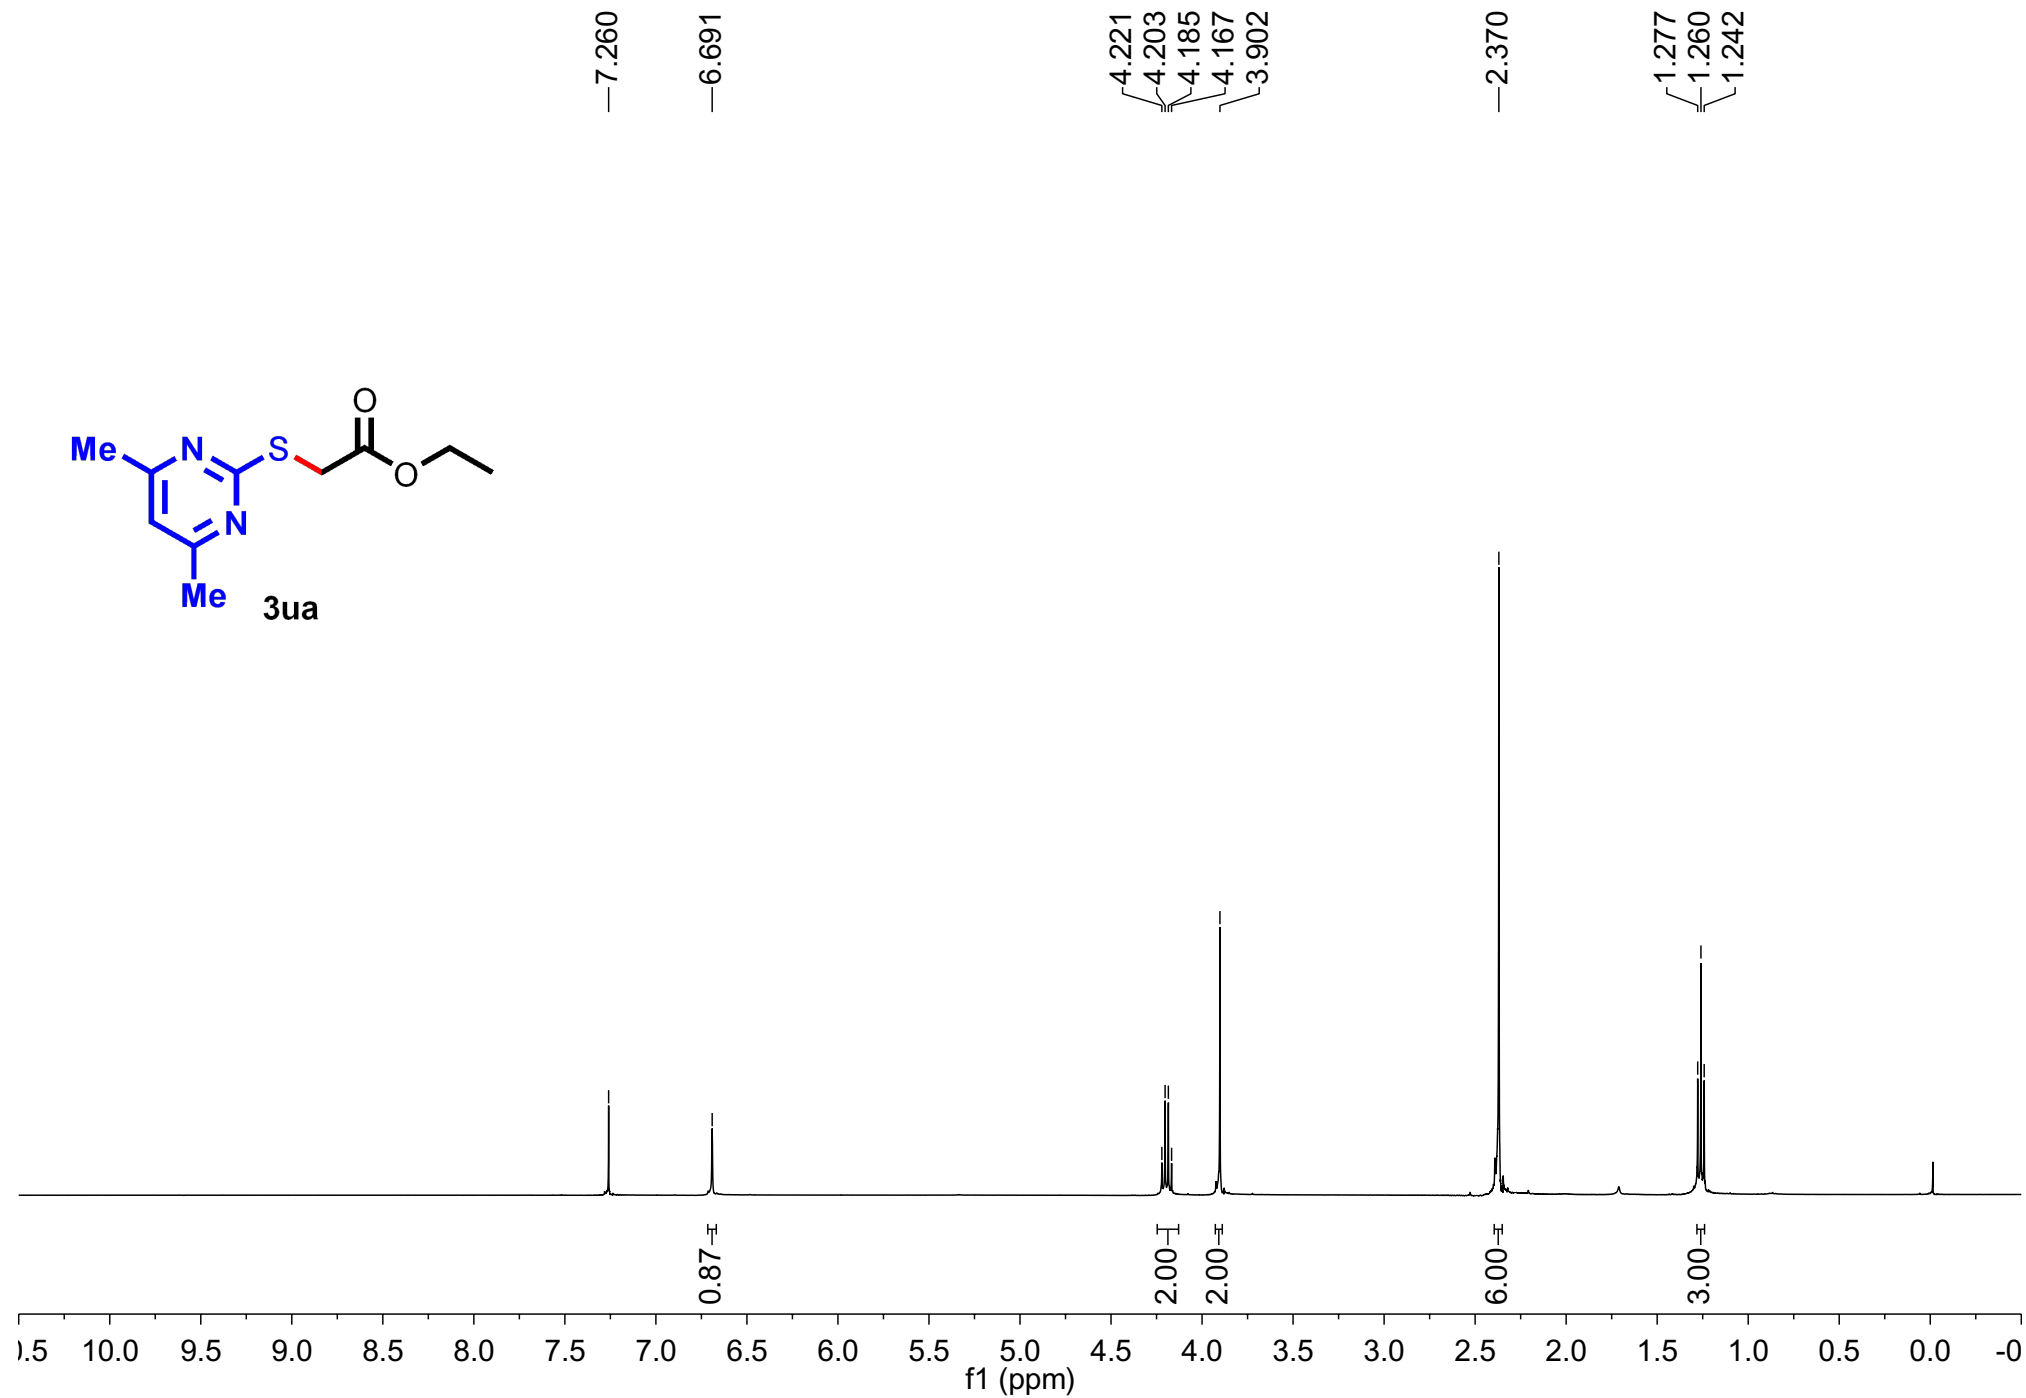

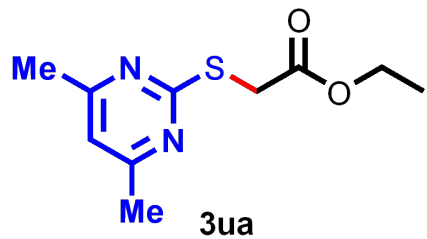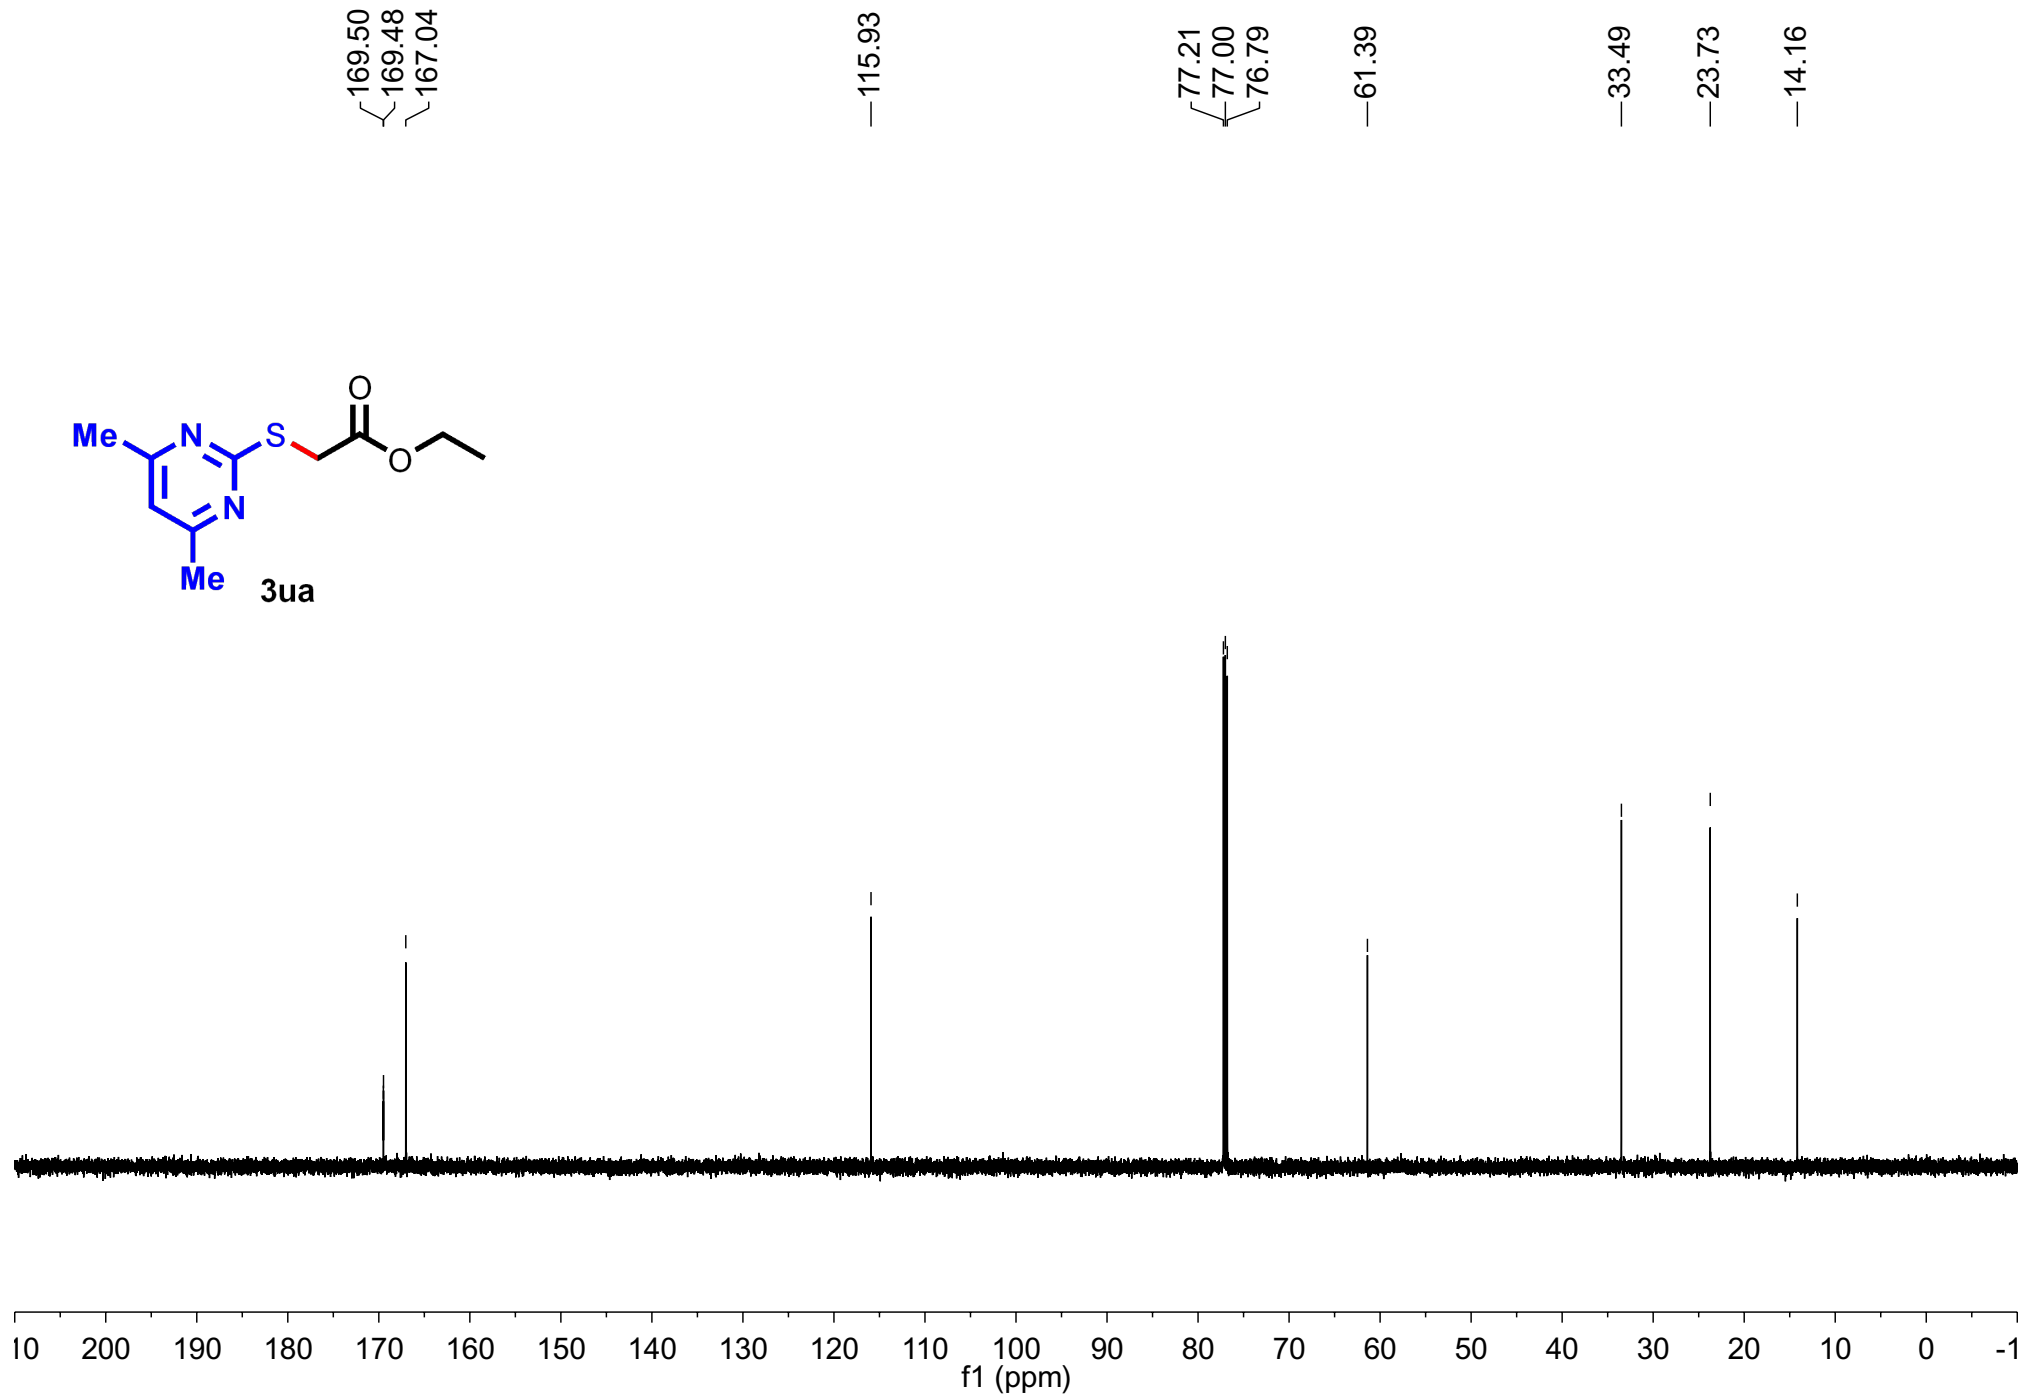

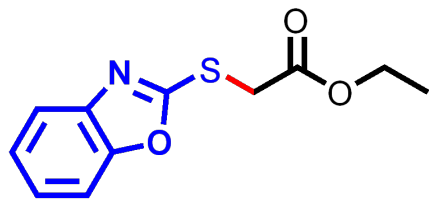

3va

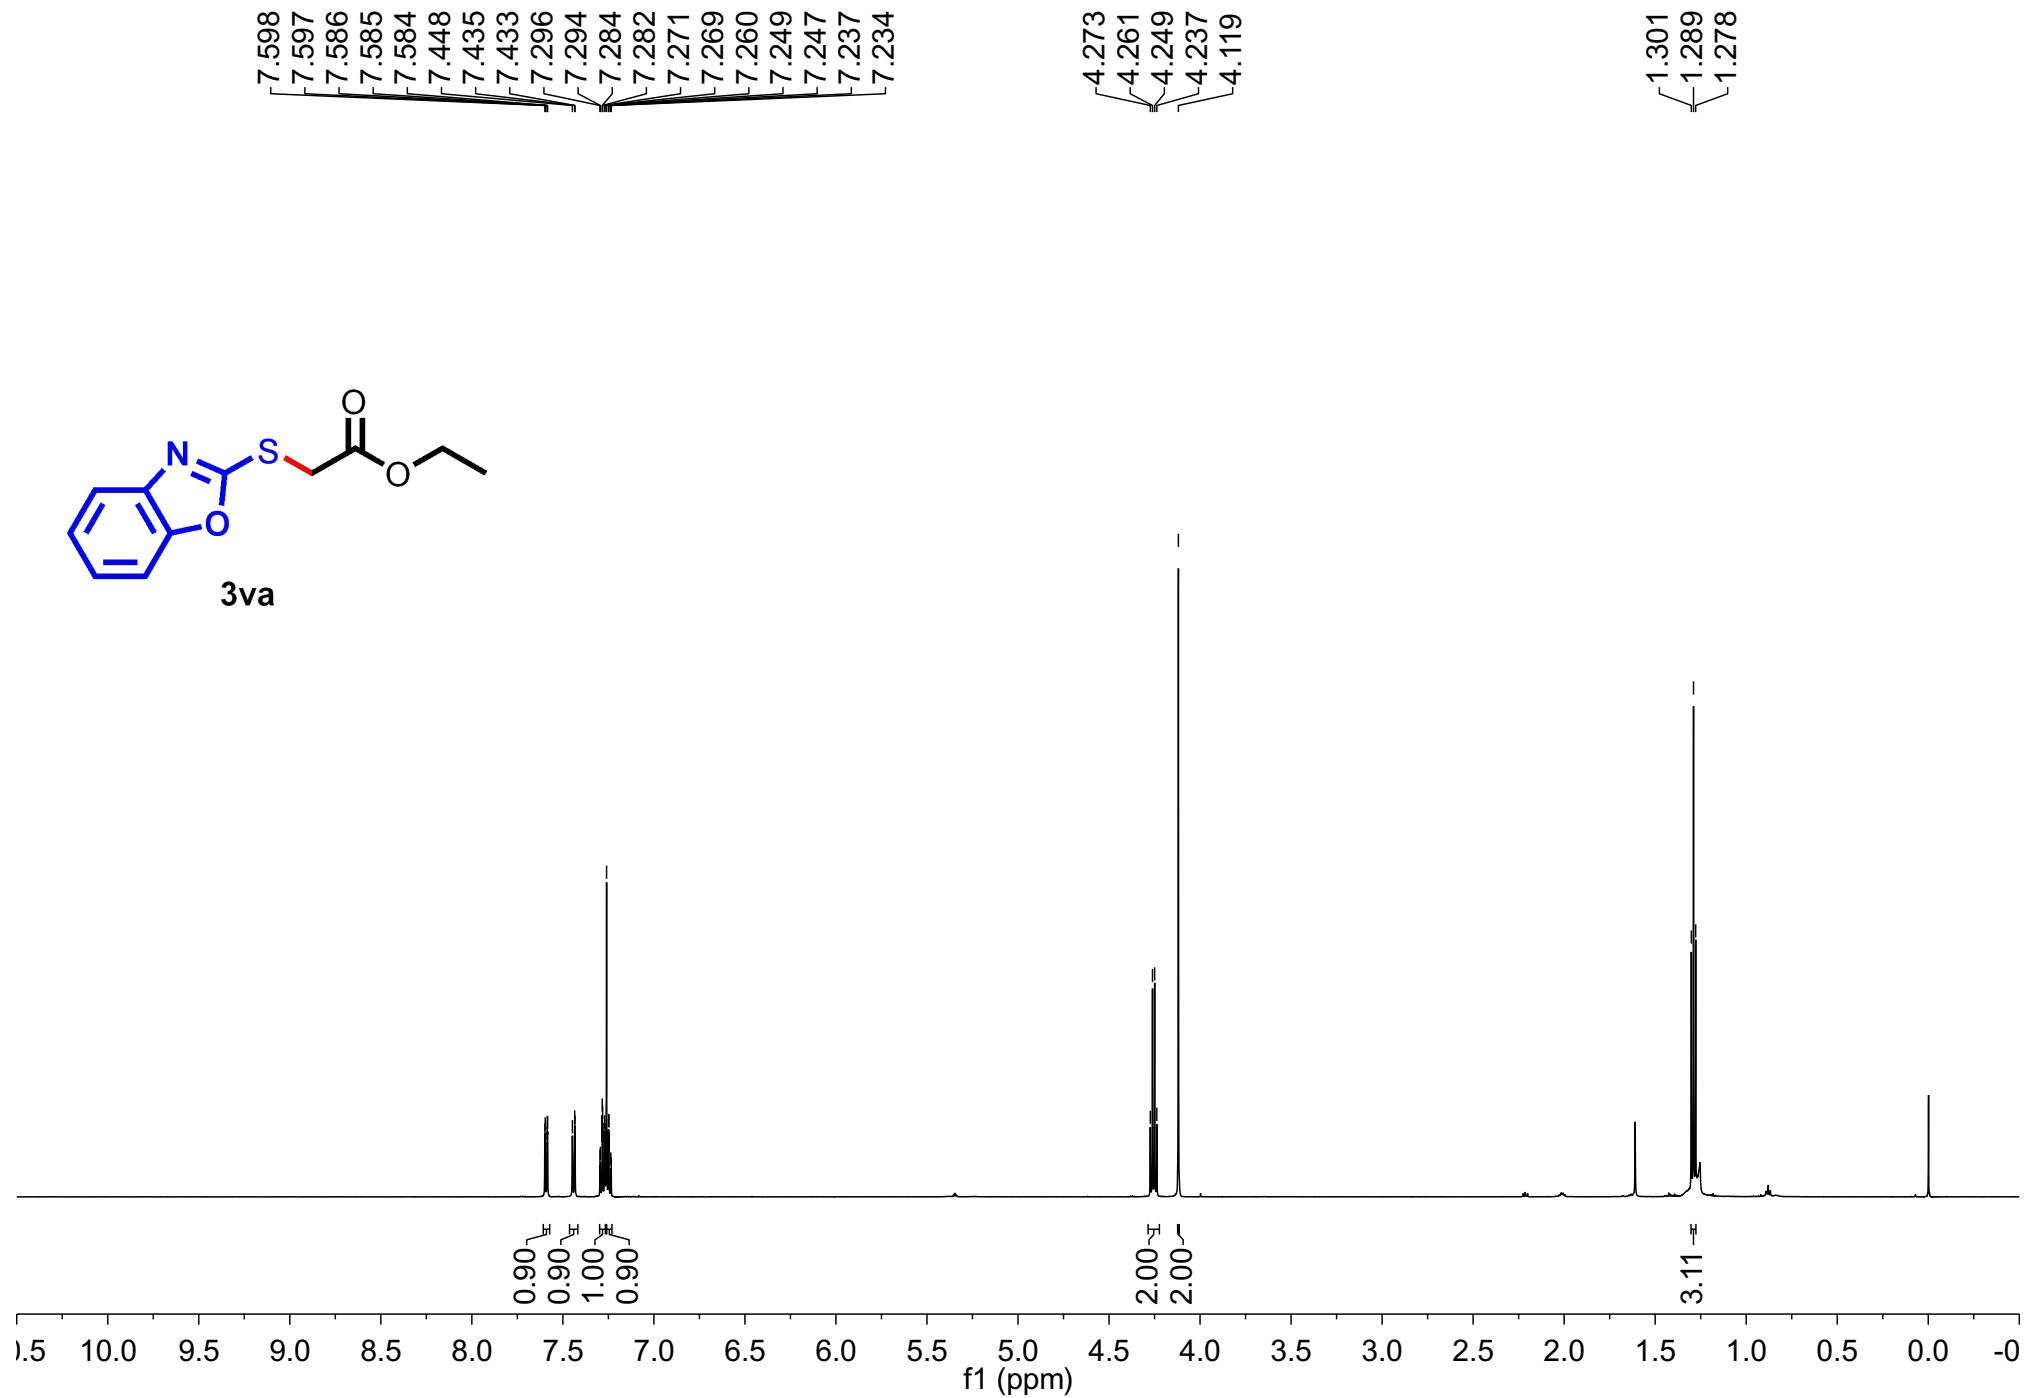



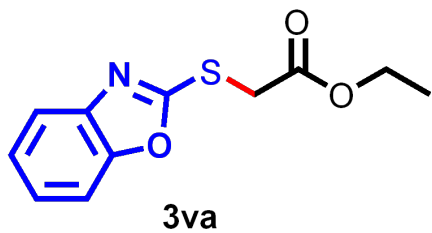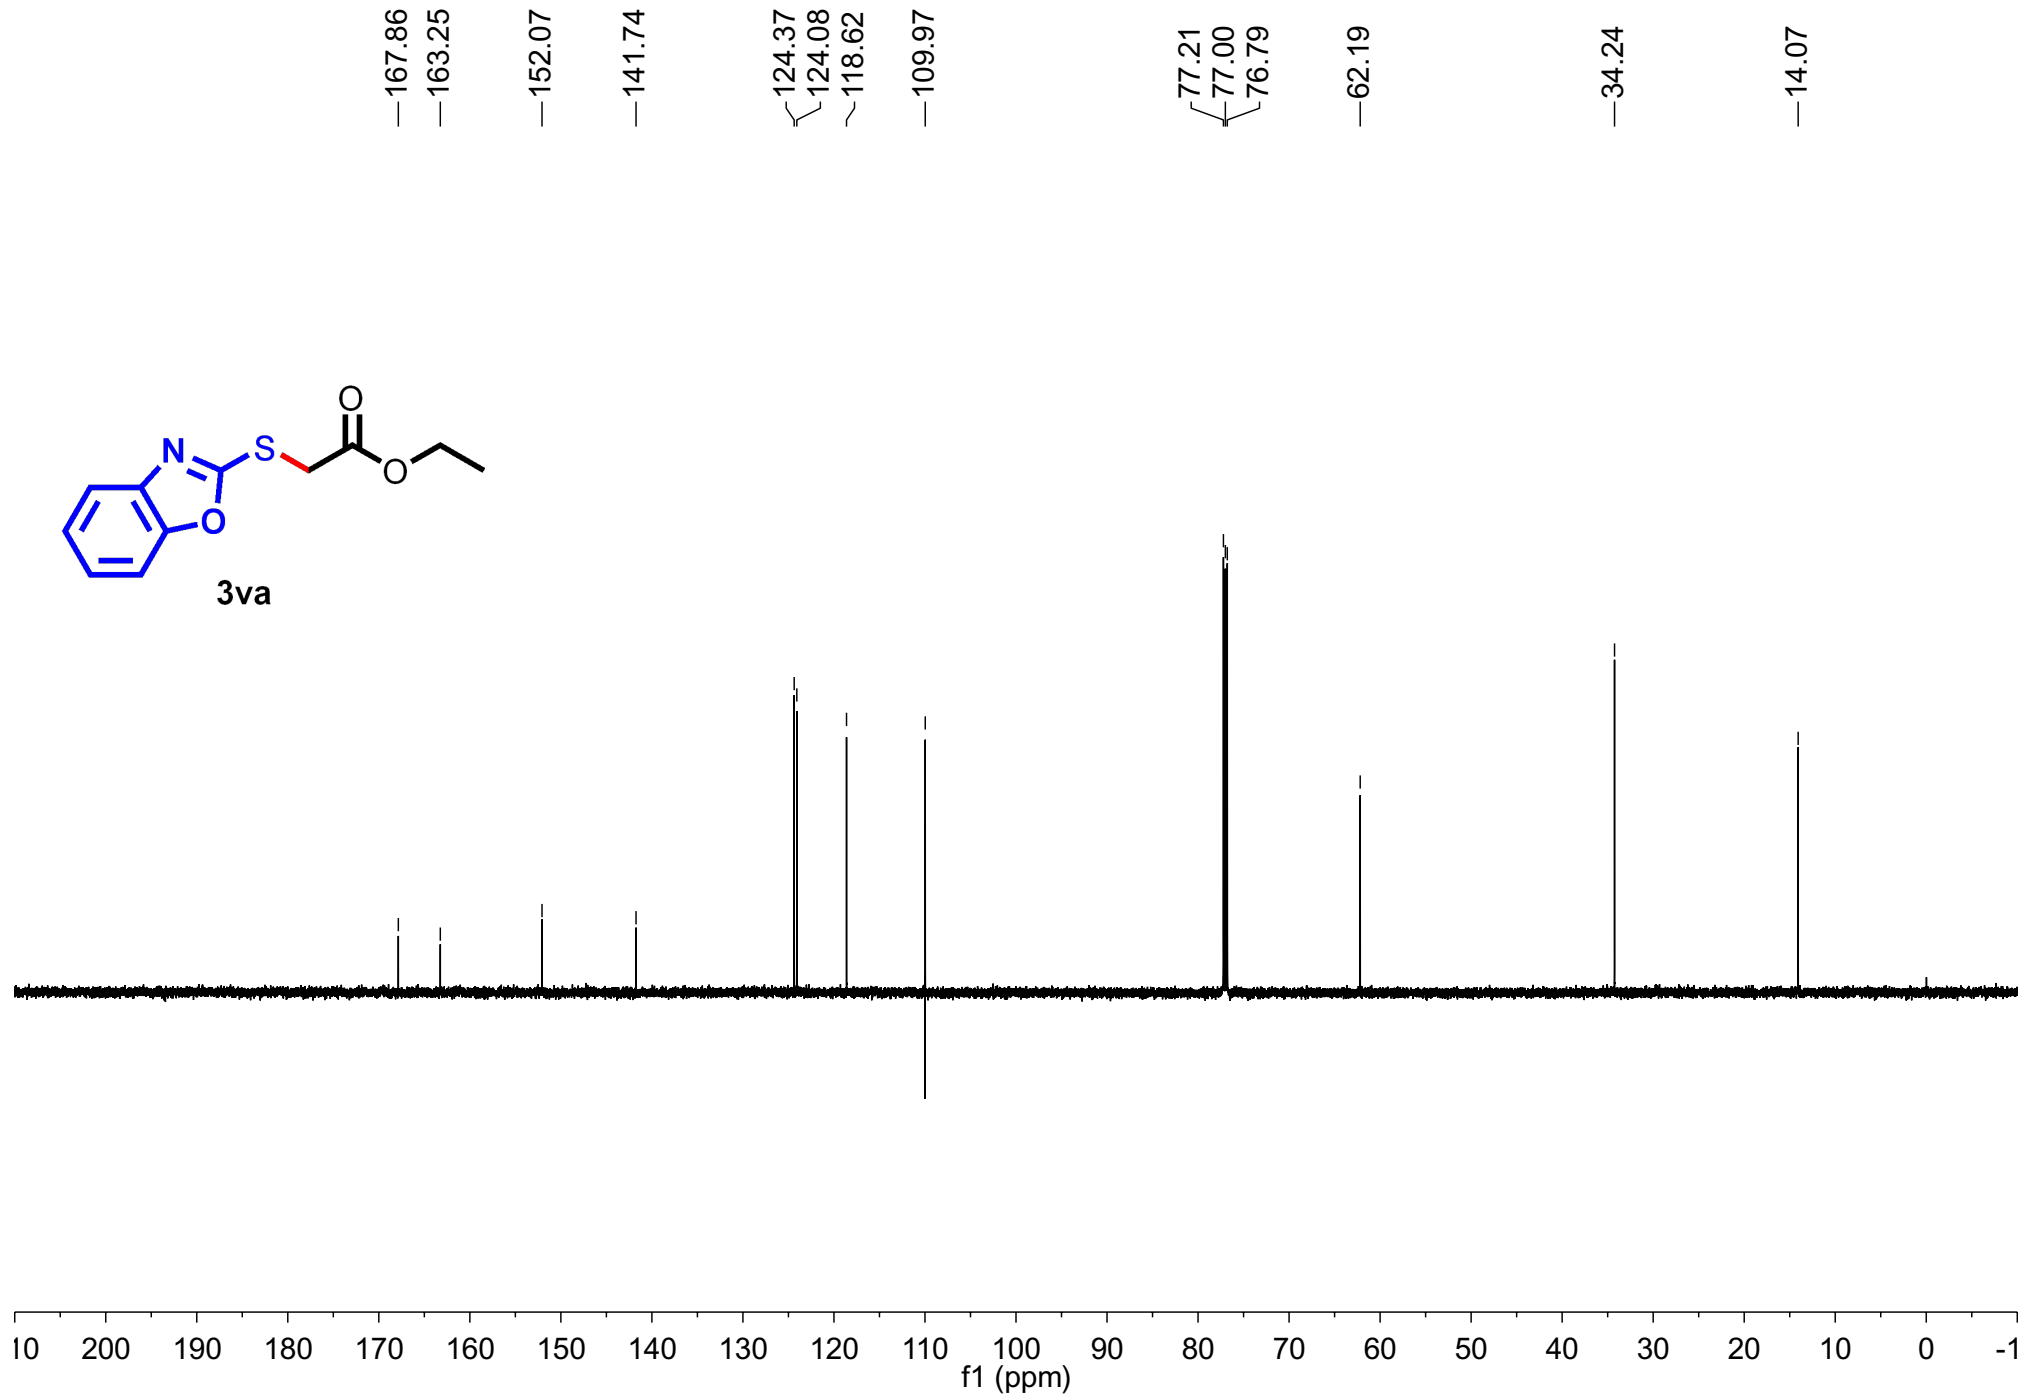

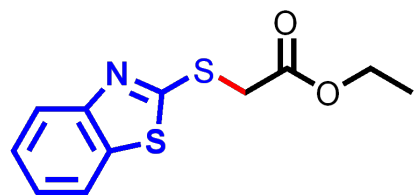

3wa

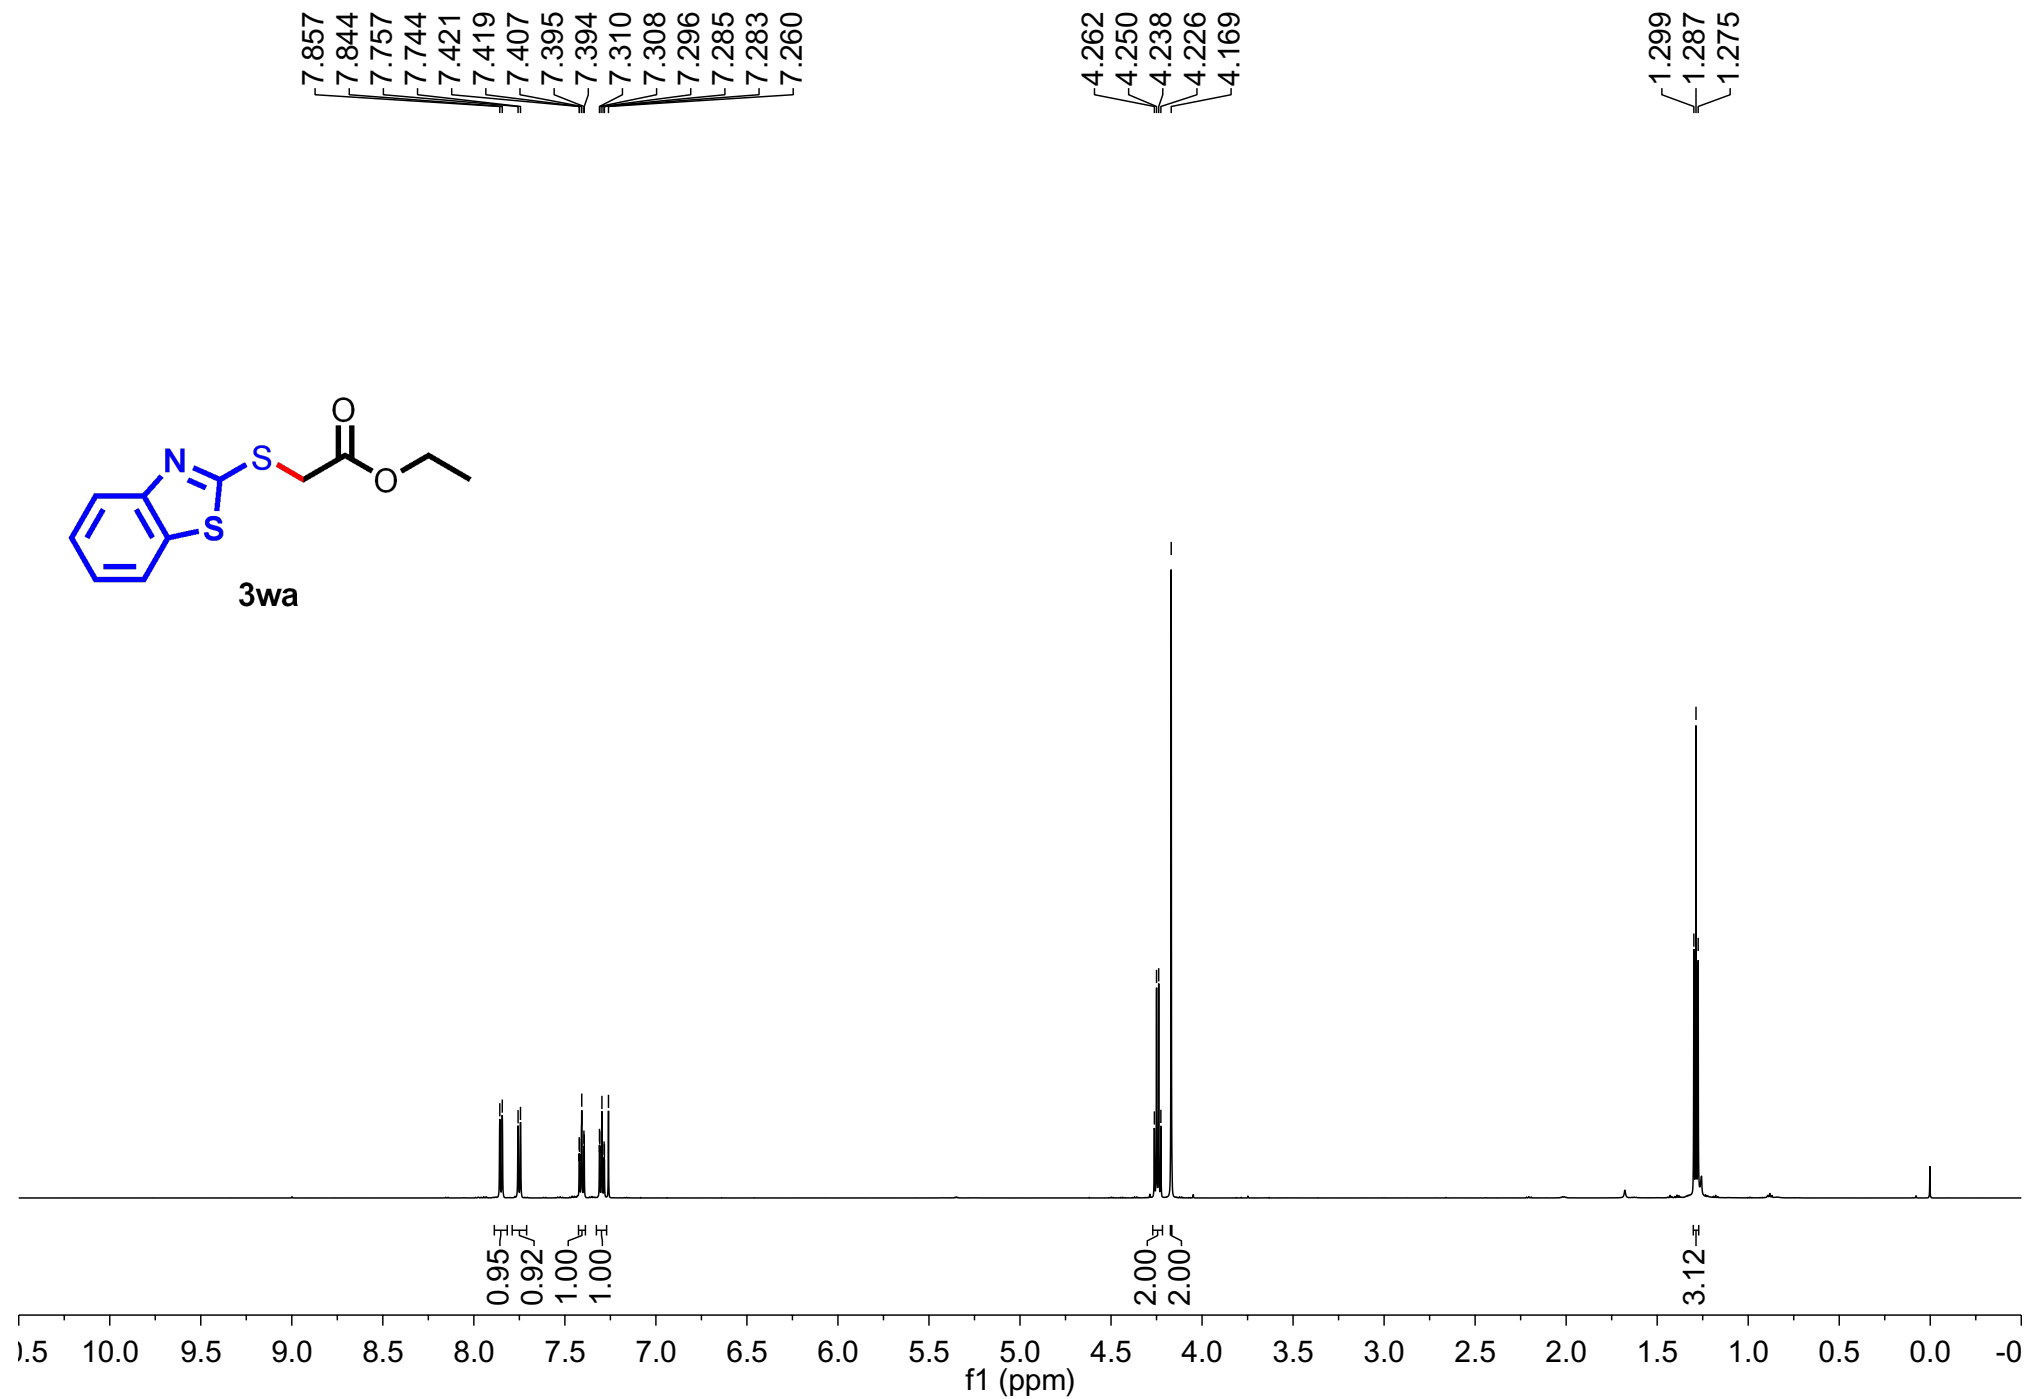

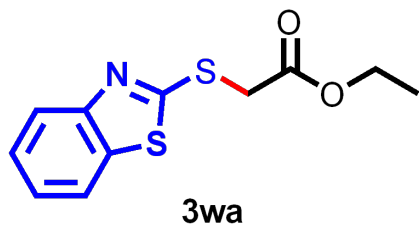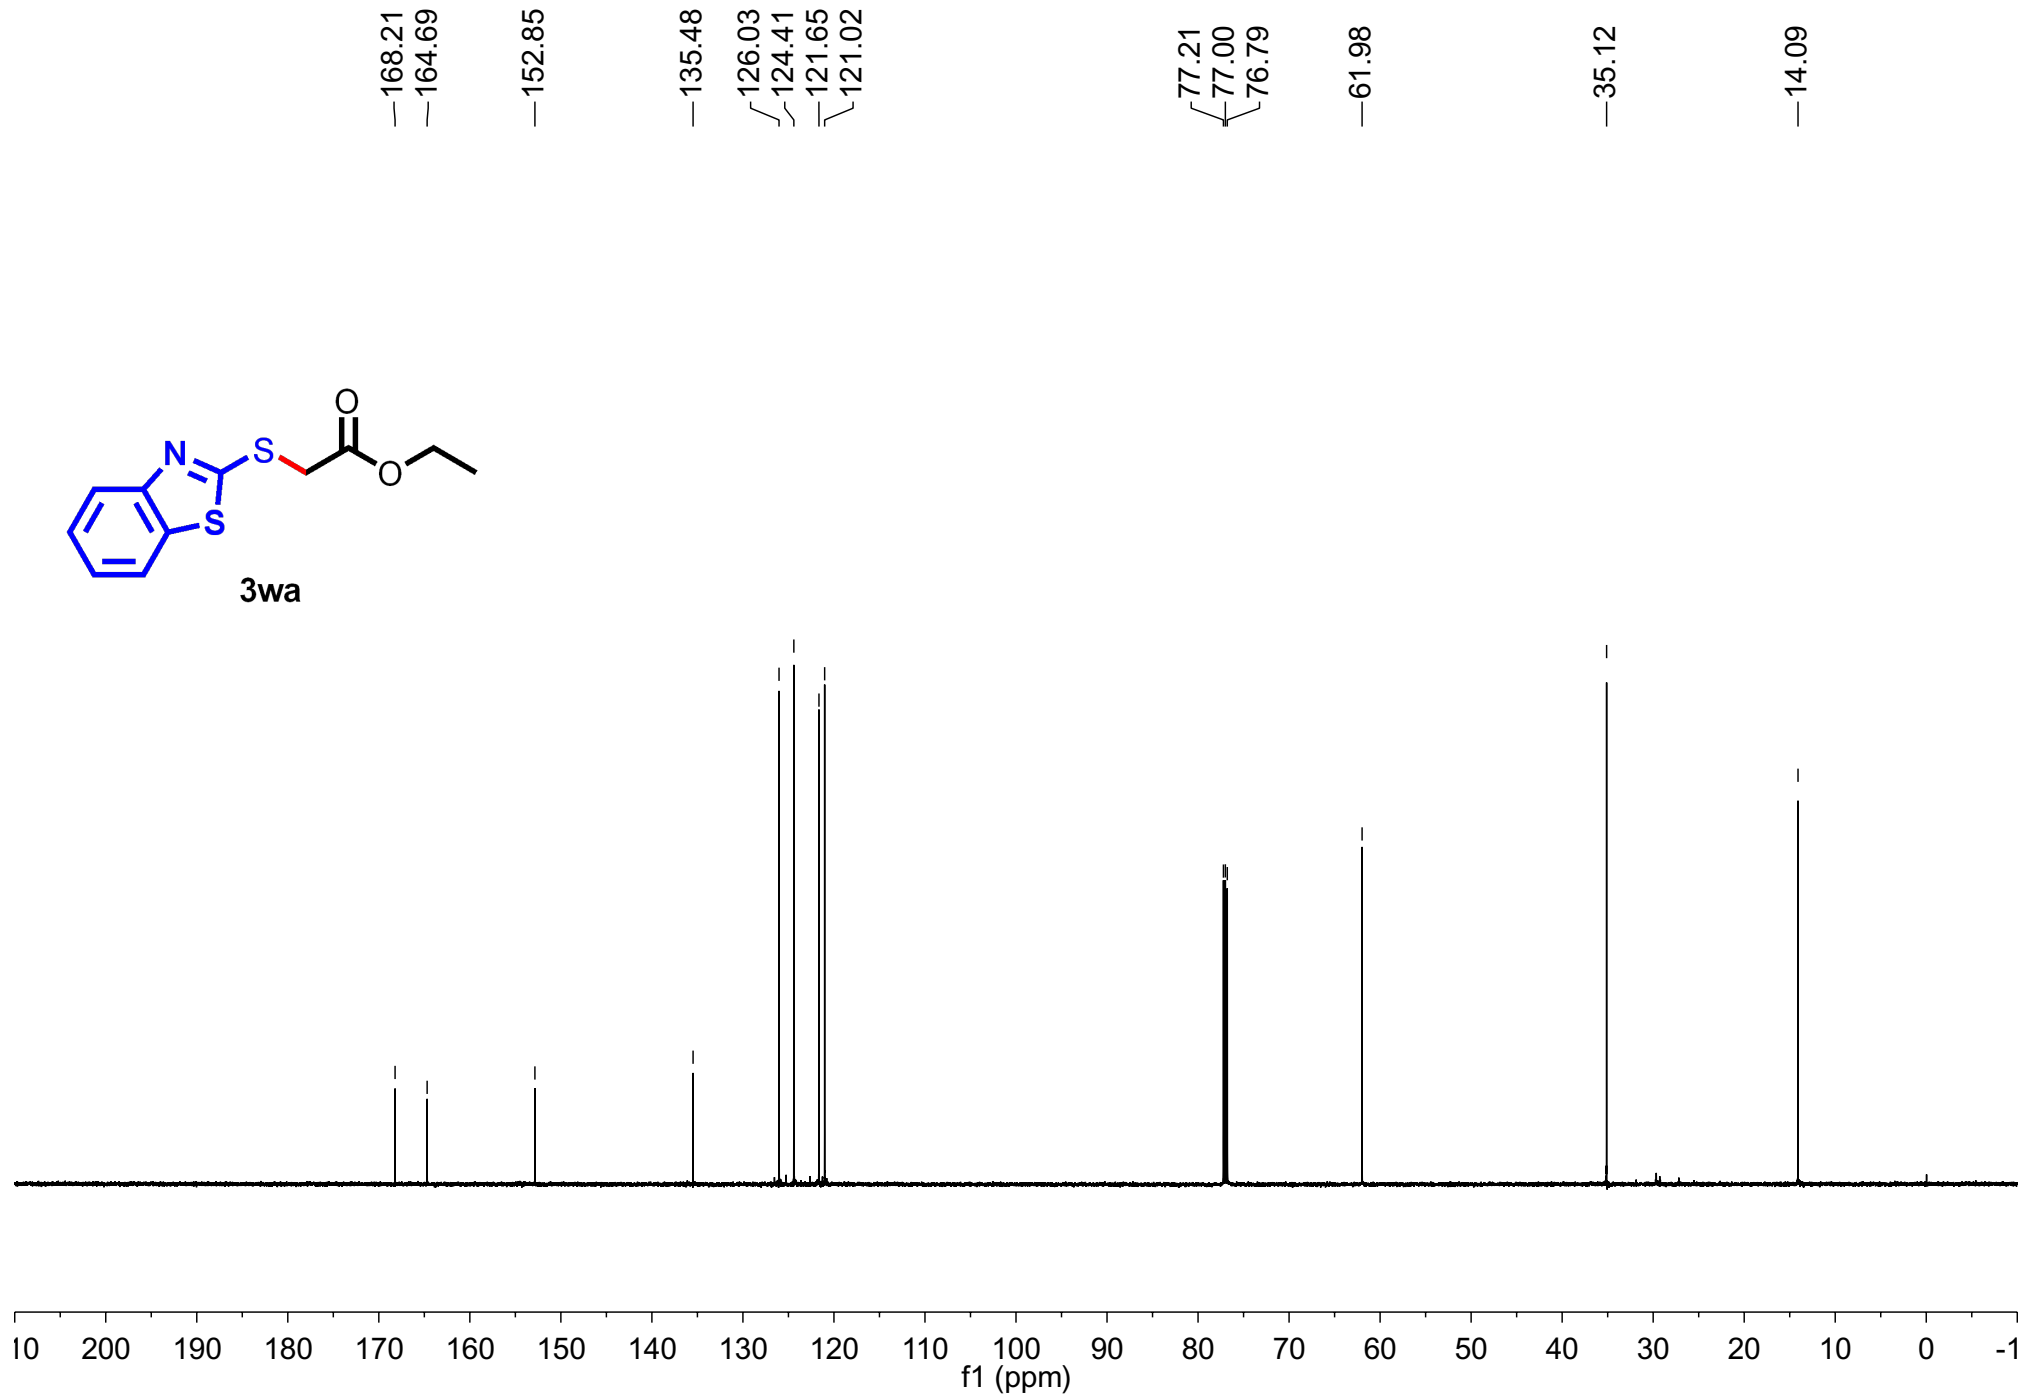

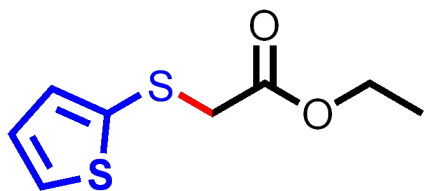

3xa

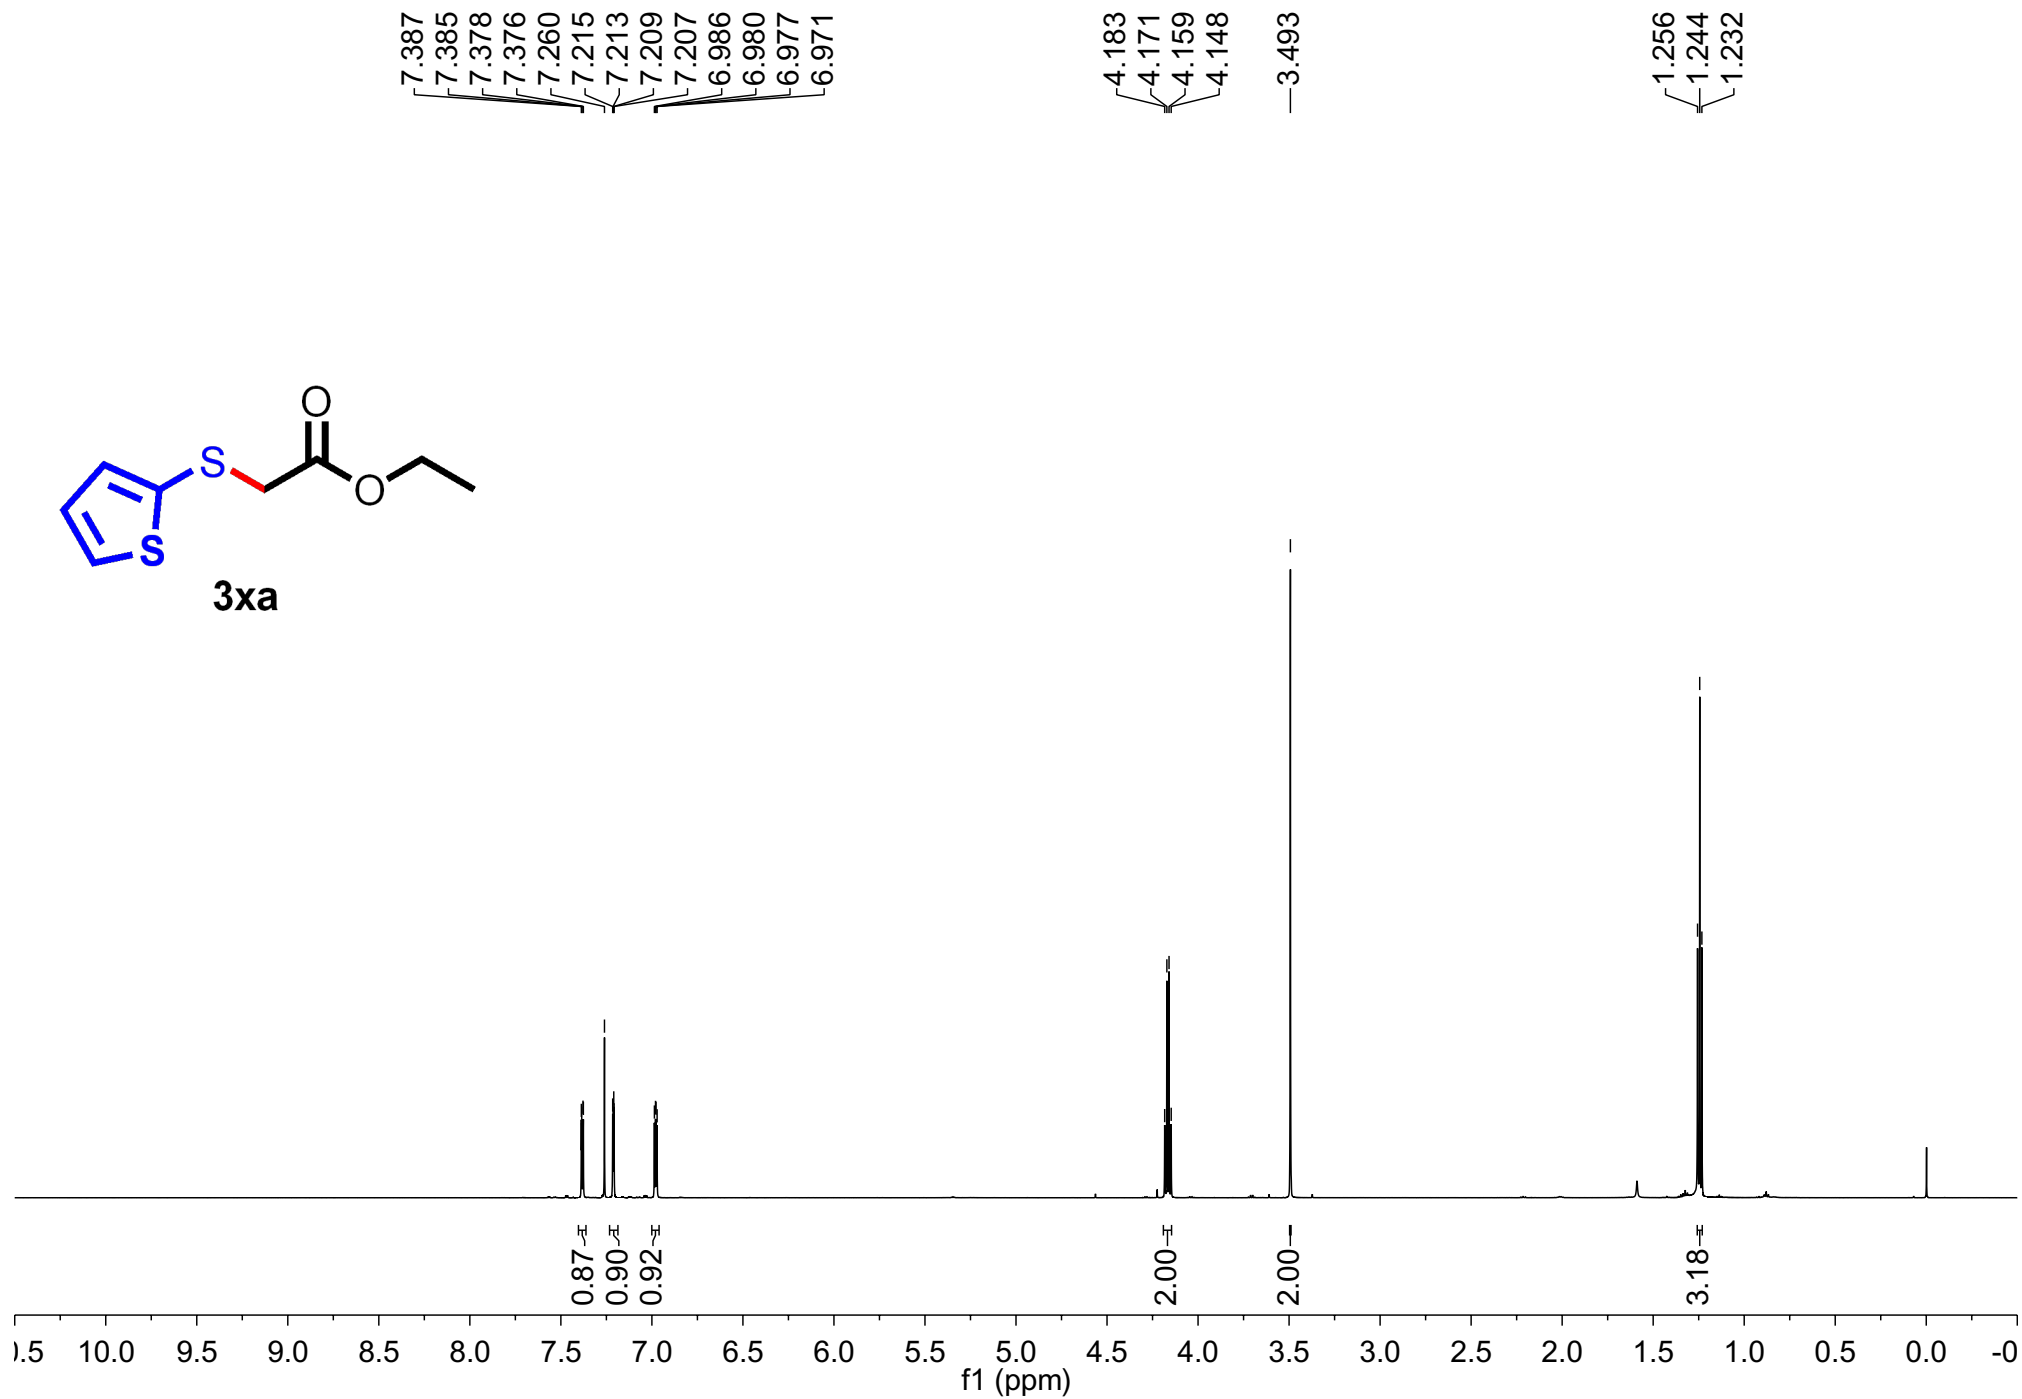

CARBON\_01

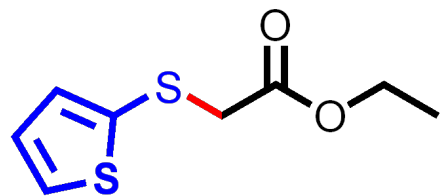

3xa

—169.31

135.03  
132.40  
130.45  
127.56

77.21  
77.00  
76.79

—61.49

—40.96

—14.08

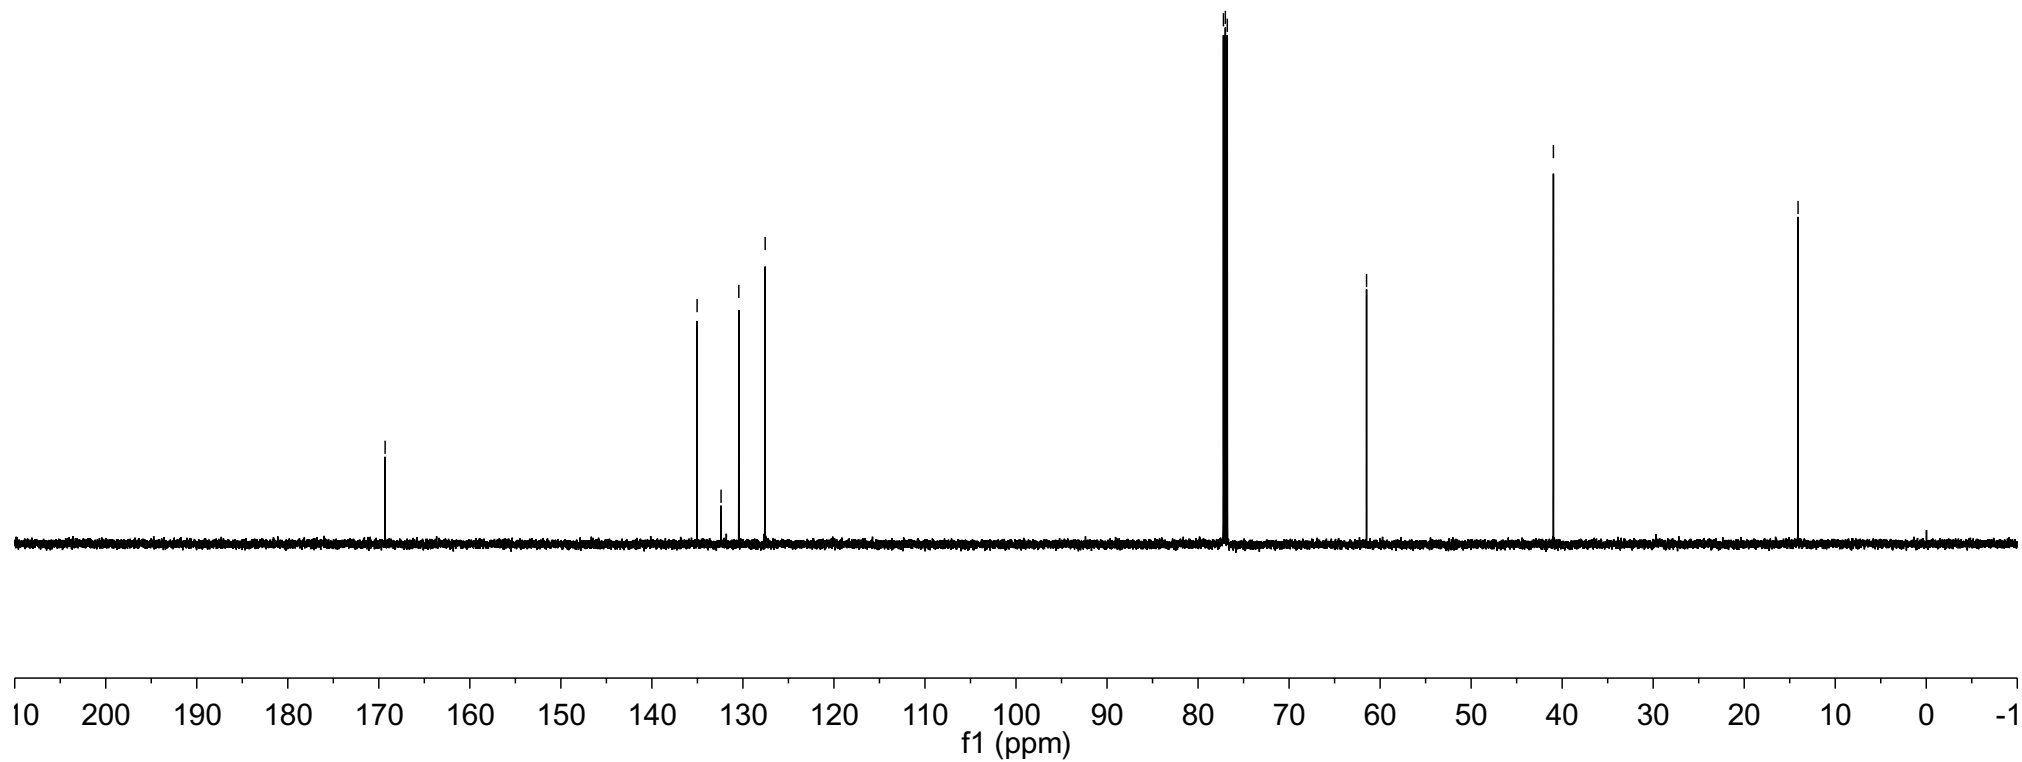

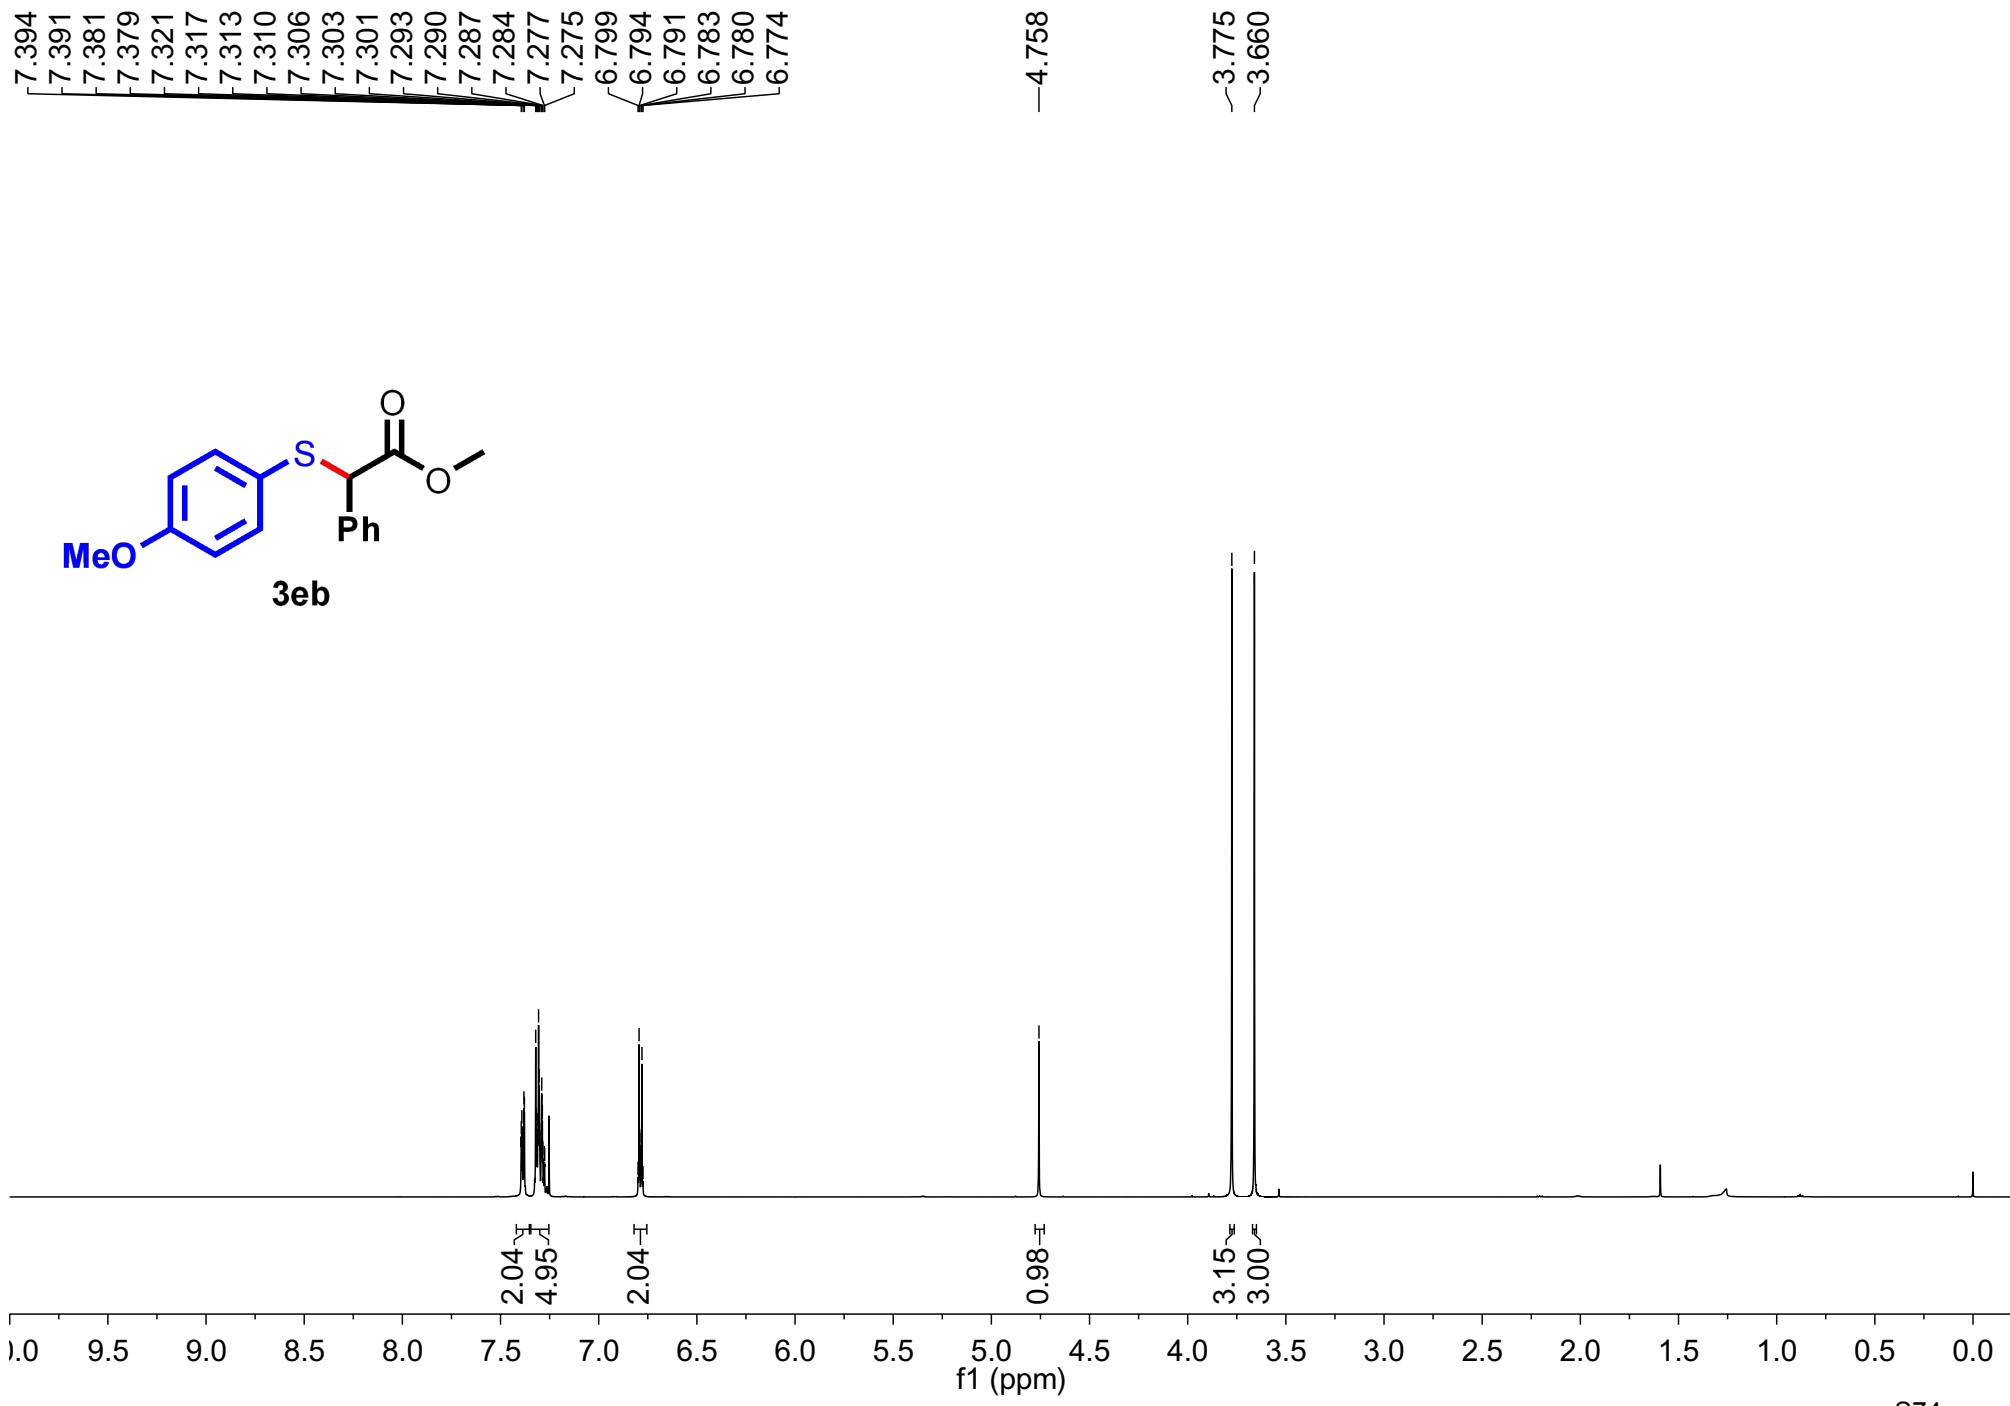

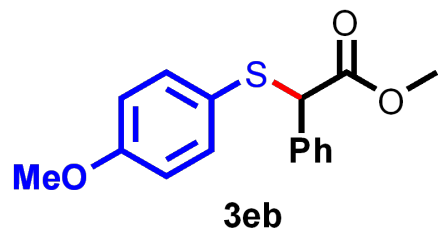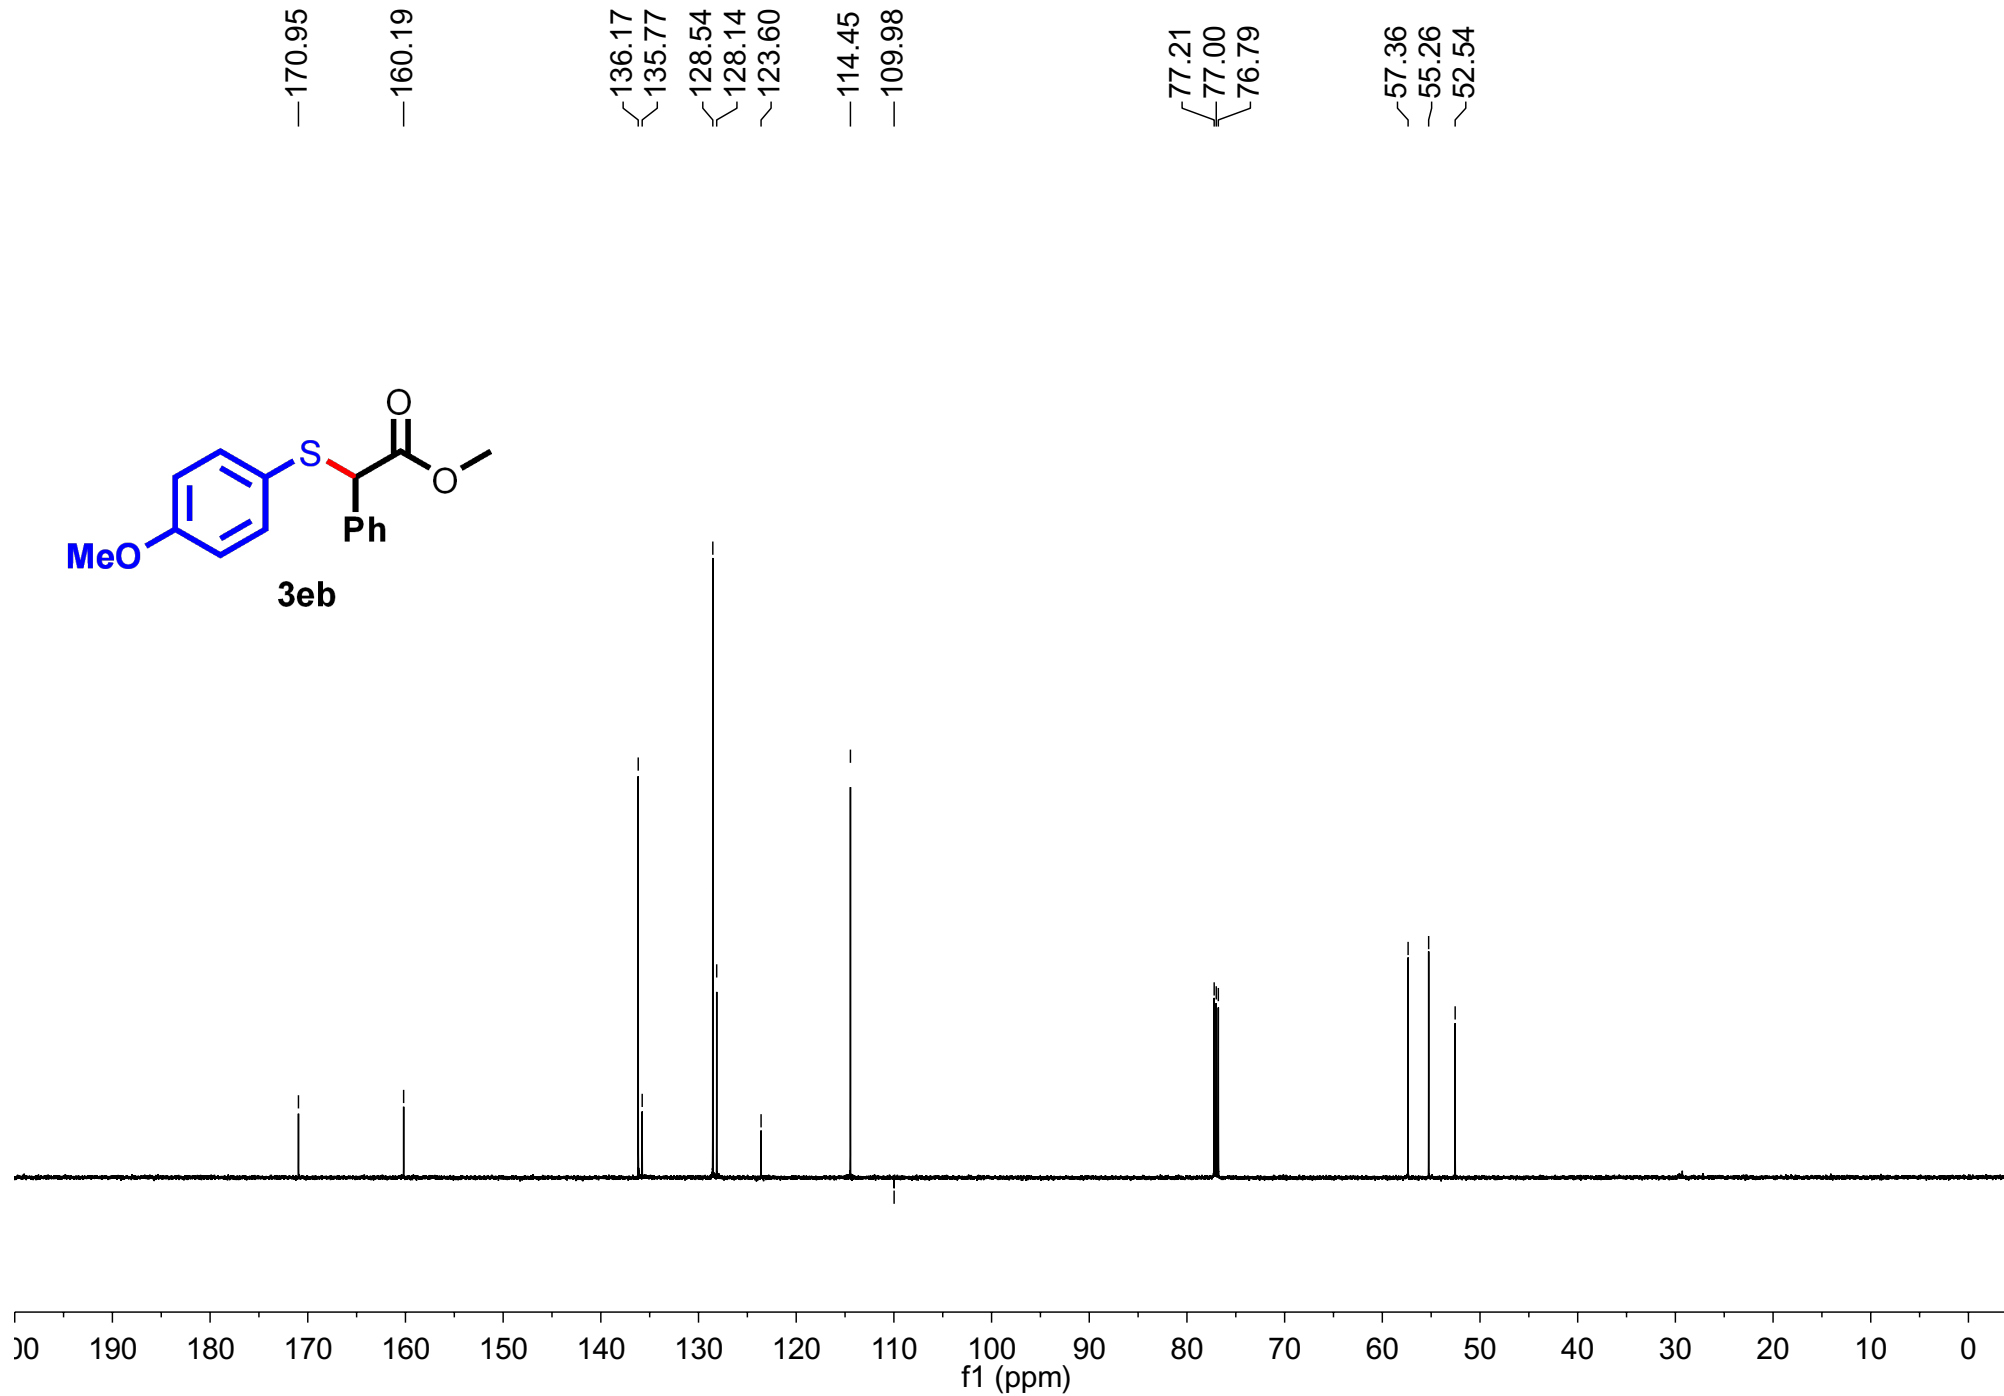

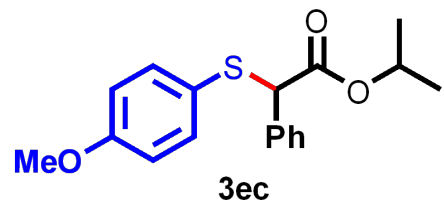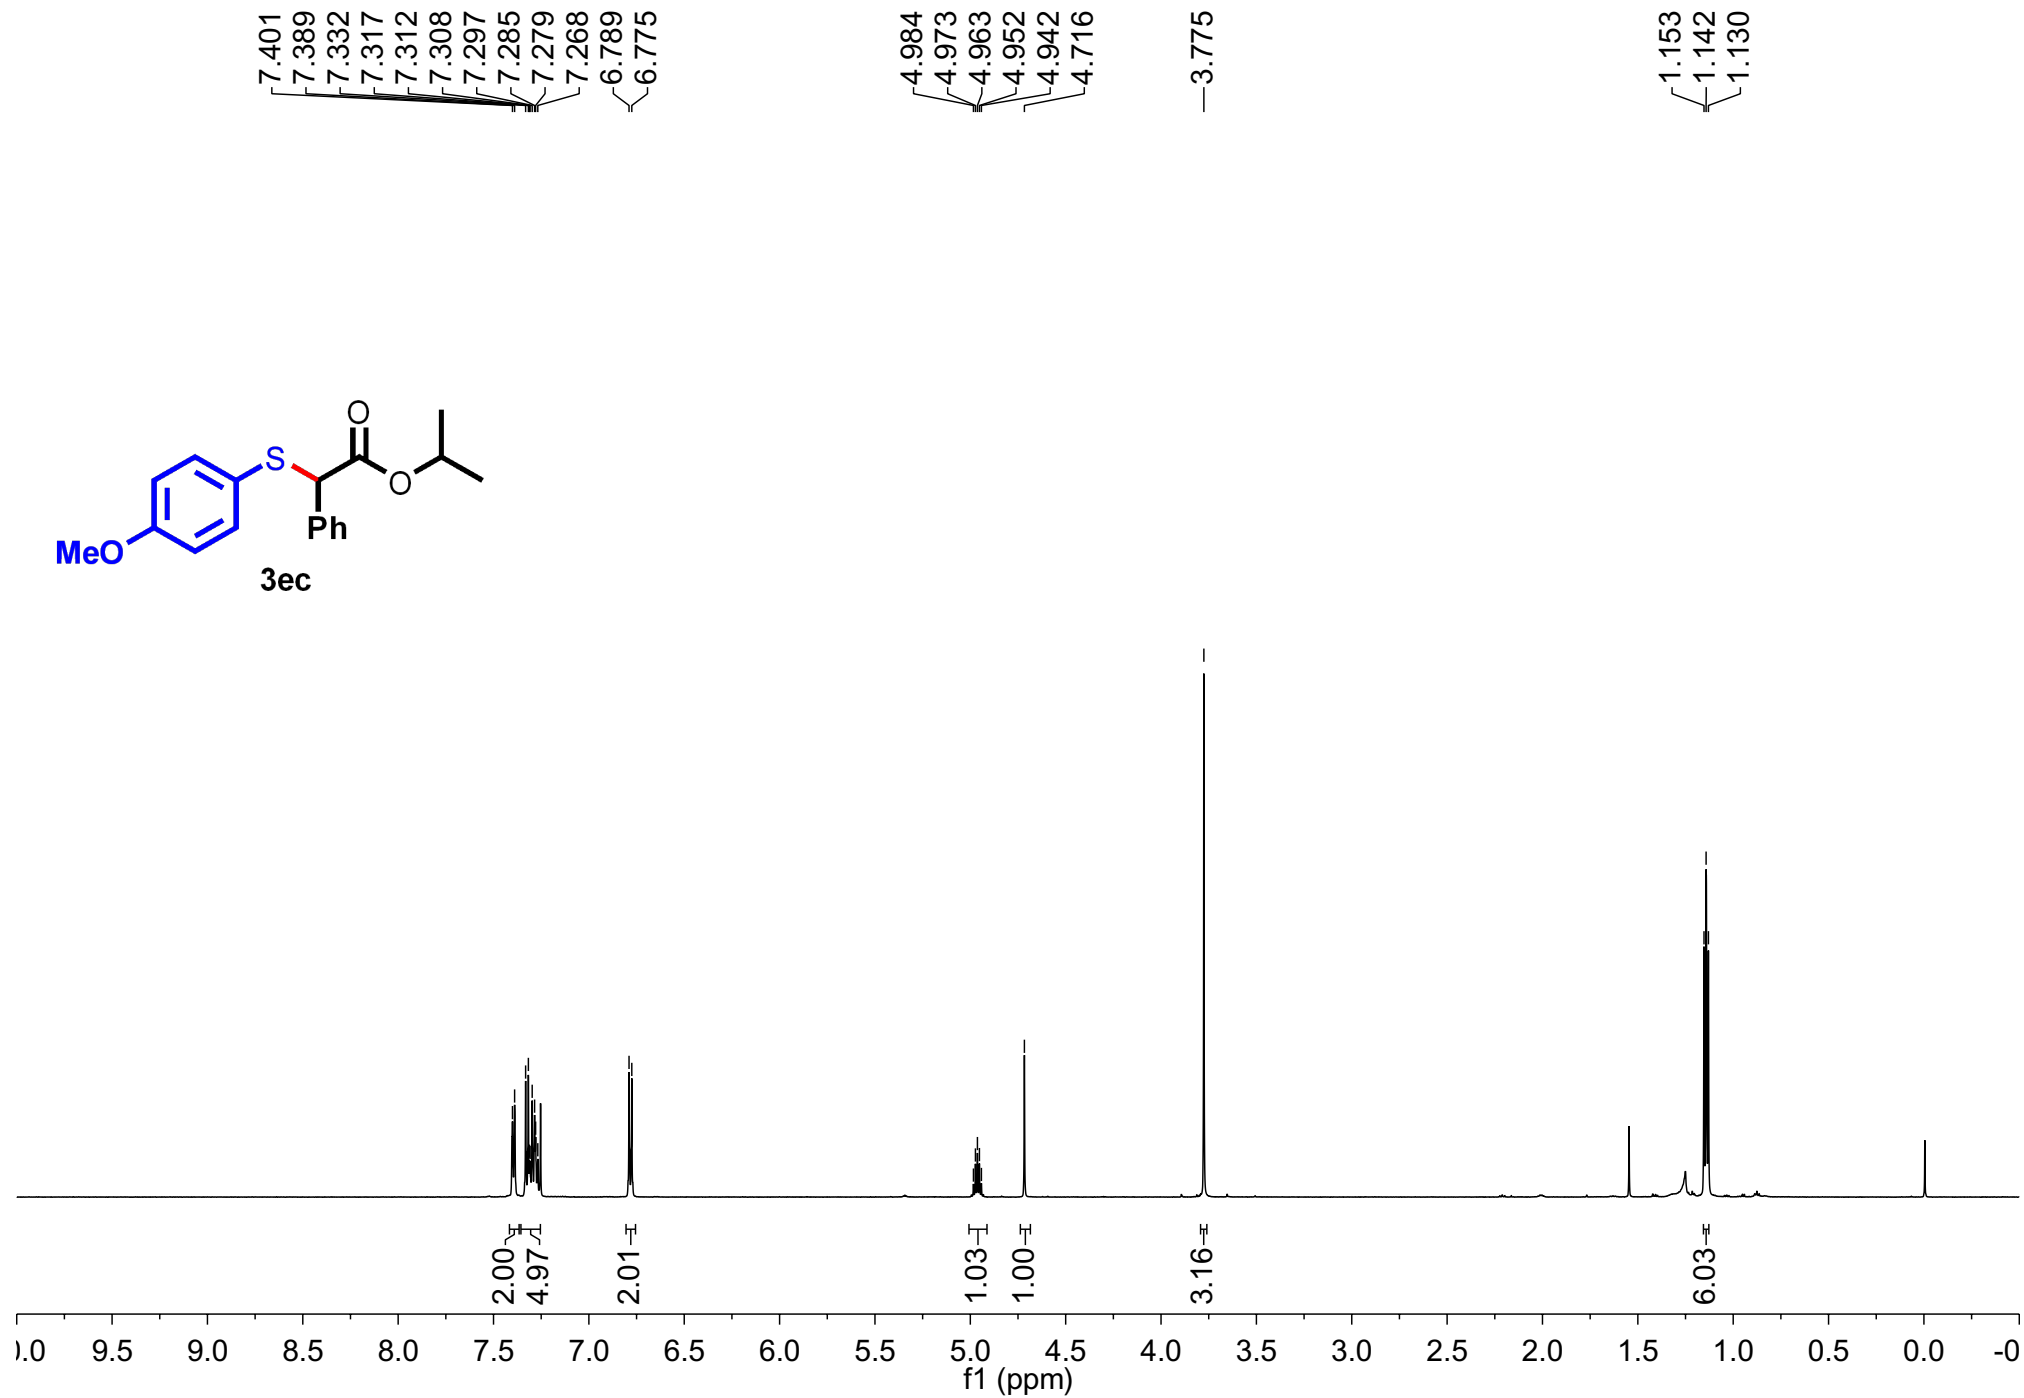



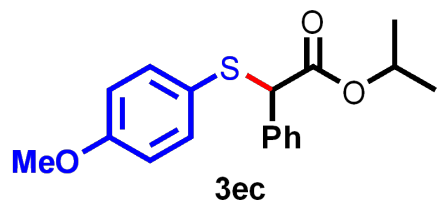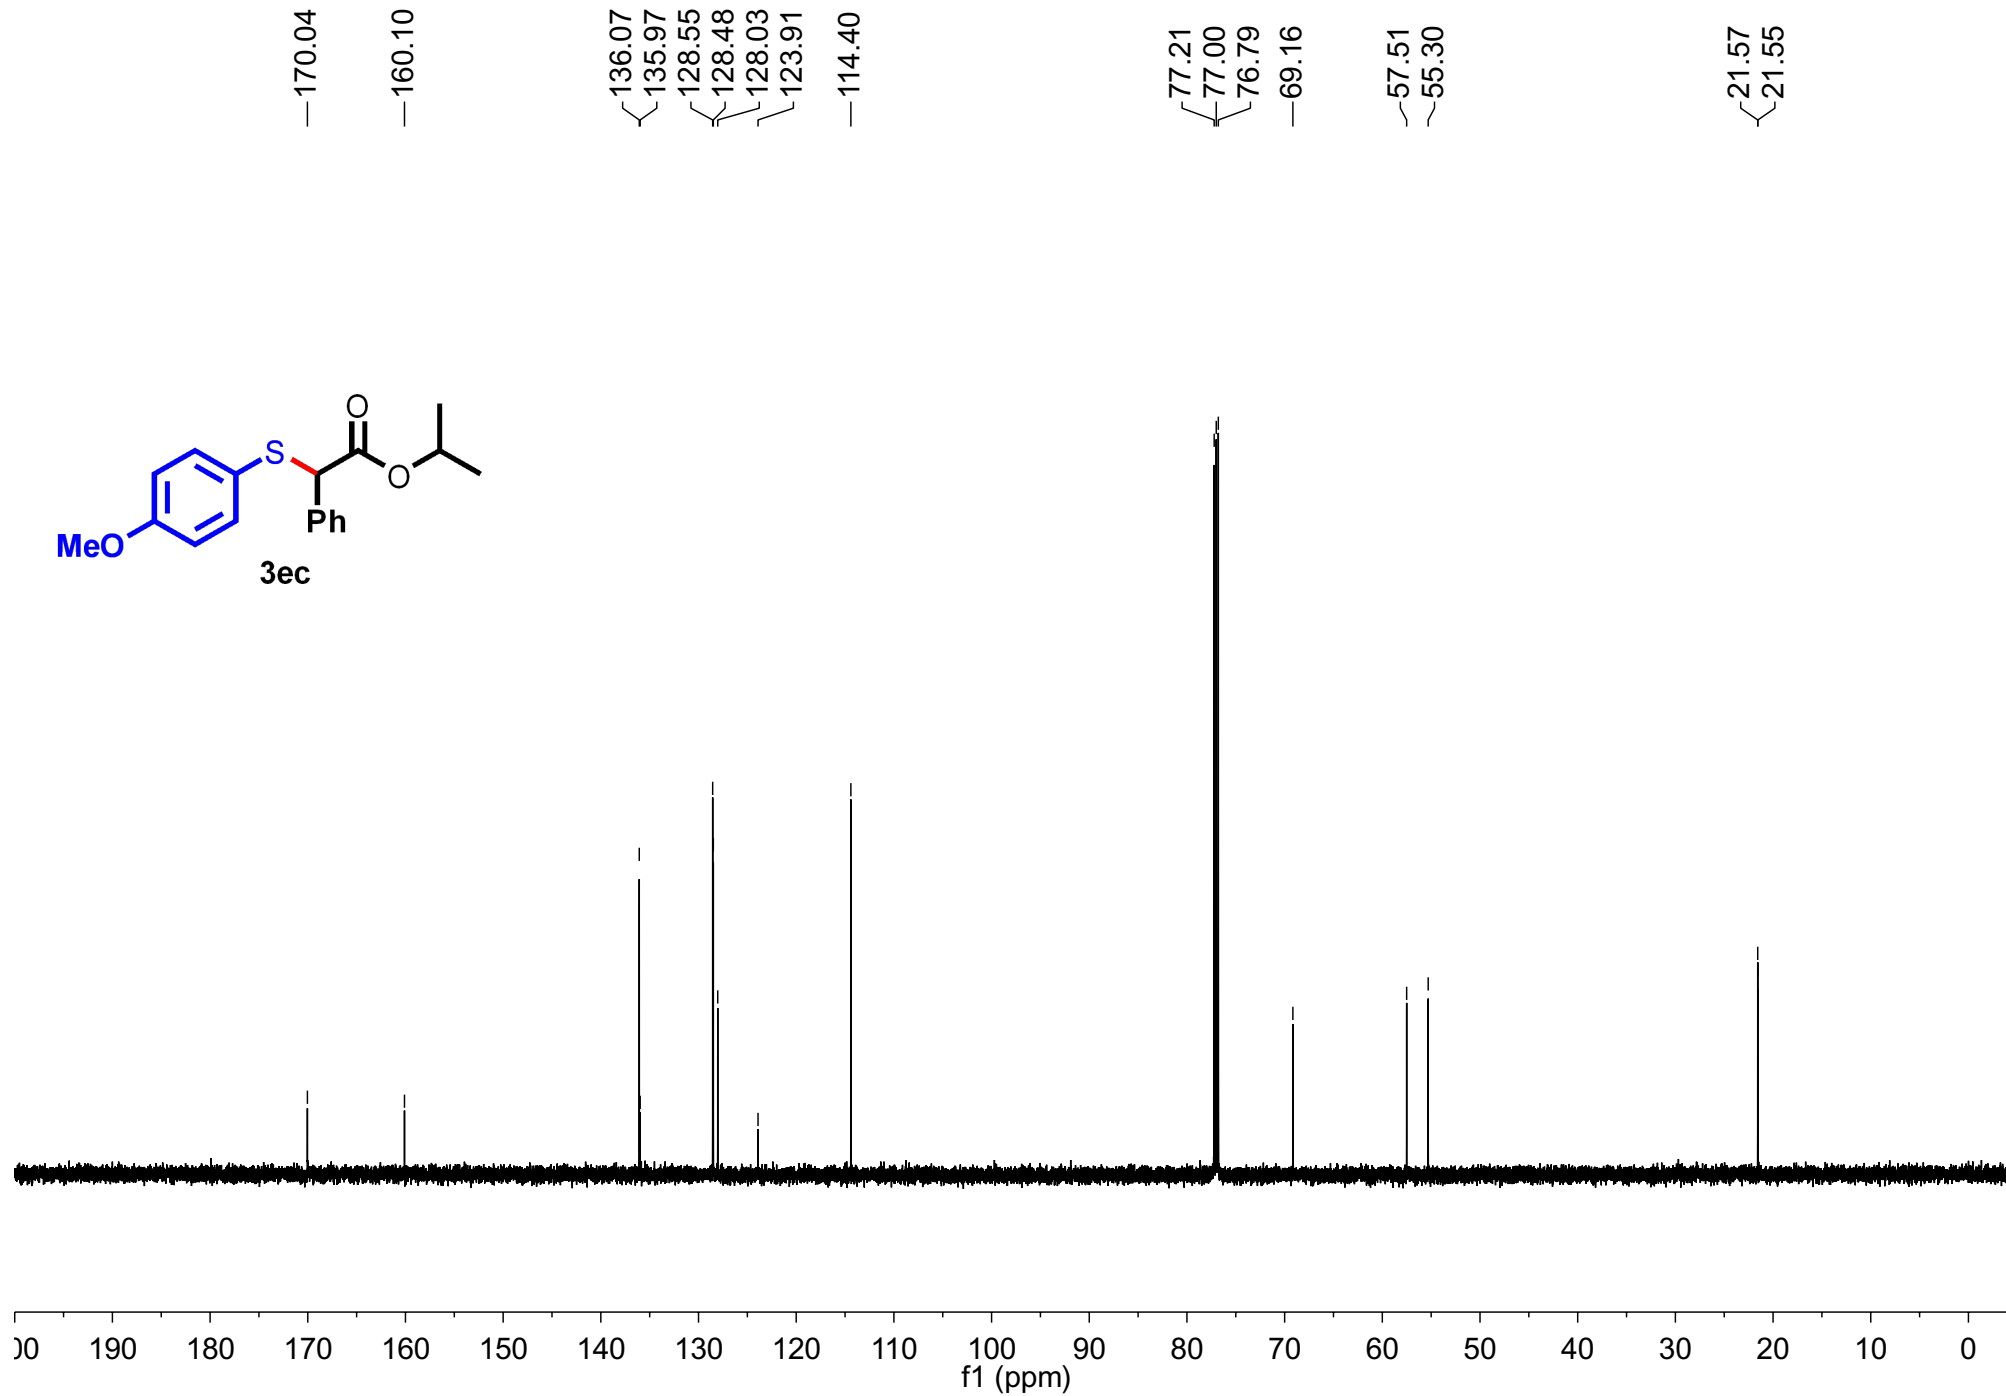

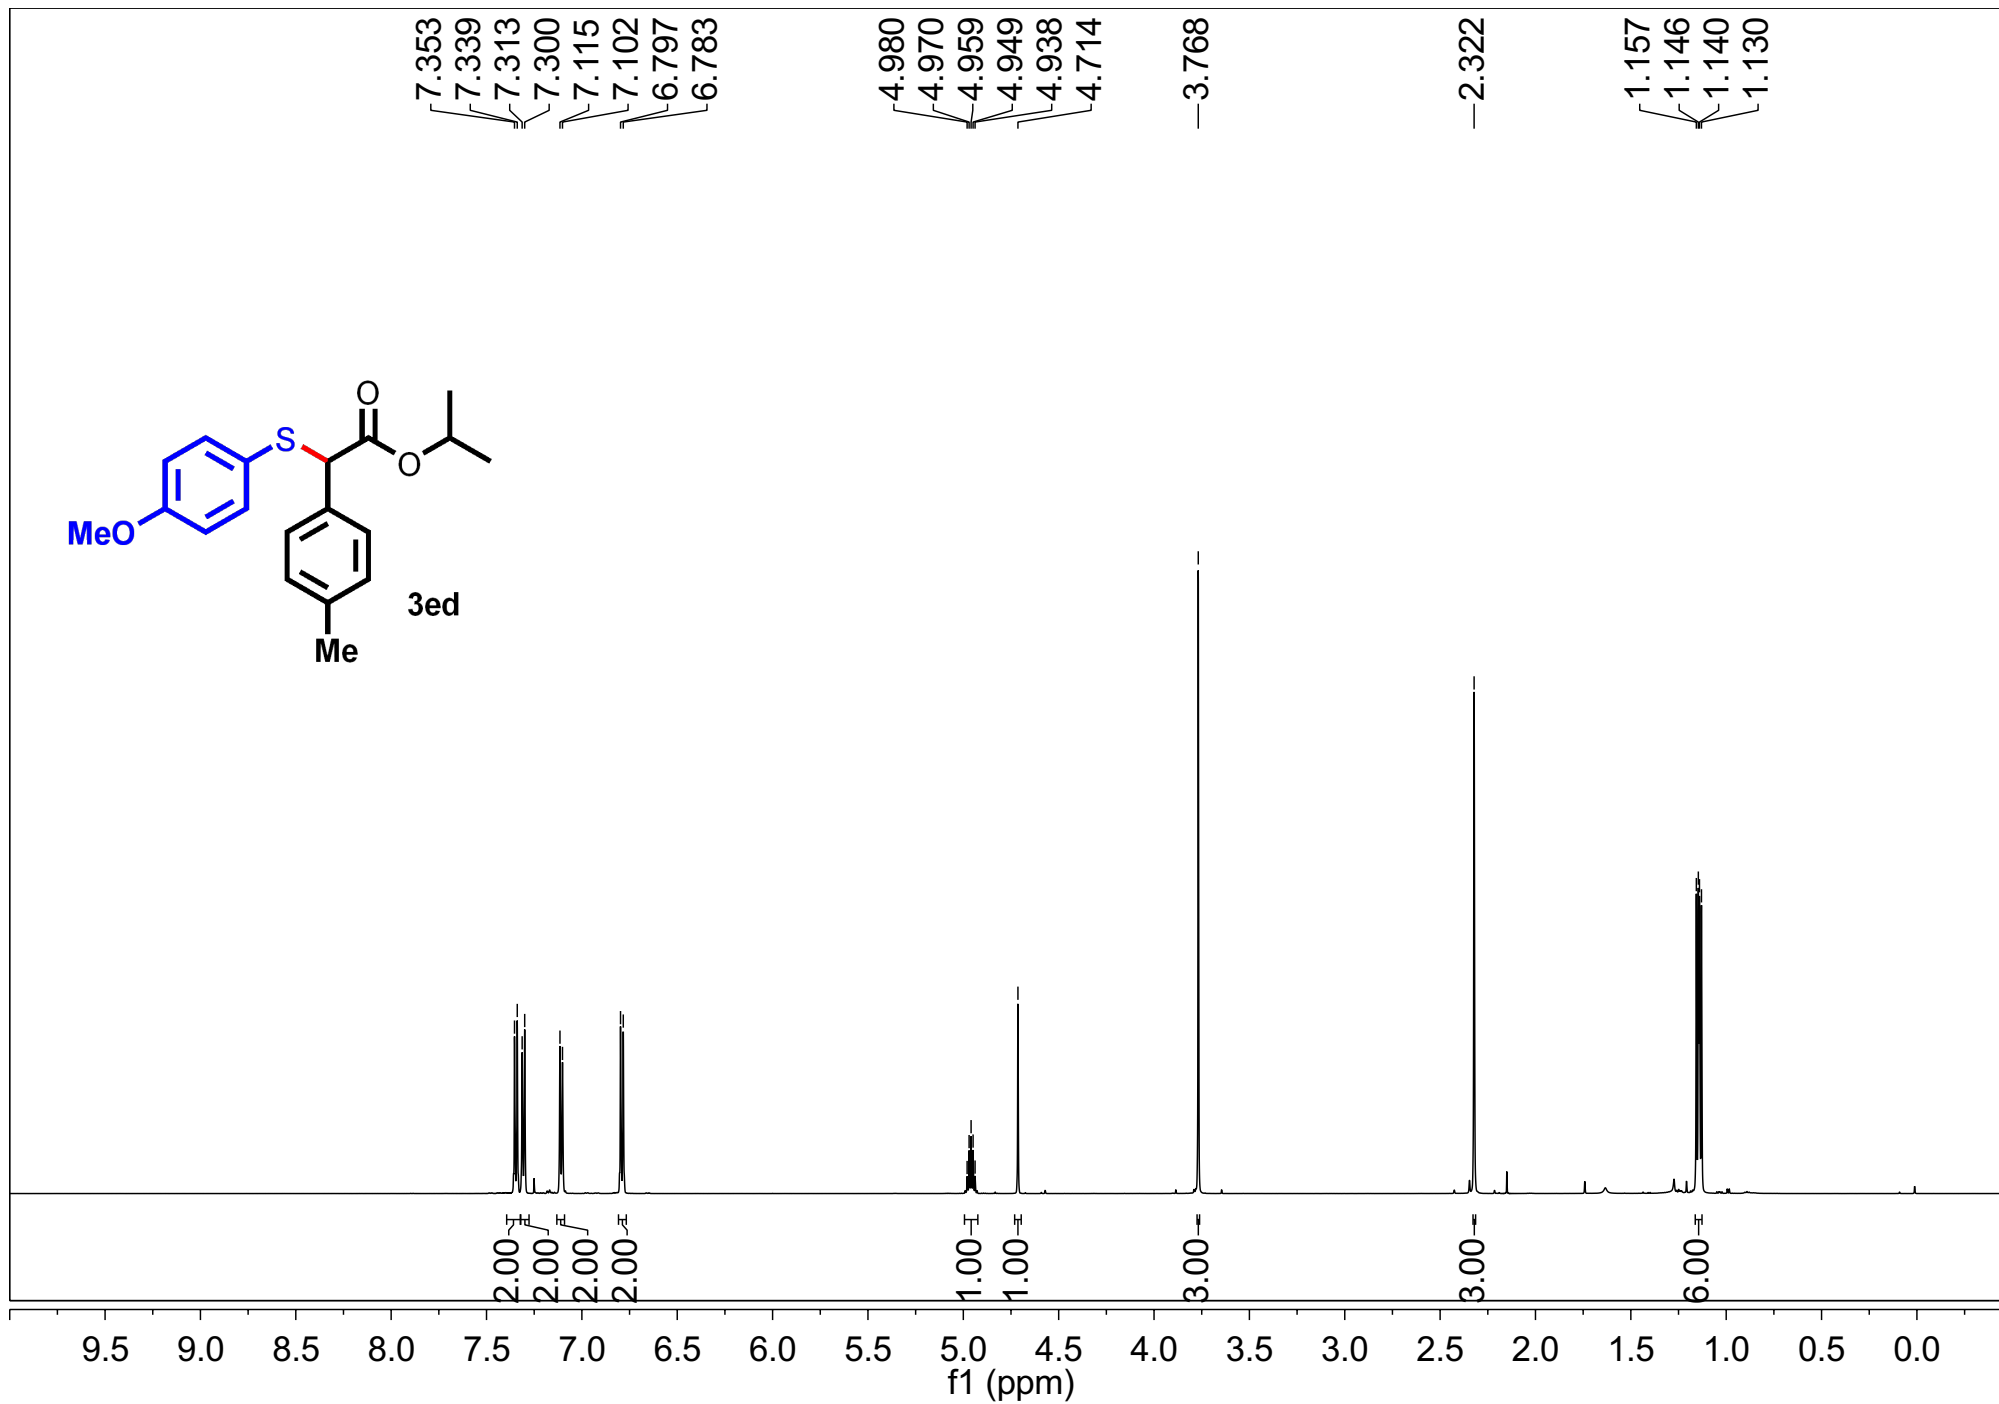

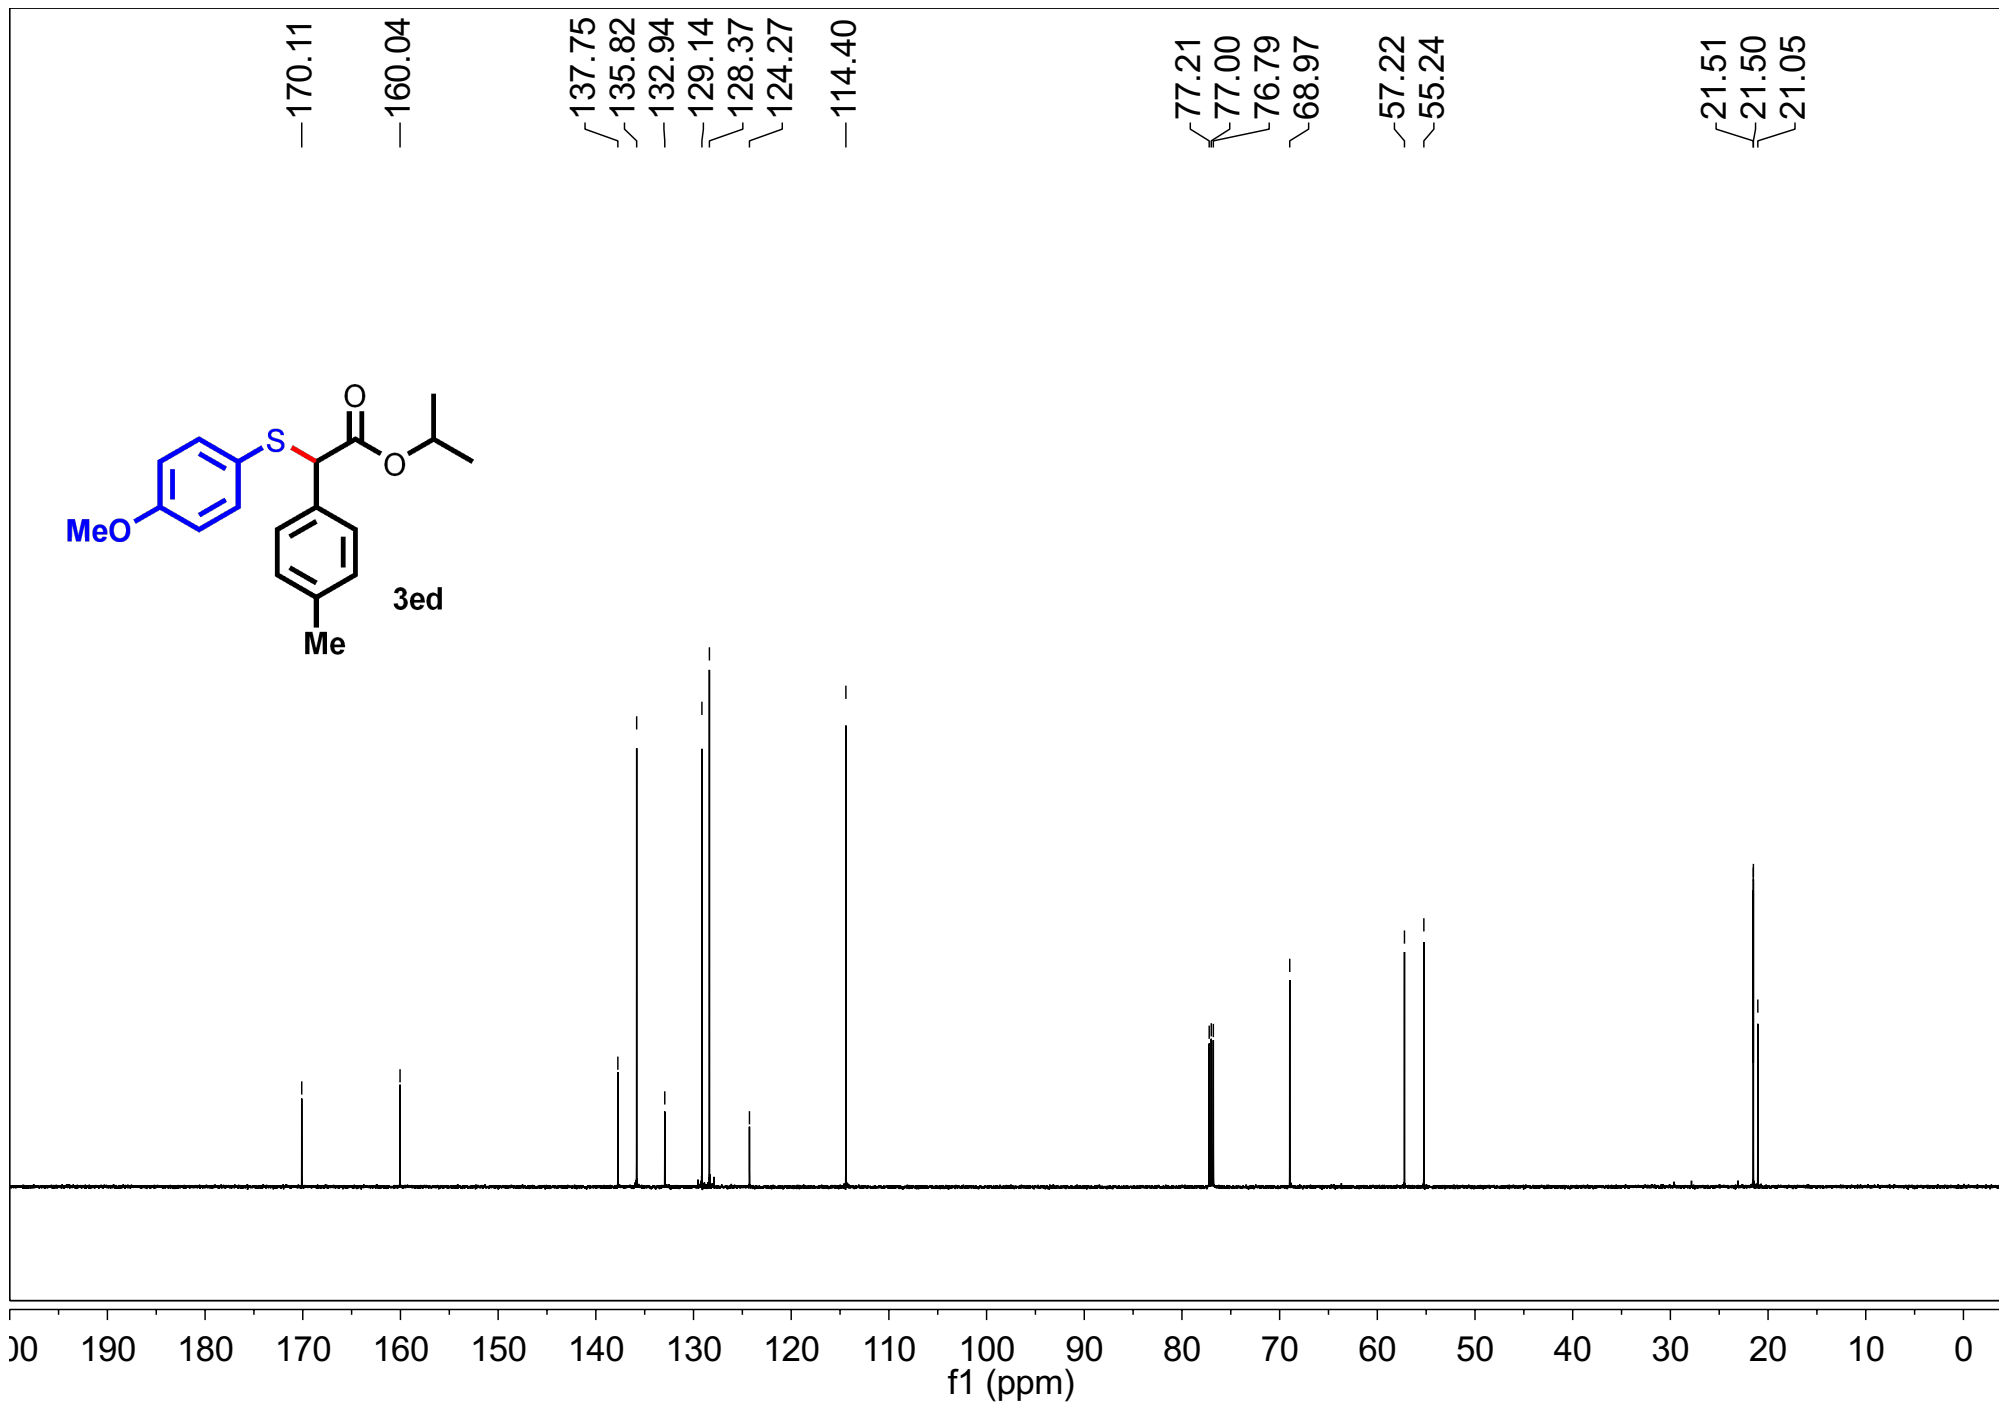

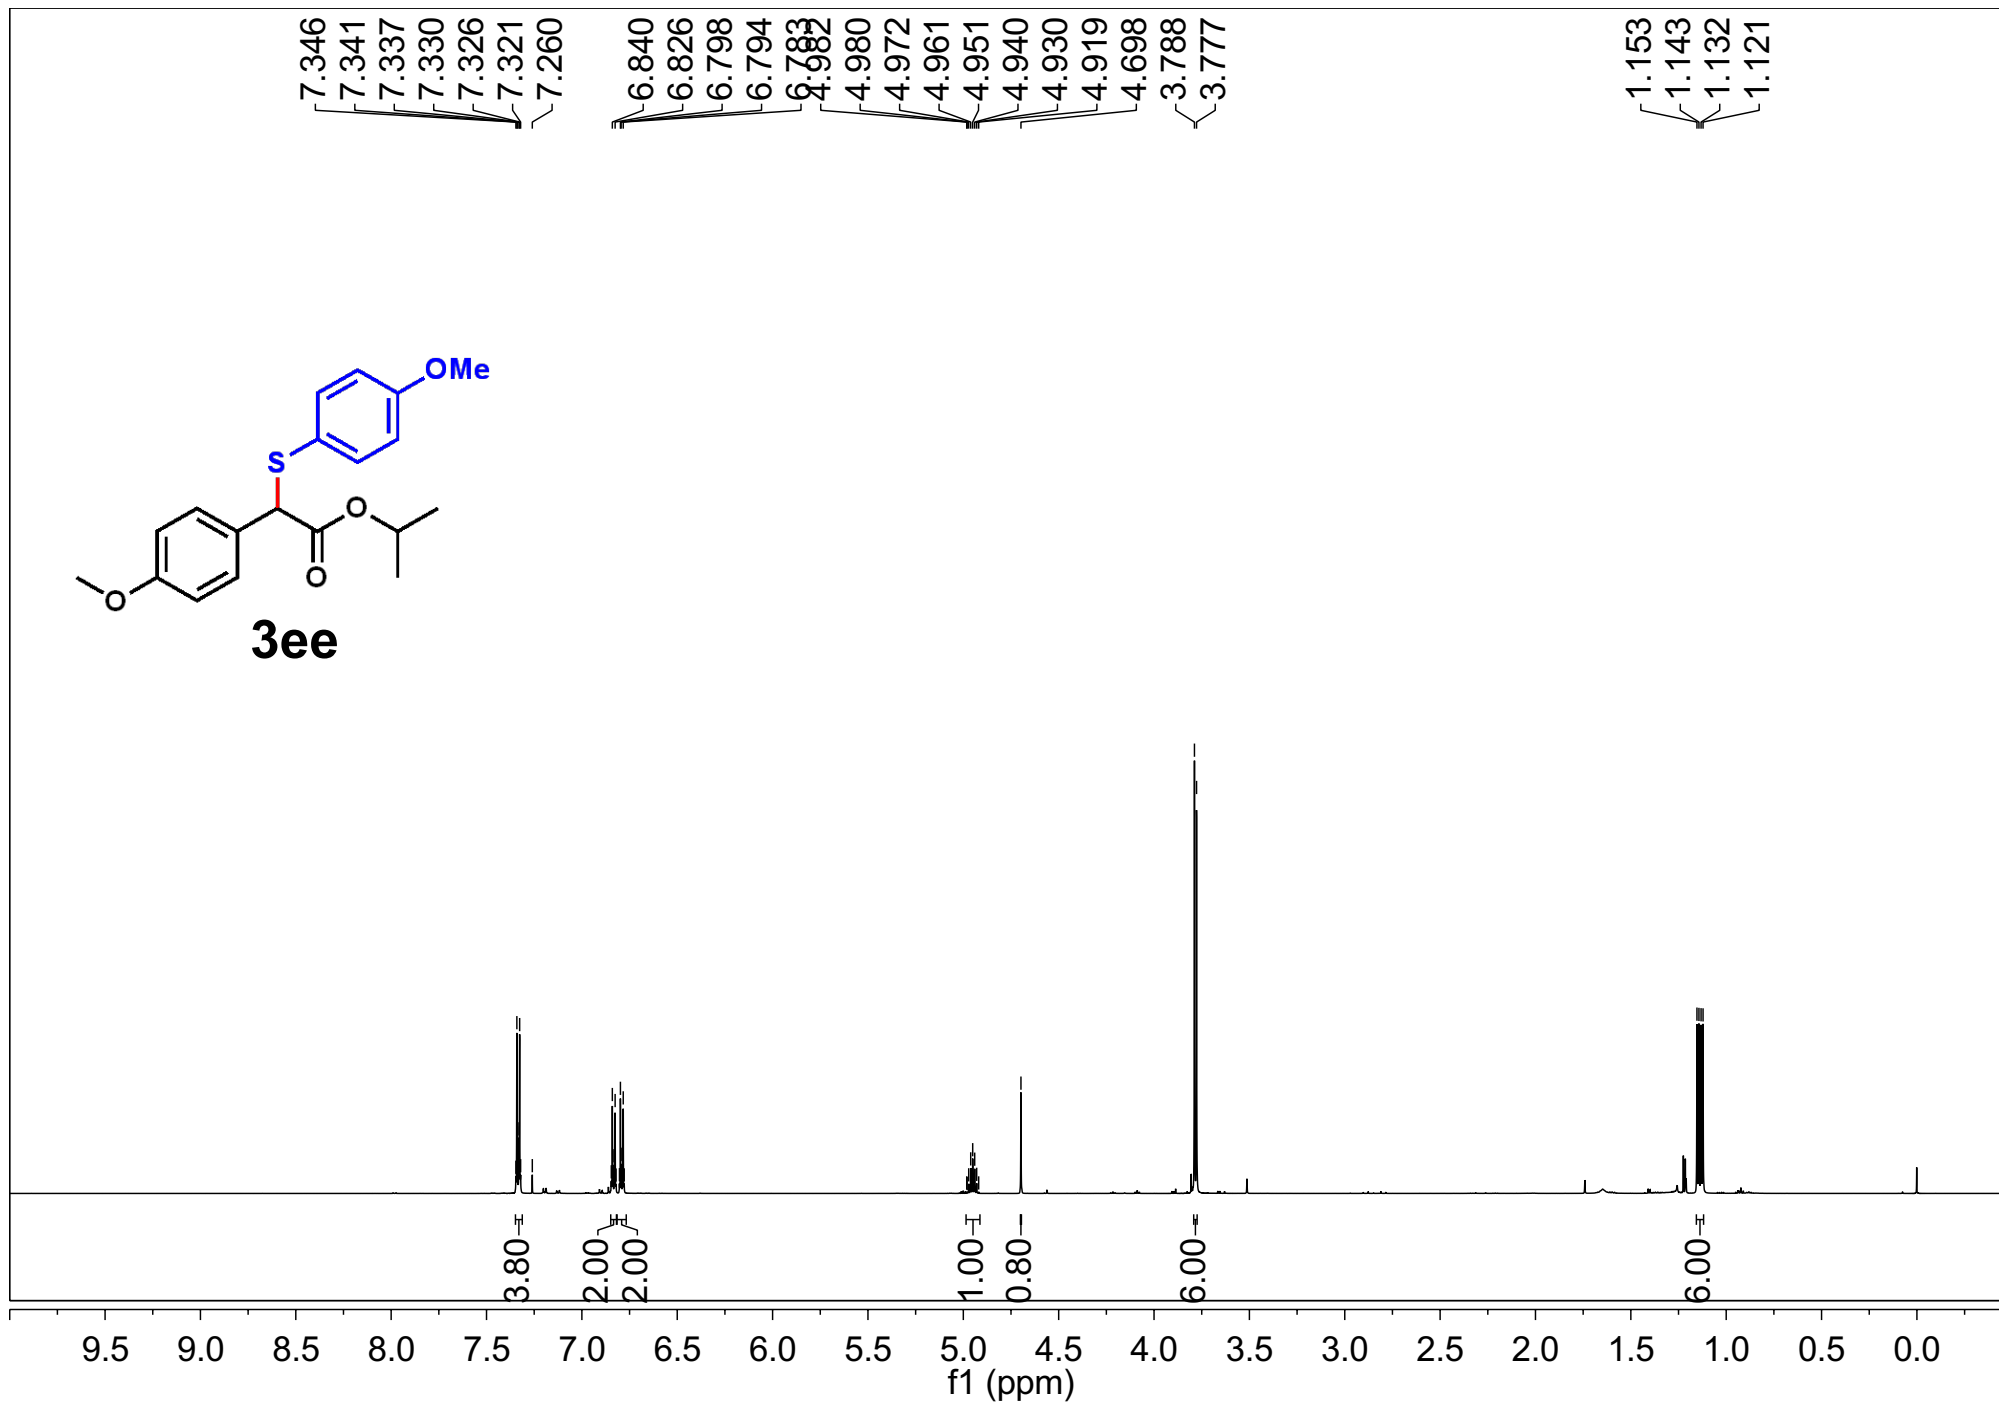

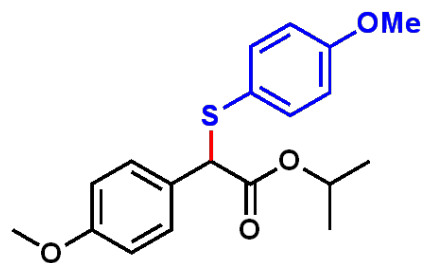

**3ee**

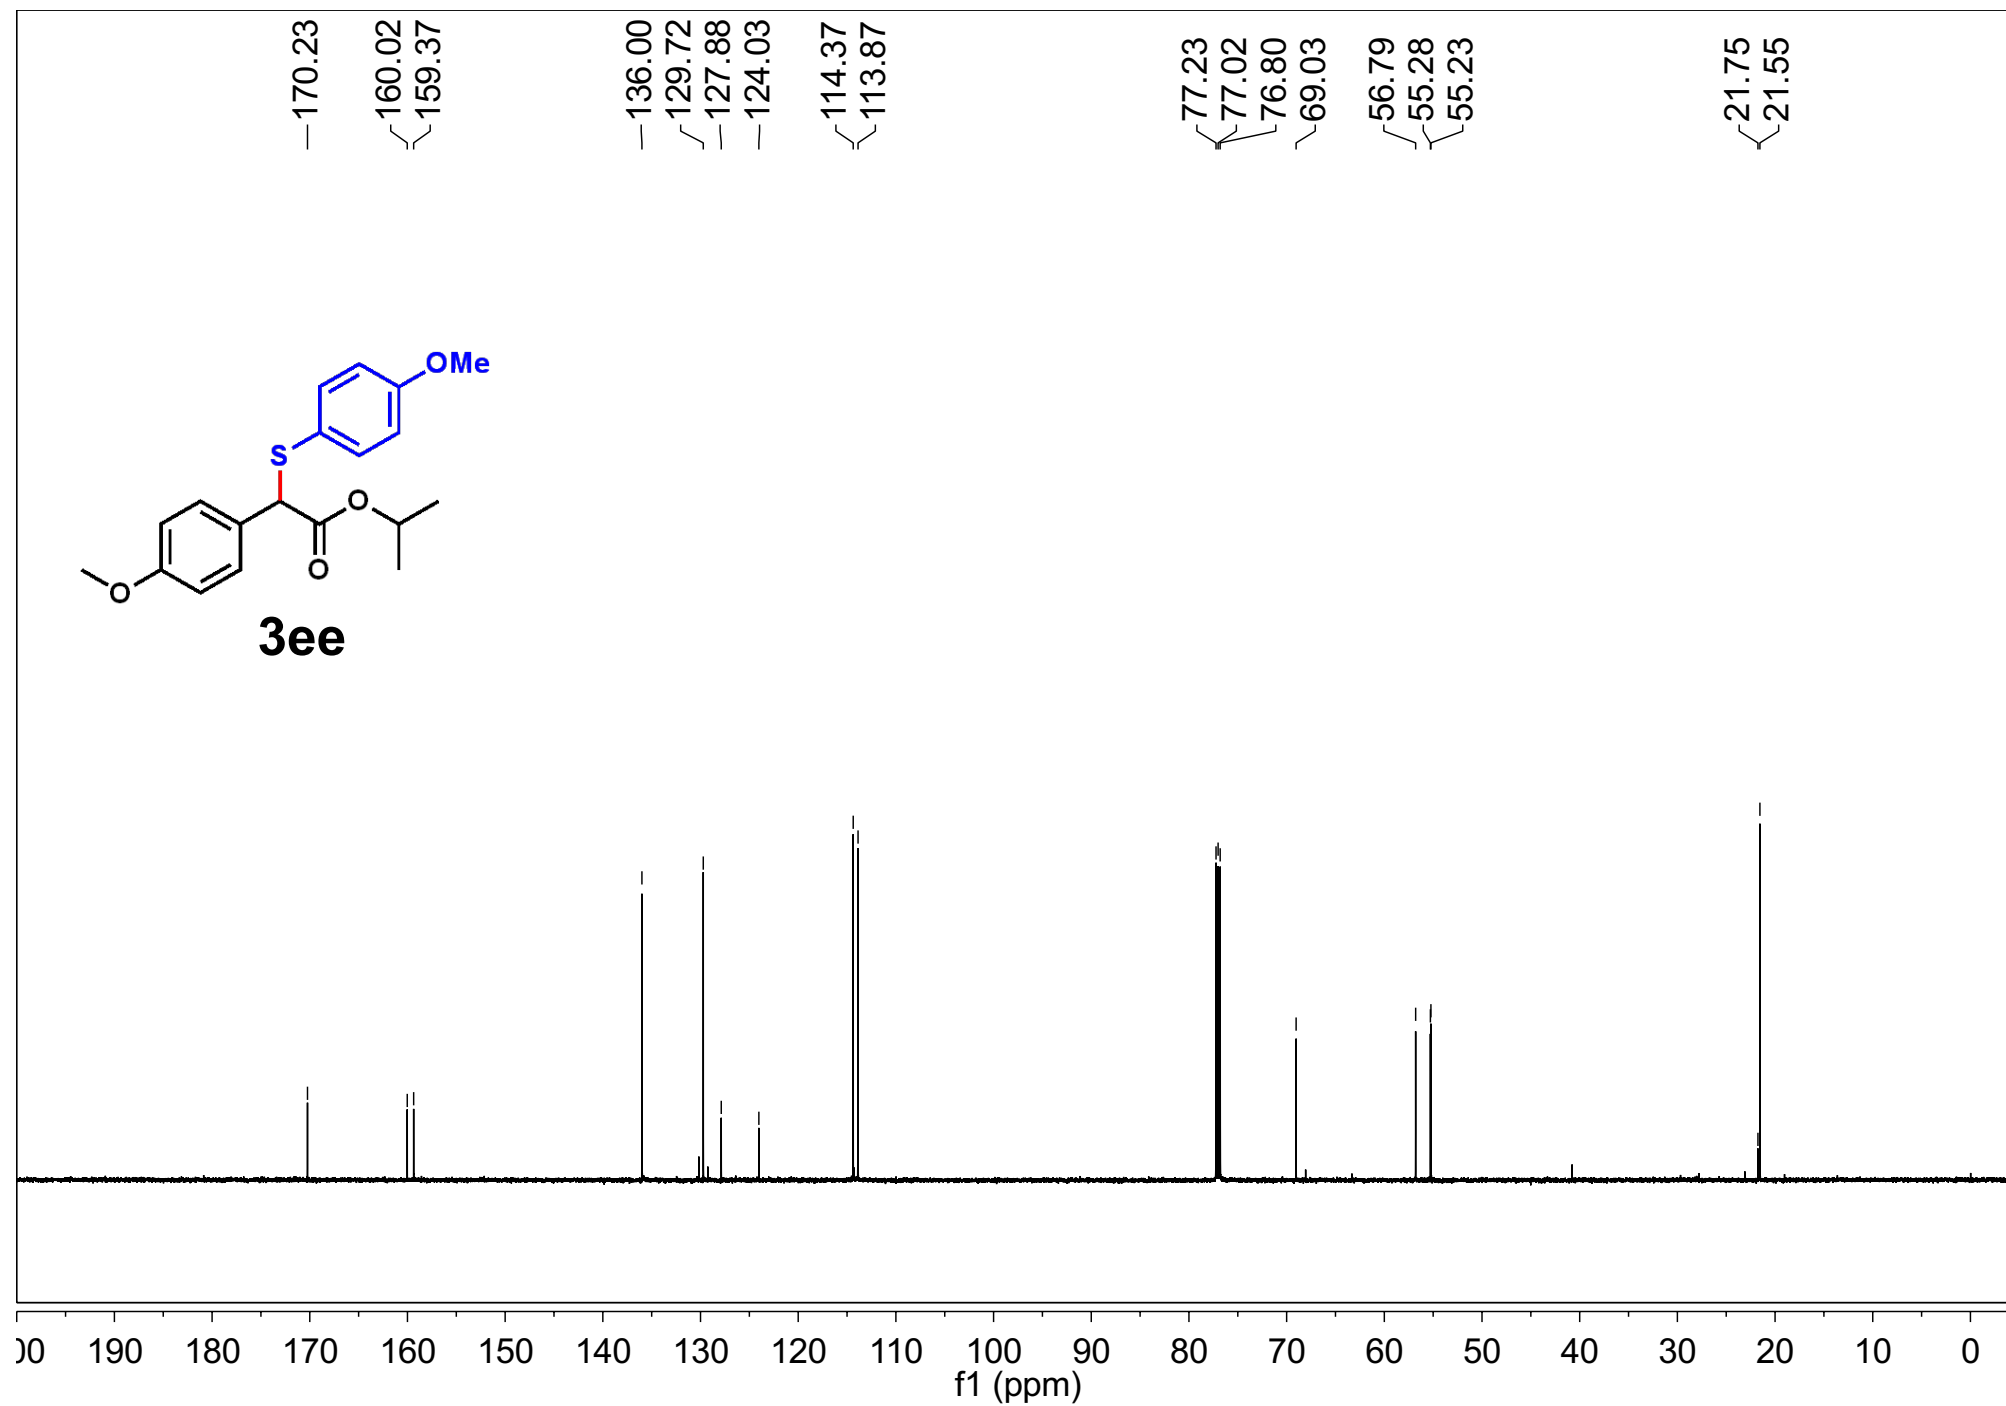

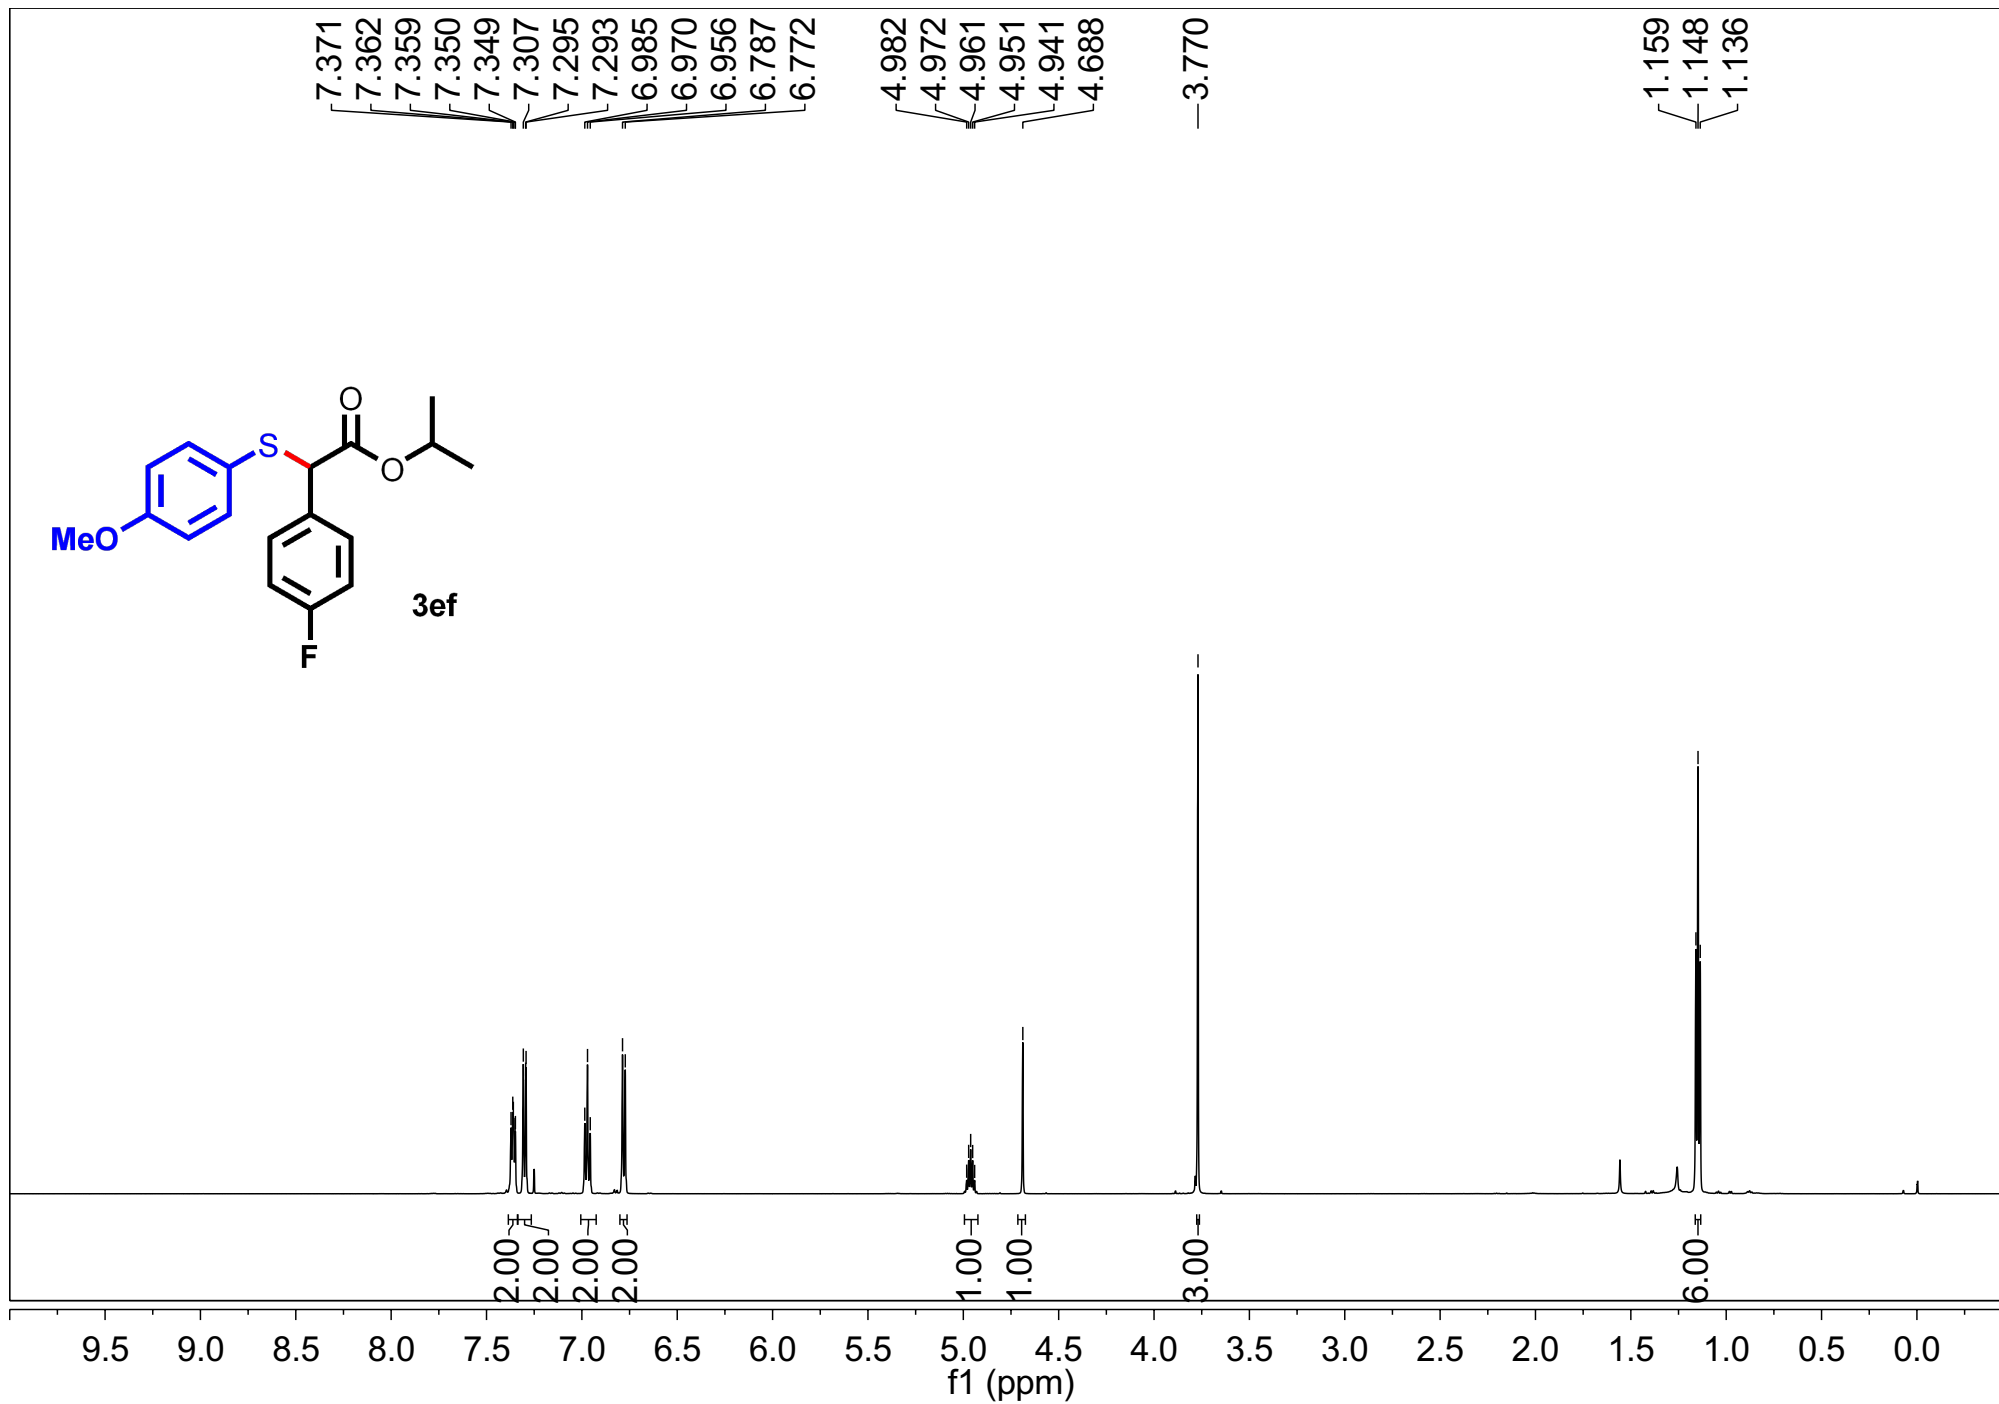

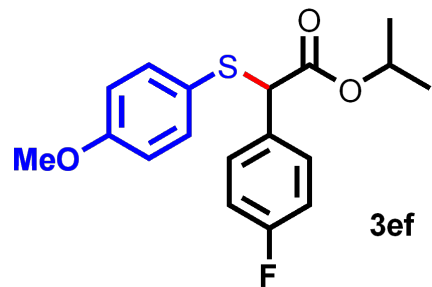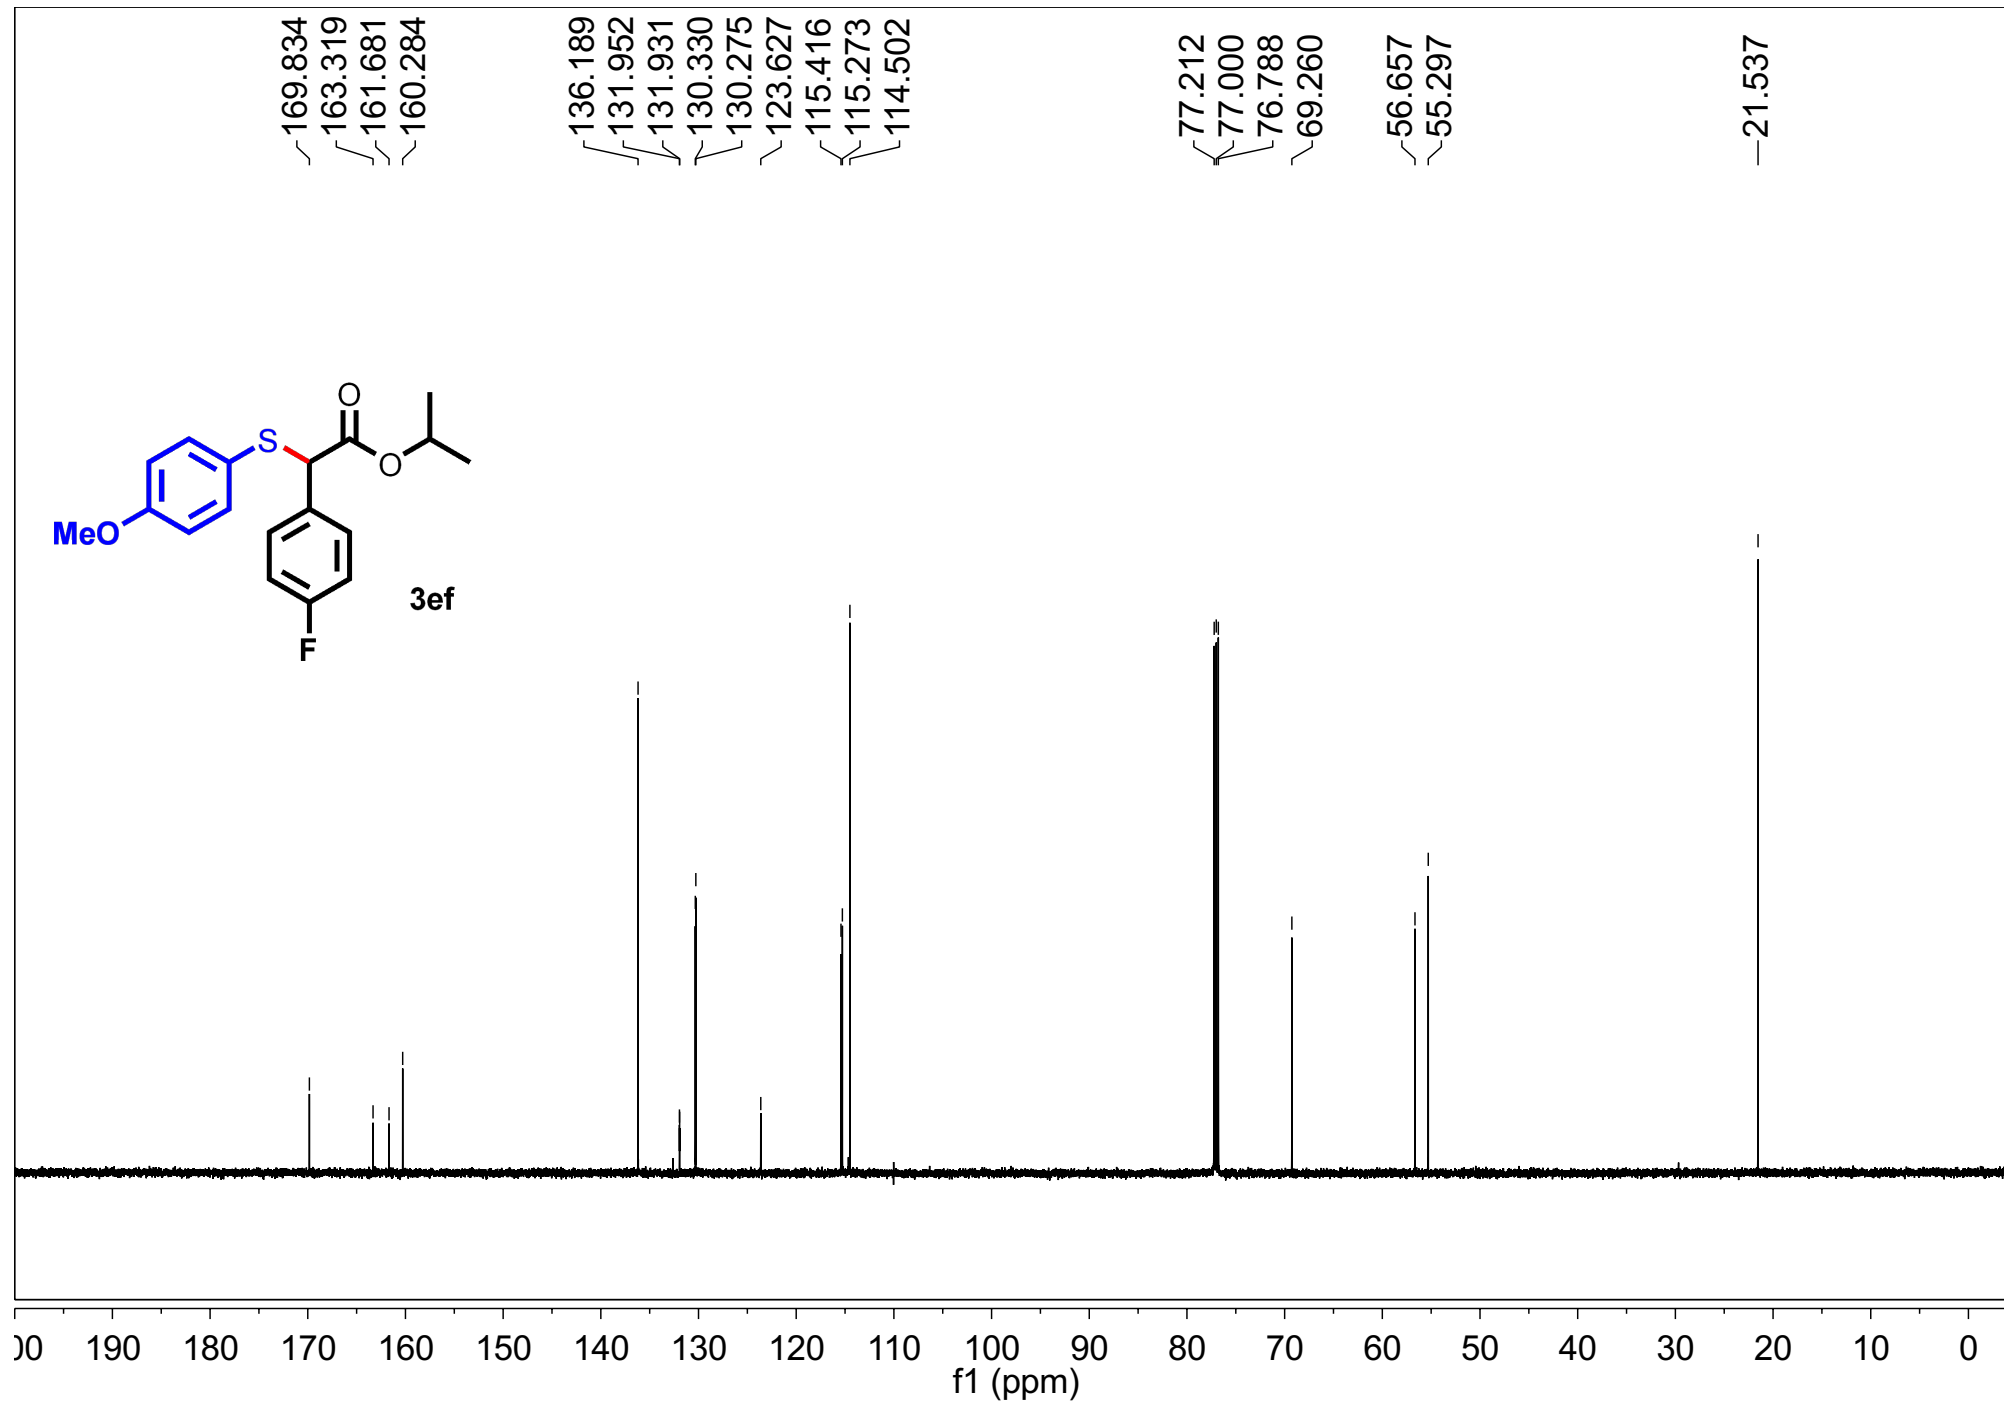

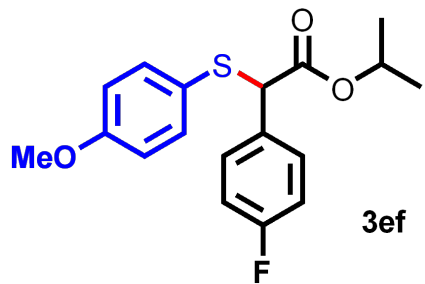

-114.277  
-114.286  
-114.300  
-114.314

5 -65 -75 -85 -95 -105 -115 -125 -135 -145 -155 -165  
f1 (ppm)



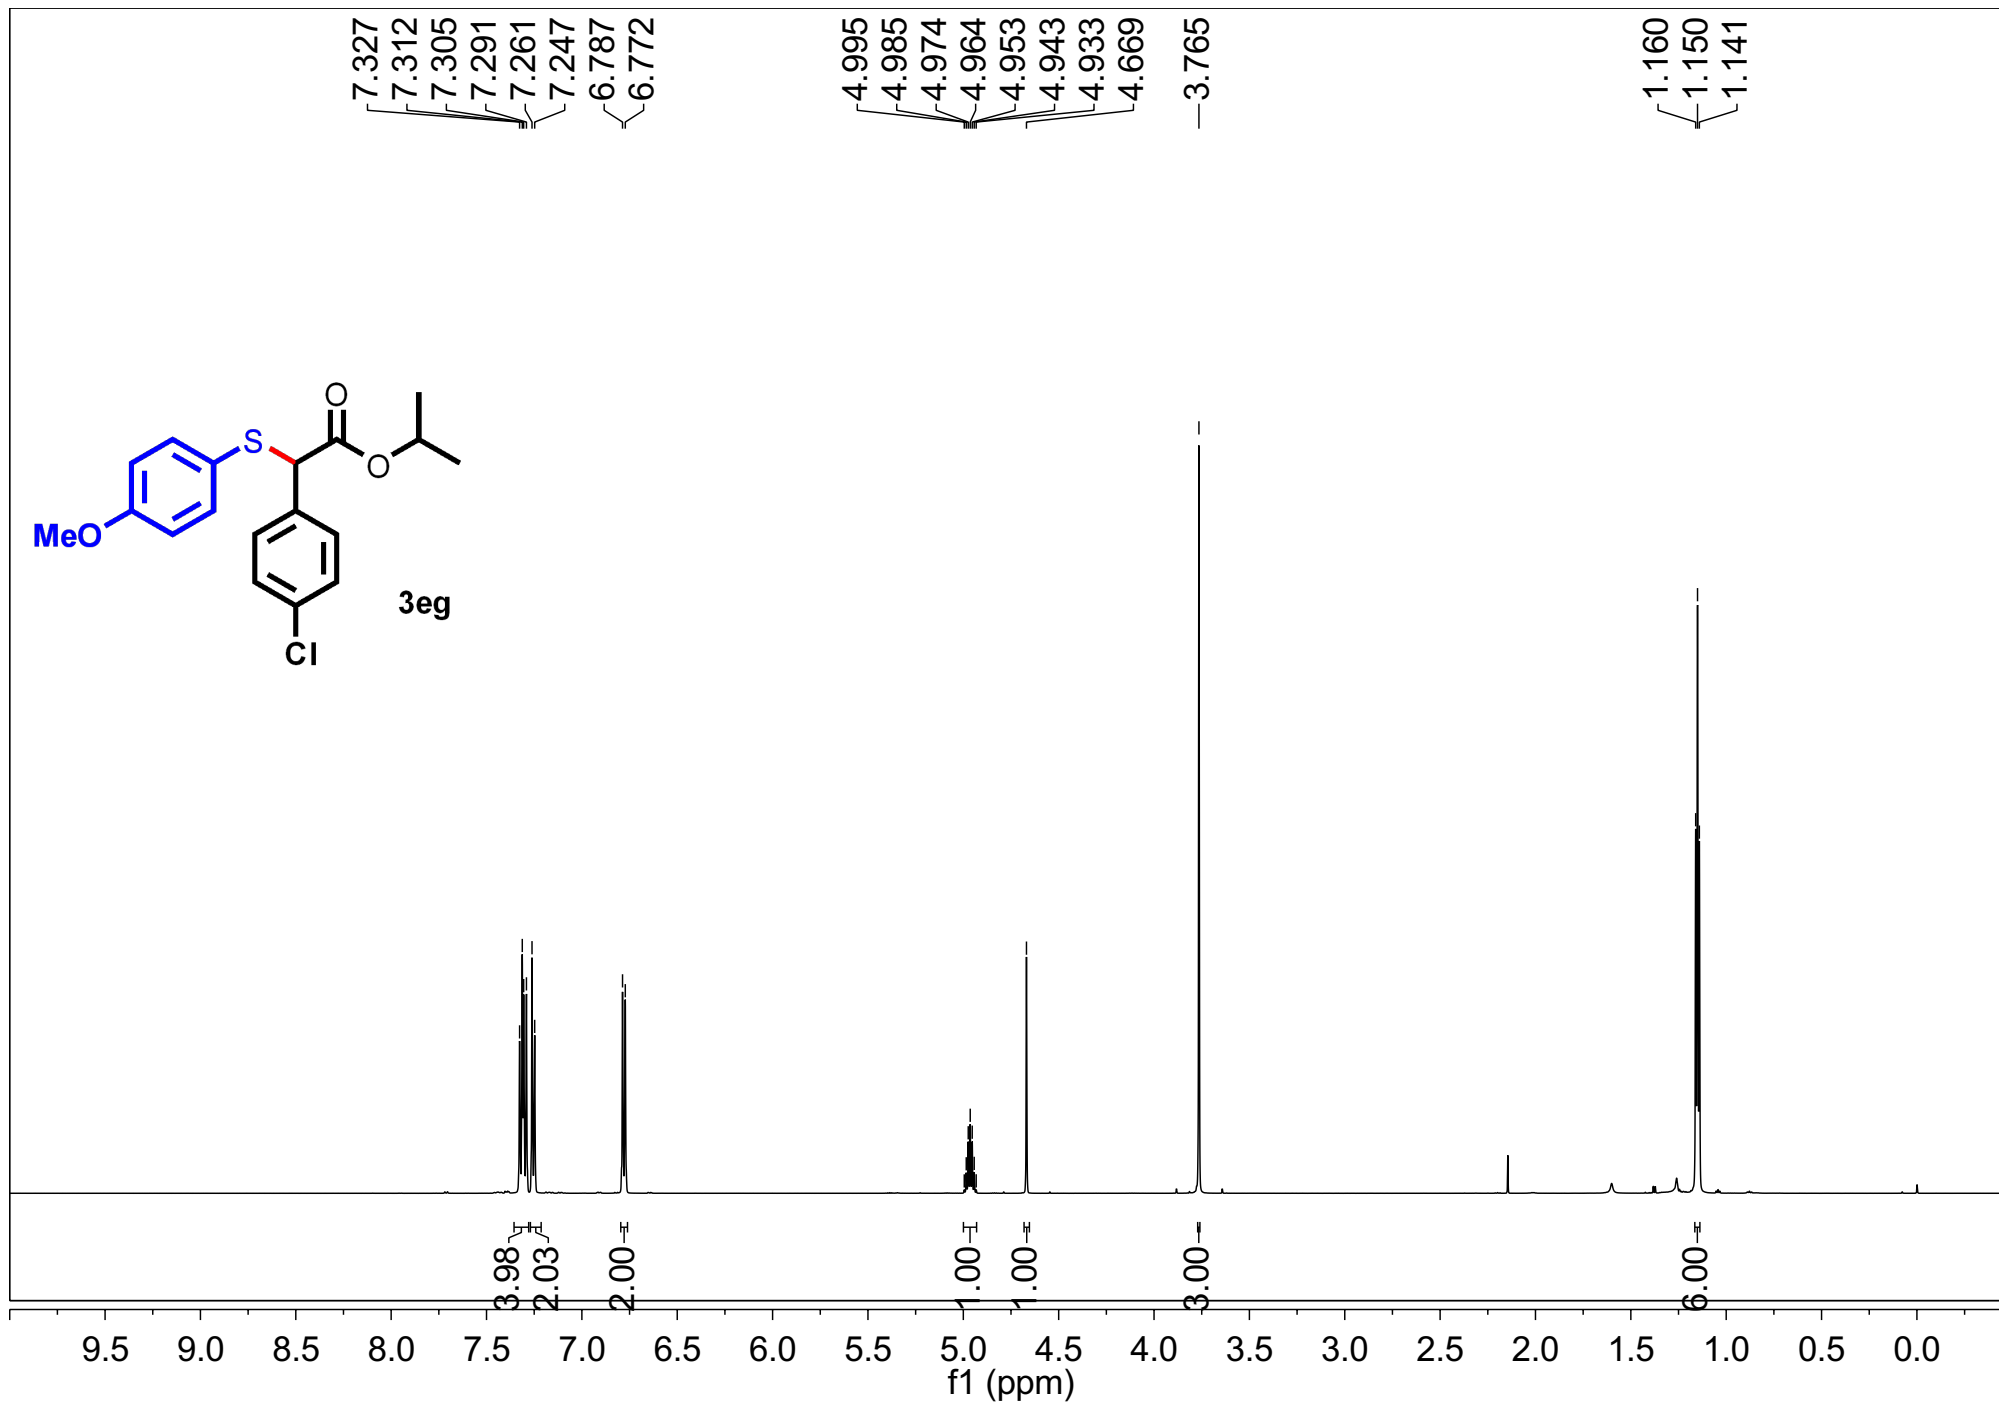

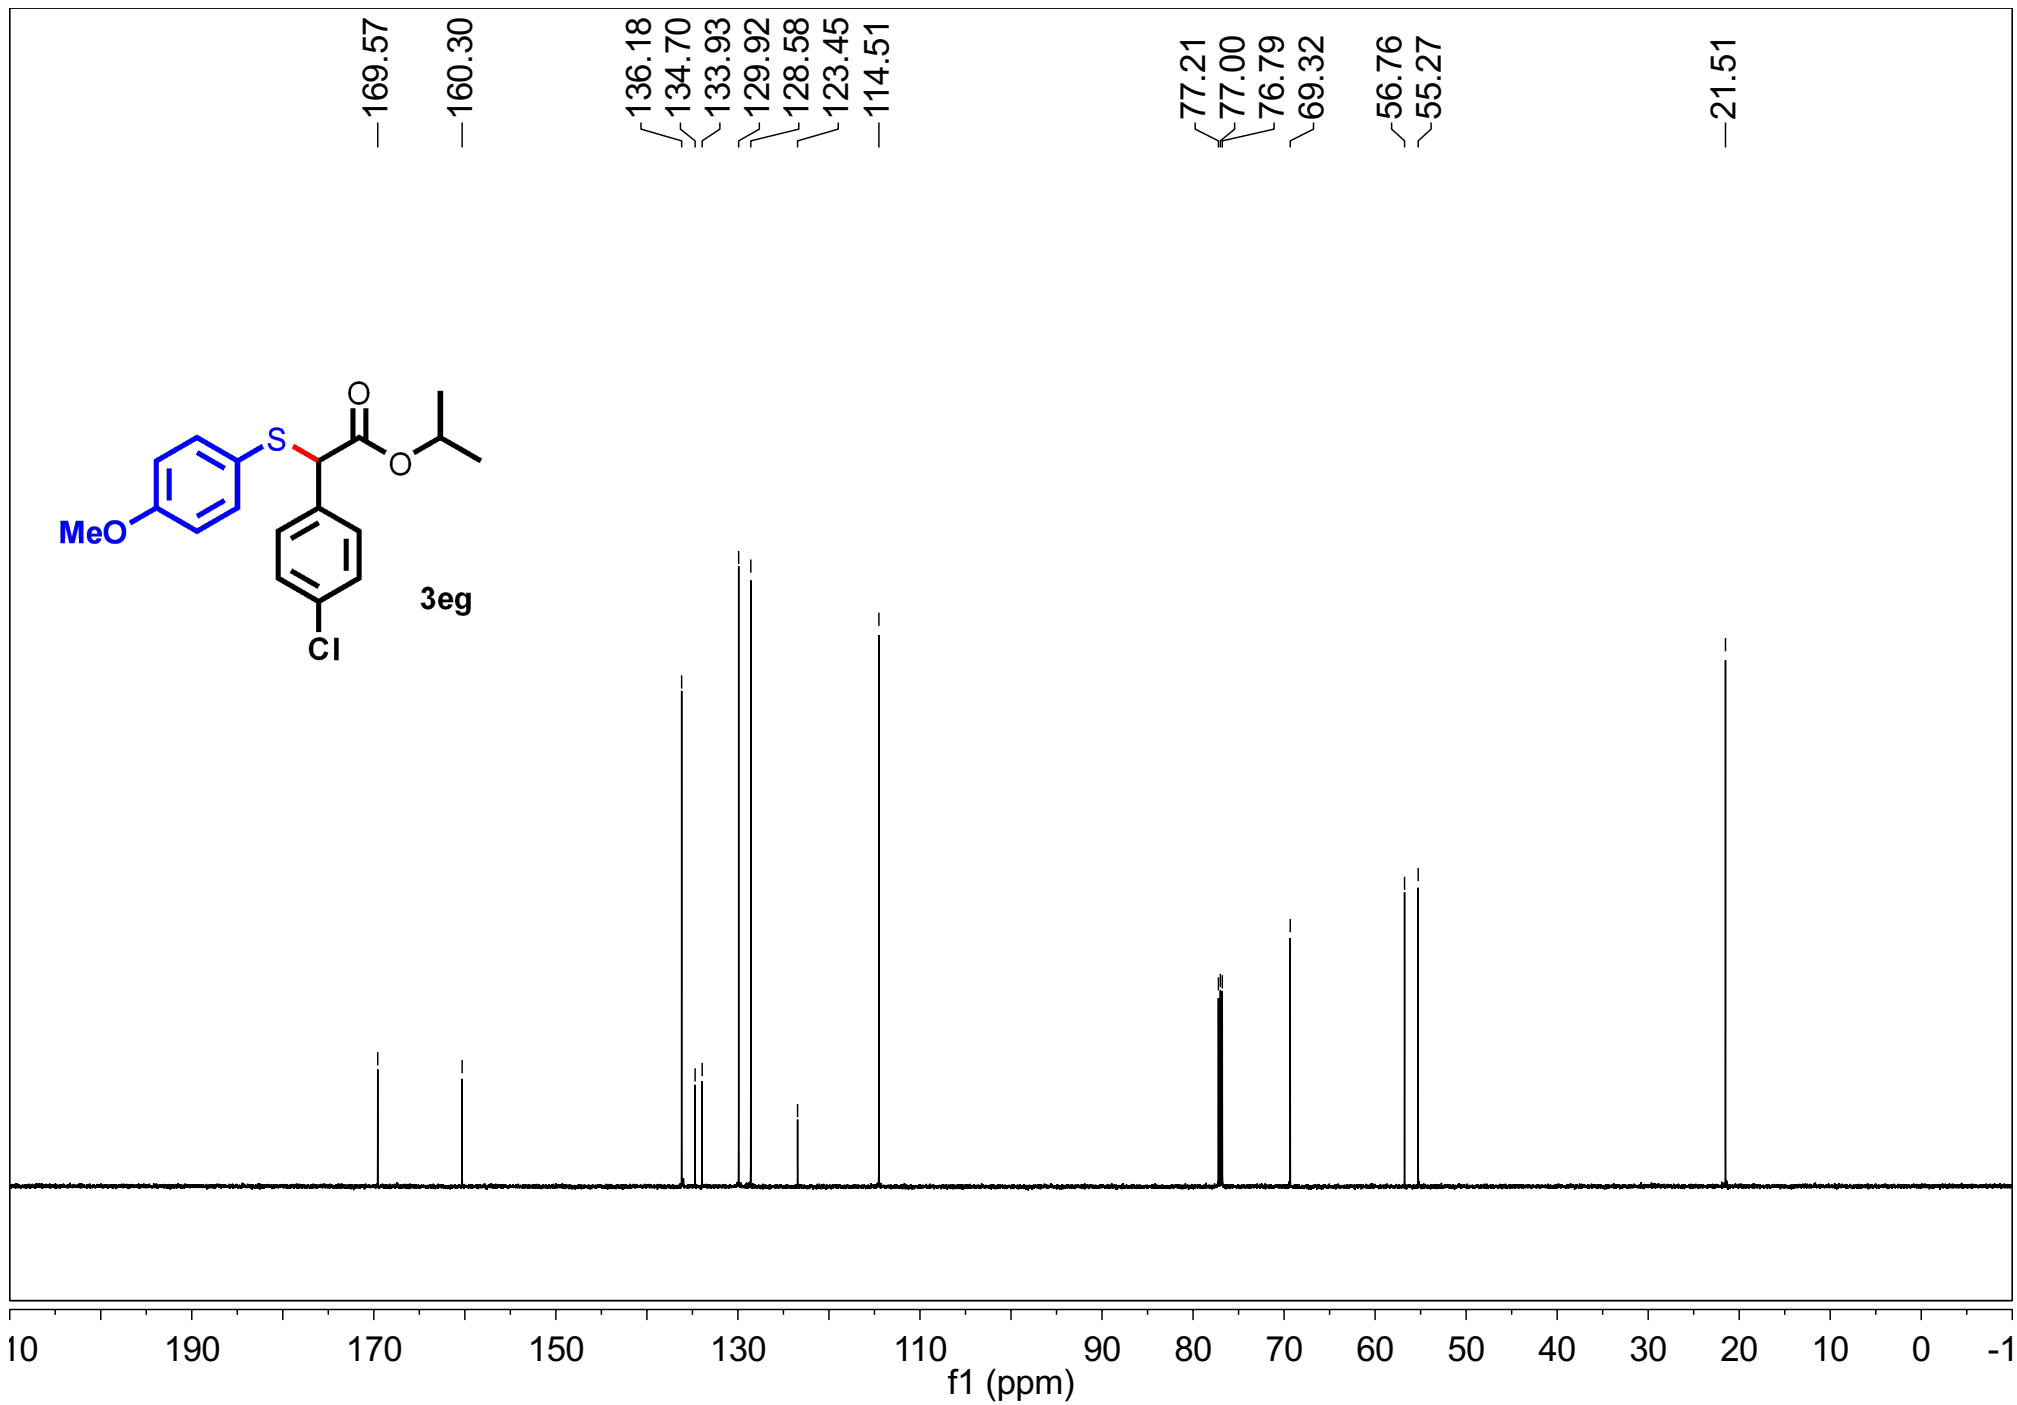

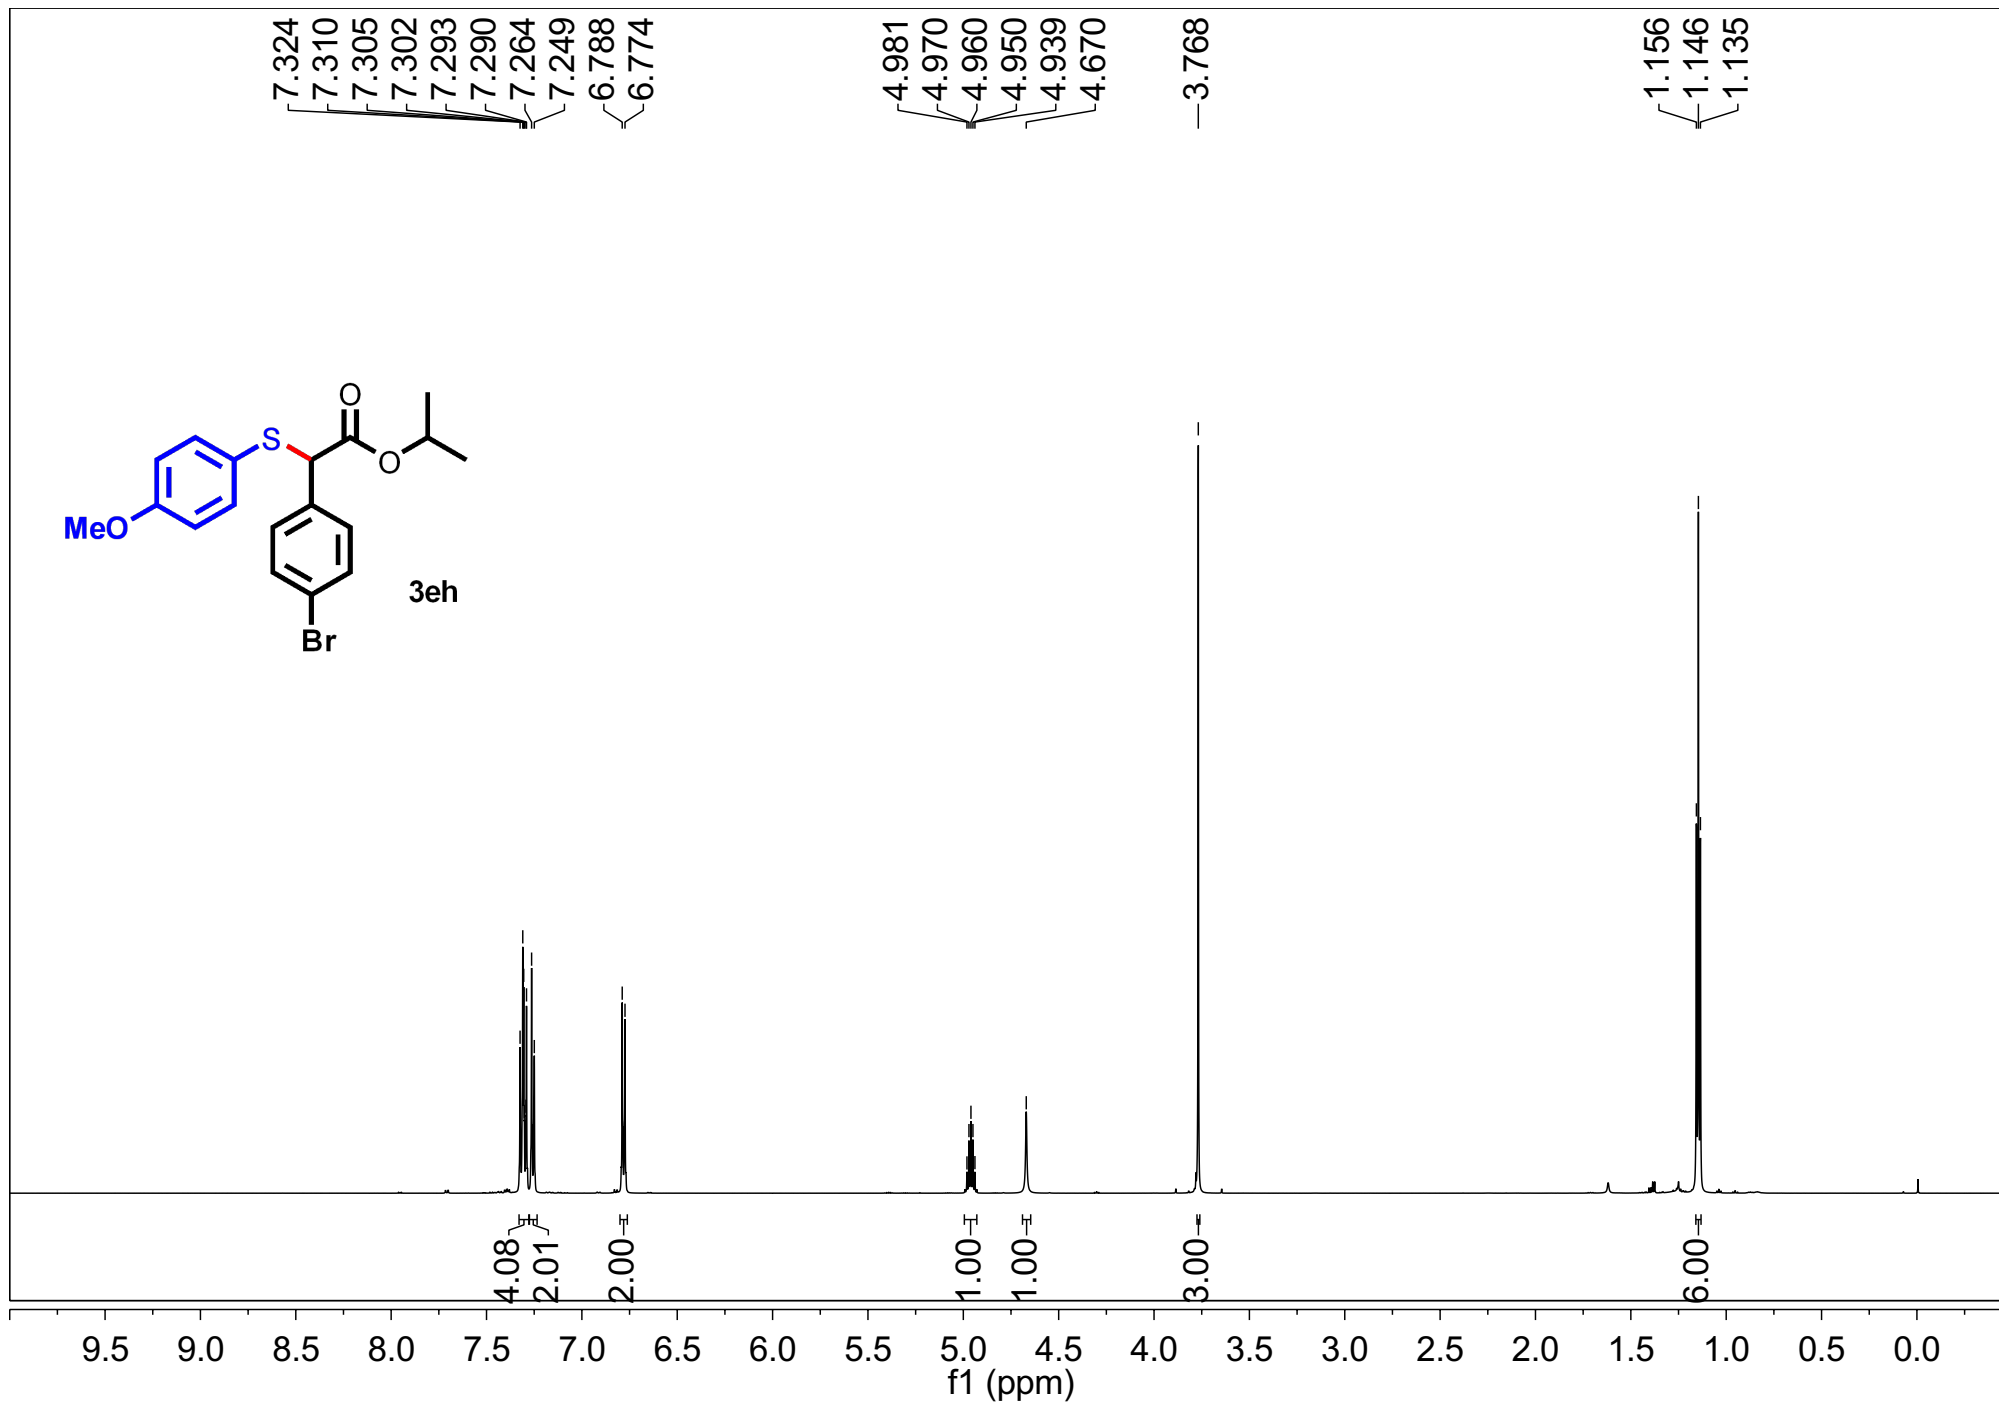

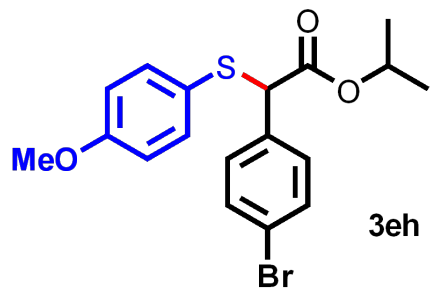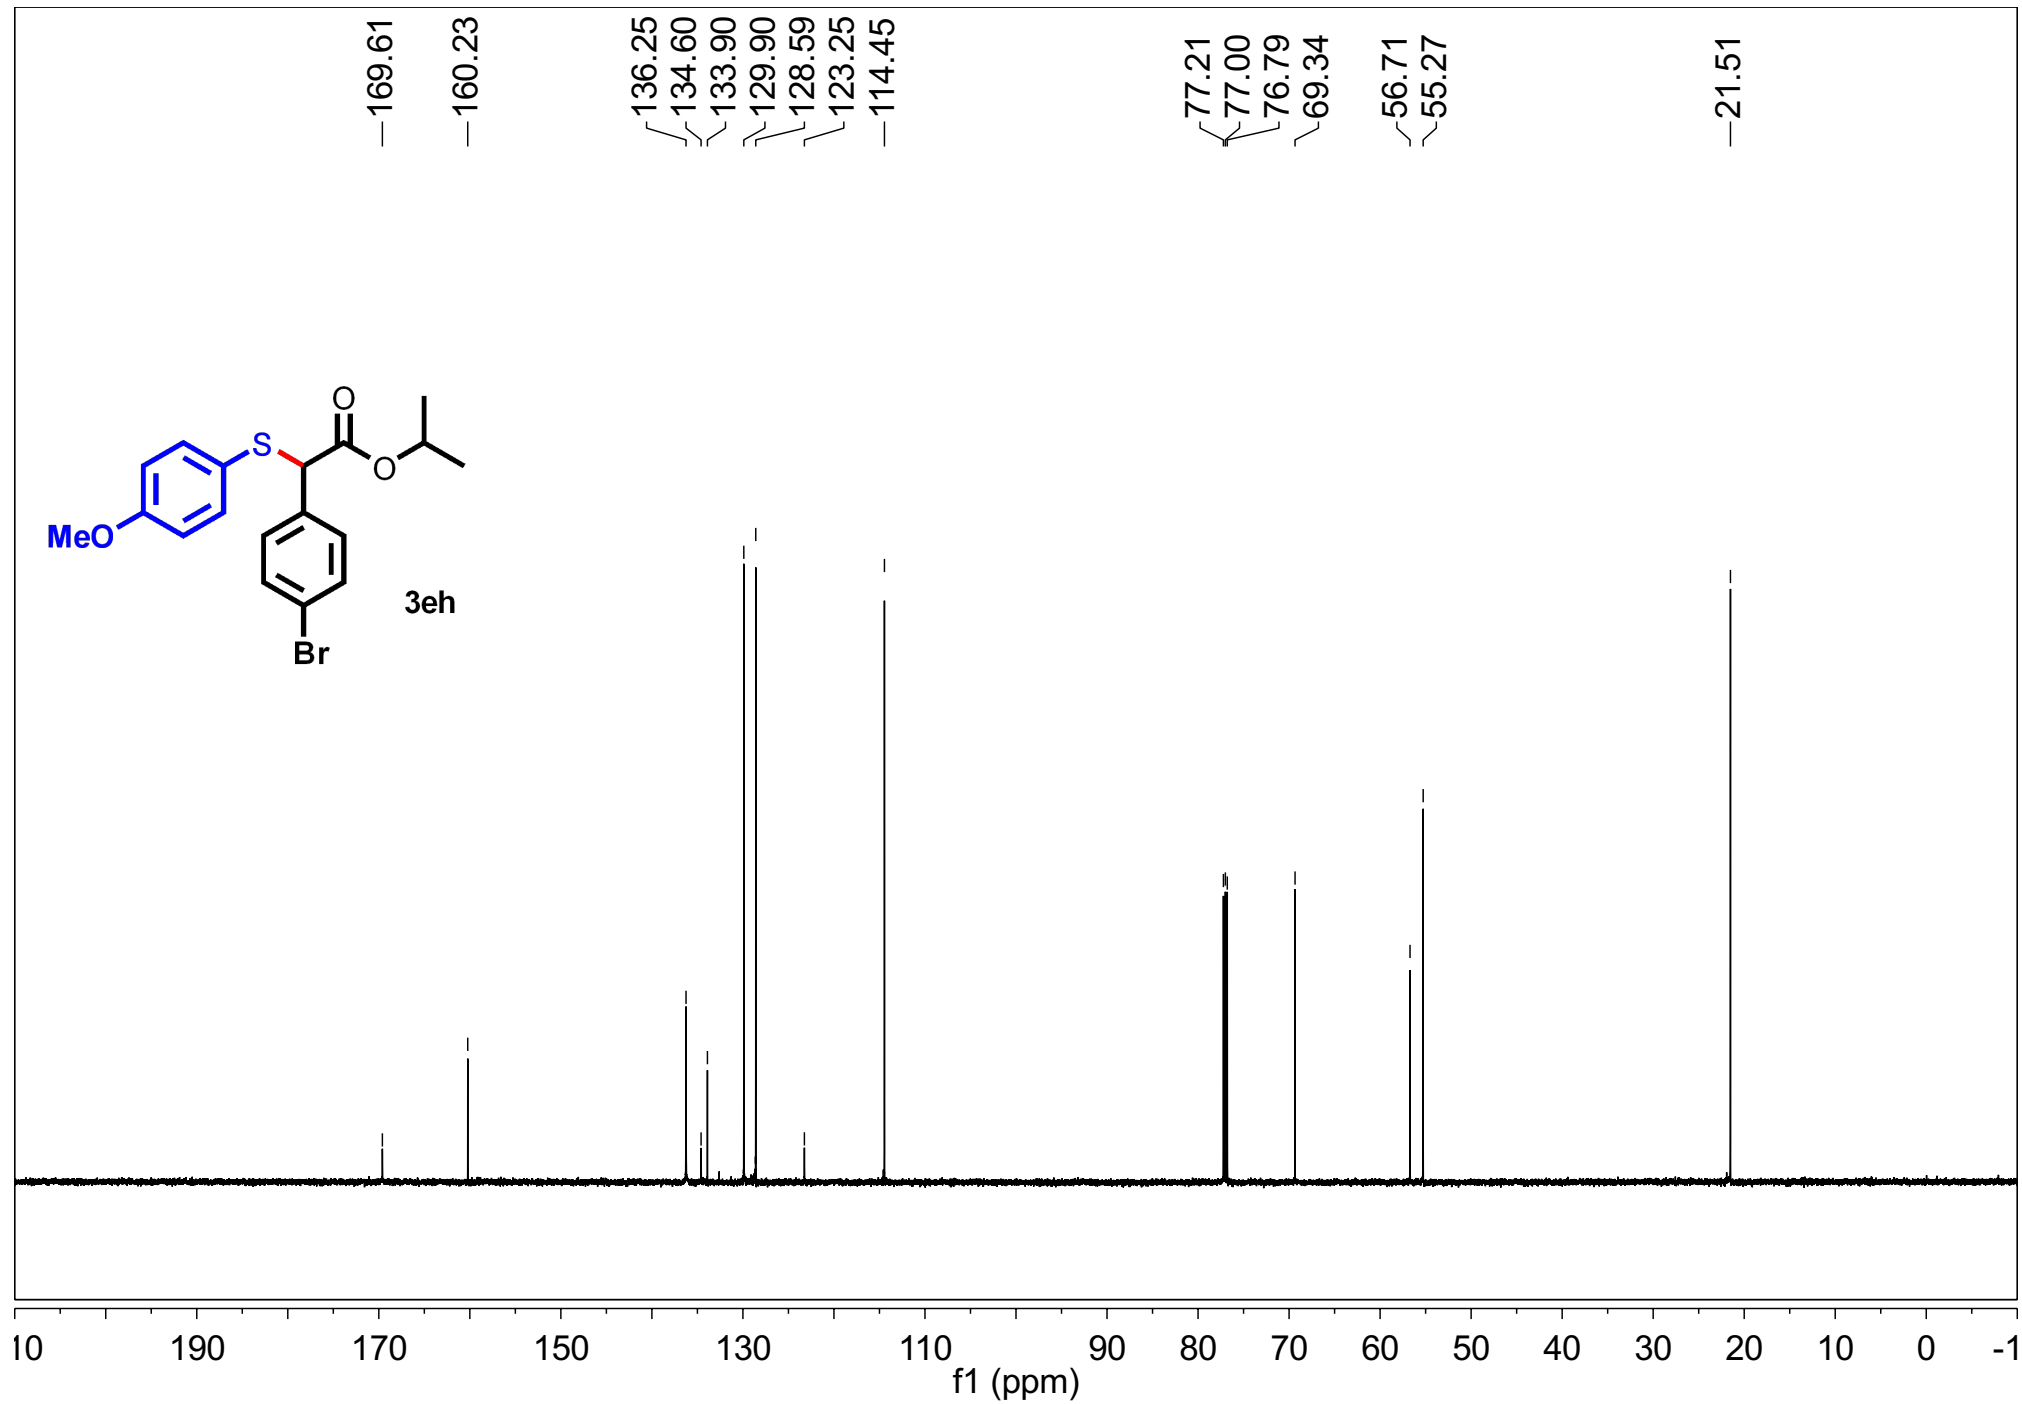

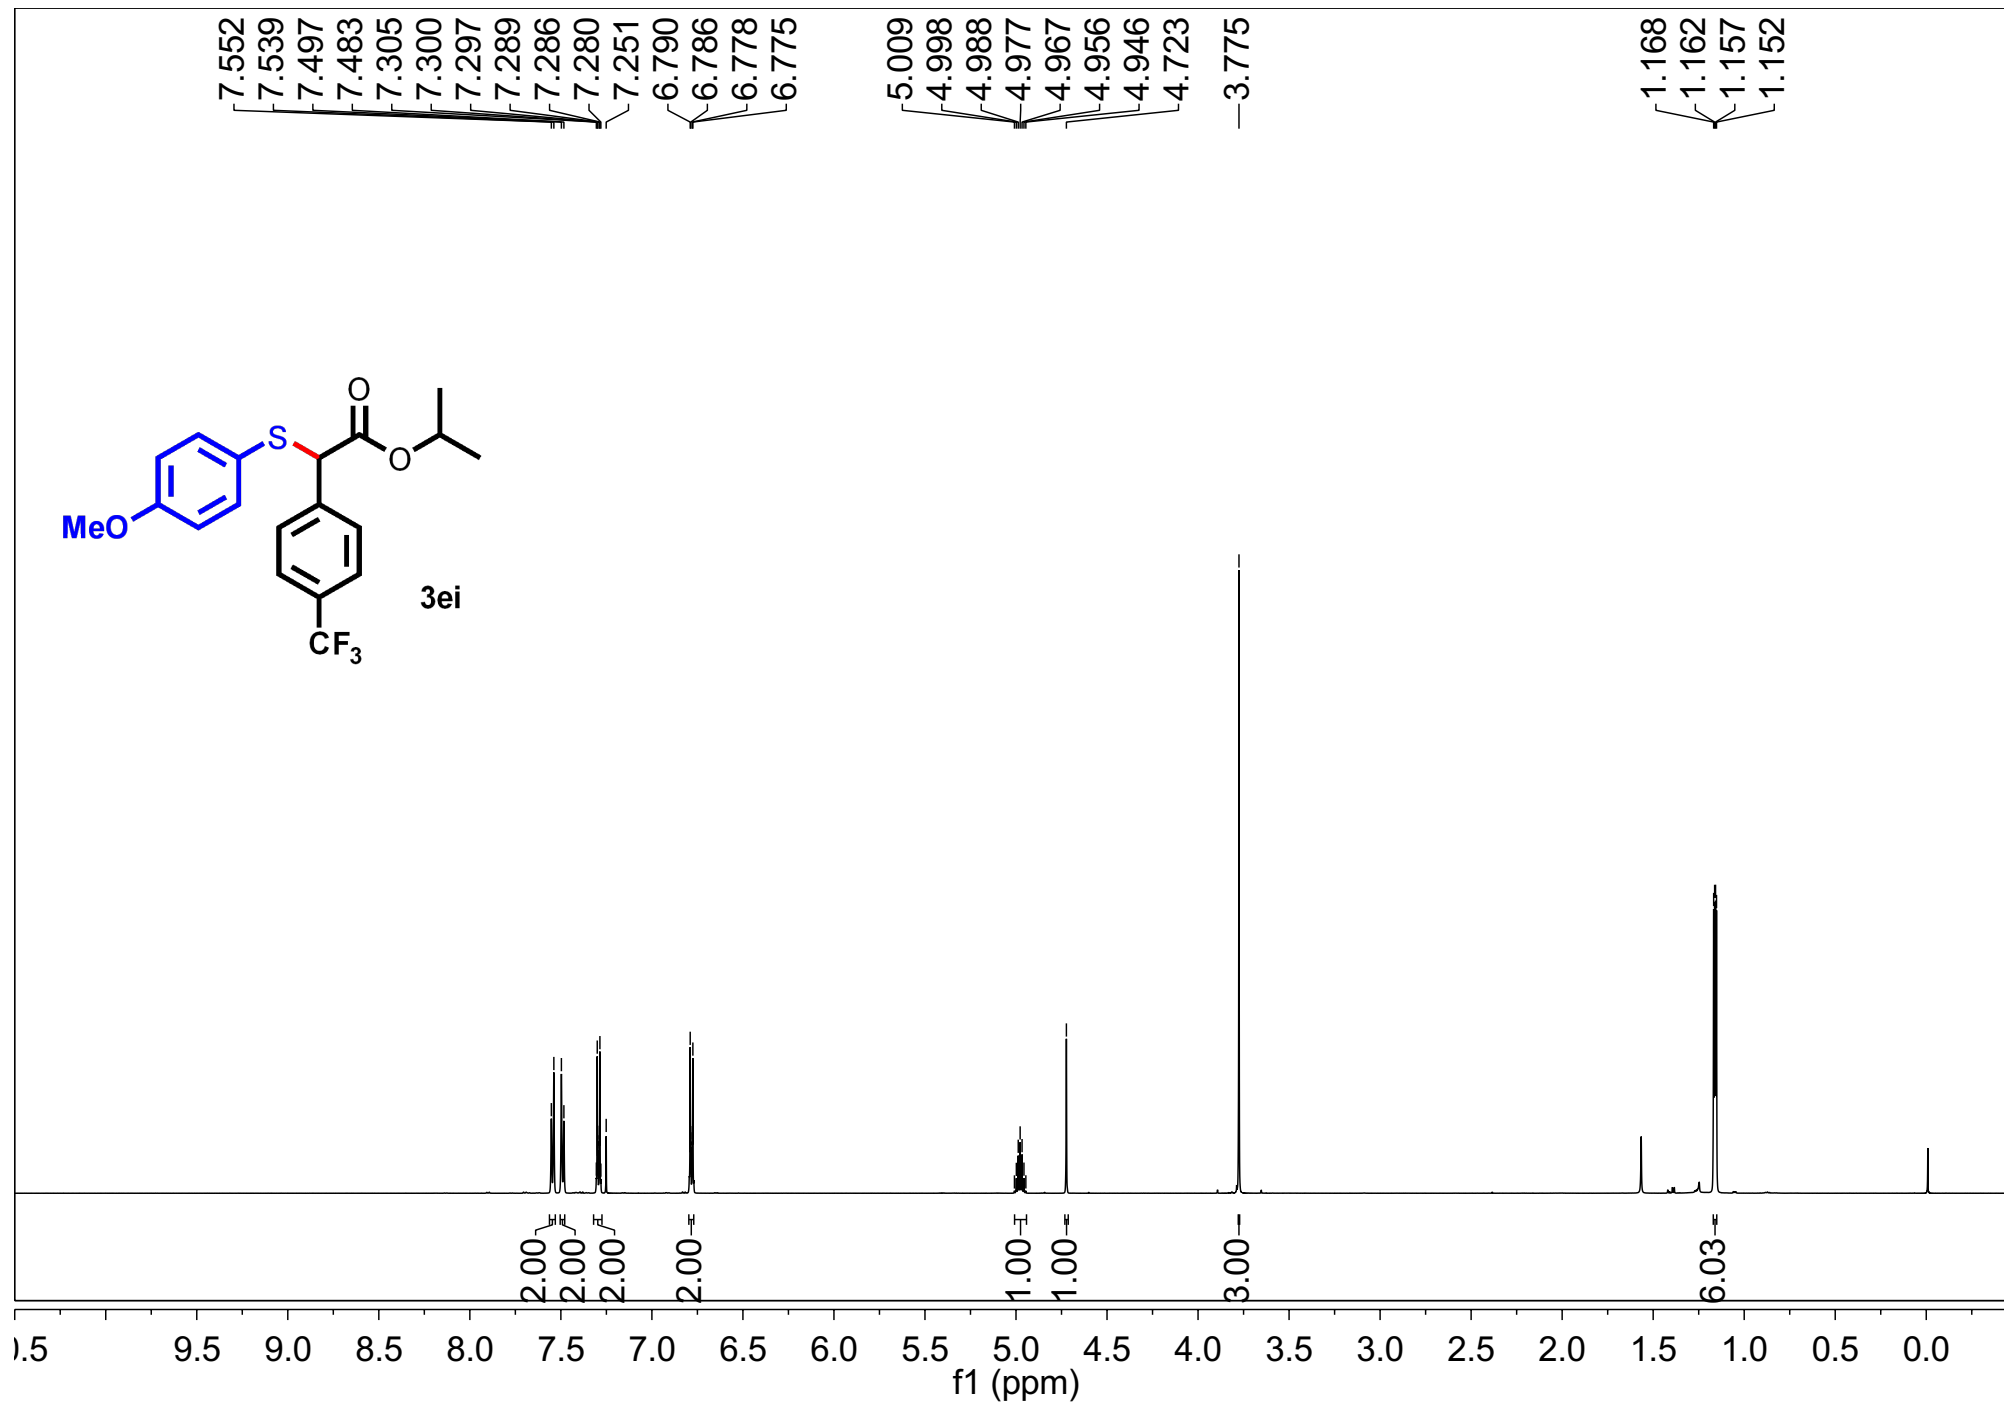

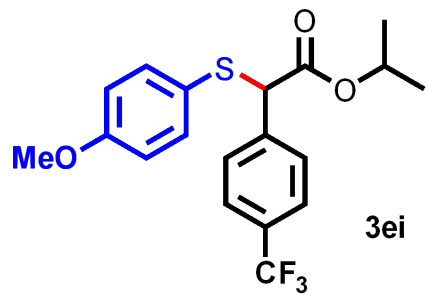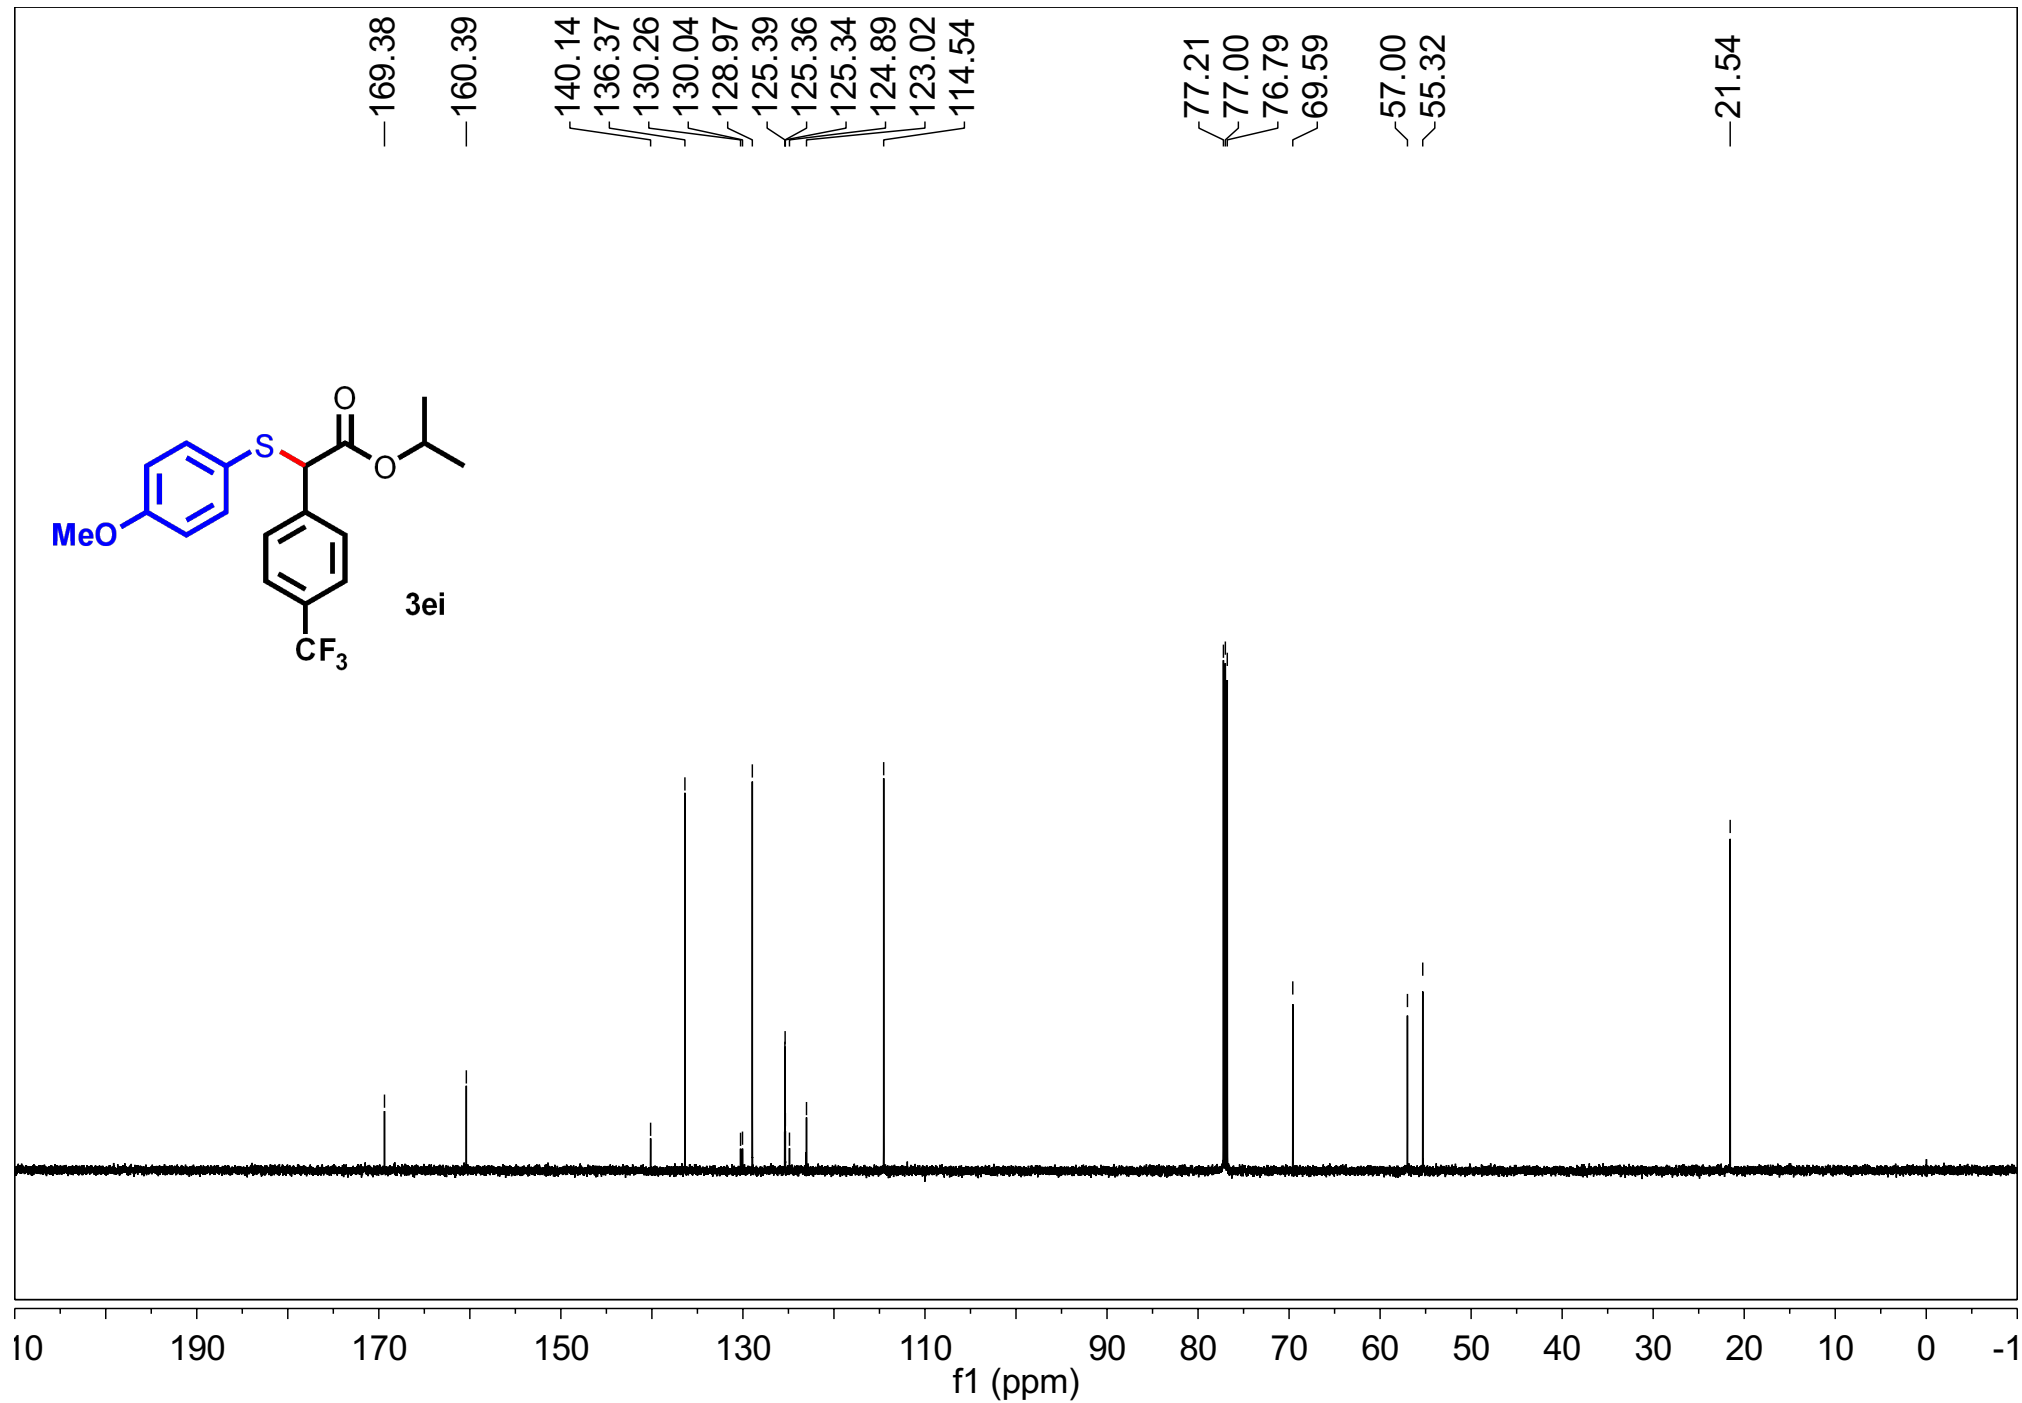

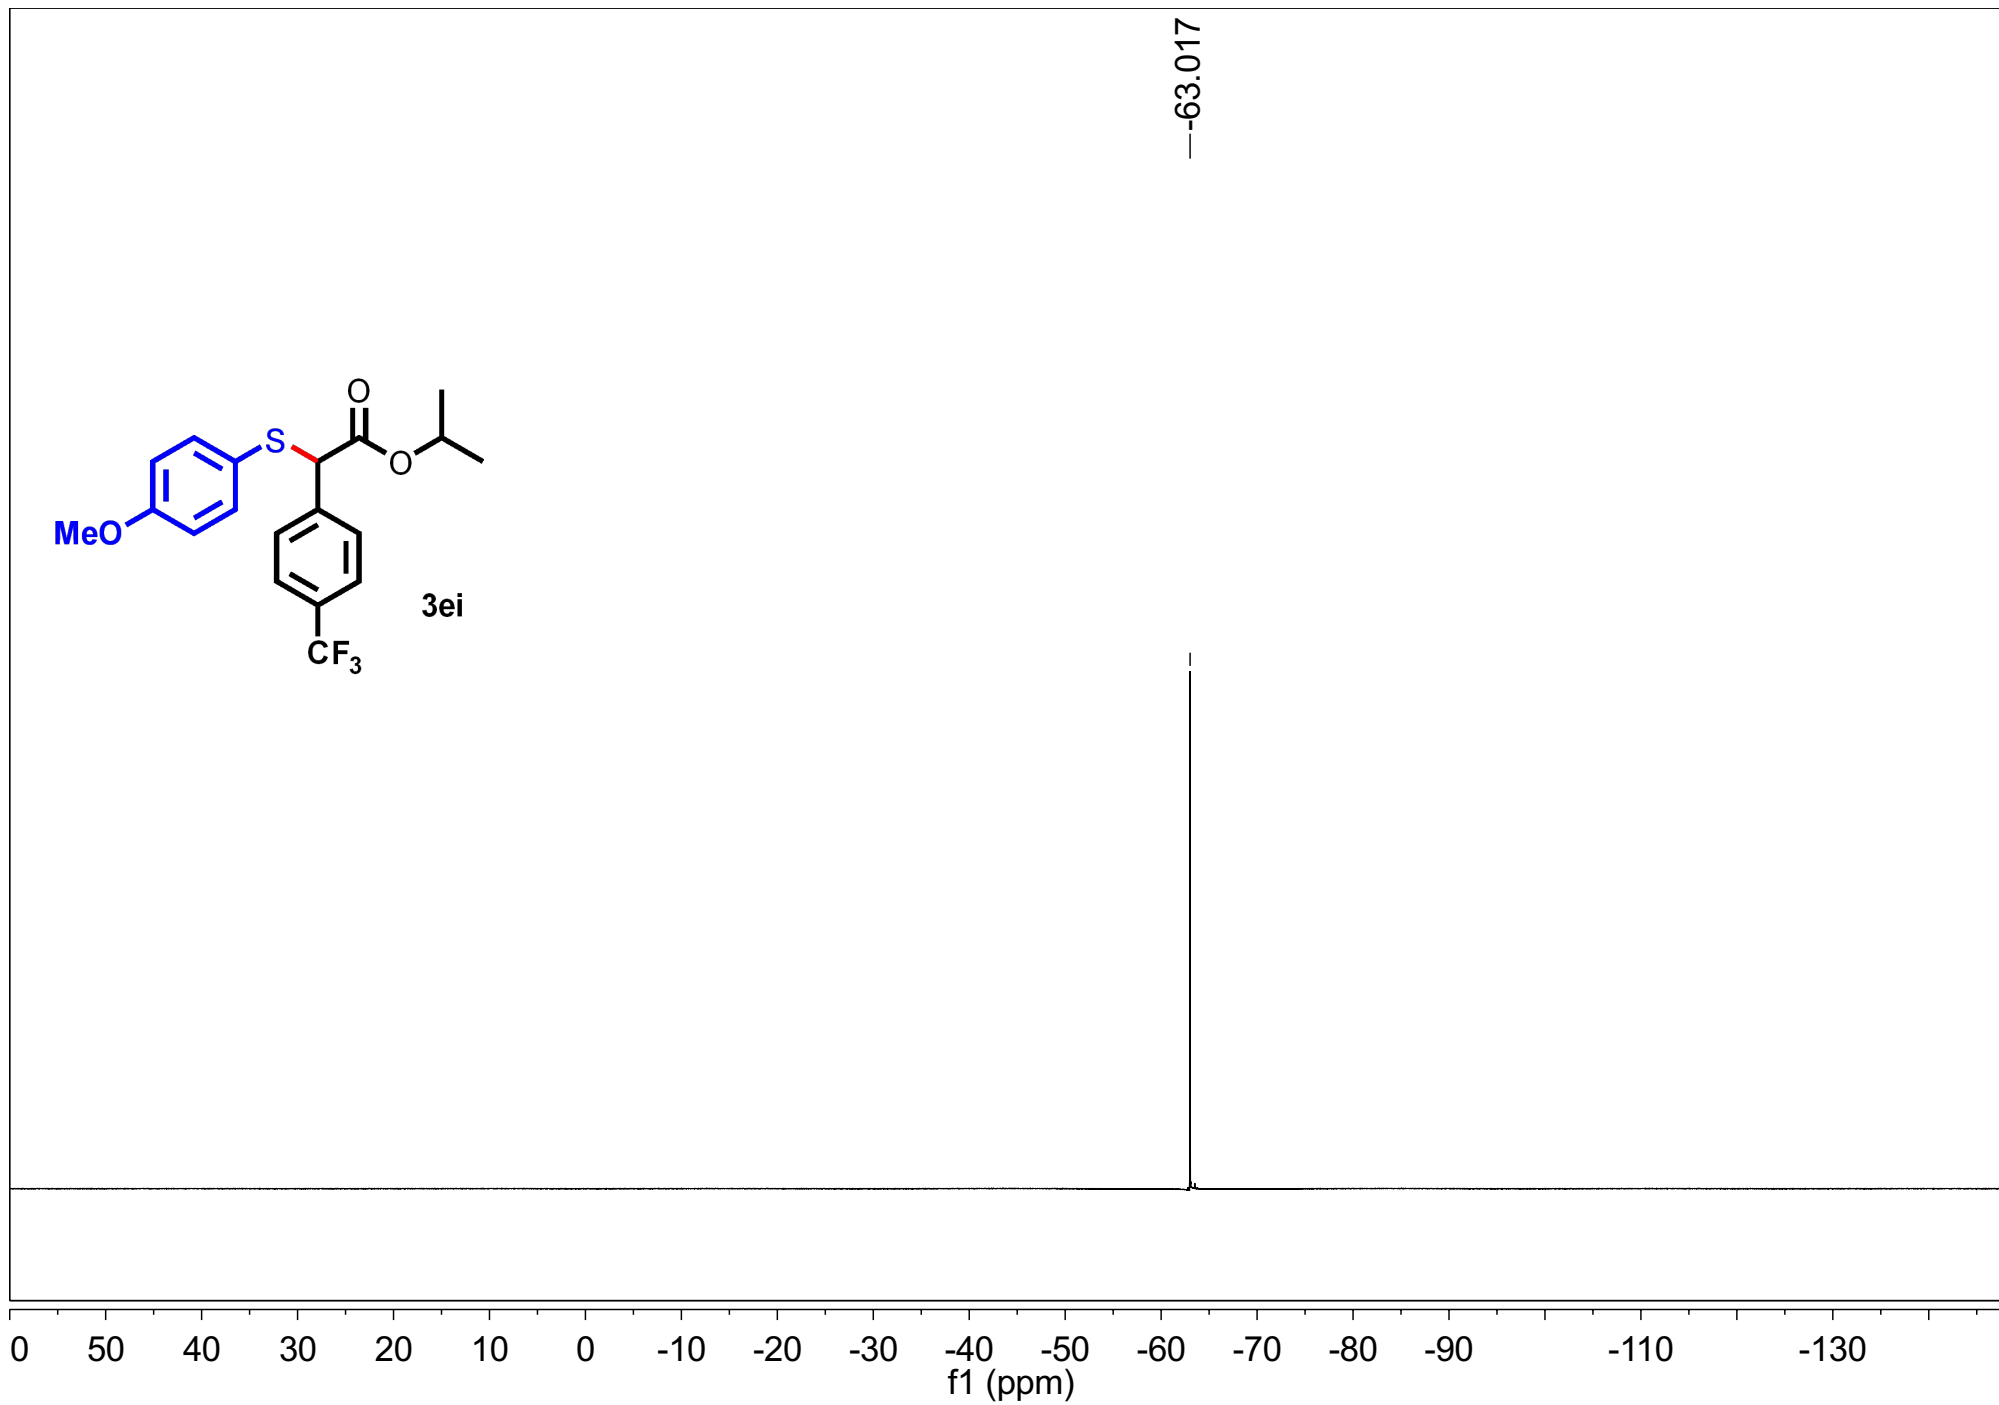

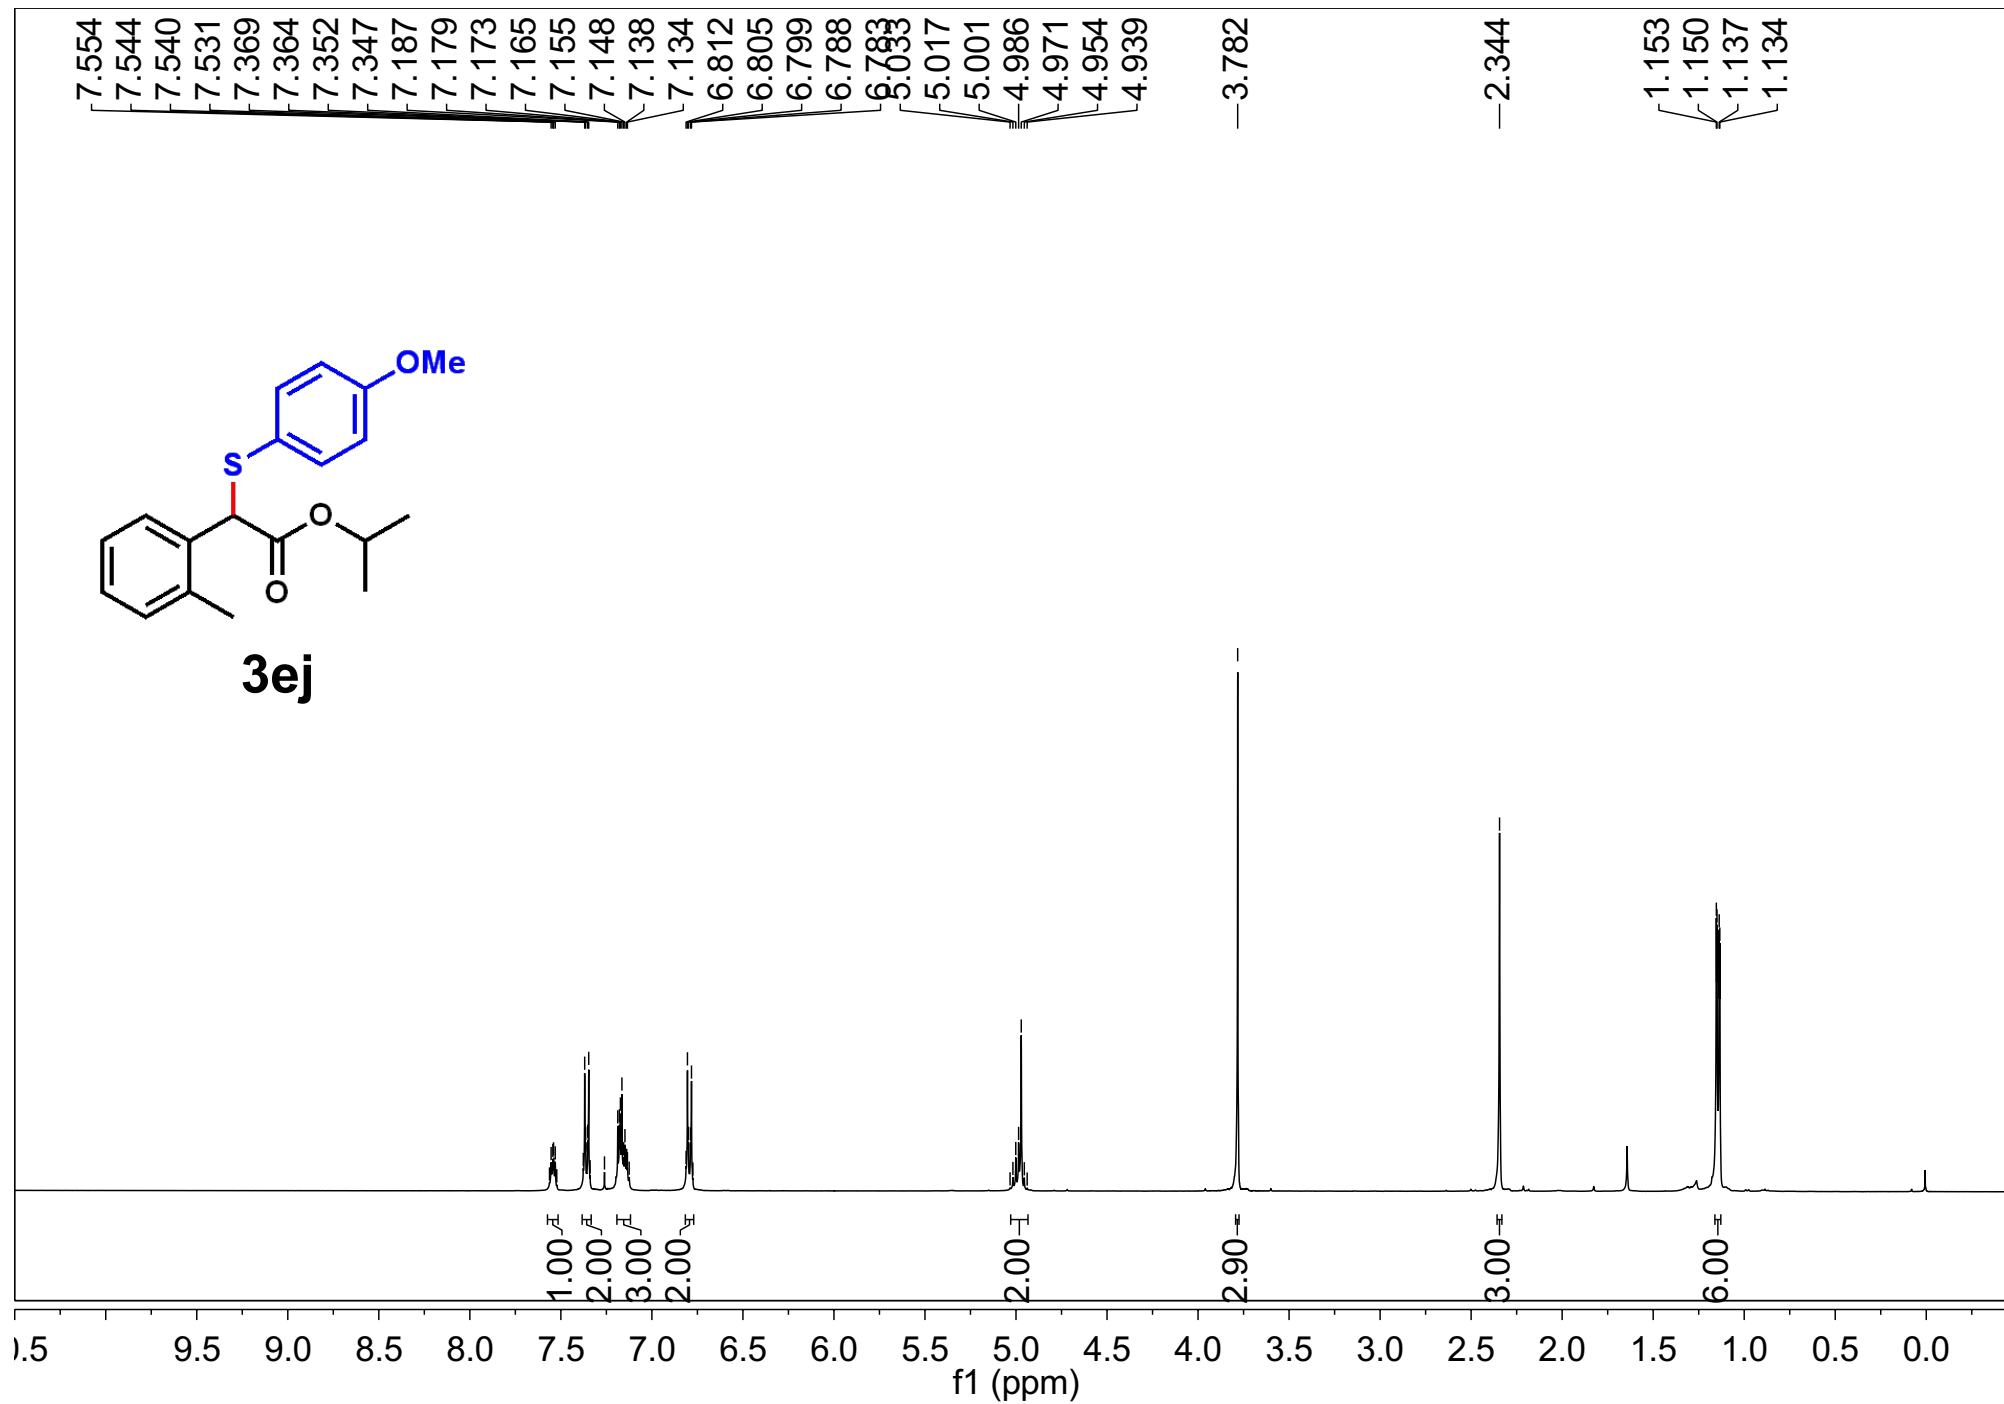



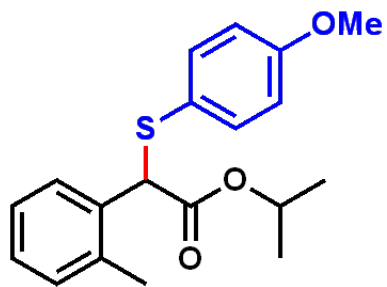

3ej

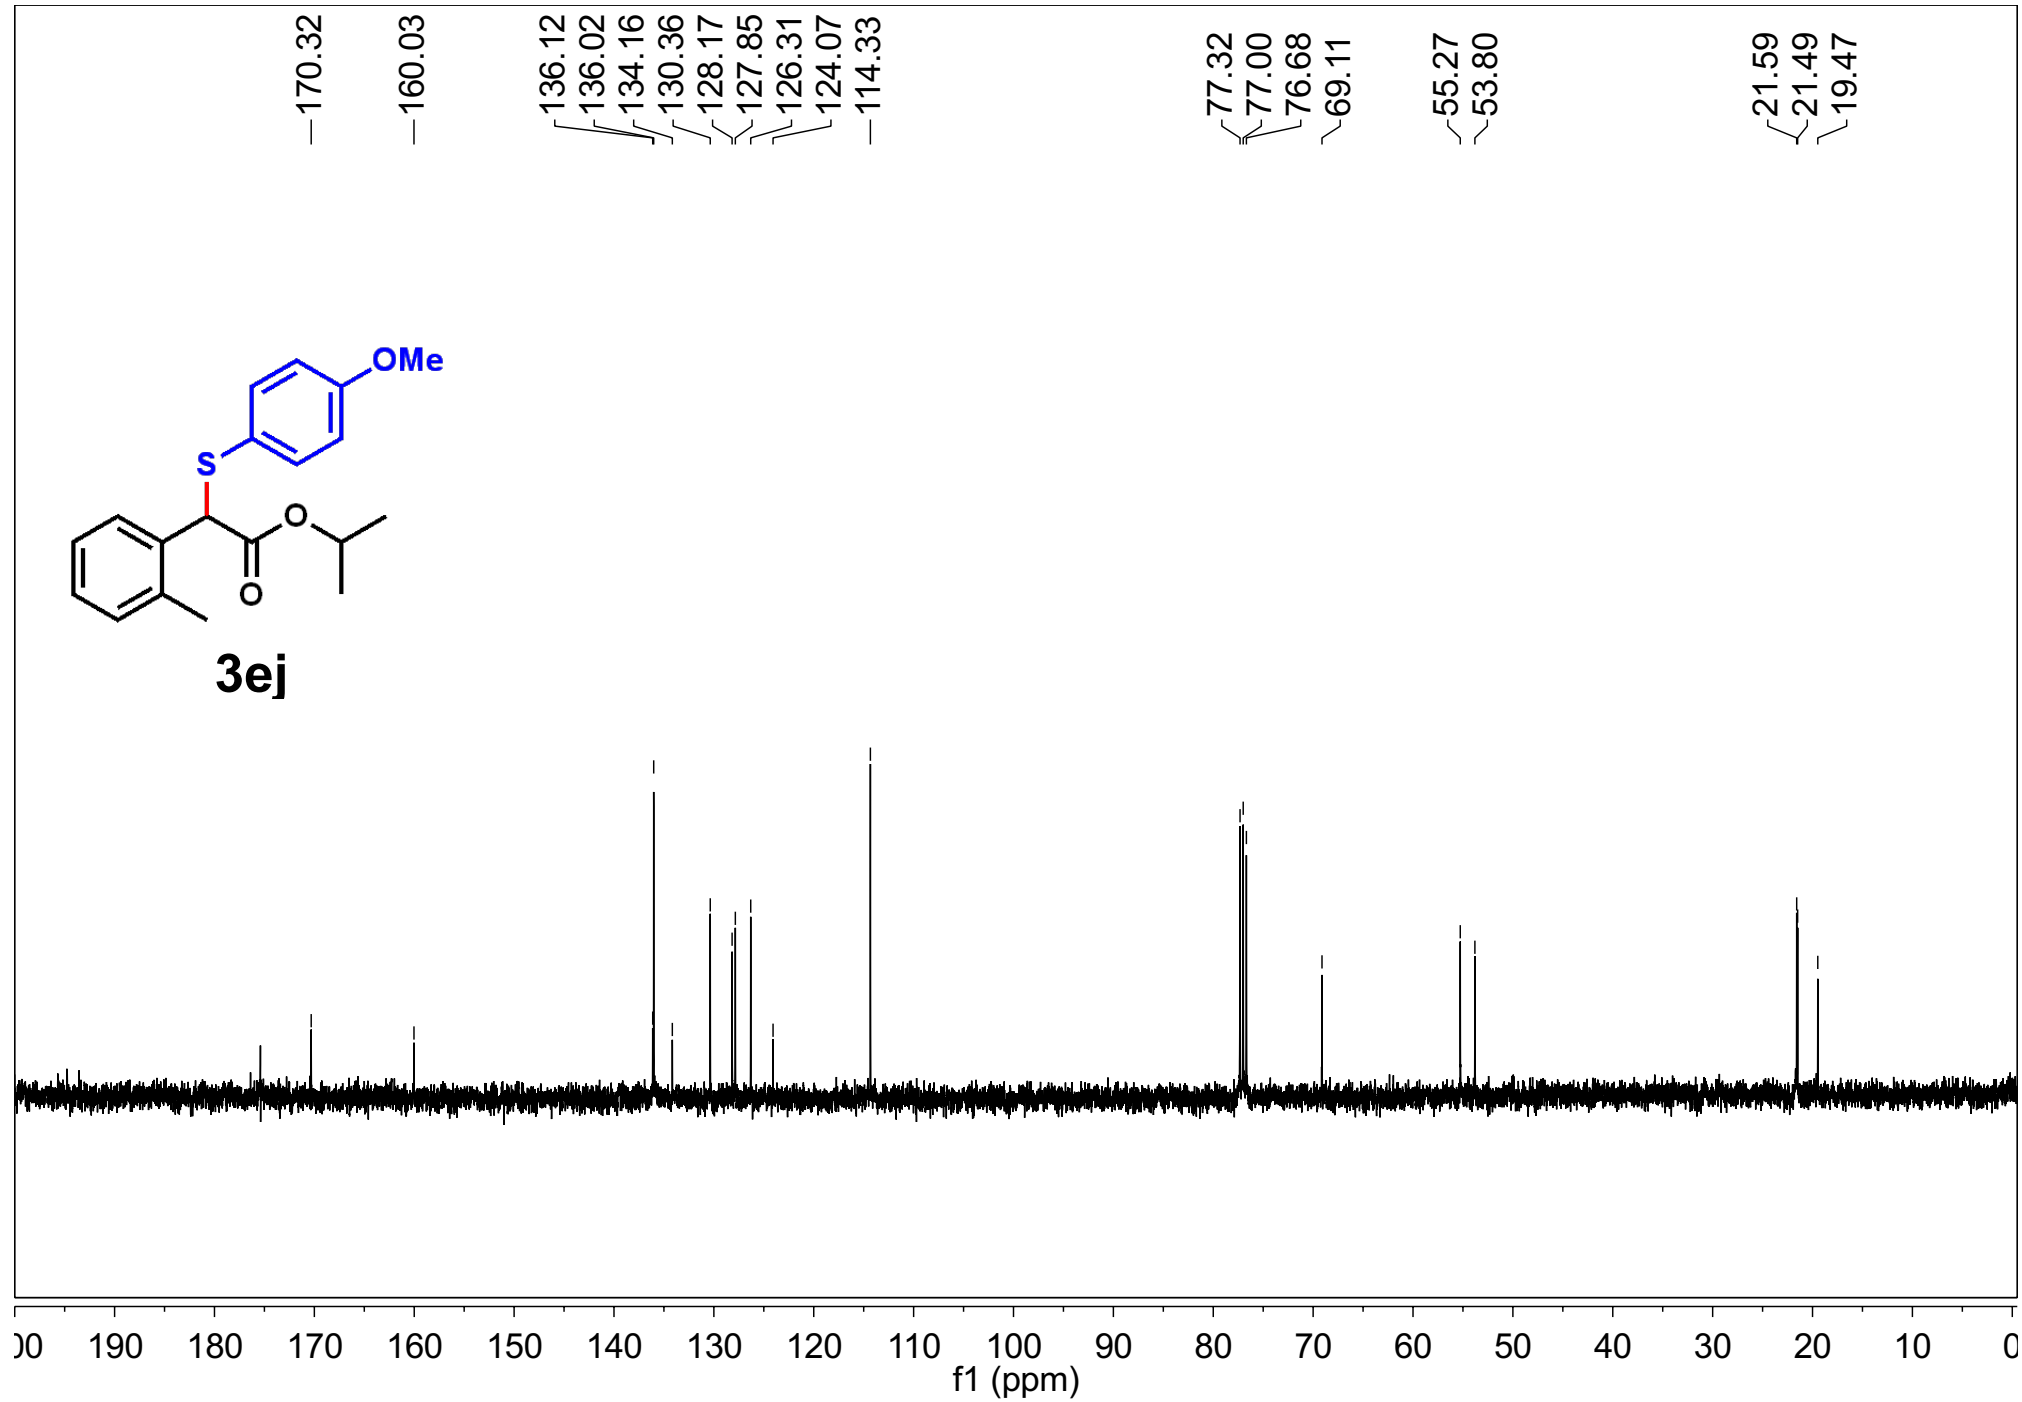

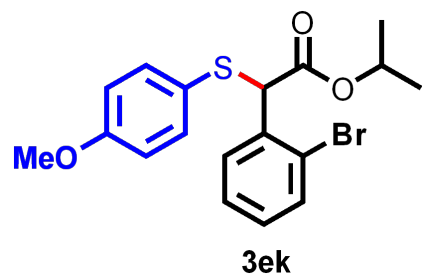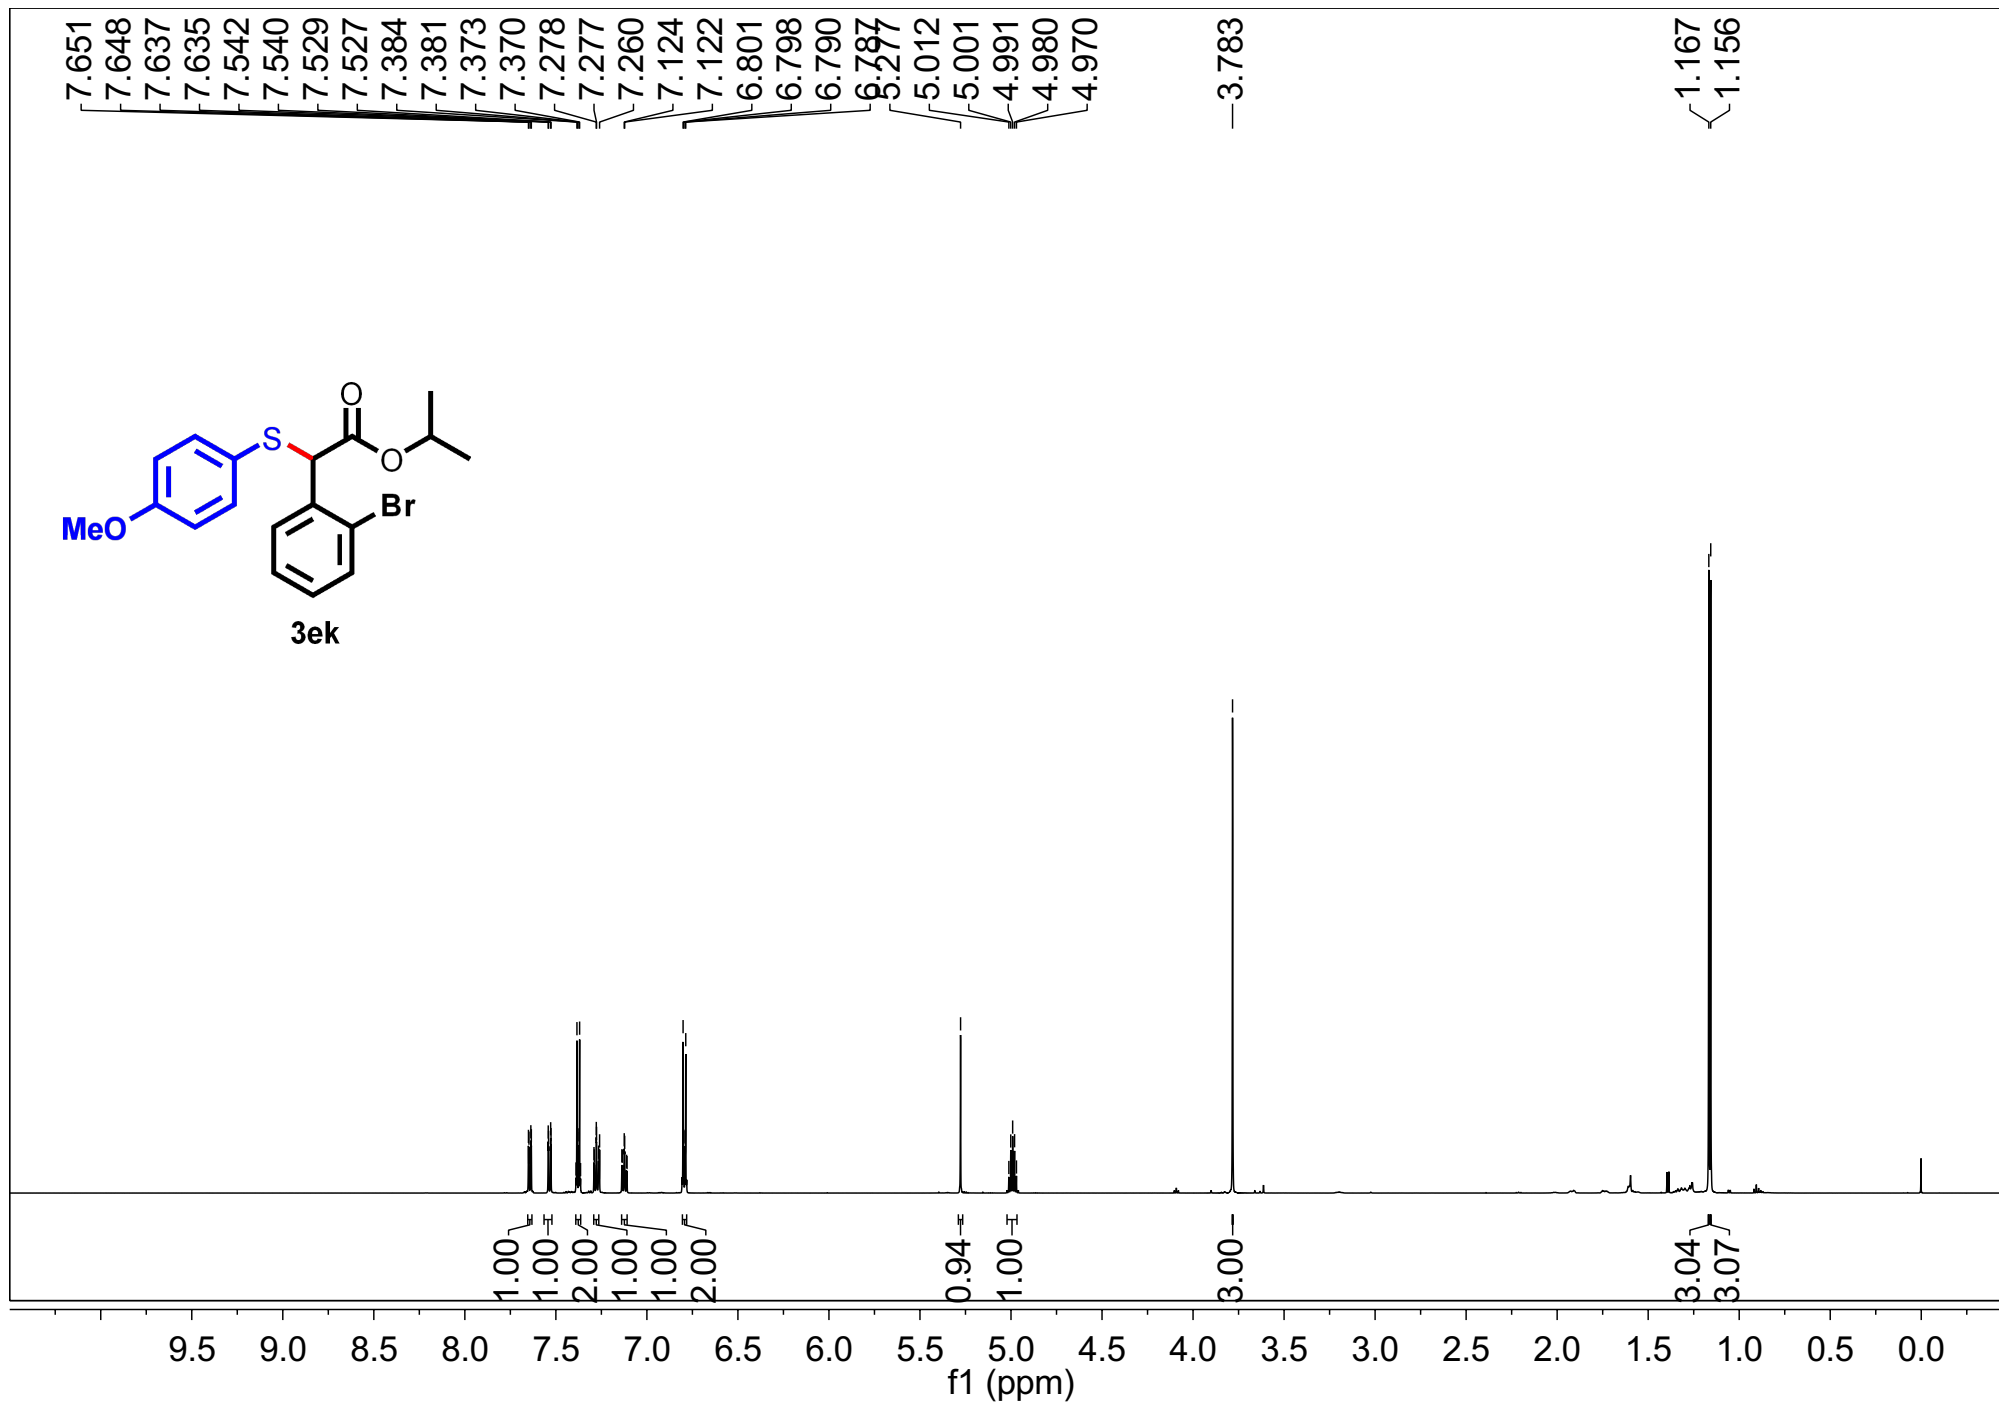

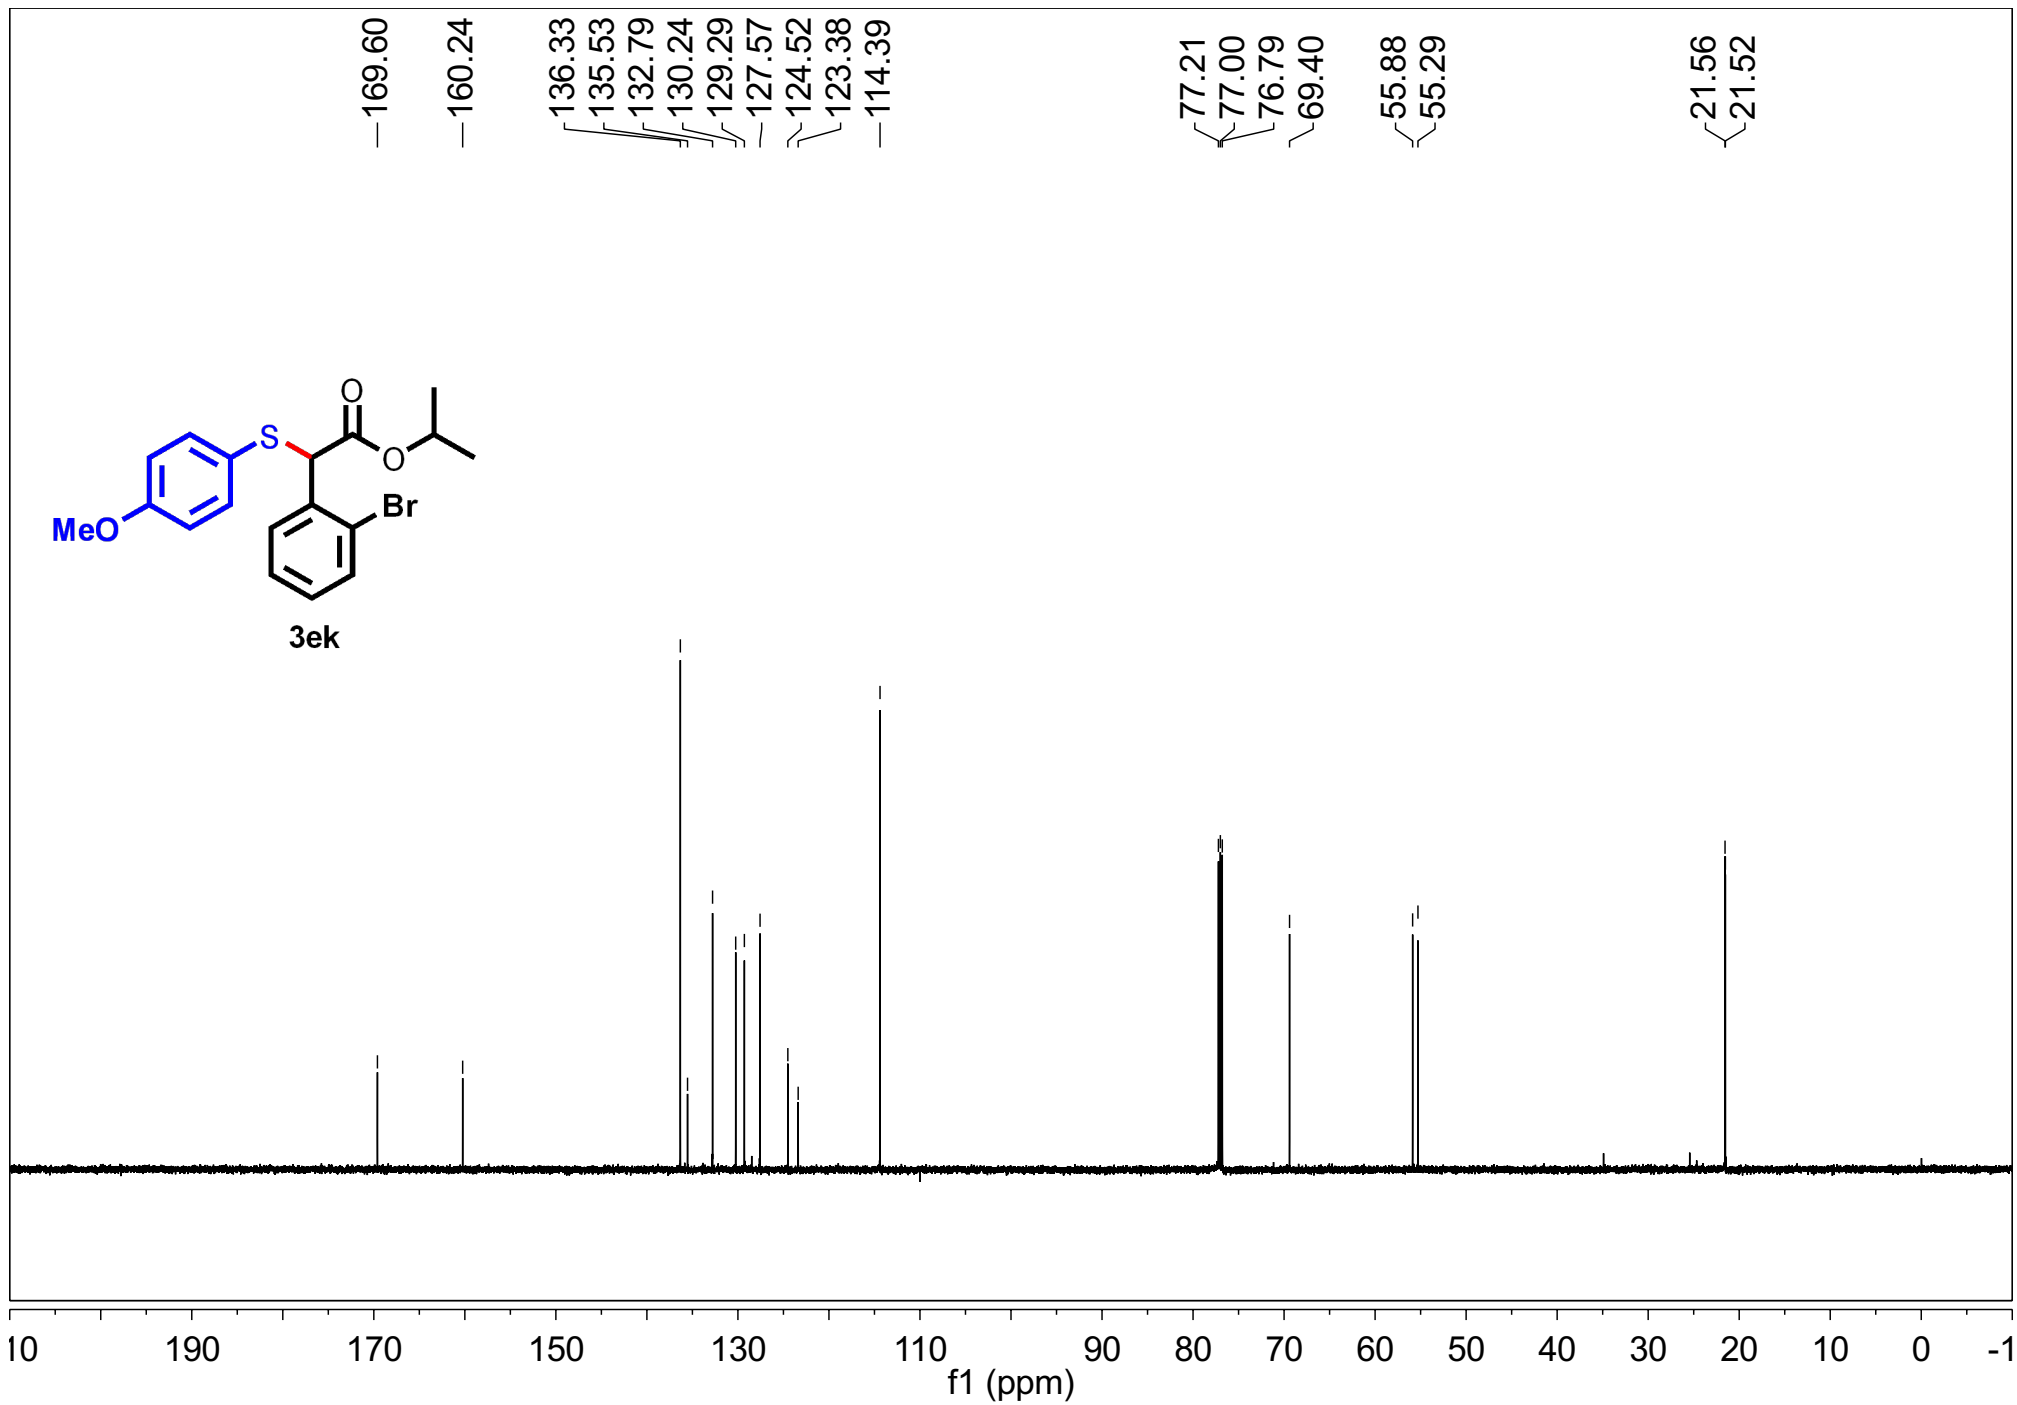

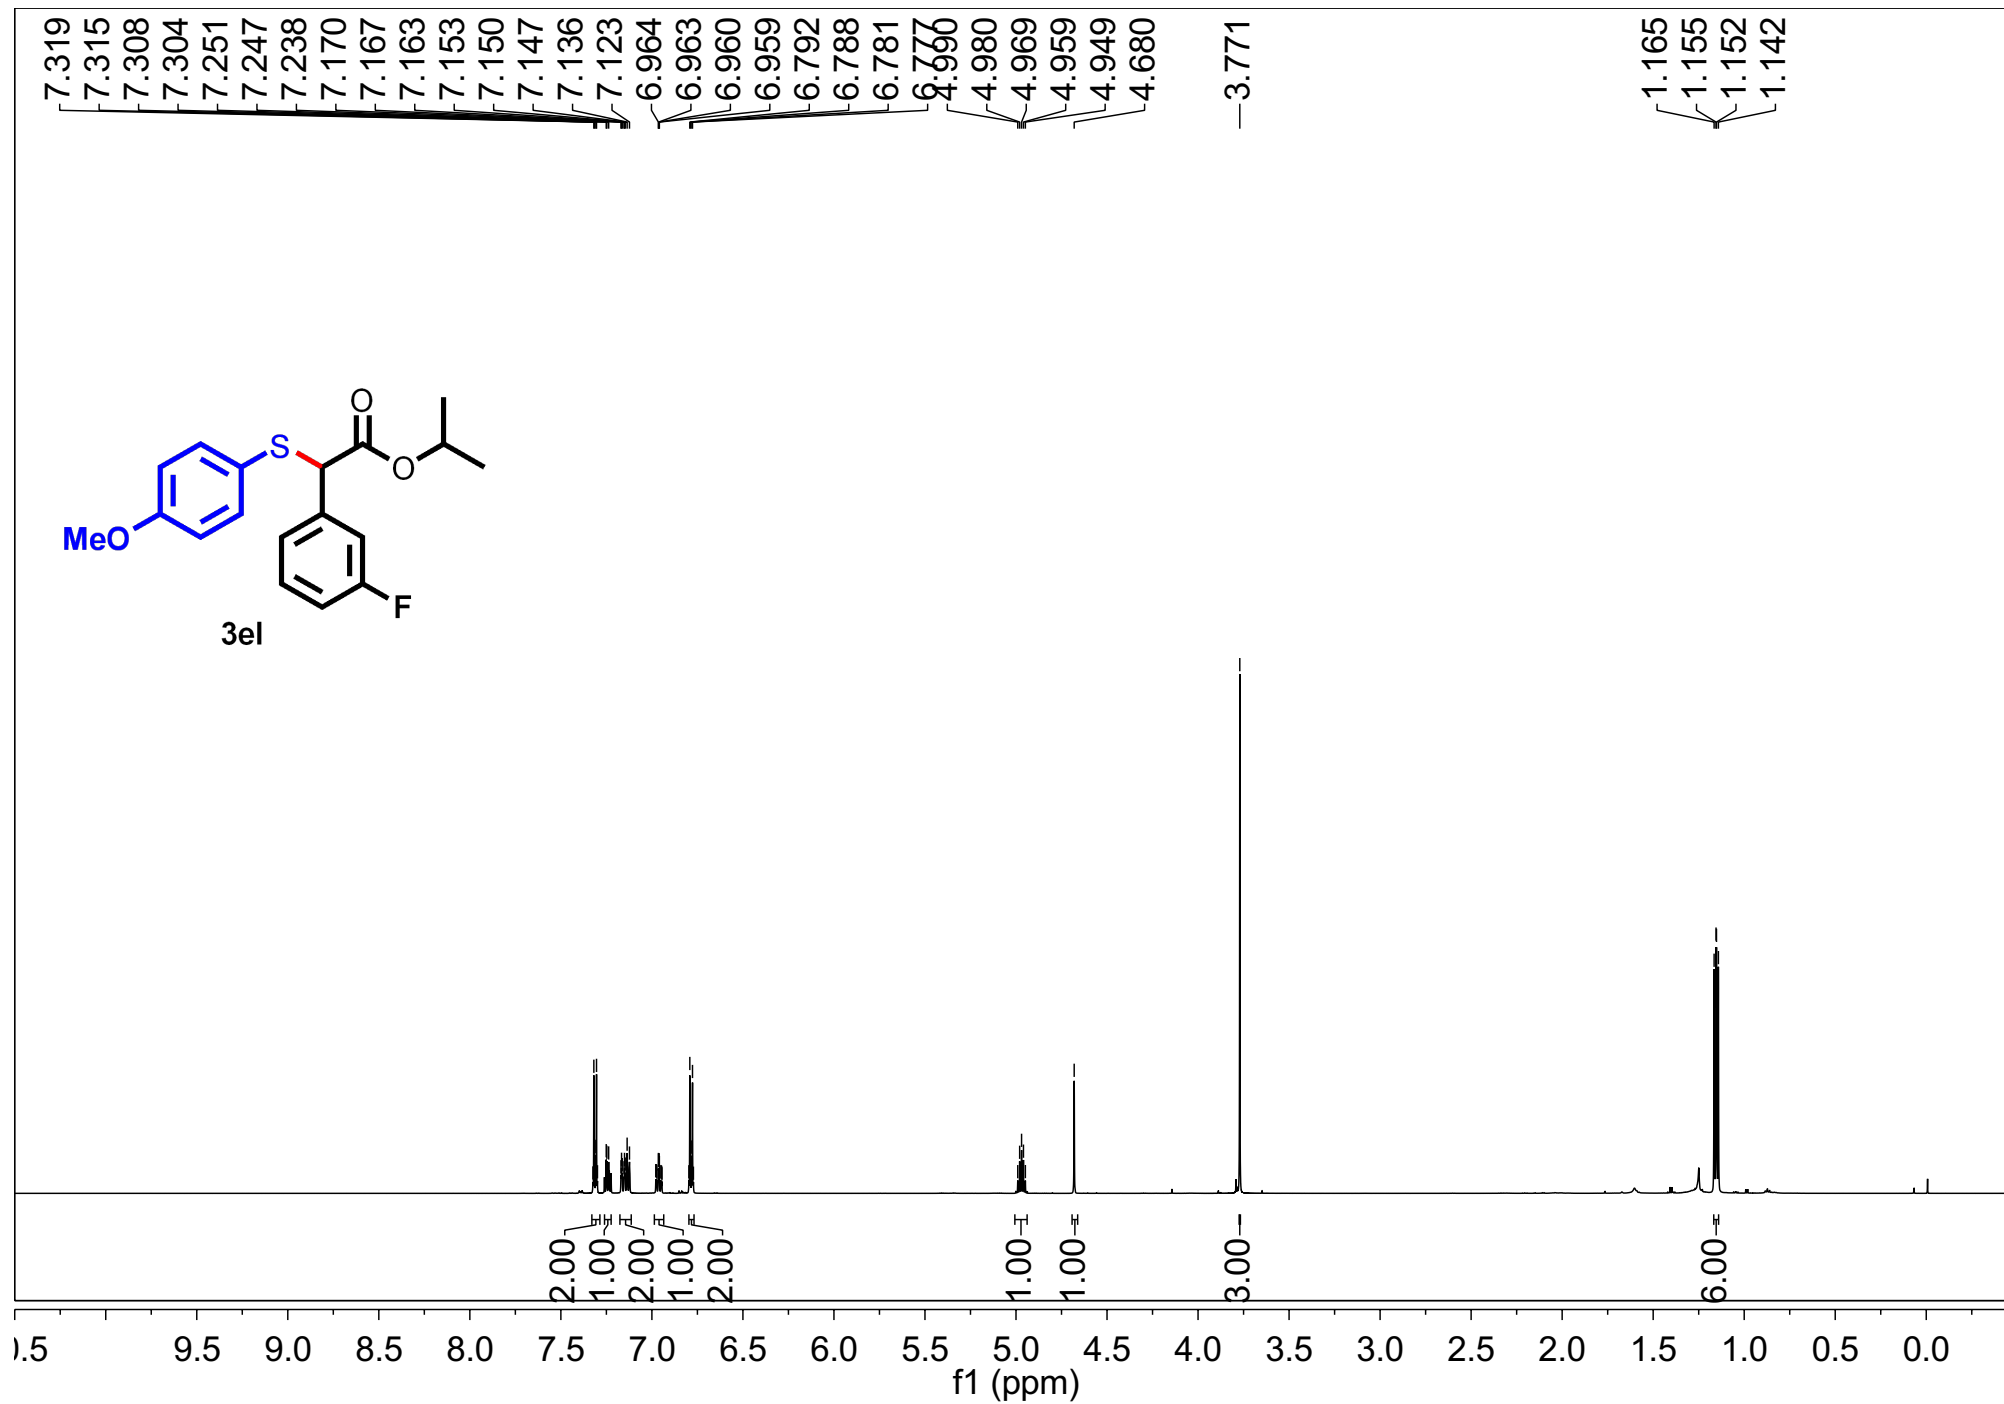

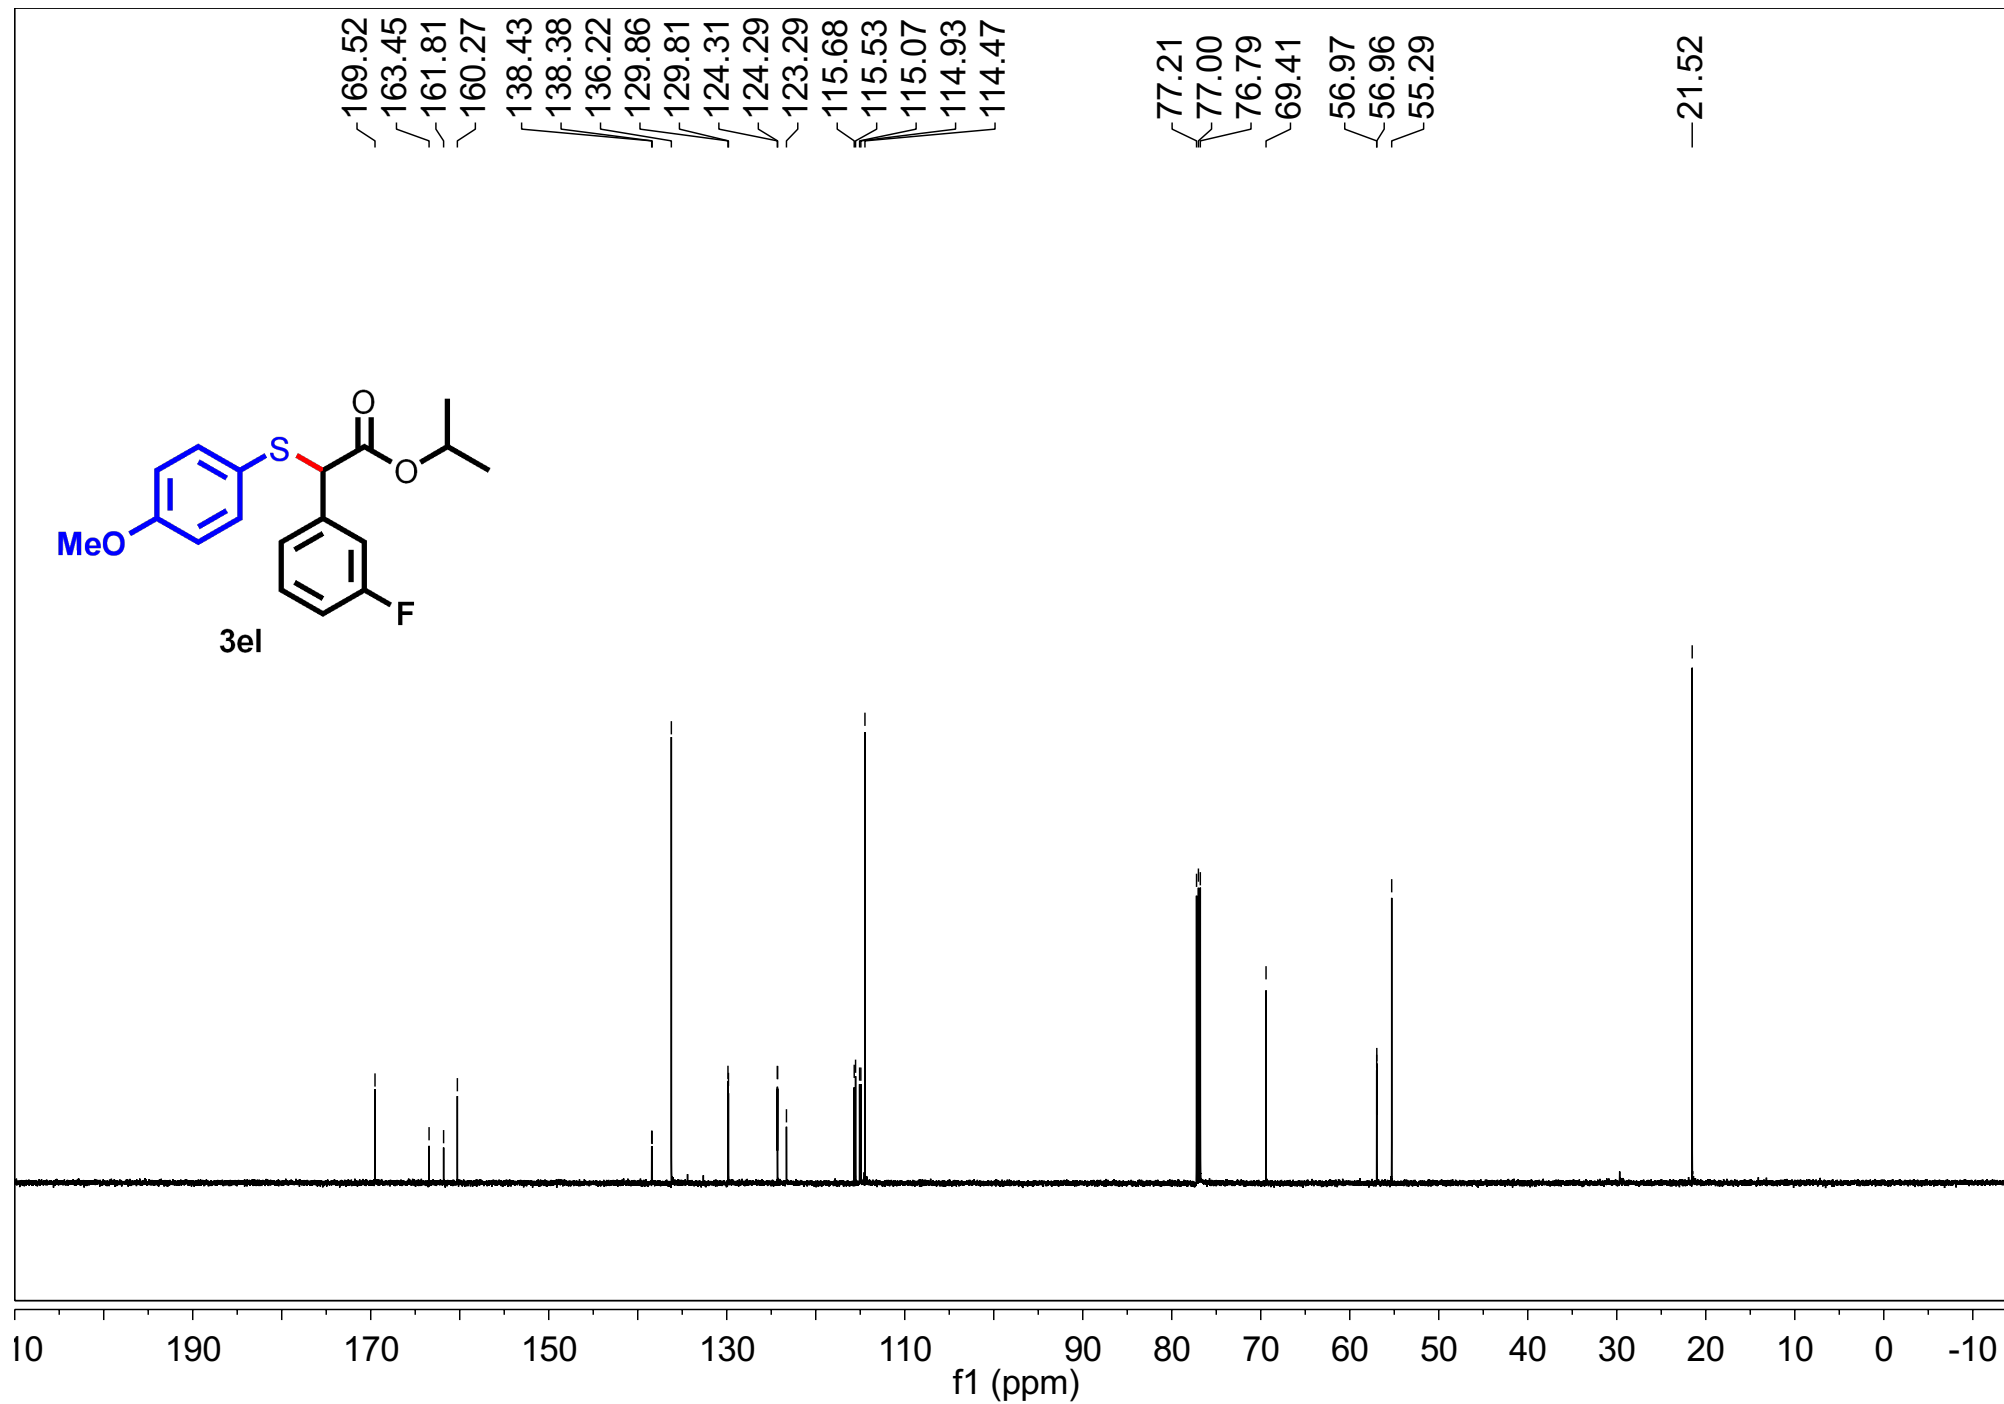

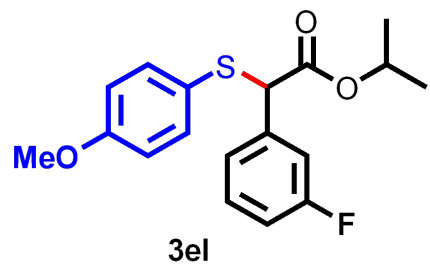

-113.006  
-113.022  
-113.030  
-113.045  
-113.055  
-113.070

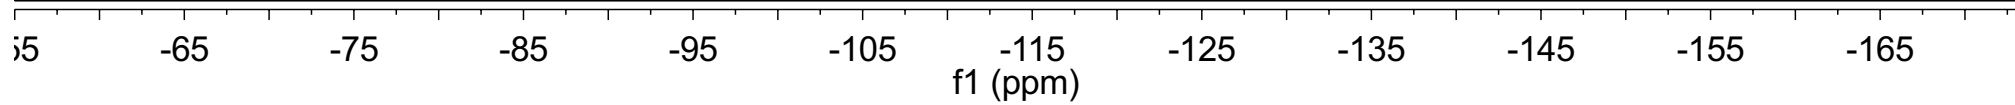

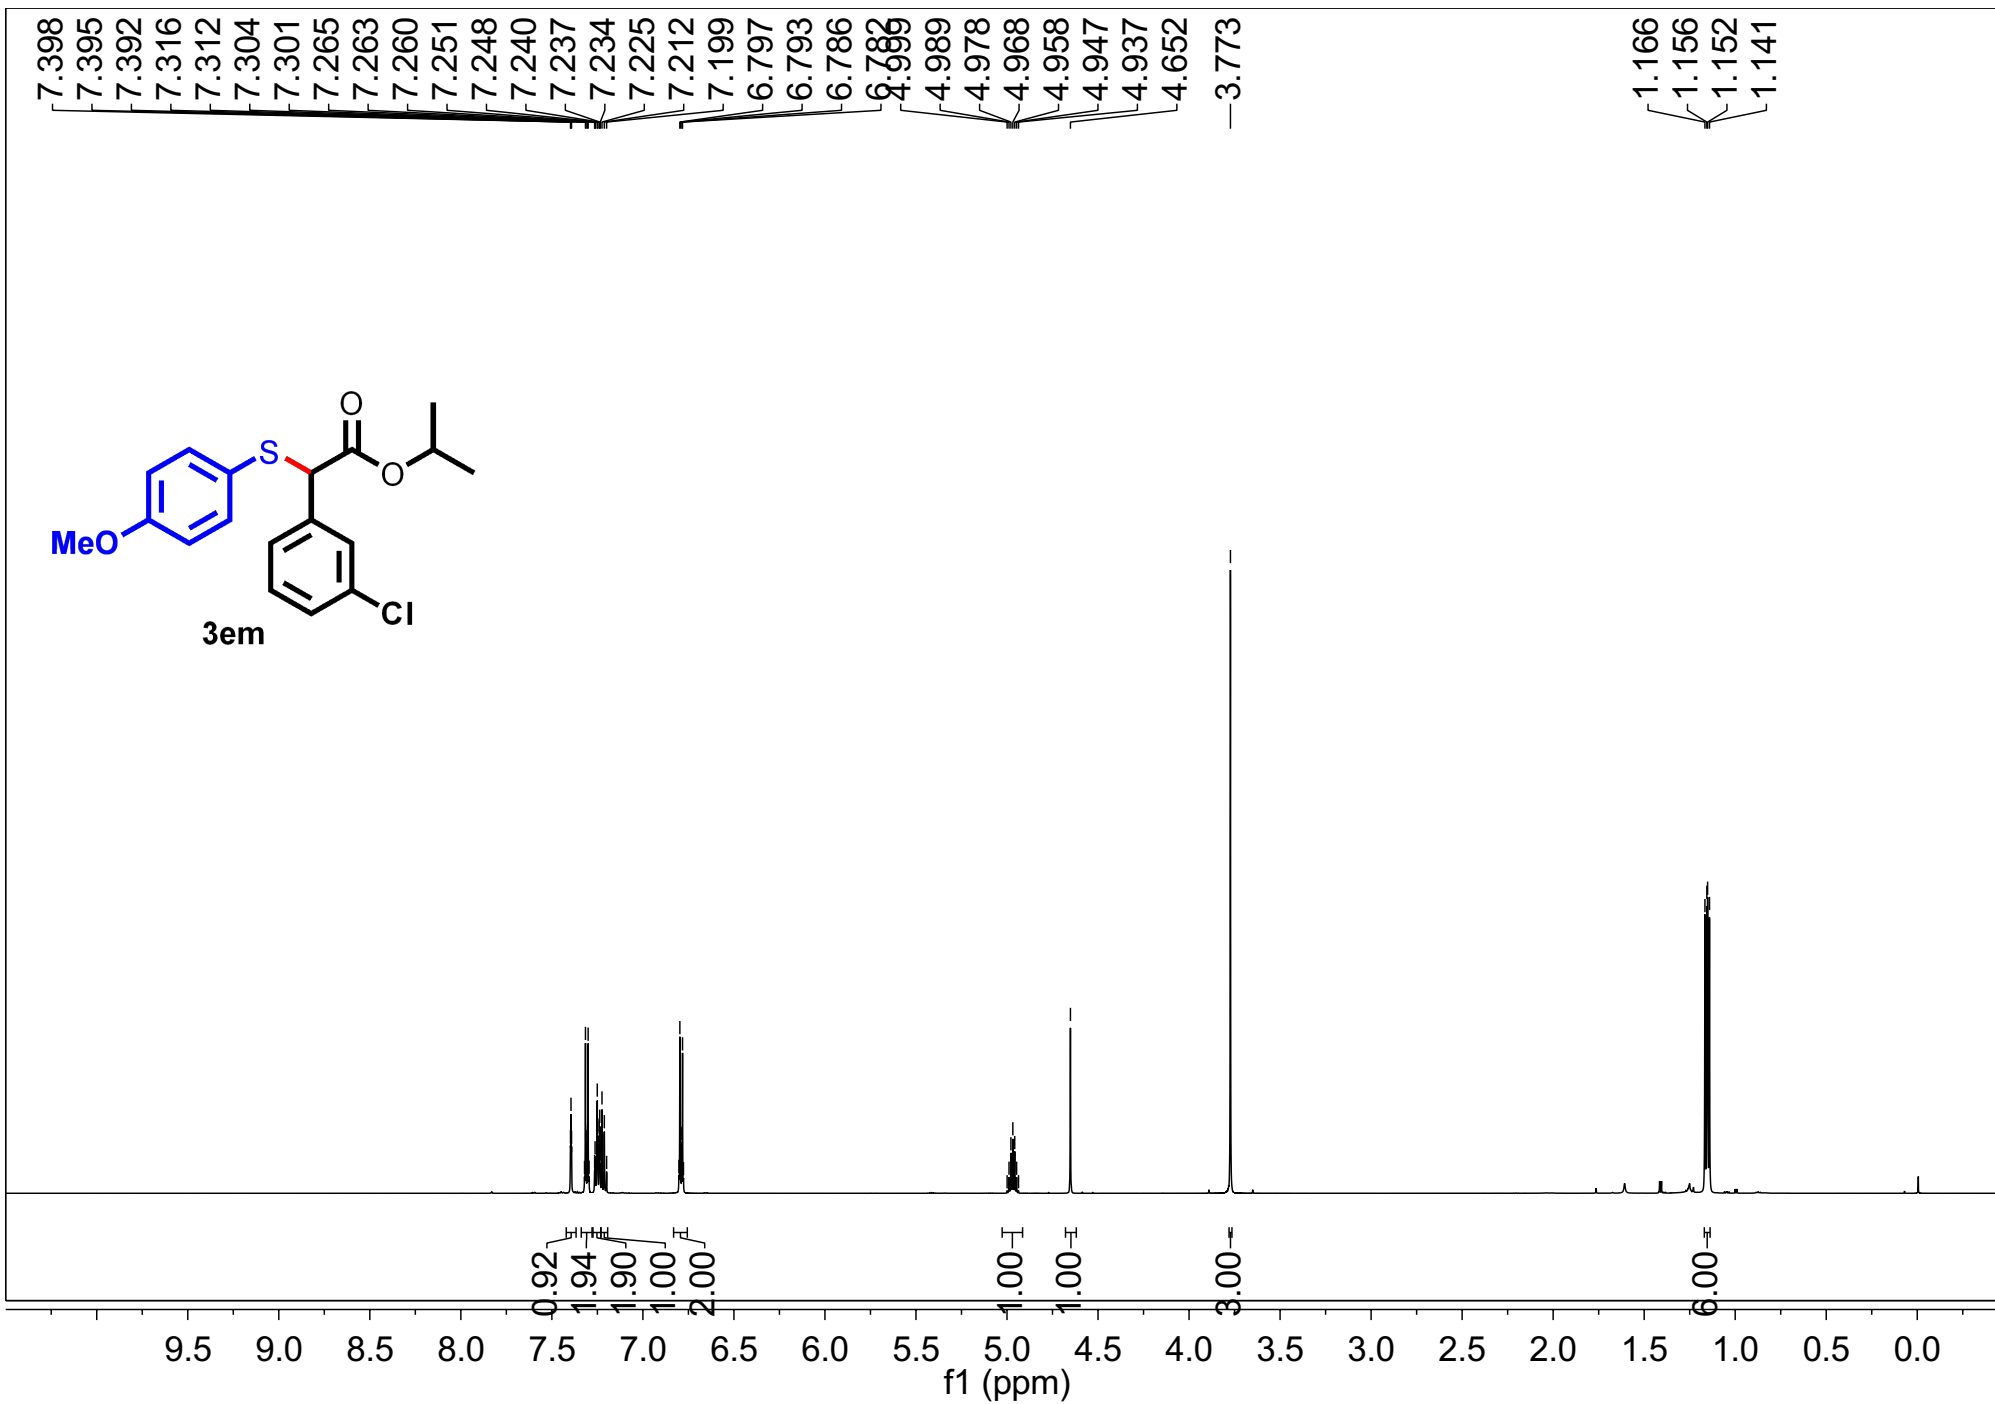

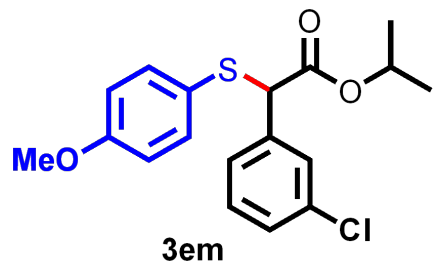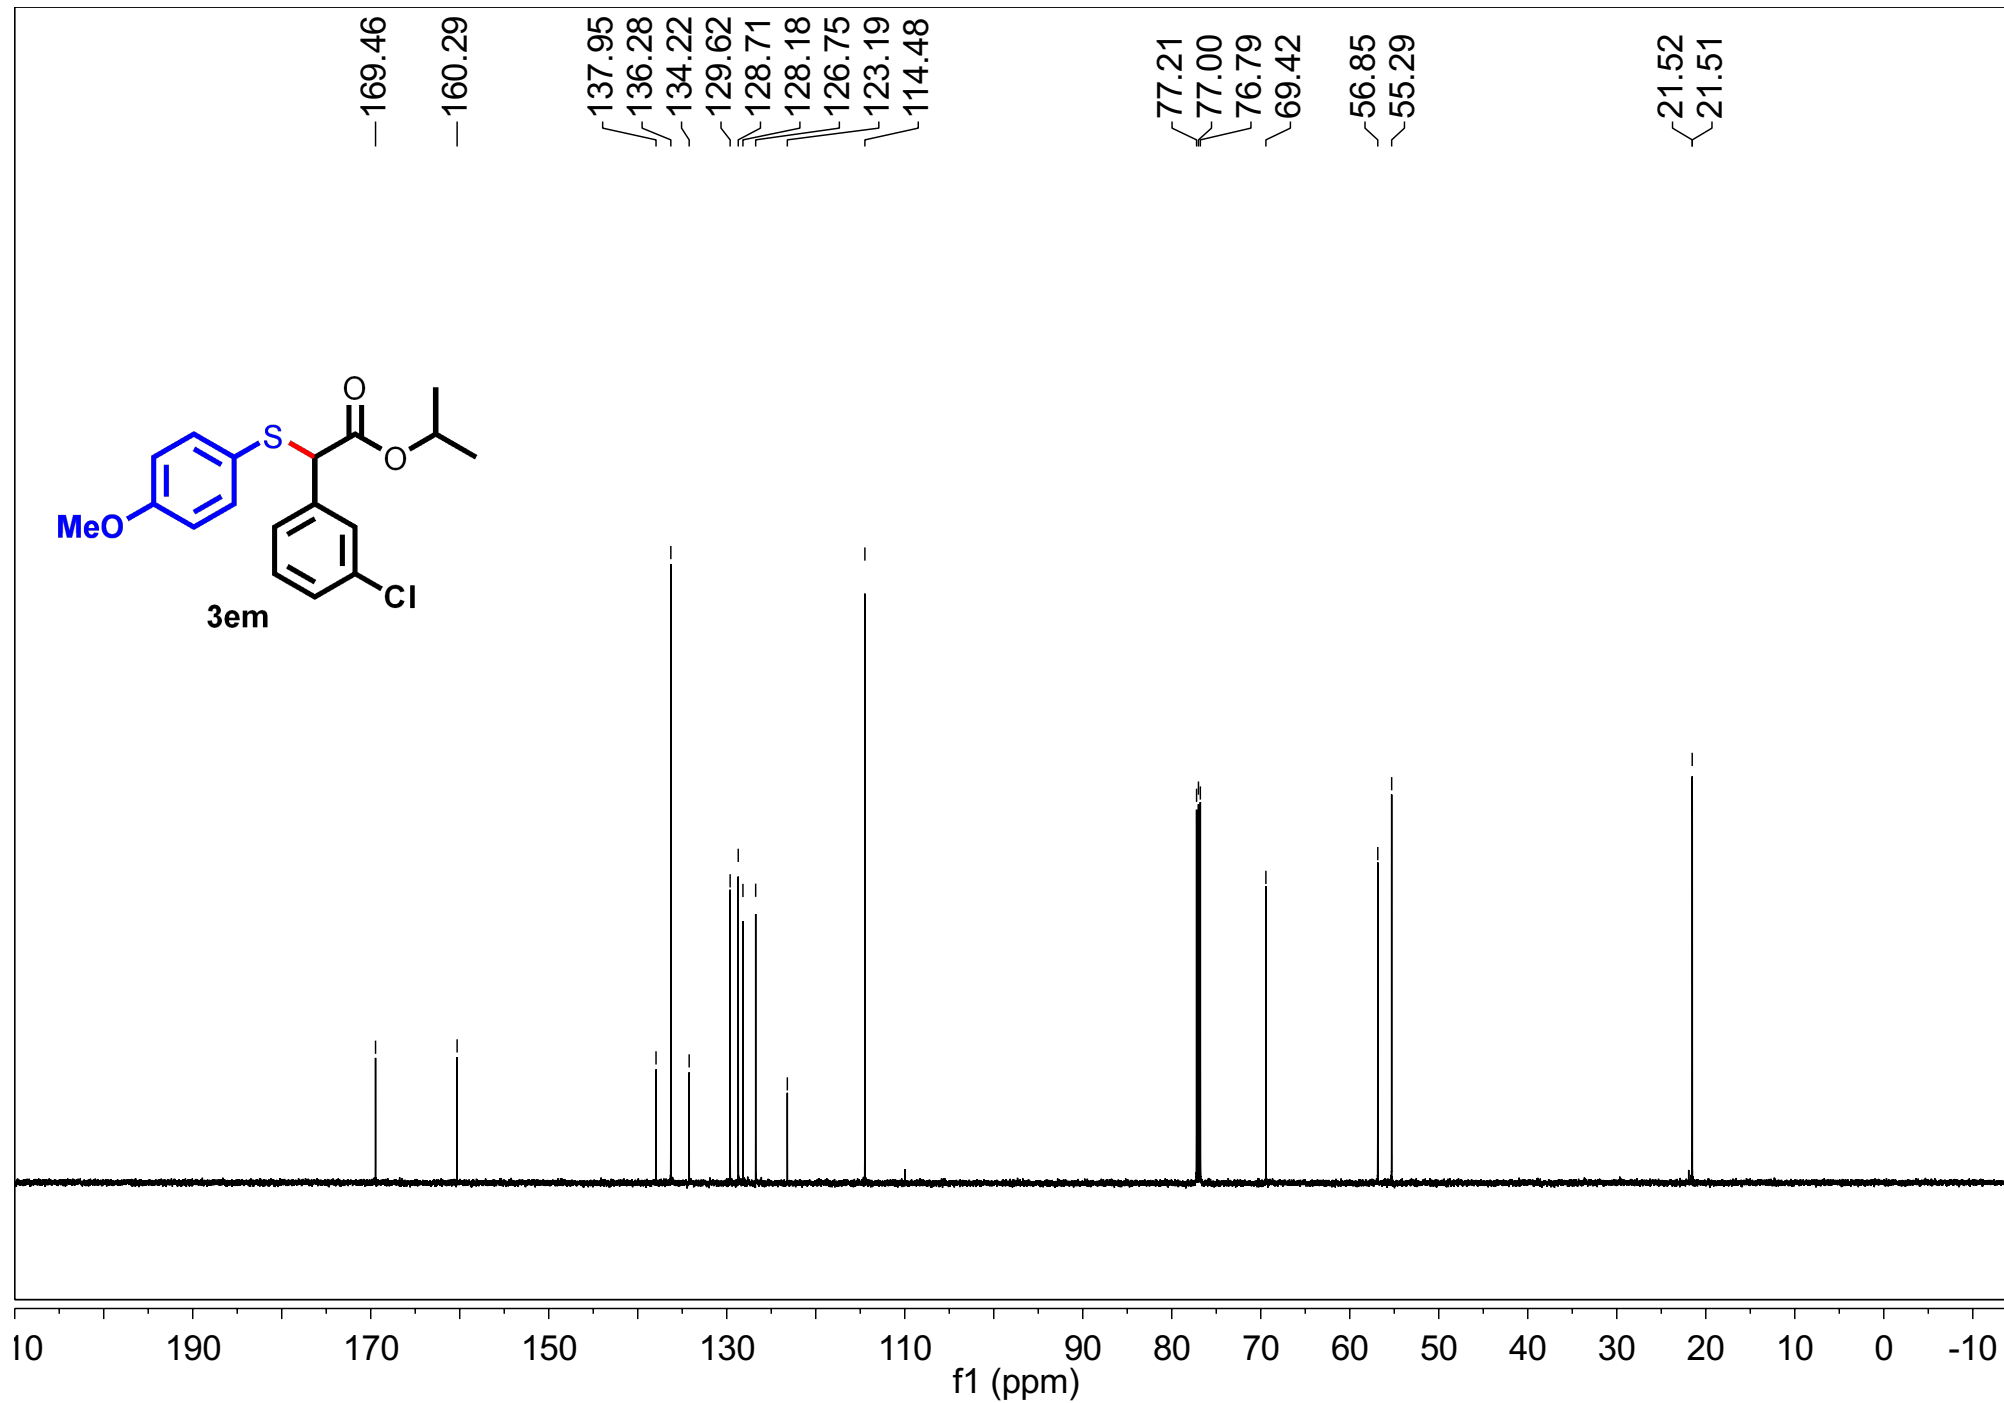



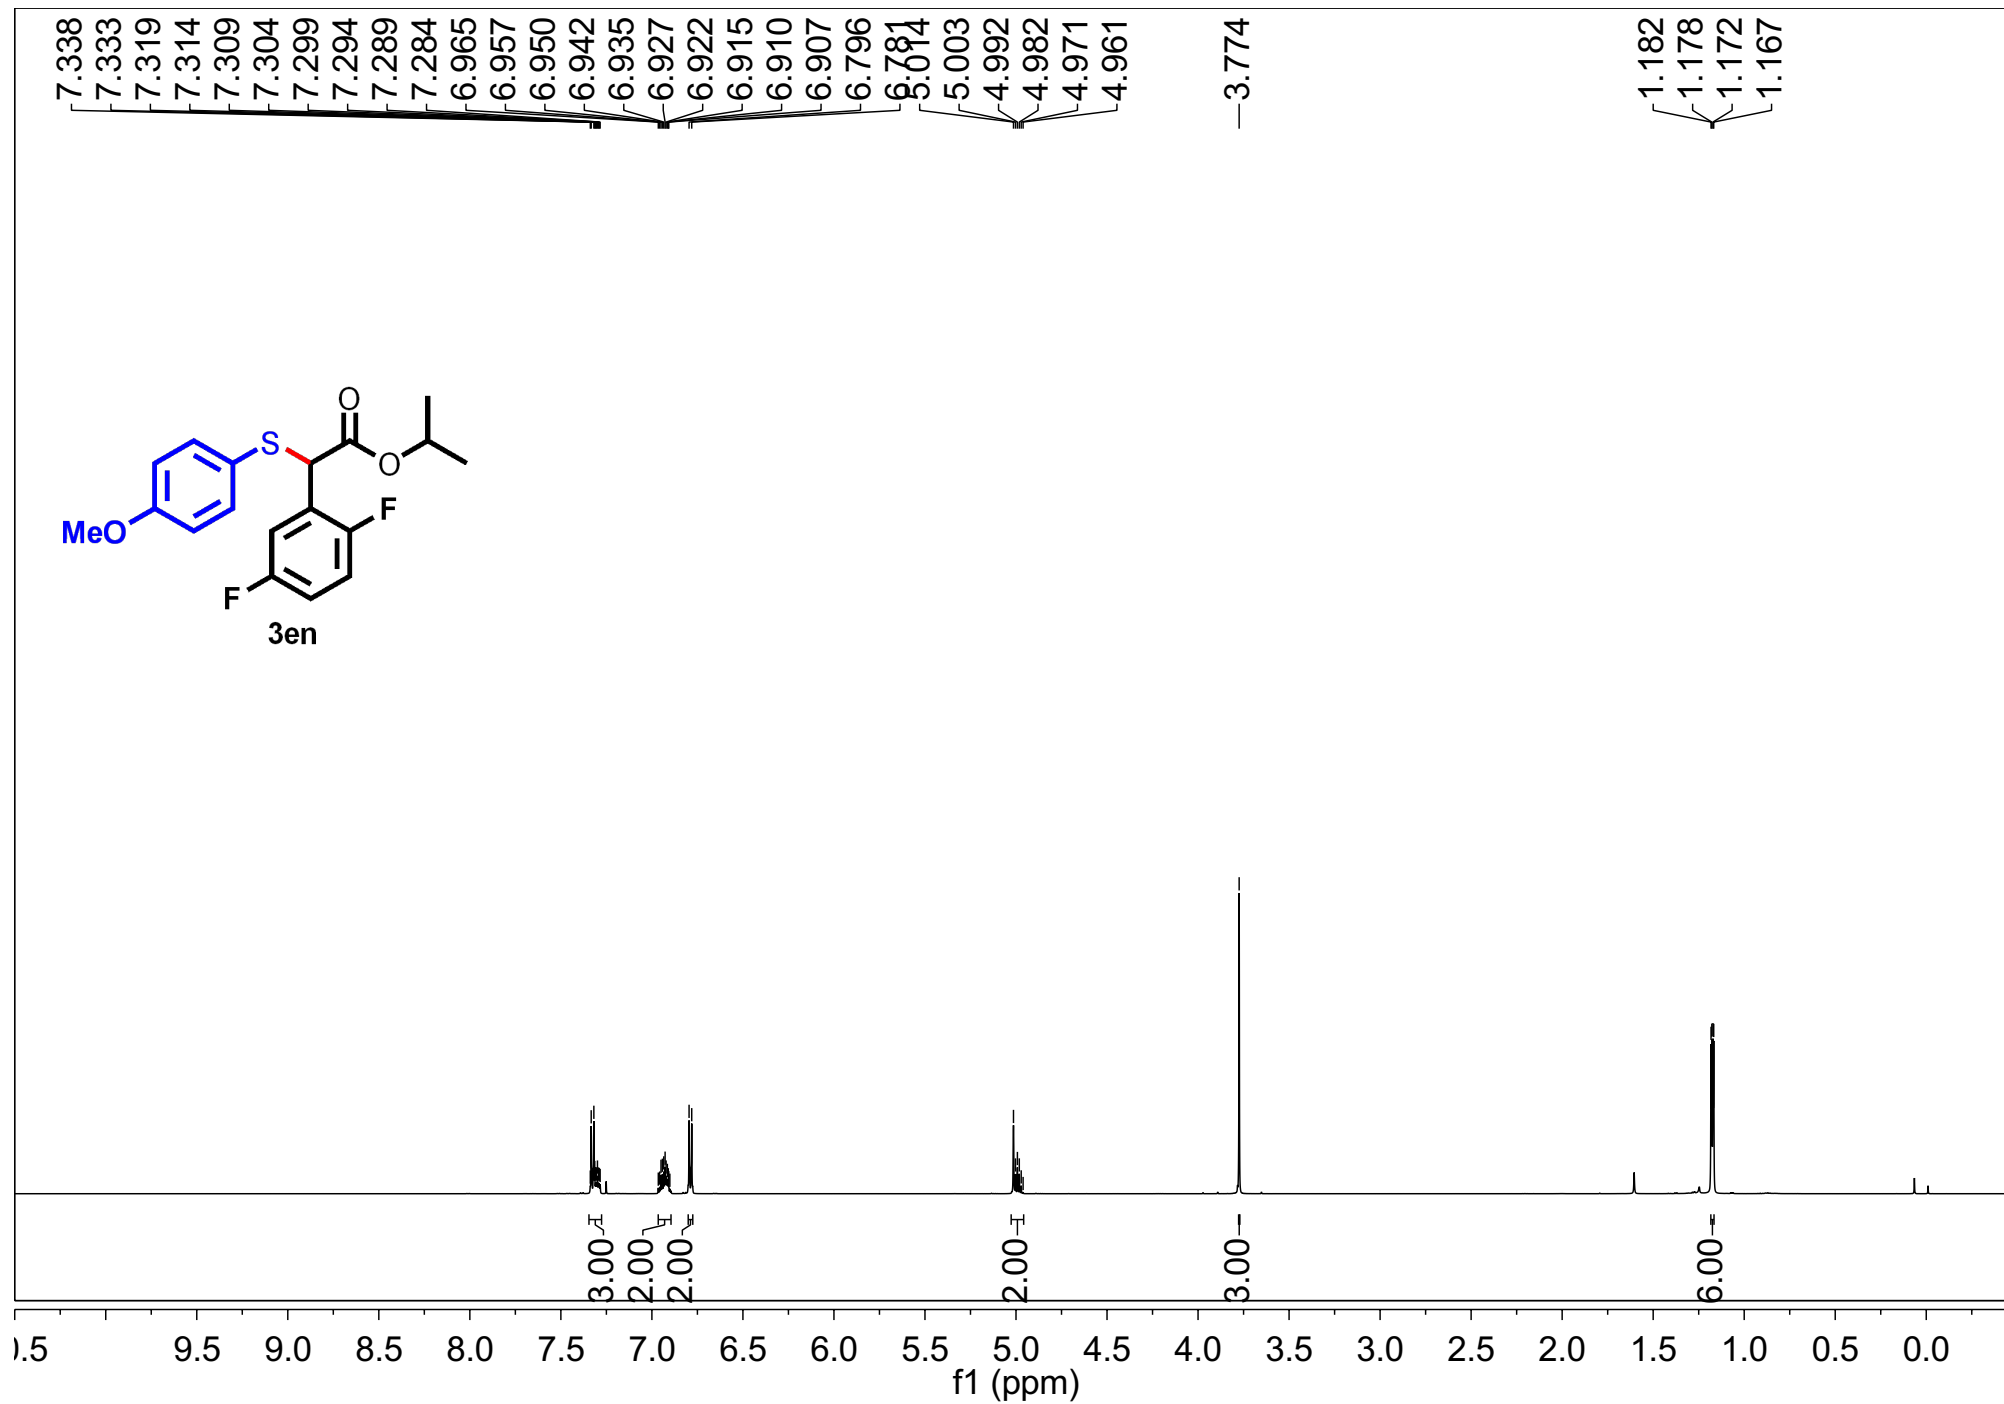

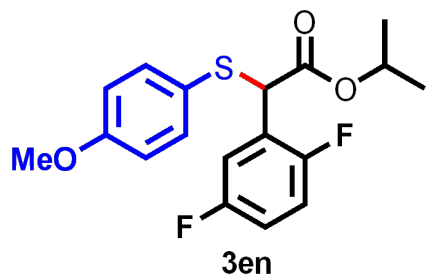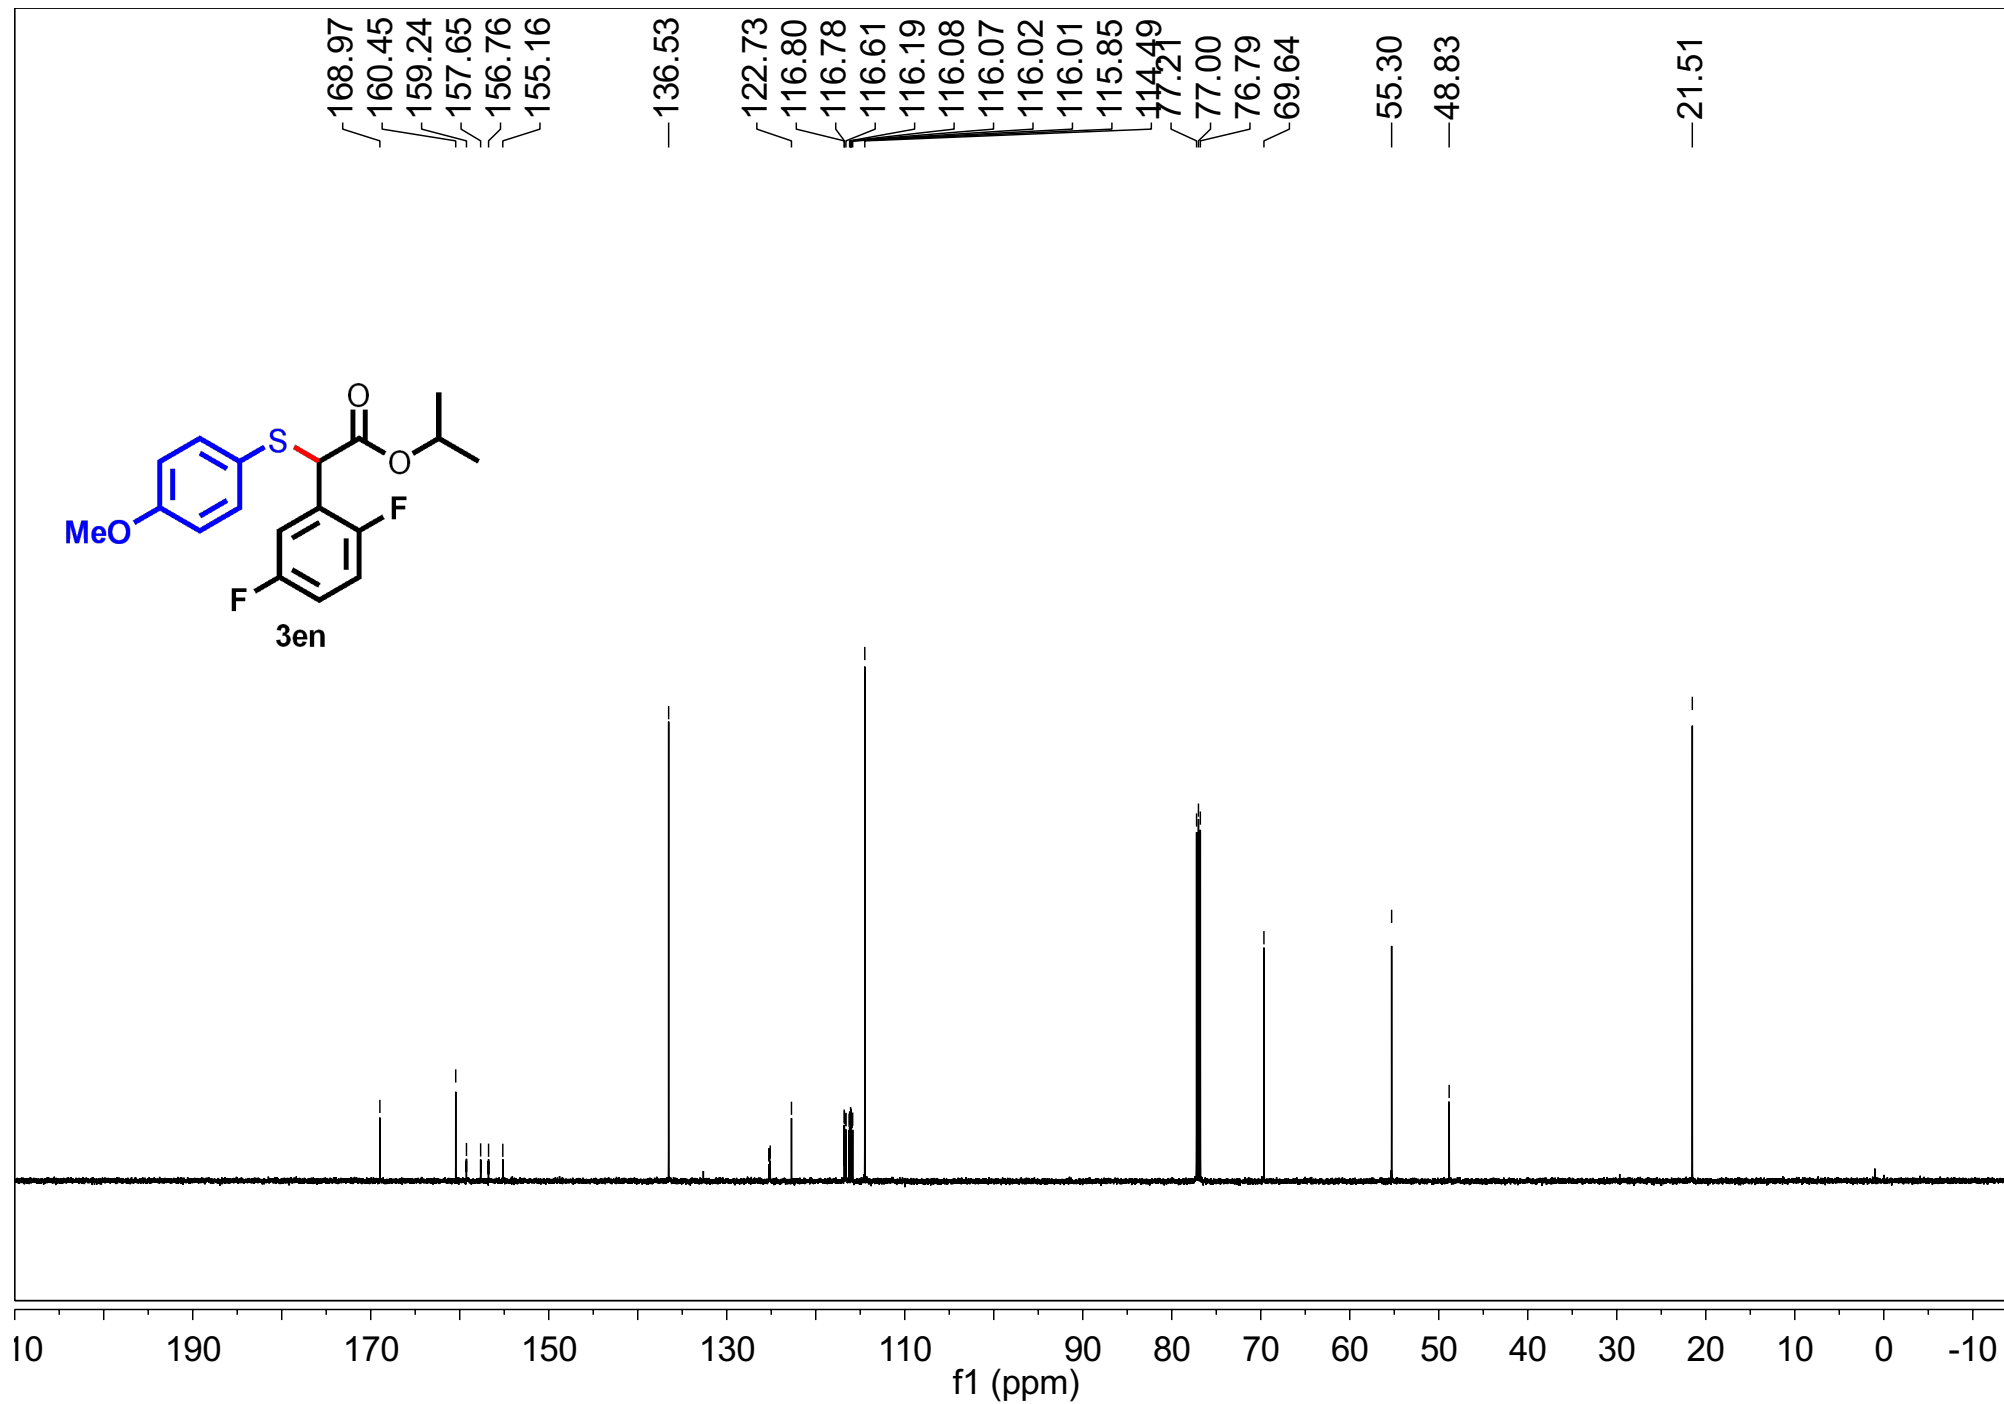

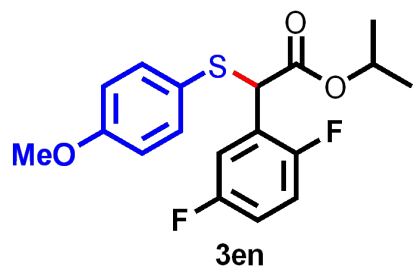

118.312  
118.334  
118.347  
118.357  
118.371  
118.393  
123.948  
123.962  
123.970  
123.975  
123.984  
123.996  
124.008  
124.019  
124.031  
124.044

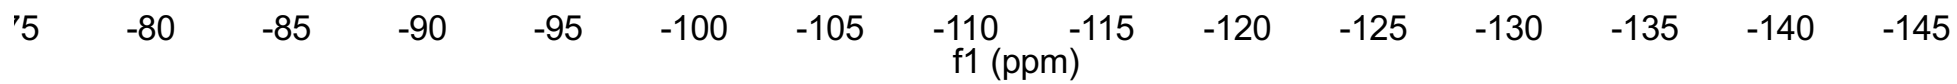

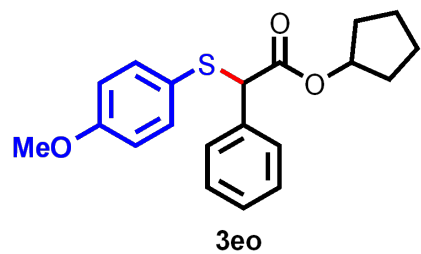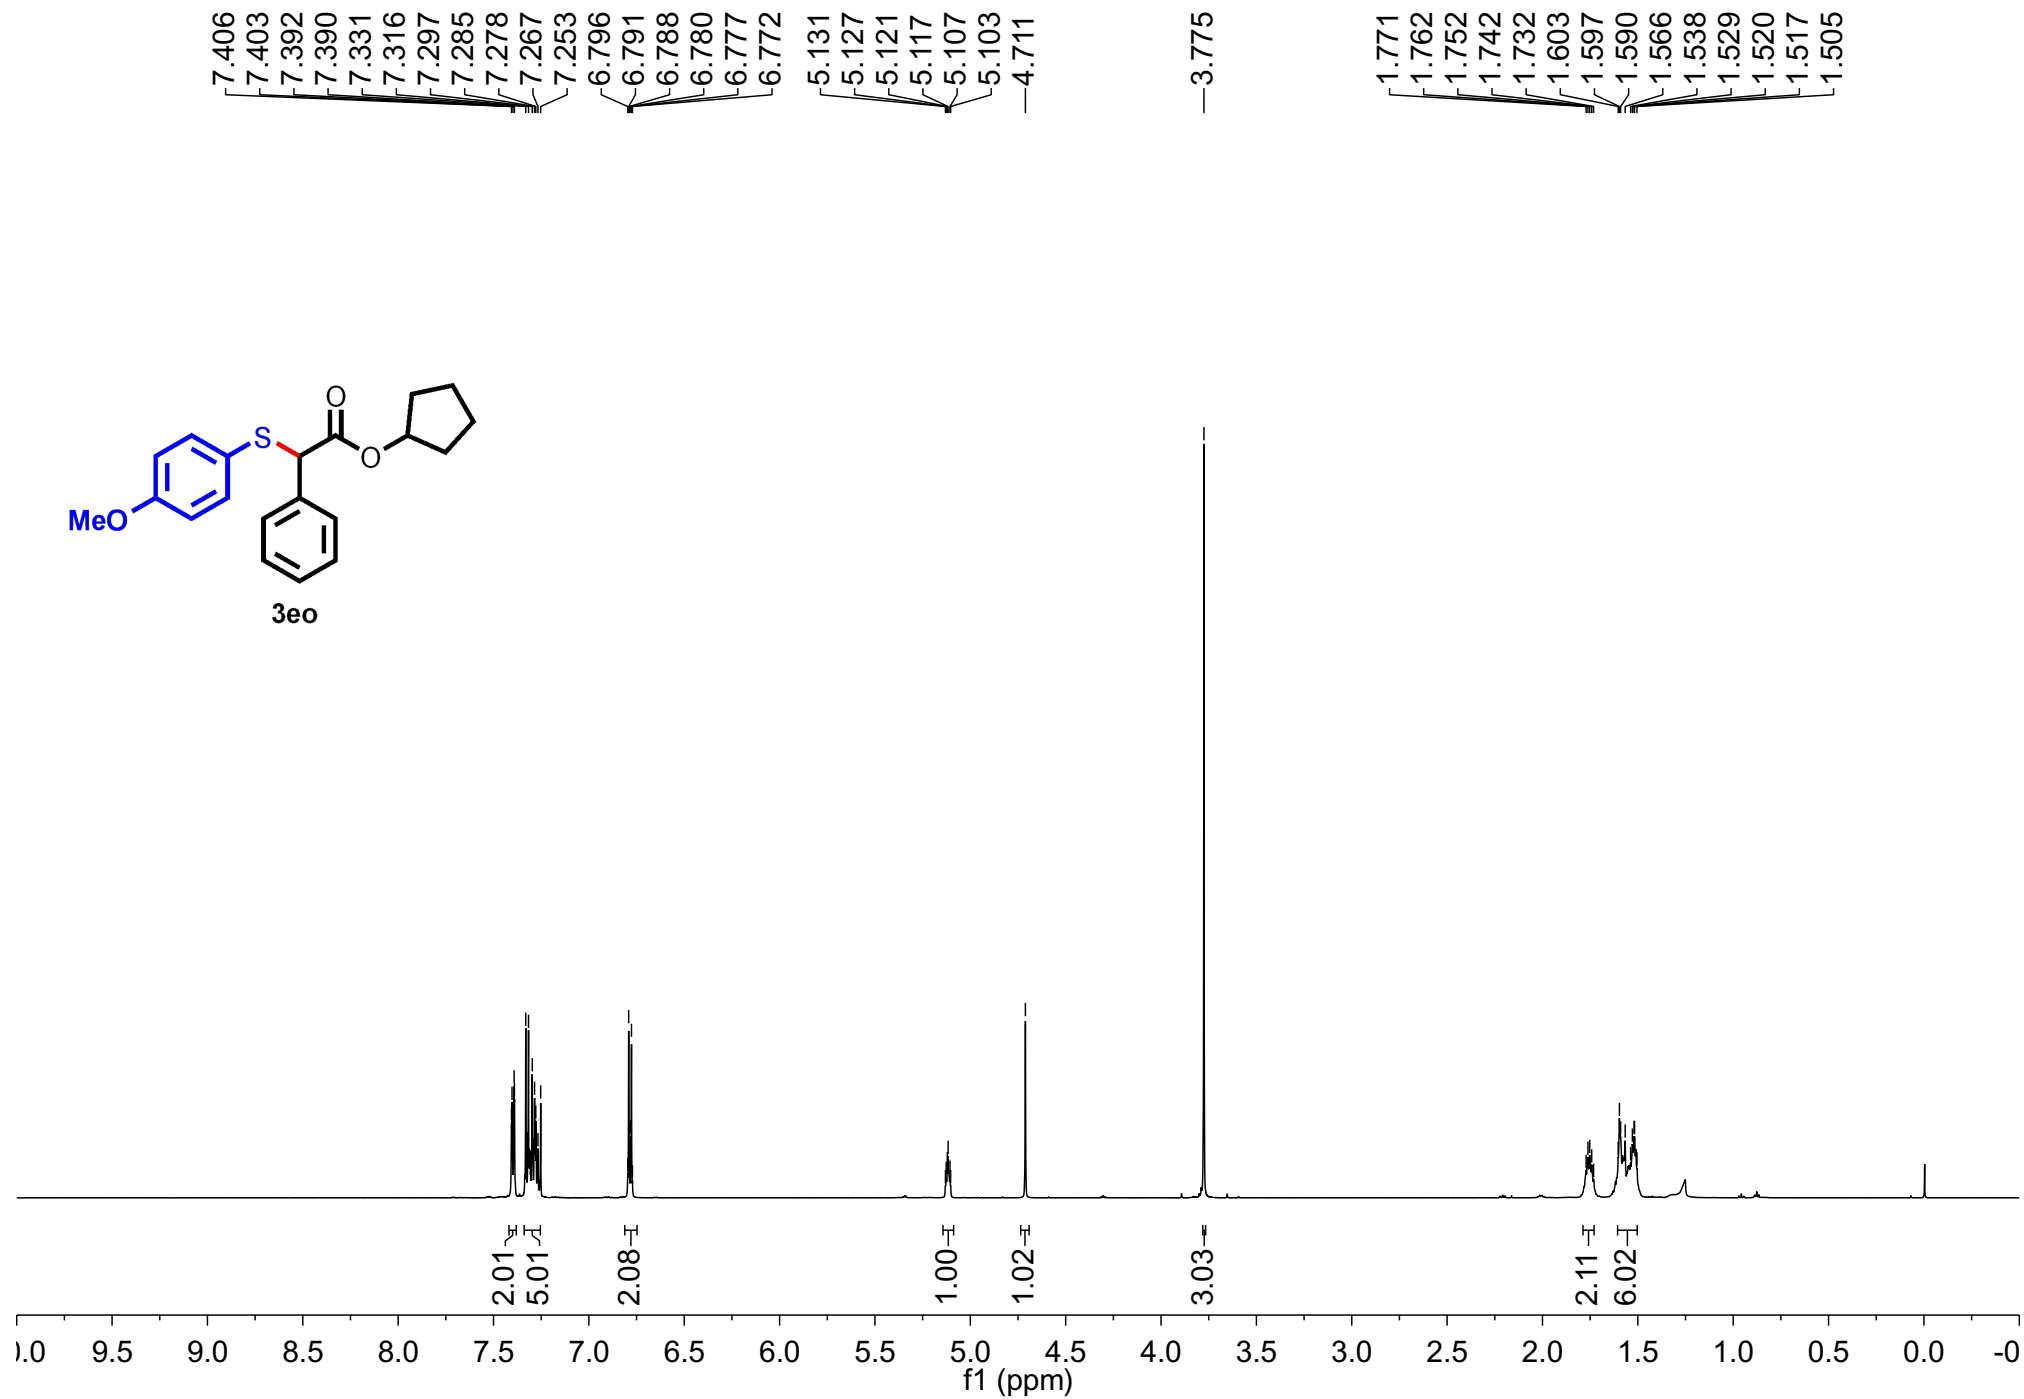

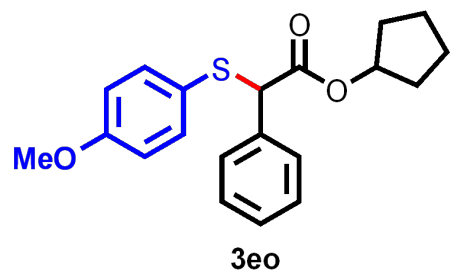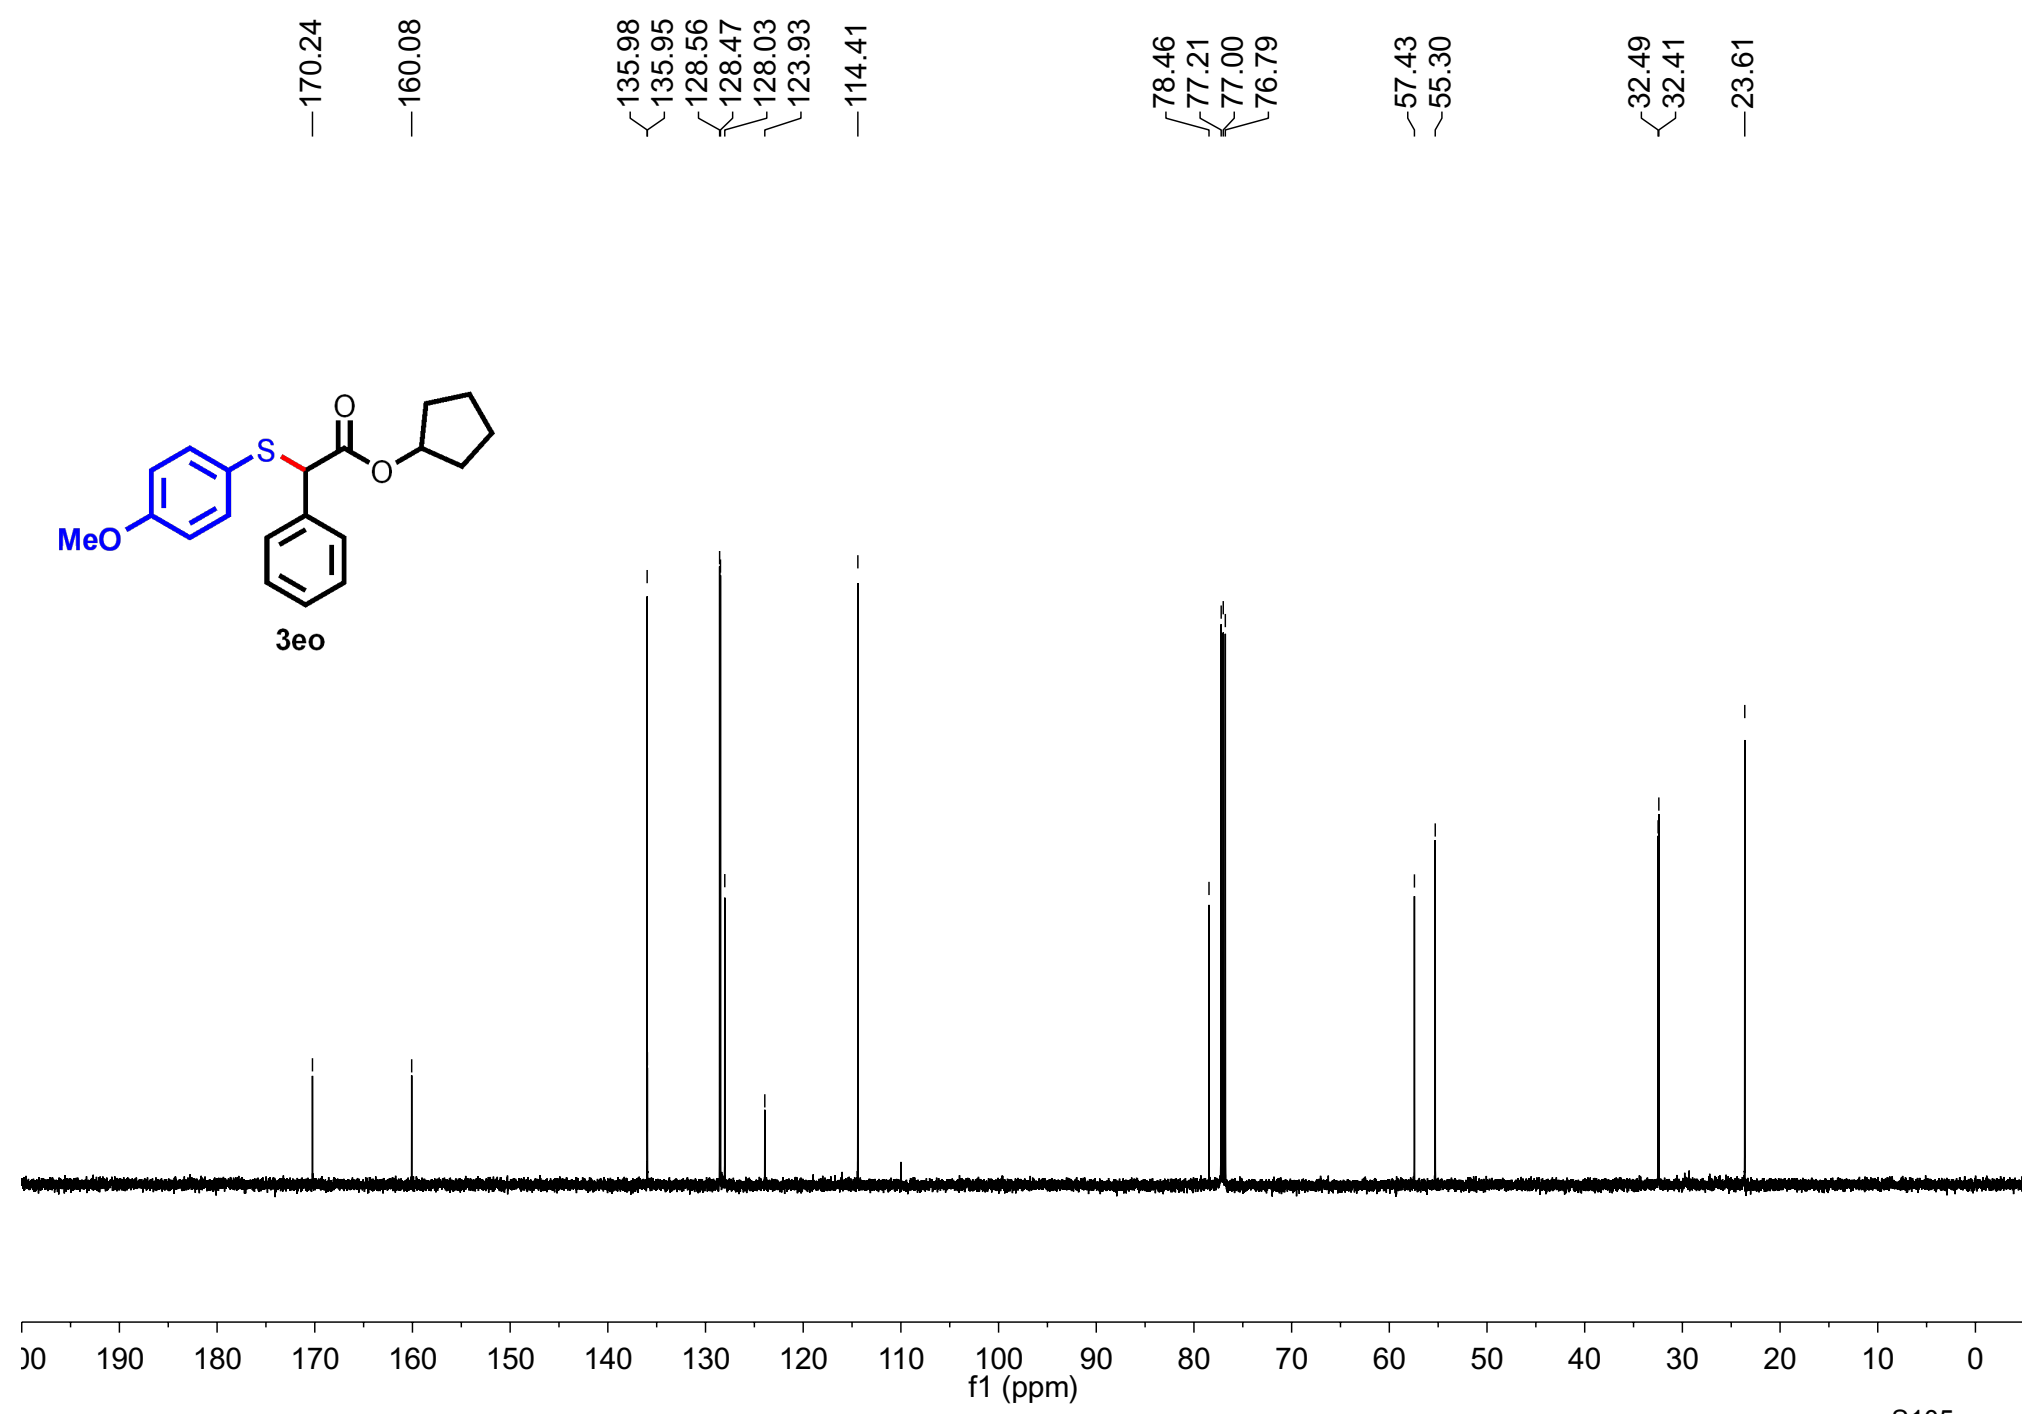

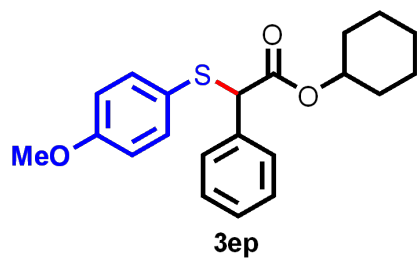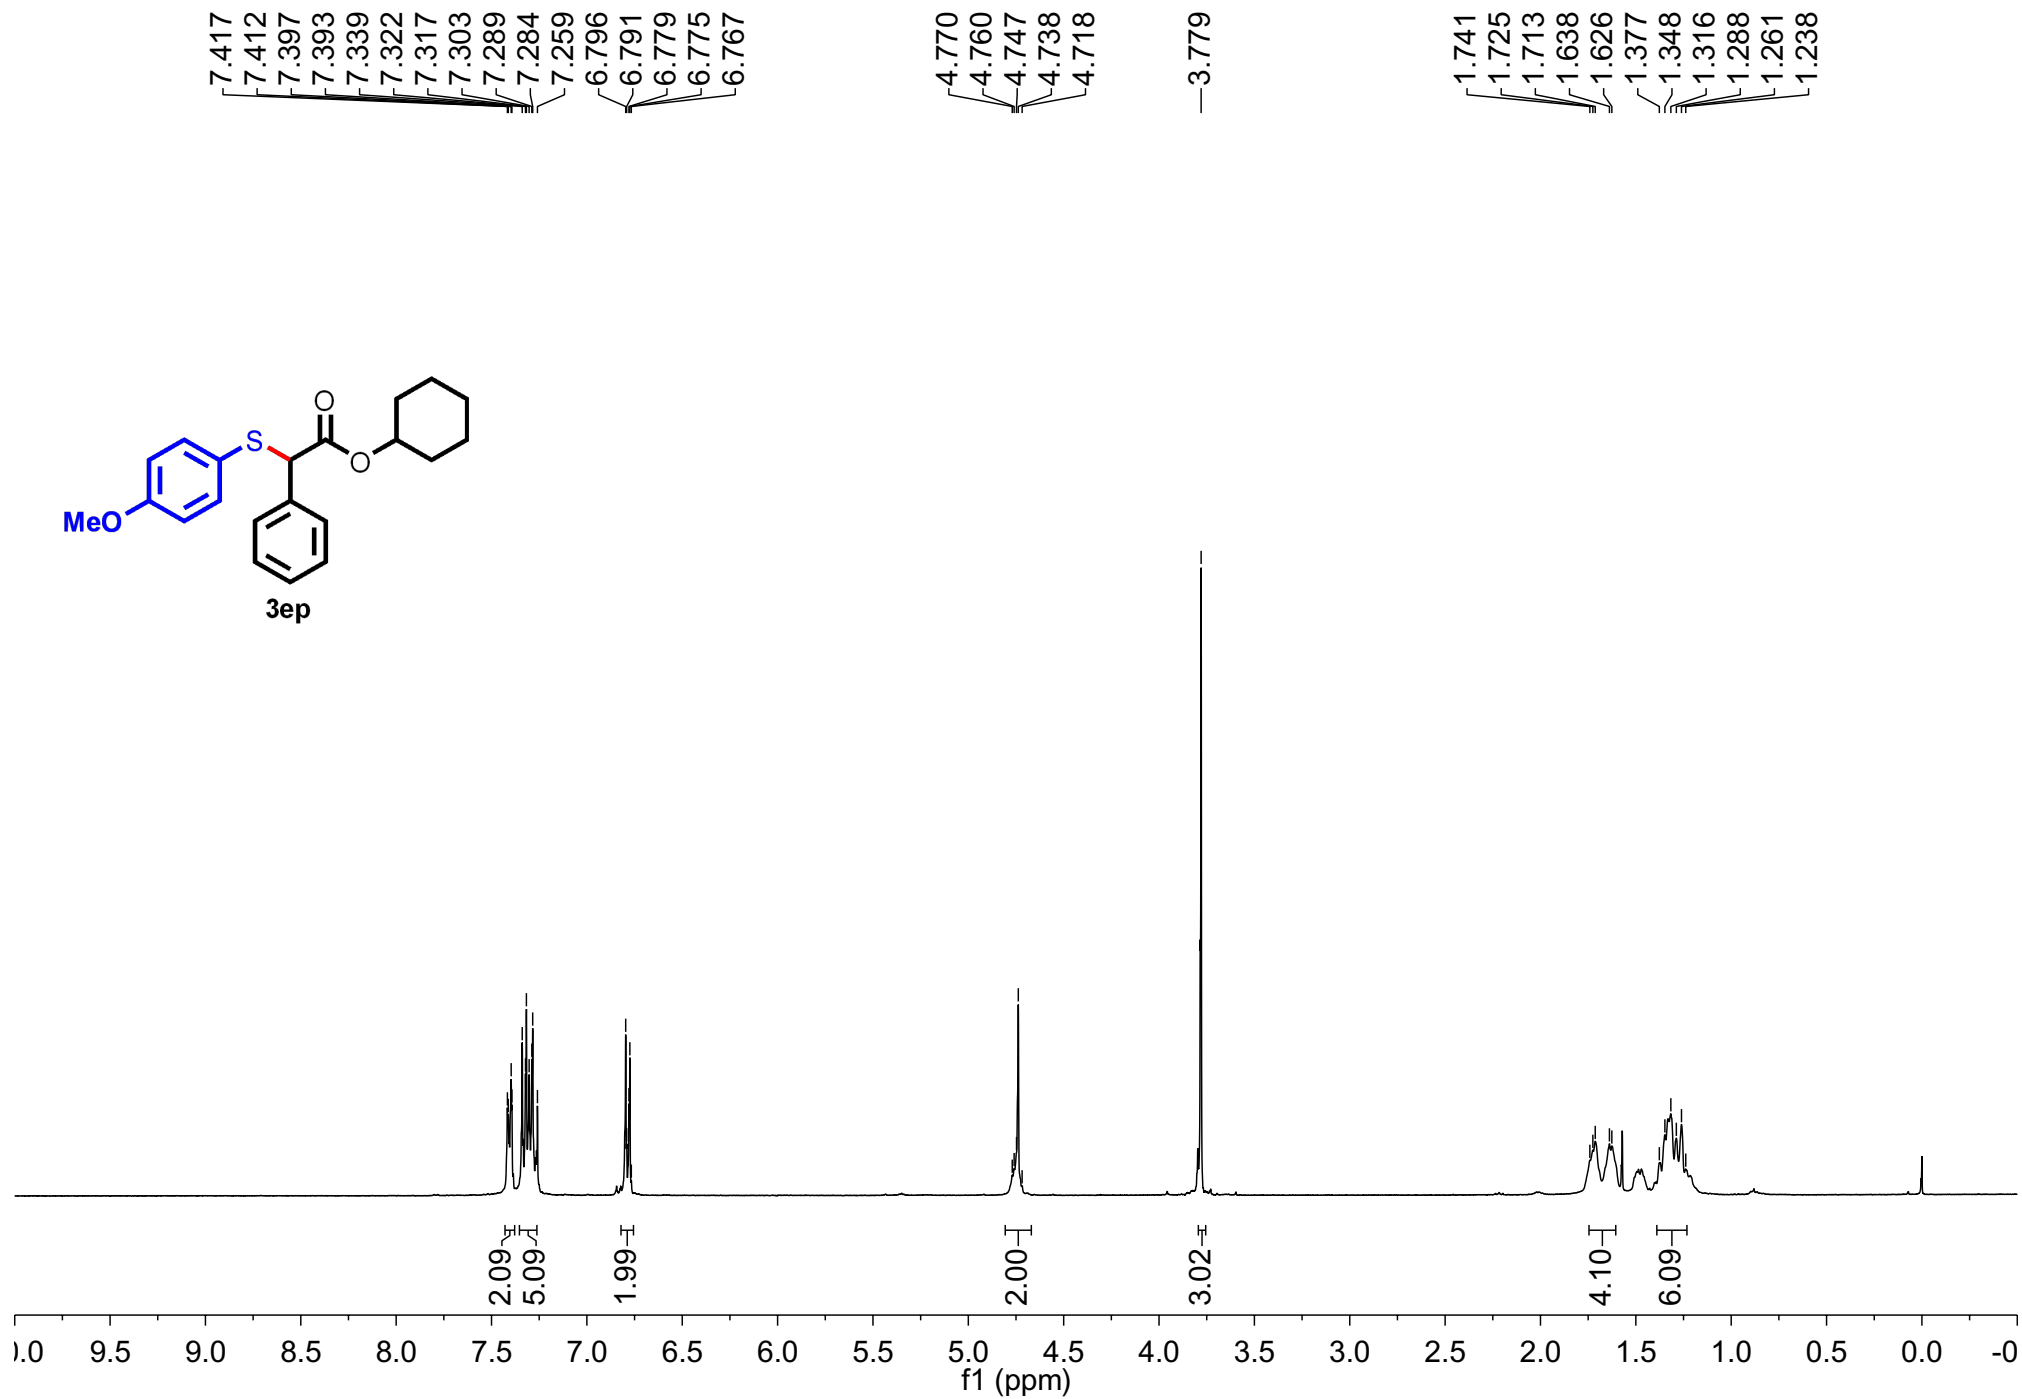

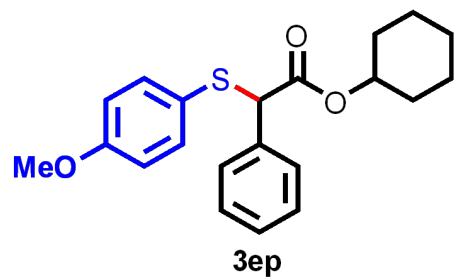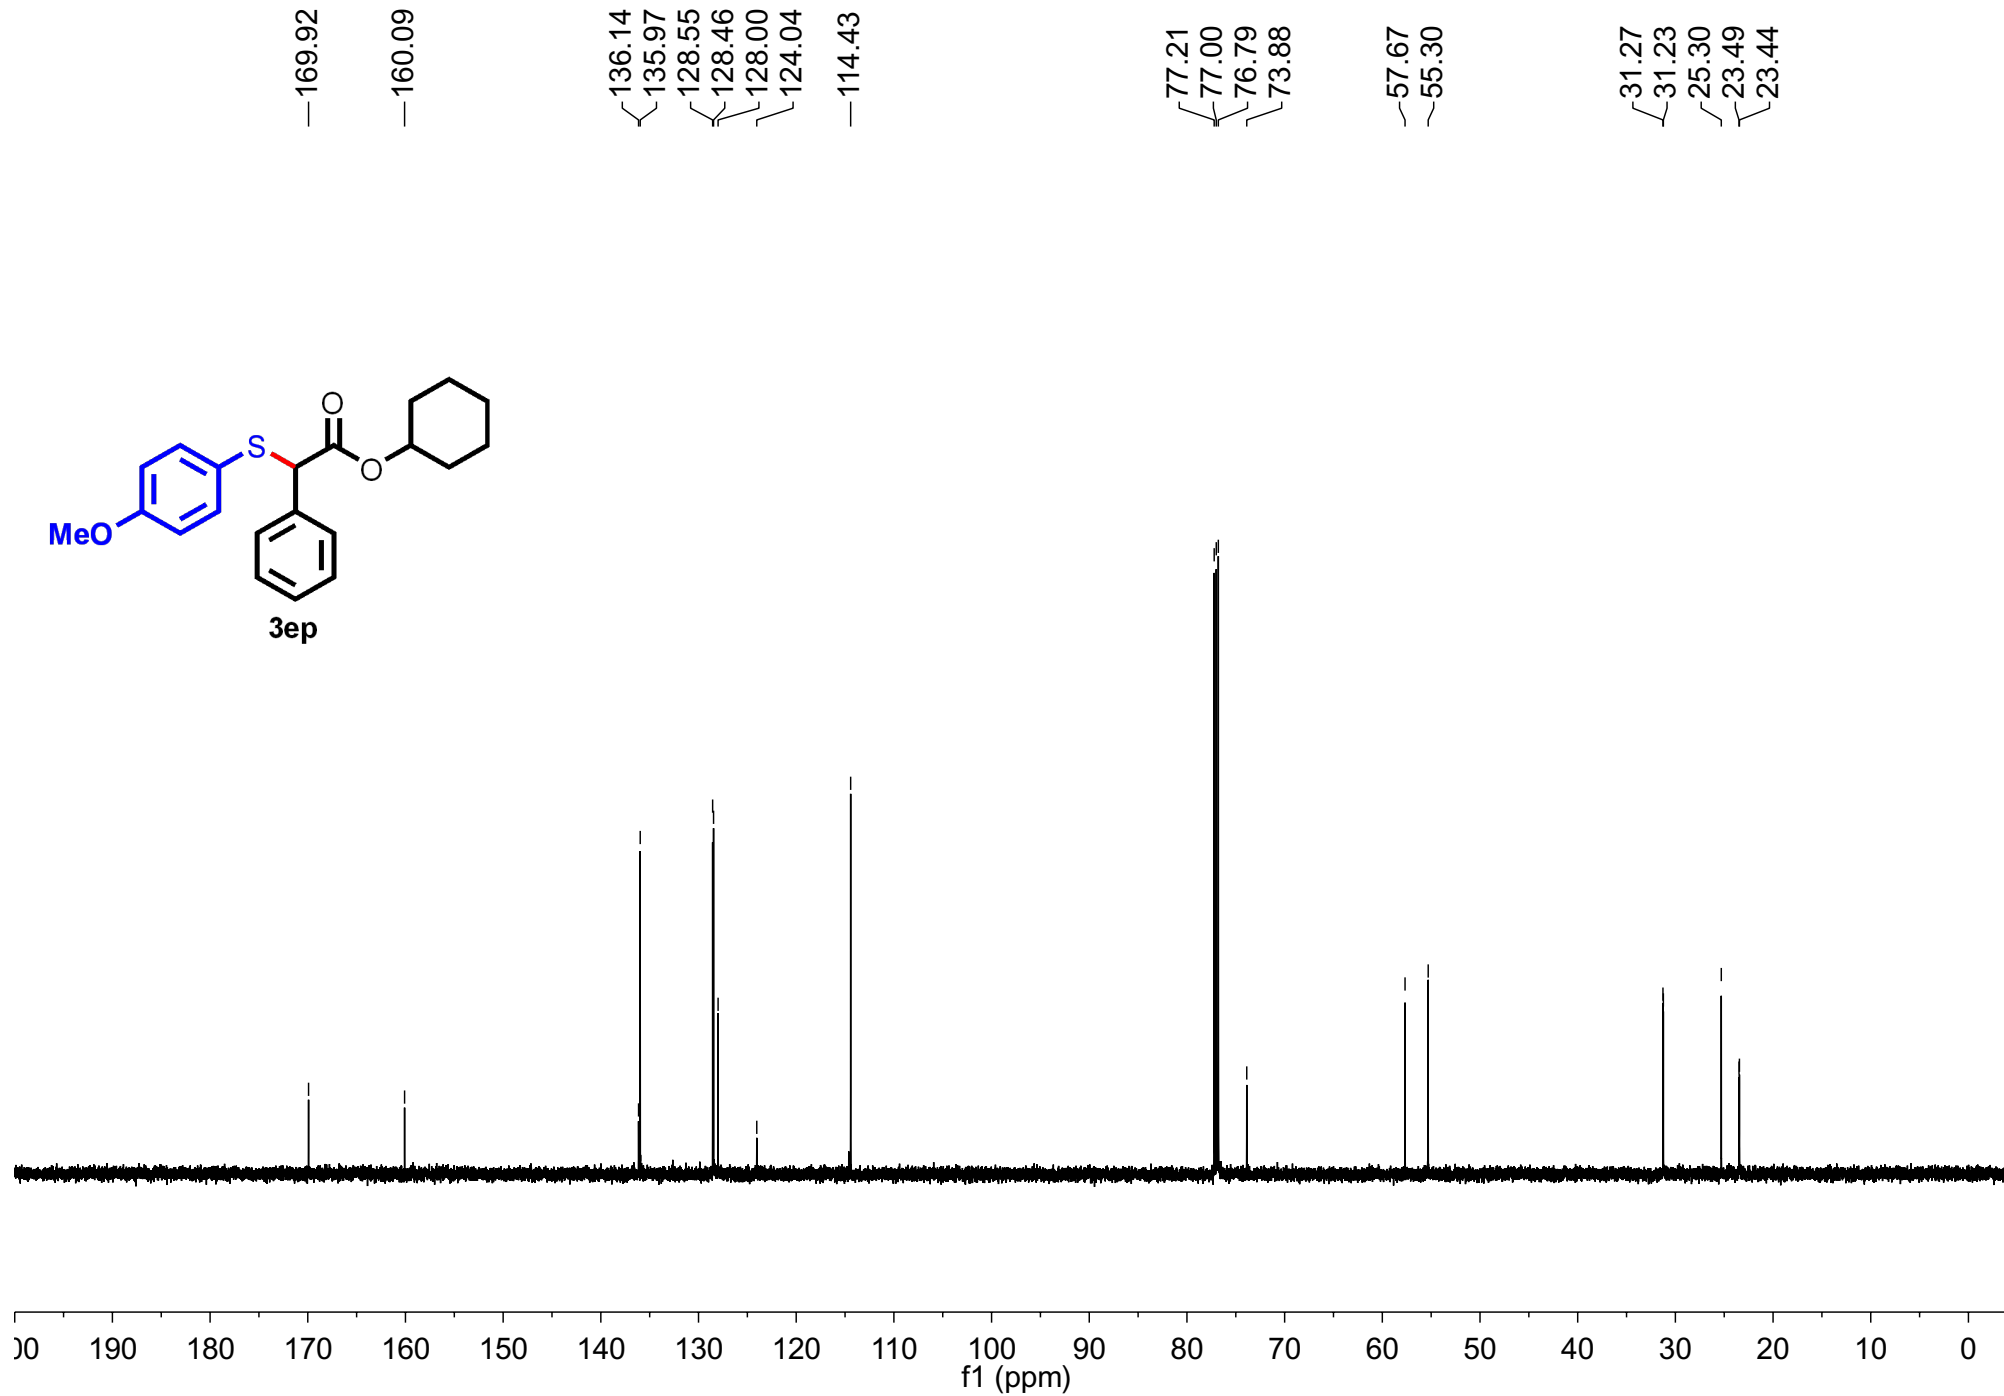

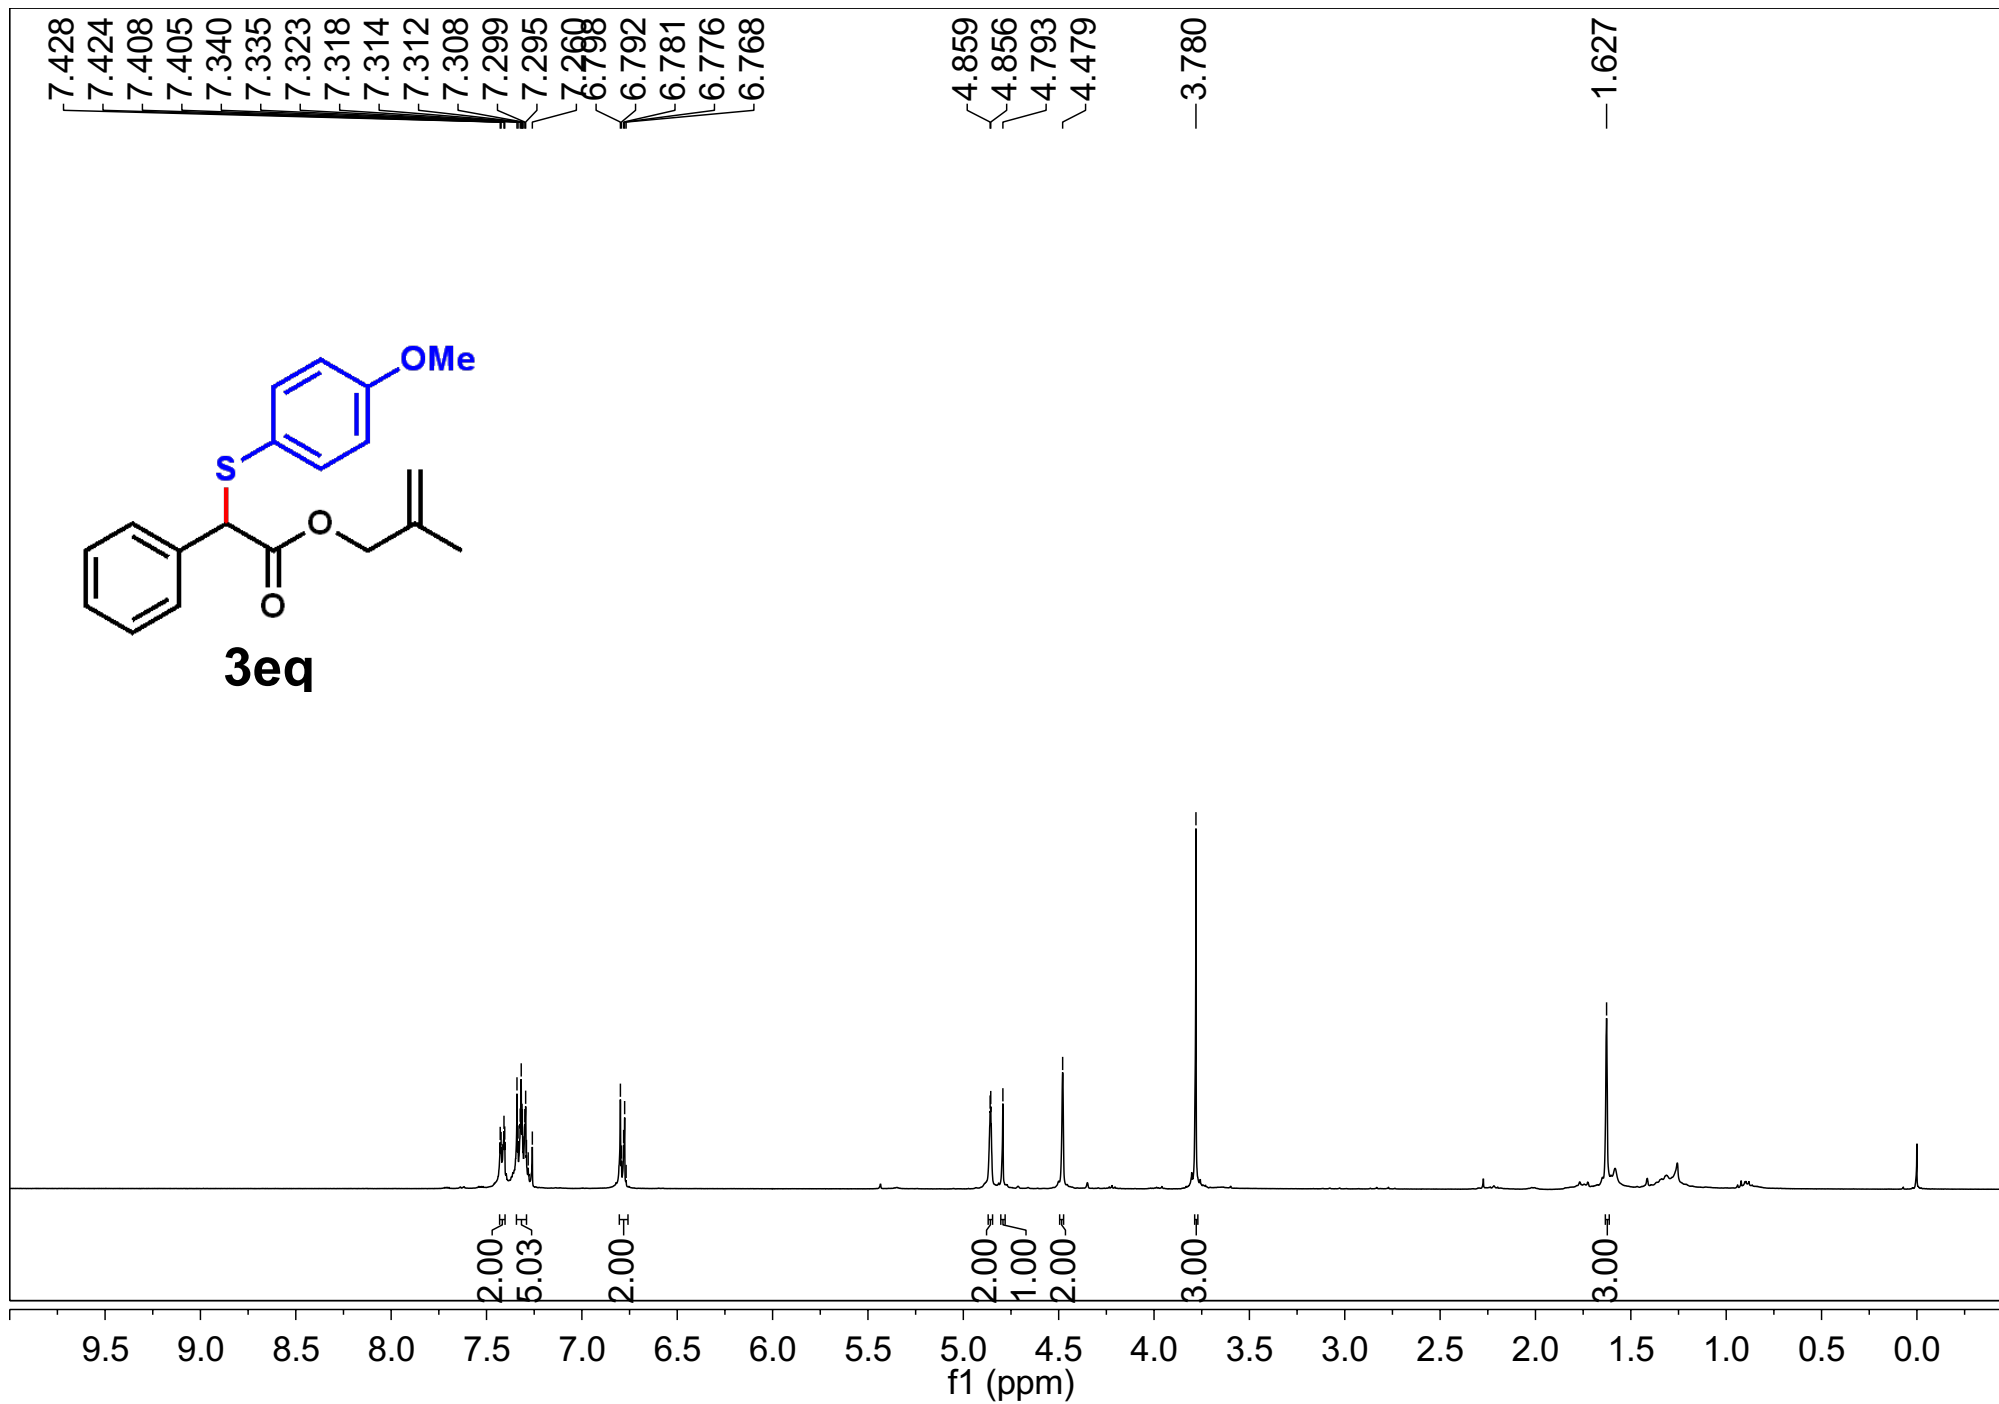



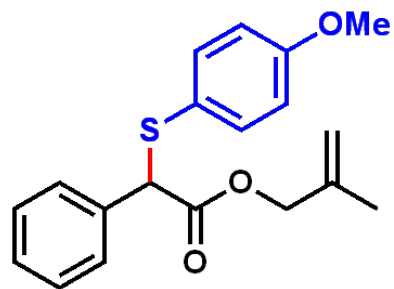

3eq

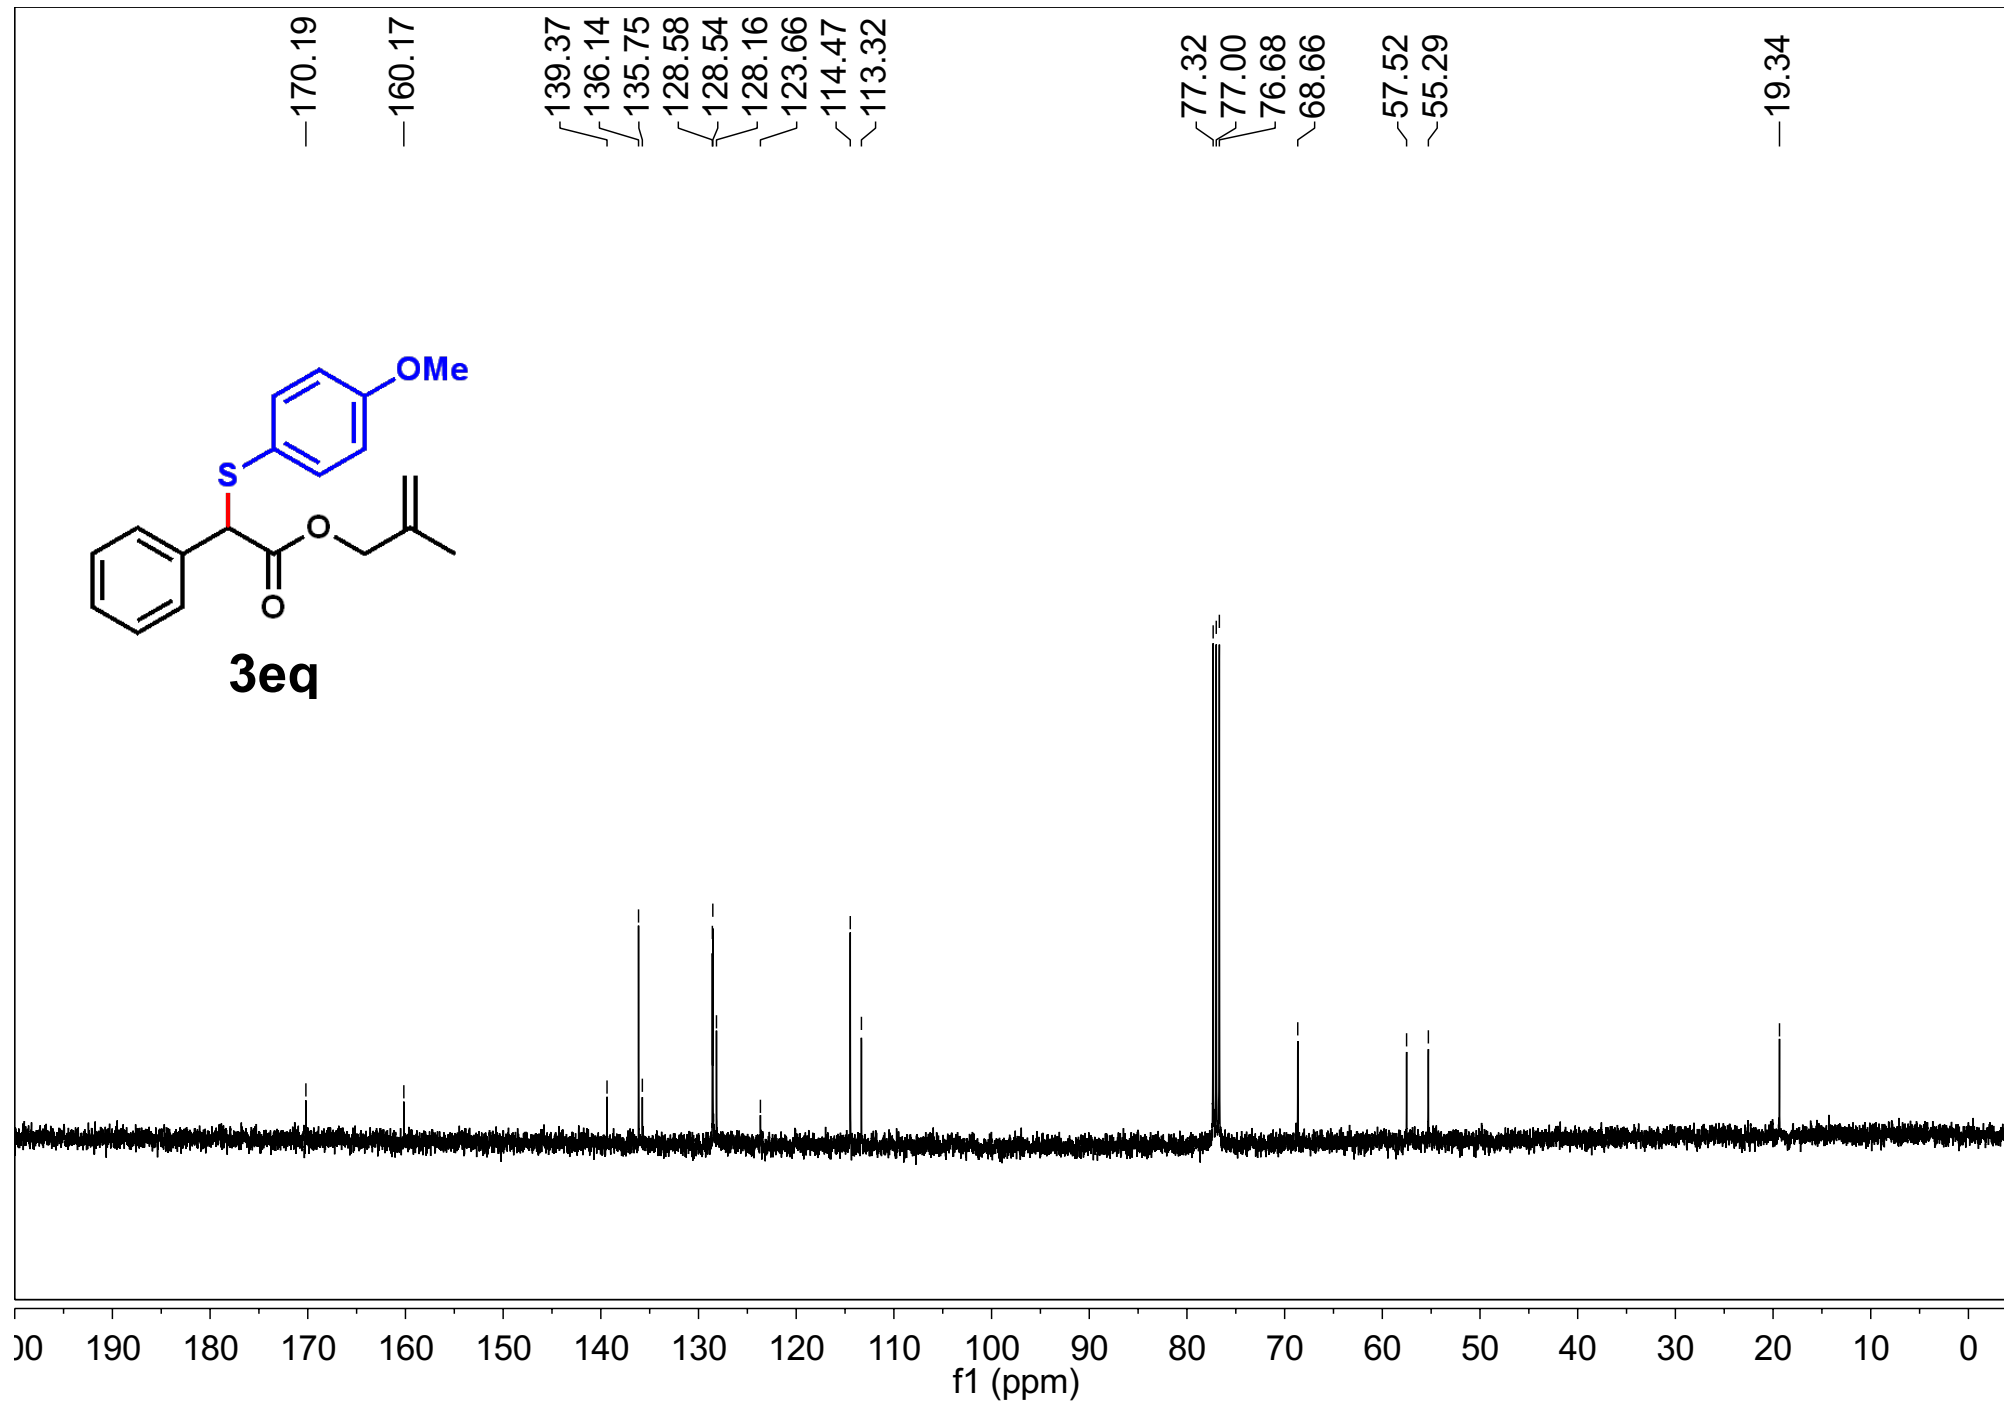

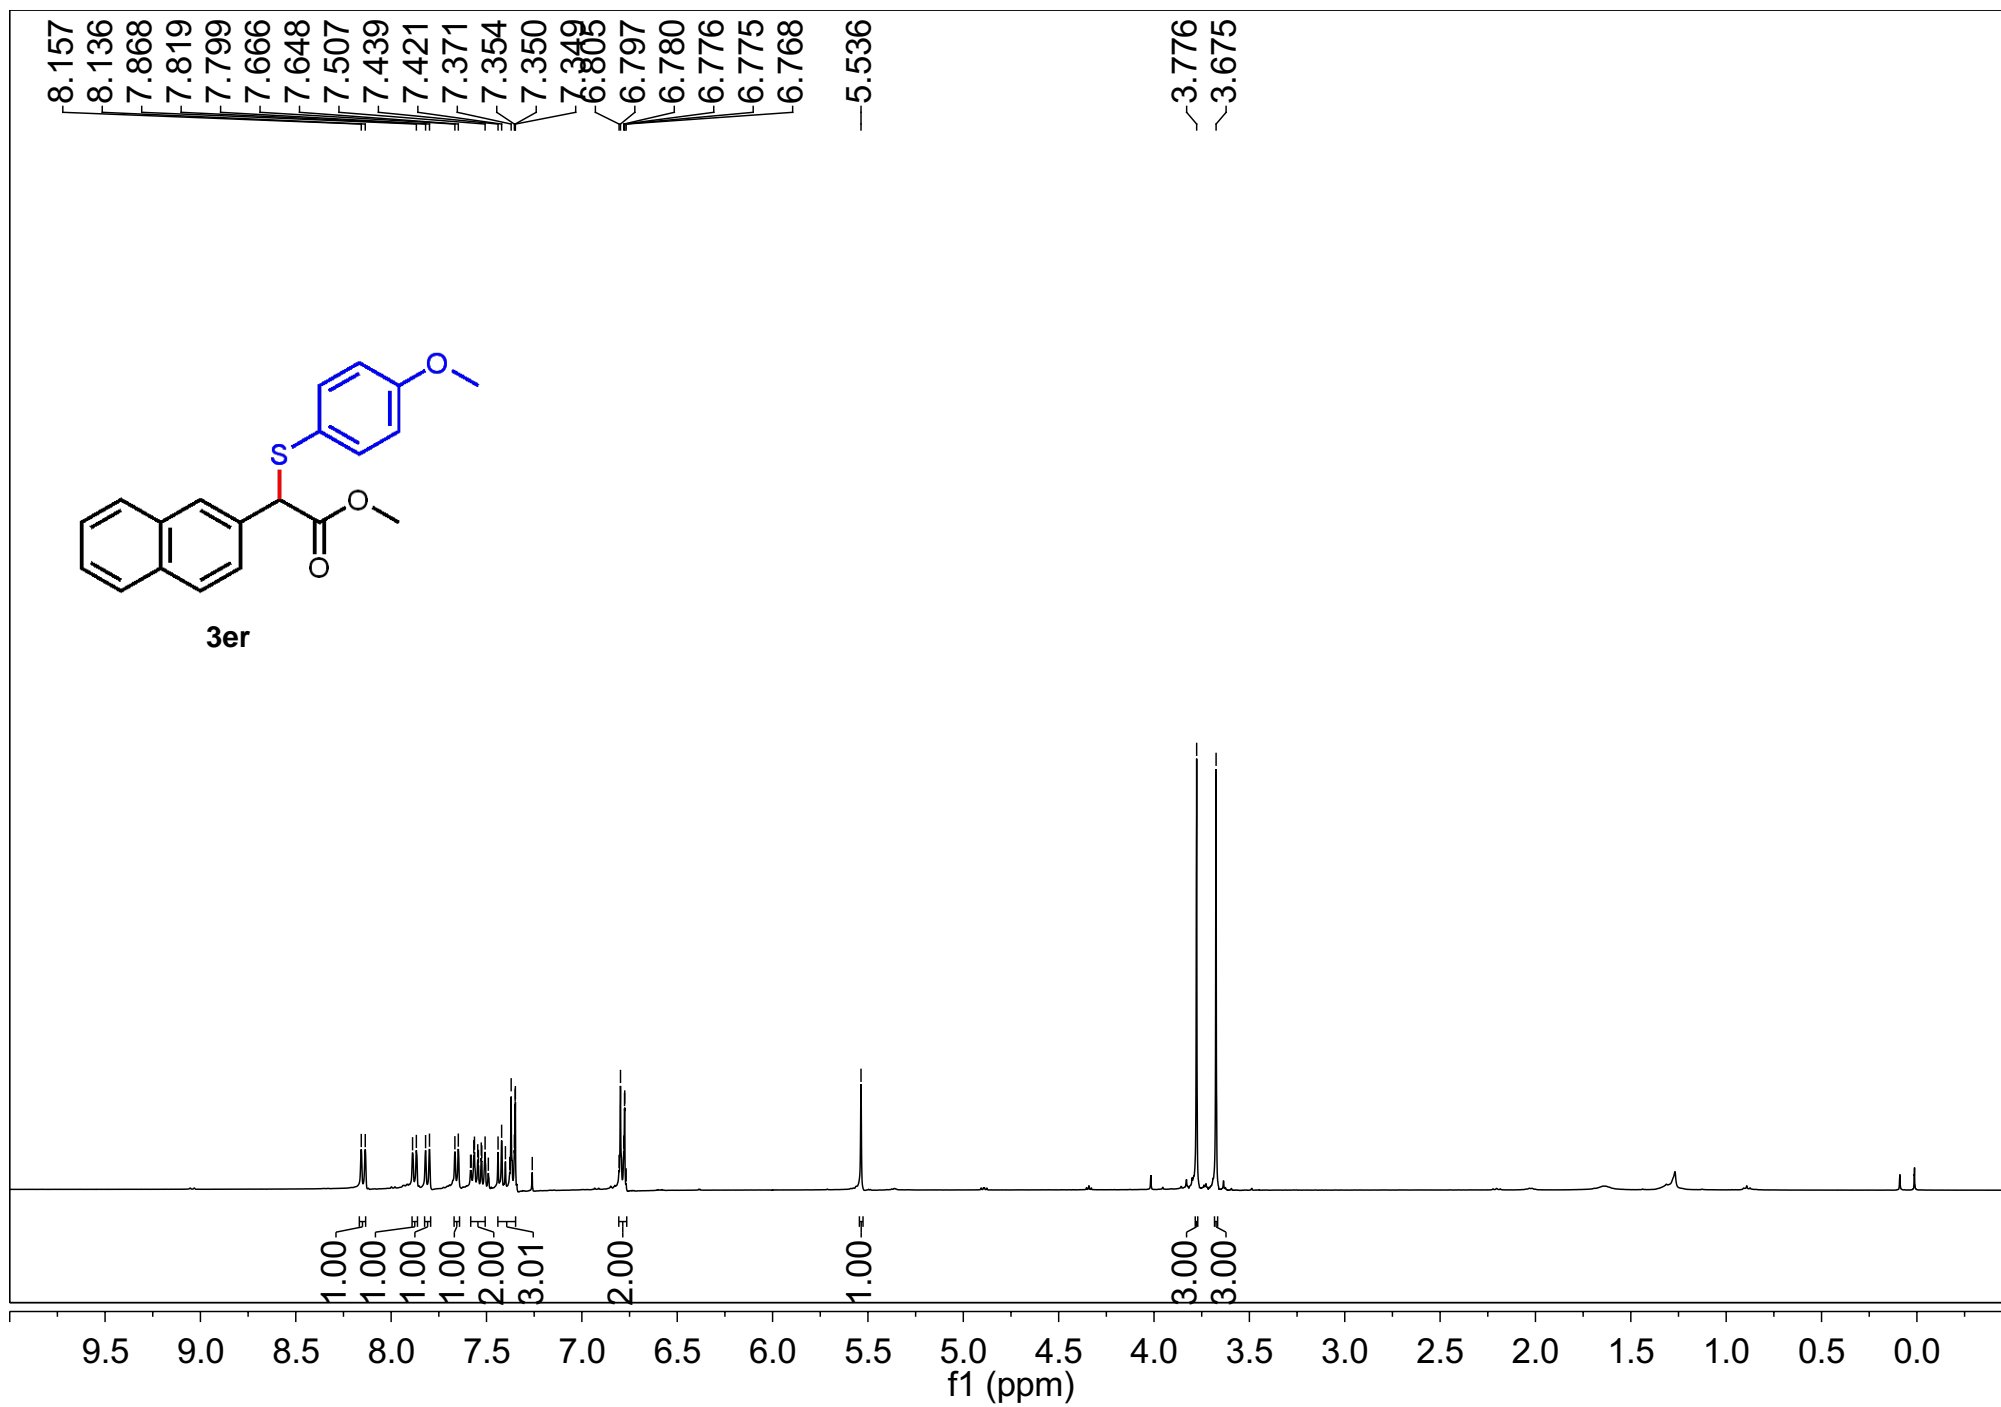

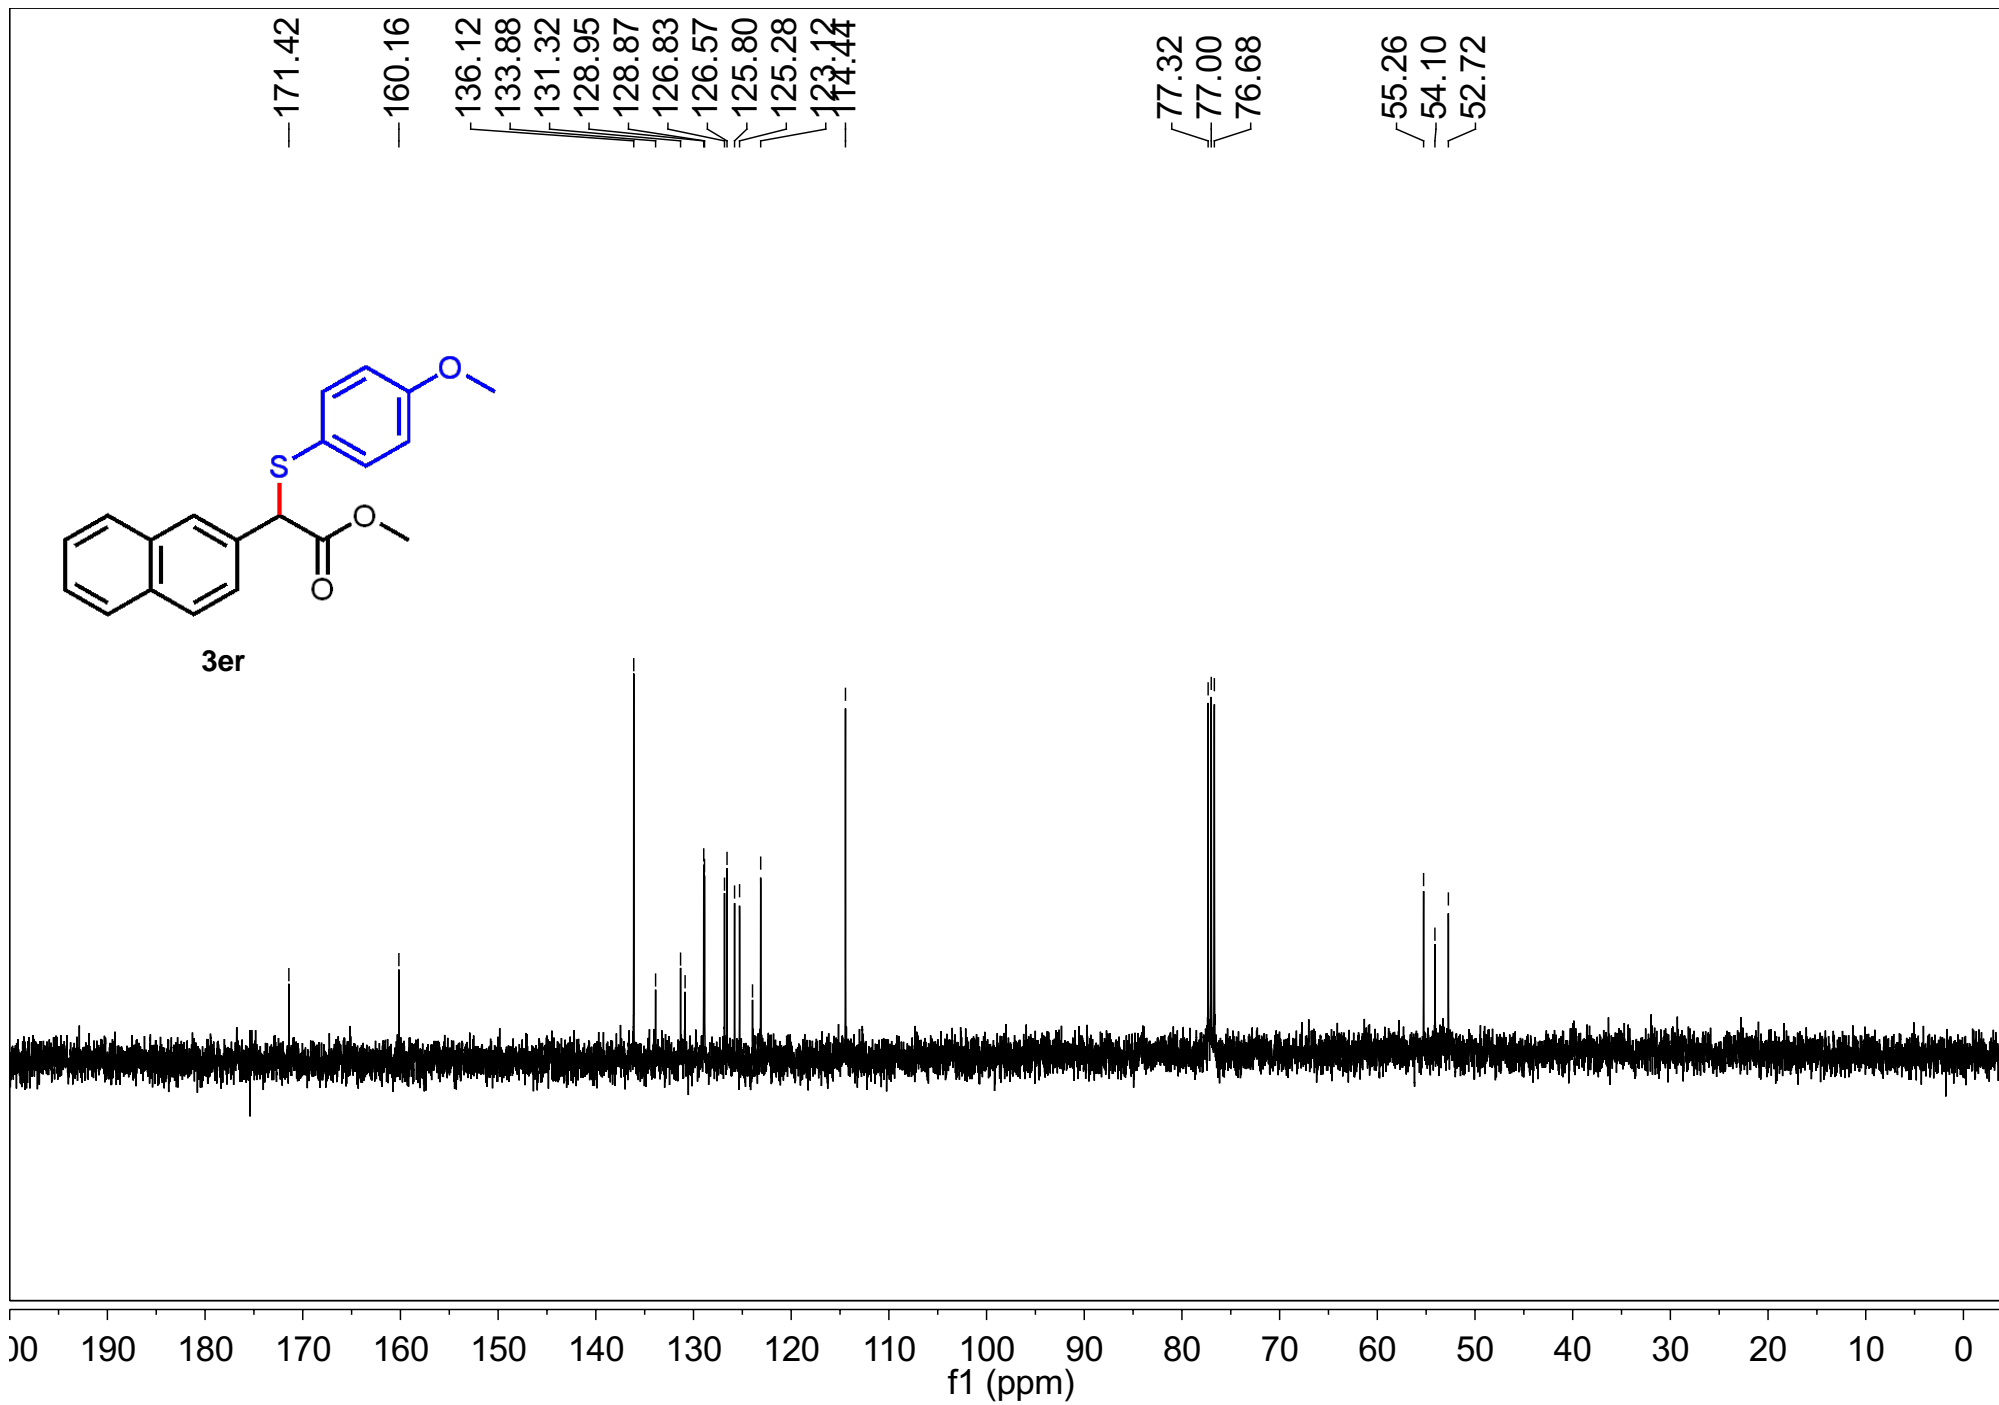

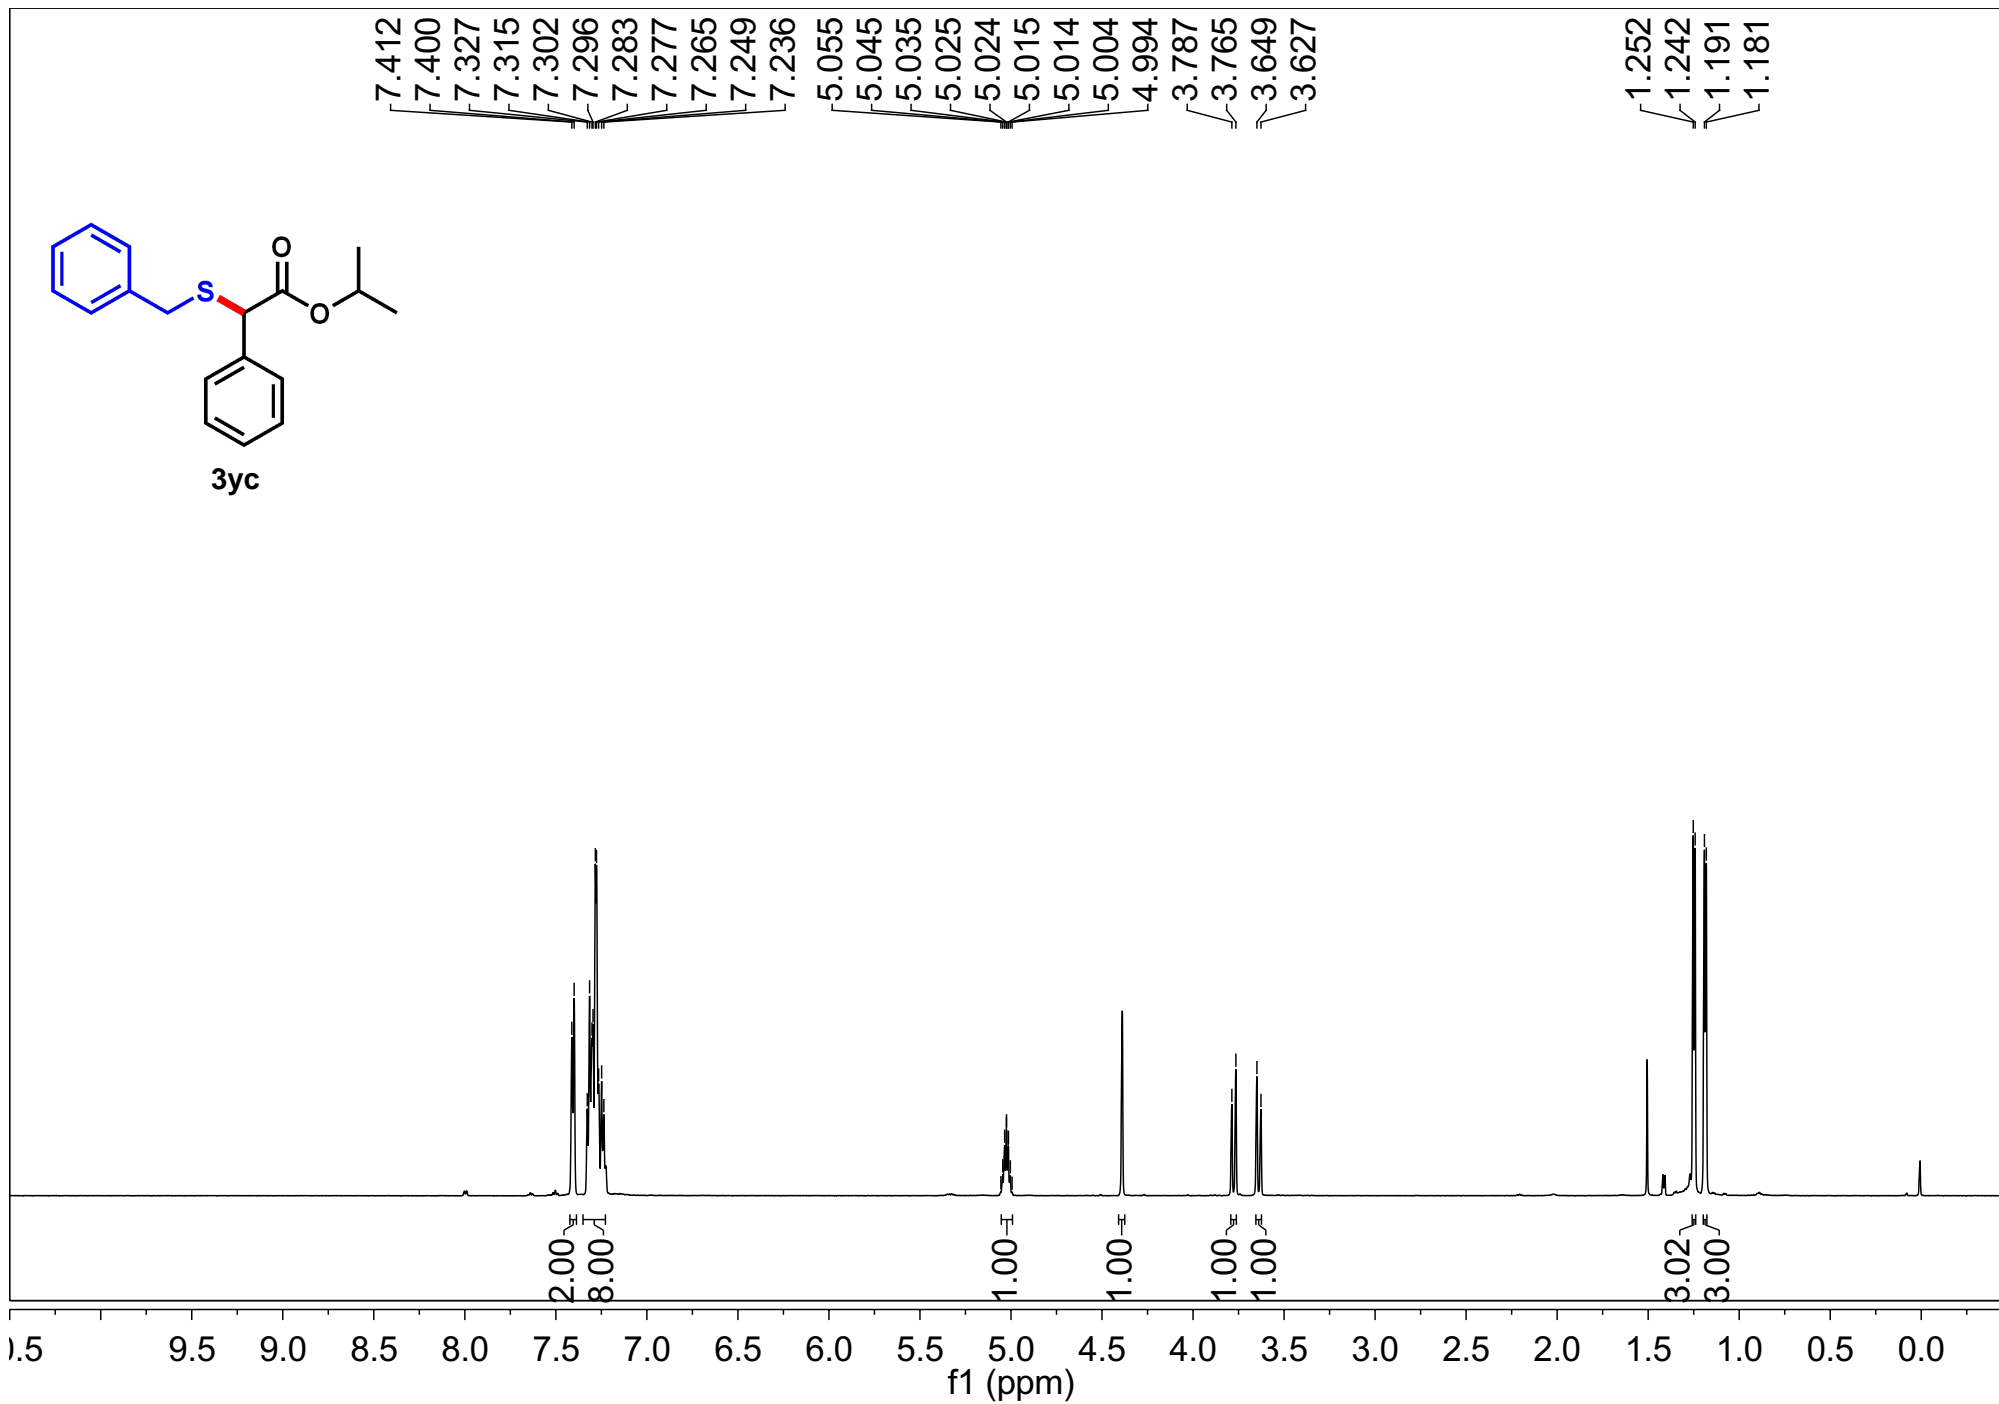

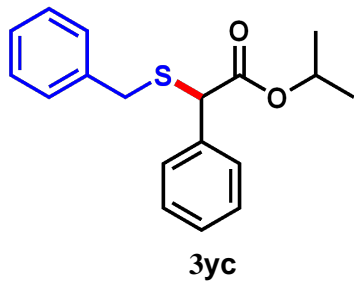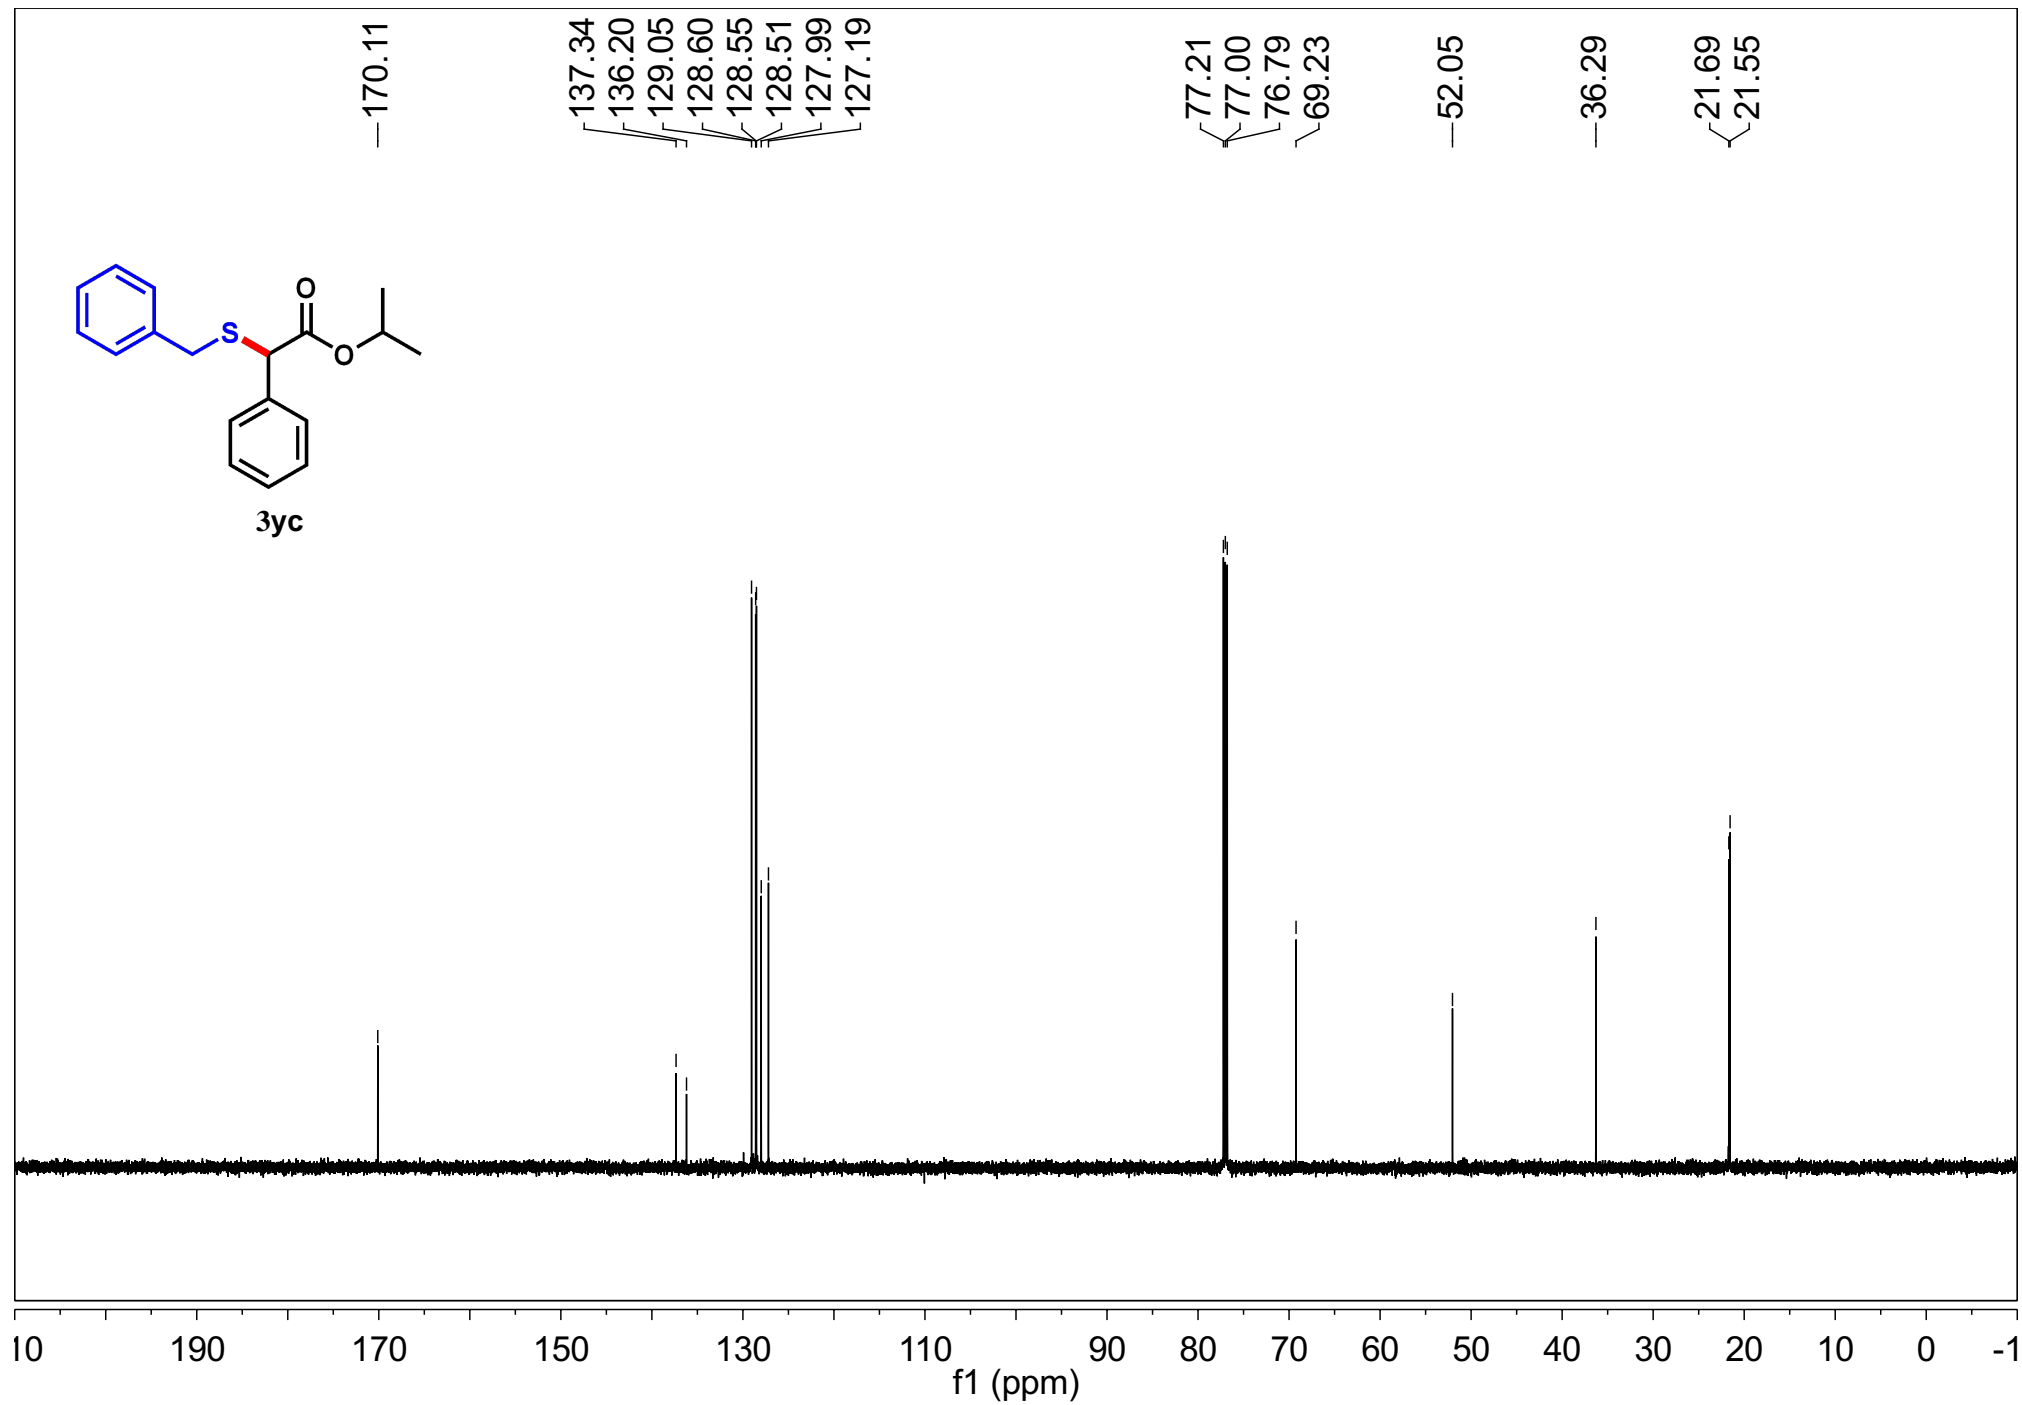

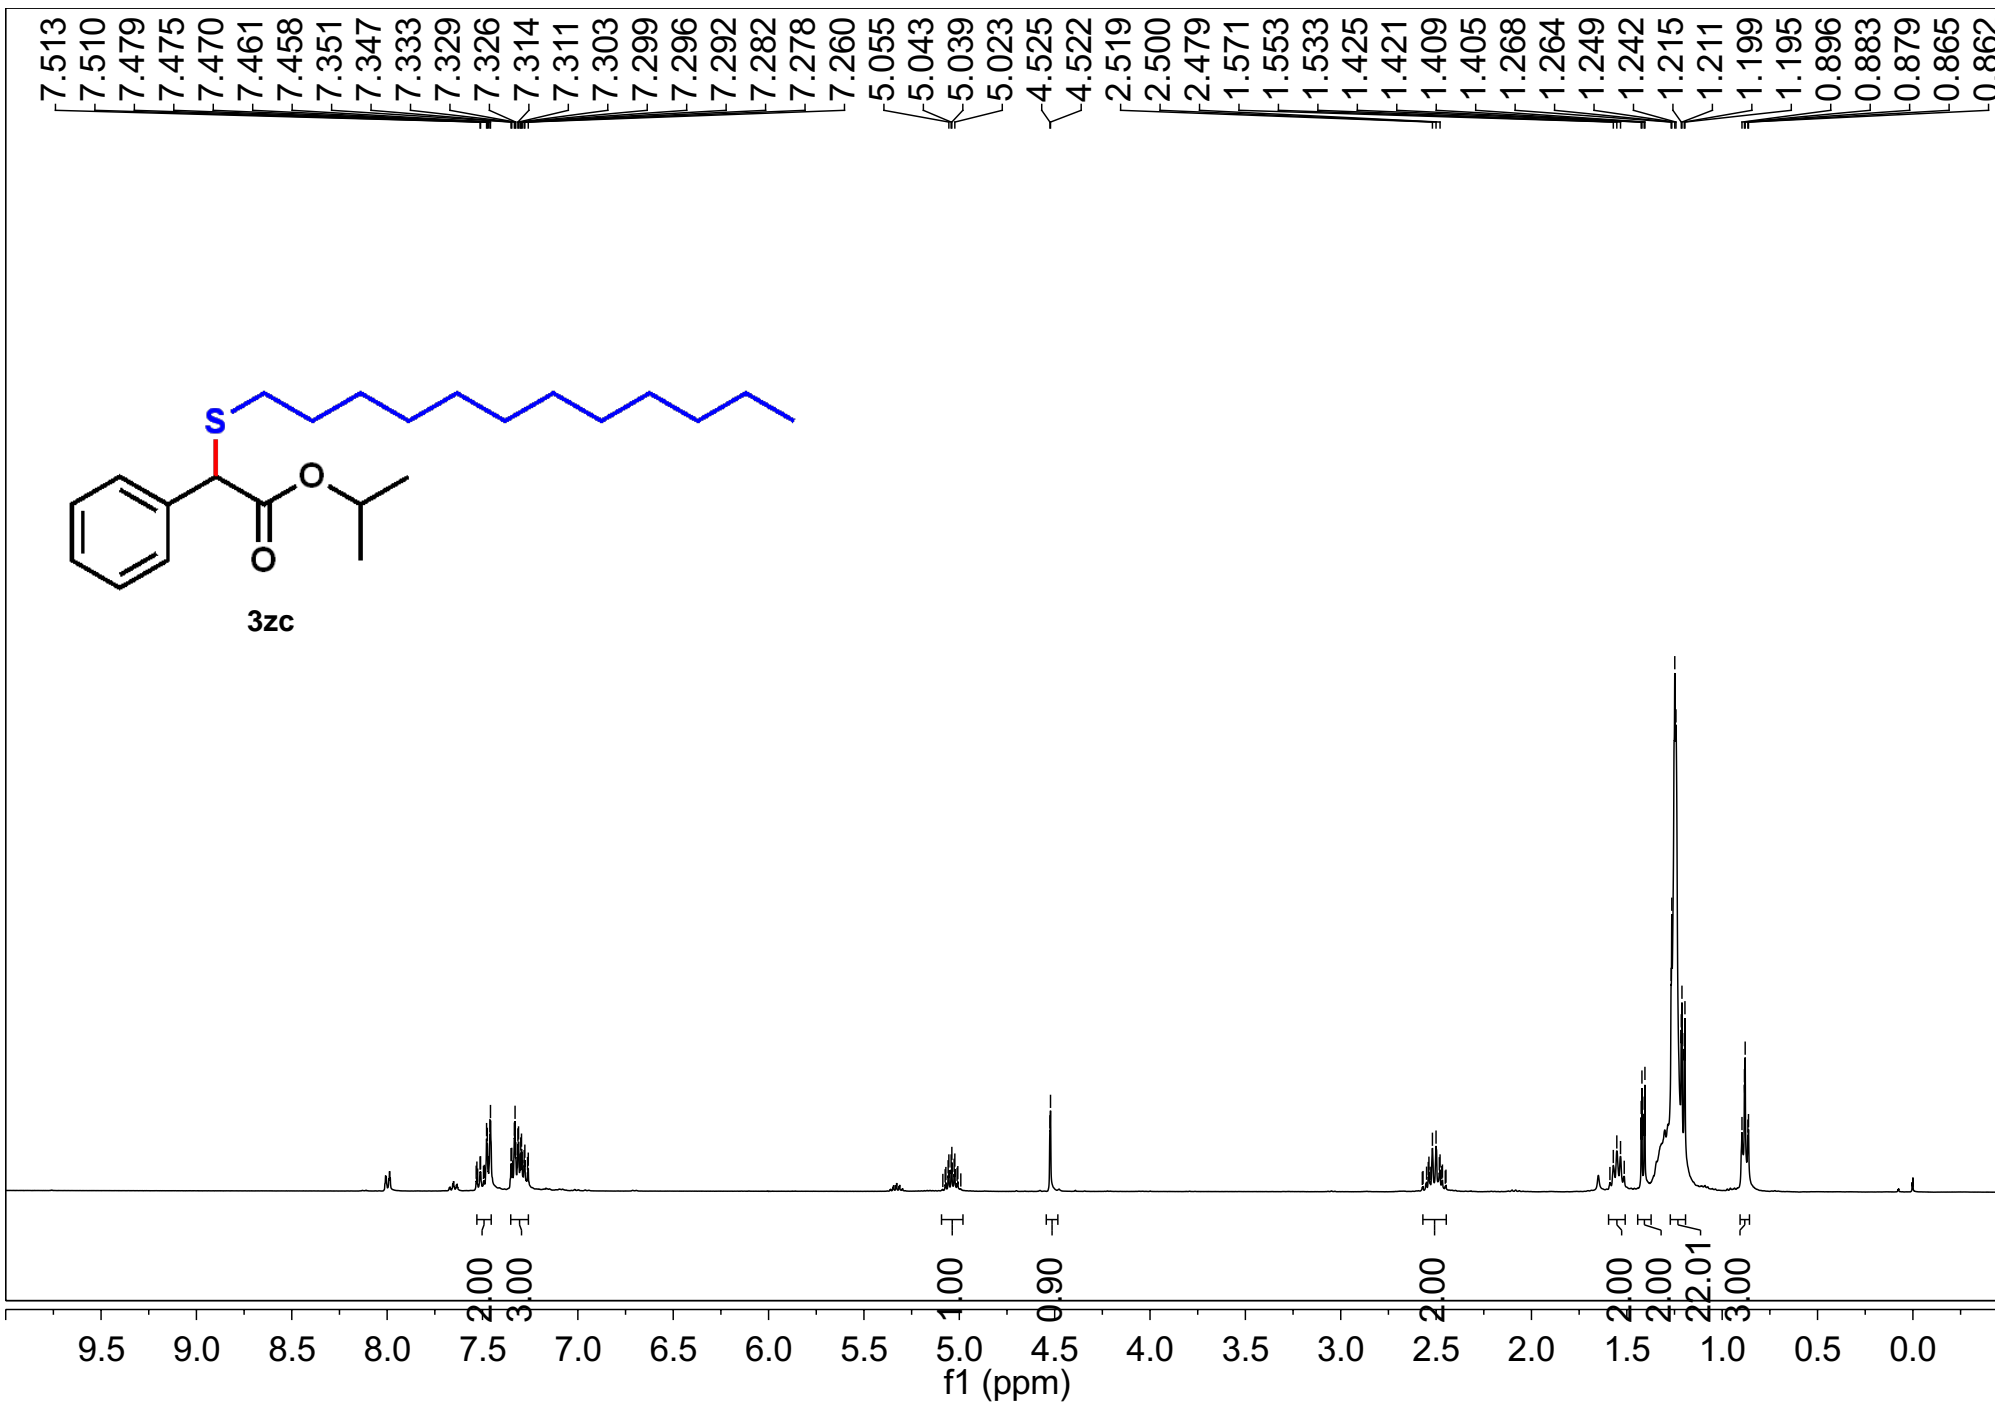

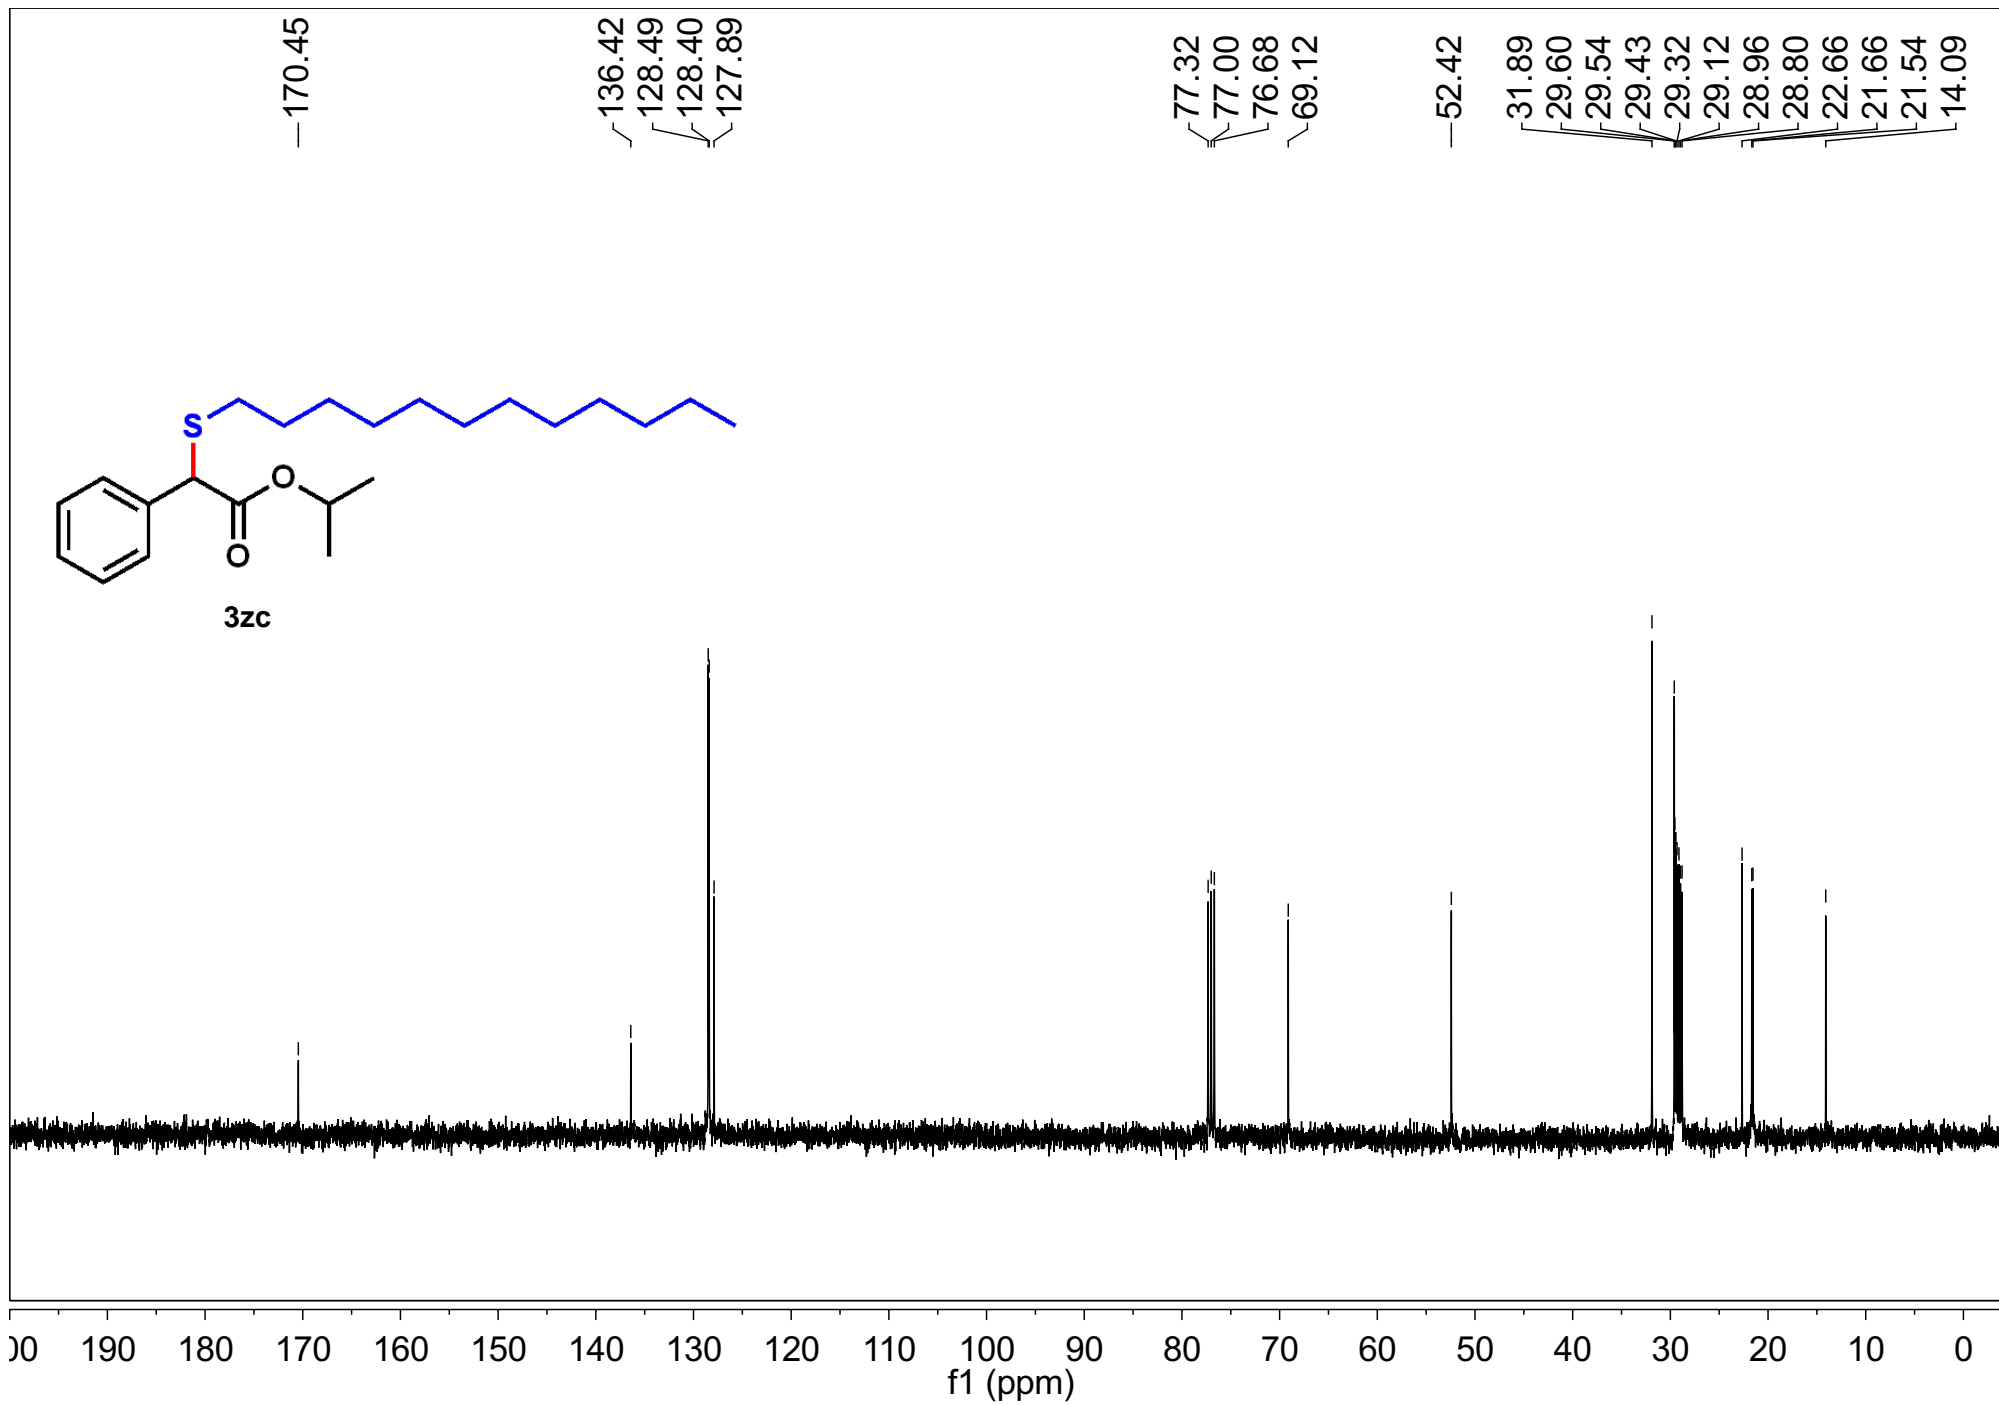

Supplement: d0ob02006k1.pdf [file d0ob02006k1.pdf]
